# Supplementary material for: Transferrable selectivity profiles enable prediction in synergistic catalyst space
Source: Royal Society of Chemistry journal article supplement (doi:10.1039/d2sc05974f), 2023-01-01
Supplement: d2sc05974f2.pdf [file d2sc05974f2.pdf]

# Transferrable Selectivity Profiles Enable Prediction In Synergistic Catalyst Space

Yutao Kuang, Junshan Lai and Jolene P. Reid\*

Correspondence to: [jreid@chem.ubc.ca](mailto:jreid@chem.ubc.ca)

Department of Chemistry, University of British Columbia, 2036 Main Mall, Vancouver, British Columbia, V6T 1Z1, Canada

## Table of contents

|                                                                                                    |      |
|----------------------------------------------------------------------------------------------------|------|
| <i>Full list of authors in the Gaussian reference</i>                                              | S2   |
| <i>Computational details</i>                                                                       | S3   |
| <i>Benchmarking the ability of M06/def2TZVP to reproduce M062X/def2TZVP geometries</i>             | S4   |
| <i>Cartesian coordinates of the reaction components relevant to chiral Brønsted acid catalysis</i> | S5   |
| <i>Cartesian coordinates of reaction components relevant to chiral phosphate catalysis</i>         | S48  |
| <i>Cartesian coordinates of reaction components relevant to secondary amine catalysis</i>          | S132 |
| <i>Parameters collected</i>                                                                        | S341 |
| <i>Data curation</i>                                                                               | S342 |
| <i>Model development</i>                                                                           | S345 |
| <i>Unsuccessful reactions</i>                                                                      | S361 |
| <i>General experimental information</i>                                                            | S362 |
| <i>Characterization data</i>                                                                       | S364 |
| <i>References</i>                                                                                  | S368 |

## Full list of authors in the Gaussian reference

M. J. Frisch, G. W. Trucks, H. B. Schlegel, G. E. Scuseria, M. A. Robb, J. R. Cheeseman, G. Scalmani, V. Barone, G. A. Petersson, H. Nakatsuji, X. Li, M. Caricato, A. V. Marenich, J. Bloino, B. G. Janesko, R. Gomperts, B. Mennucci, H. P. Hratchian, J. V. Ortiz, A. F. Izmaylov, J. L. Sonnenberg, D. Williams-Young, F. Ding, F. Lipparini, F. Egidi, J. Goings, B. Peng, A. Petrone, T. Henderson, D. Ranasinghe, V. G. Zakrzewski, J. Gao, N. Rega, G. Zheng, W. Liang, M. Hada, M. Ehara, K. Toyota, R. Fukuda, J. Hasegawa, M. Ishida, T. Nakajima, Y. Honda, O. Kitao, H. Nakai, T. Vreven, K. Throssell, J. A. Montgomery, Jr., J. E. Peralta, F. Ogliaro, M. J. Bearpark, J. J. Heyd, E. N. Brothers, K. N. Kudin, V. N. Staroverov, T. A. Keith, R. Kobayashi, J. Normand, K. Raghavachari, A. P. Rendell, J. C. Burant, S. S. Iyengar, J. Tomasi, M. Cossi, J. M. Millam, M. Klene, C. Adamo, R. Cammi, J. W. Ochterski, R. L. Martin, K. Morokuma, O. Farkas, J. B. Foresman, and D. J. Fox, Gaussian, Inc., Wallingford CT, 2016.

## Computational details

Unless otherwise noted, all reaction components were optimized in the gas-phase with the M06-2X density functional,<sup>1</sup> and the triple- $\zeta$  valence quality def2-TZVP basis set of Weigend and Ahlrichs,<sup>2</sup> as implemented in Gaussian 16 (revision B.01 or C.01).<sup>3</sup> All of the optimized geometries were verified by frequency computations as minima (zero imaginary frequencies). Gaussian input files were written using a Python script.<sup>4</sup> Parameters were acquired from these ground state structures. NBO charges were calculated using NBO6,<sup>5</sup> at the same level. Sterimol values were calculated using a modified version of Paton's Python script to accommodate non-terminal reference atoms.<sup>6</sup> For molecules including a metal atom the M06-2X/def2TZP level of theory is not applicable. In these cases the functional is altered to M06 and the calculations and parameter collection performed in the same way. The computational method used for newly calculated molecules are specified where the xyz coordinates are noted. In some cases, parameter tables have been recycled and this is noted where relevant in both the main text discussion and the parameter descriptions below.

Conformational searches were performed with Macromodel version 11.7<sup>7</sup> and the OPLS3 force field.<sup>8</sup> Conformations were generated using the mixed Monte Carlo Multiple Minimum (MCMC)/Low-Mode conformational search method and default RMSE atom coordinate cutoff (0.5 Å). Conformers generated within a 10 kJ/mol energy window were chosen for further analysis with DFT.

Multidimensional regression analyses were performed using MATLAB®.<sup>9</sup>

## Benchmarking the ability of M06/def2TZVP to reproduce M06-2X/def2TZVP nucleophile geometries

We re-evaluated the geometry of the nucleophile structures by performing a re-optimization at the M06/def2TZVP level of theory. Geometry comparisons quantified by RMSD showed that the structures were unaltered between the two optimization methods. Expectedly, evaluation of the key parameters ( $H-X-C_{Nu}$  and  $B5_{Nu}$ ) provided similar results to the M06-2X/def2TZVP optimized system. It should be noted that RMSD was calculated from superimposed structures defined by Atom Specification Language (ASL) as implemented within Maestro.

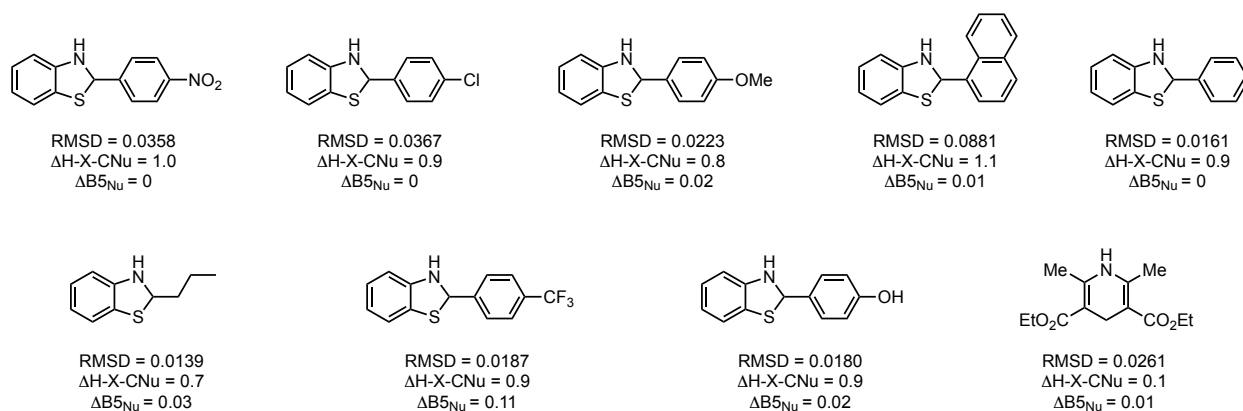

Figure S1. Comparing structural and key parameter changes when the optimization functional is altered from M06-2X to M06.

## Cartesian coordinates of the reaction components relevant to chiral Brønsted acid catalysis

For consistency with the previous statistical model,<sup>10</sup> all iminium components were optimized with Gaussian 09 (rev. D.01). Reaction components required for re-creating the statistical model have been published elsewhere (ref 10).

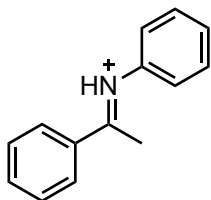

### Hydrogenation *E*-Iminium 1

M06-2X/def2-TZVP Geometry

|   |          |          |          |
|---|----------|----------|----------|
| C | -4.18935 | 0.58002  | -0.55723 |
| C | -2.86361 | 0.97323  | -0.60187 |
| C | -1.87746 | 0.17005  | -0.02064 |
| C | -2.24826 | -1.01384 | 0.63160  |
| C | -3.57676 | -1.38961 | 0.68878  |
| C | -4.54685 | -0.59703 | 0.08708  |
| C | -0.46779 | 0.55381  | -0.07920 |
| N | 0.42119  | -0.39343 | -0.14018 |
| C | -0.05652 | 1.98053  | -0.05209 |
| C | 1.85118  | -0.27999 | -0.06627 |
| C | 2.60869  | -0.89506 | -1.05207 |
| C | 3.99049  | -0.81855 | -0.97804 |
| C | 4.59562  | -0.14242 | 0.07340  |
| C | 3.82305  | 0.45479  | 1.06046  |
| C | 2.44018  | 0.38485  | 0.99942  |
| H | -4.94602 | 1.19445  | -1.02571 |
| H | -2.60263 | 1.88359  | -1.12262 |
| H | -1.50809 | -1.61174 | 1.15073  |
| H | -3.85882 | -2.29169 | 1.21431  |
| H | -5.58676 | -0.89351 | 0.12941  |
| H | 0.06494  | -1.33752 | -0.25941 |
| H | -0.72530 | 2.56646  | -0.67893 |
| H | -0.17061 | 2.36193  | 0.96604  |
| H | 0.97140  | 2.12017  | -0.37389 |
| H | 2.12469  | -1.41436 | -1.87004 |
| H | 4.59338  | -1.28786 | -1.74343 |
| H | 4.29663  | 0.96582  | 1.88766  |
| H | 1.82863  | 0.82153  | 1.77878  |
| H | 5.67457  | -0.08800 | 0.12845  |

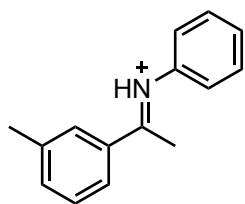

## Hydrogenation *E*-Iminium 2

M06-2X/def2-TZVP Geometry

|   |          |          |          |
|---|----------|----------|----------|
| C | 3.85557  | 0.31827  | 0.24368  |
| C | 2.54668  | 0.77748  | 0.23746  |
| C | 1.49086  | -0.05861 | -0.14396 |
| C | 1.75904  | -1.36817 | -0.55757 |
| C | 3.06422  | -1.82587 | -0.57422 |
| C | 4.09651  | -0.99312 | -0.17016 |
| C | 0.11152  | 0.42327  | -0.11811 |
| C | -0.21778 | 1.84008  | -0.41863 |
| N | -0.82809 | -0.43145 | 0.16328  |
| C | -2.25057 | -0.23998 | 0.12407  |
| C | -2.98999 | -0.61136 | 1.23760  |
| C | -4.36715 | -0.45922 | 1.20718  |
| C | -4.98708 | 0.05002  | 0.07363  |
| C | -4.23426 | 0.40229  | -1.03872 |
| C | -2.85622 | 0.25348  | -1.02231 |
| C | 4.99033  | 1.19663  | 0.68427  |
| H | 2.35376  | 1.78764  | 0.57291  |
| H | 0.96643  | -2.00702 | -0.92840 |
| H | 3.27889  | -2.82917 | -0.91606 |
| H | 5.11547  | -1.36166 | -0.18416 |
| H | 0.52754  | 2.49292  | 0.02908  |
| H | -0.15763 | 1.99377  | -1.49927 |
| H | -1.21056 | 2.11466  | -0.07409 |
| H | -0.52111 | -1.35463 | 0.45663  |
| H | -2.49482 | -1.00209 | 2.11785  |
| H | -4.95488 | -0.73854 | 2.07074  |
| H | -6.06236 | 0.16464  | 0.05379  |
| H | -4.71991 | 0.78225  | -1.92704 |
| H | -2.26316 | 0.49623  | -1.89463 |
| H | 5.46643  | 0.78666  | 1.57596  |
| H | 5.75158  | 1.25829  | -0.09392 |
| H | 4.65092  | 2.20497  | 0.91236  |

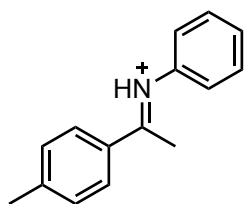

### Hydrogenation *E*-Iminium 3

M06-2X/def2-TZVP Geometry

|   |          |          |          |
|---|----------|----------|----------|
| C | 3.69034  | 1.02837  | -0.00457 |
| C | 2.33910  | 1.27079  | 0.15662  |
| C | 1.42463  | 0.21312  | 0.15140  |
| C | 1.90928  | -1.09715 | 0.01575  |
| C | 3.25879  | -1.32842 | -0.12336 |
| C | 4.17491  | -0.27003 | -0.14594 |
| C | 0.00296  | 0.49917  | 0.27388  |
| C | -0.46484 | 1.77029  | 0.89444  |
| N | -0.86295 | -0.37036 | -0.15959 |
| C | -2.29916 | -0.28223 | -0.13971 |
| C | -3.01014 | -1.29547 | 0.48554  |
| C | -4.39545 | -1.24057 | 0.48272  |
| C | -5.04997 | -0.18840 | -0.14378 |
| C | -4.32355 | 0.81121  | -0.77684 |
| C | -2.93779 | 0.76697  | -0.78348 |
| H | 1.99539  | 2.29148  | 0.25868  |
| H | 1.24480  | -1.95154 | 0.07350  |
| H | 3.62146  | -2.34547 | -0.20551 |
| H | -1.48592 | 1.68333  | 1.25594  |
| H | 0.19938  | 2.04580  | 1.70972  |
| H | -0.43619 | 2.57168  | 0.15142  |
| H | -0.49080 | -1.21407 | -0.58298 |
| H | -2.48850 | -2.10718 | 0.97686  |
| H | -4.96208 | -2.02054 | 0.97249  |
| H | -6.13086 | -0.15112 | -0.14490 |
| H | -4.83451 | 1.62229  | -1.27730 |
| H | -2.36147 | 1.52481  | -1.29837 |
| H | 4.38261  | 1.86017  | -0.01742 |
| C | 5.63829  | -0.54580 | -0.29980 |
| H | 5.82390  | -1.12992 | -1.20227 |
| H | 6.21596  | 0.37382  | -0.35560 |
| H | 6.00303  | -1.13202 | 0.54565  |

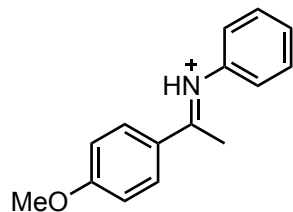

### Hydrogenation *E*-Iminium 4

M06-2X/def2-TZVP Geometry

|   |          |          |          |
|---|----------|----------|----------|
| C | -3.32659 | 0.86124  | -0.33484 |
| C | -1.98212 | 1.15885  | -0.39713 |
| C | -1.00453 | 0.22376  | -0.03080 |
| C | -1.43866 | -1.03221 | 0.44664  |
| C | -2.76857 | -1.33889 | 0.52221  |
| C | -3.73429 | -0.39794 | 0.12043  |
| C | 0.39930  | 0.55314  | -0.12688 |
| C | 0.85063  | 1.96820  | -0.25858 |
| N | 1.28677  | -0.40784 | -0.11365 |
| C | 2.71681  | -0.29925 | -0.04113 |
| C | 3.47734  | -0.95079 | -1.00062 |
| C | 4.85976  | -0.88262 | -0.92048 |
| C | 5.46438  | -0.17420 | 0.10922  |
| C | 4.68972  | 0.46300  | 1.06958  |
| C | 3.30675  | 0.39756  | 1.00371  |
| H | -1.69685 | 2.13692  | -0.75732 |
| H | -0.73234 | -1.76464 | 0.81878  |
| H | -3.10912 | -2.29084 | 0.90527  |
| H | 0.31801  | 2.43434  | -1.08660 |
| H | 0.59789  | 2.52386  | 0.64581  |
| H | 1.91644  | 2.04239  | -0.44426 |
| H | 0.93349  | -1.35690 | -0.15525 |
| H | 2.99467  | -1.49329 | -1.80387 |
| H | 5.46342  | -1.38227 | -1.66564 |
| H | 6.54315  | -0.12476 | 0.16808  |
| H | 5.16127  | 1.00166  | 1.88010  |
| H | 2.69182  | 0.86667  | 1.76149  |
| H | -4.05001 | 1.60240  | -0.63902 |
| O | -4.99577 | -0.78689 | 0.22217  |
| C | -6.03534 | 0.11409  | -0.14637 |
| H | -6.96301 | -0.42195 | 0.02286  |
| H | -6.00590 | 1.00829  | 0.47788  |
| H | -5.95169 | 0.38458  | -1.19995 |



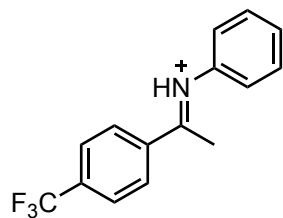

### Hydrogenation *E*-Iminium 5

M06-2X/def2-TZVP Geometry

|   |          |          |          |
|---|----------|----------|----------|
| C | 2.19305  | -0.90121 | 0.69032  |
| C | 0.83413  | -0.64754 | 0.65359  |
| C | 0.34454  | 0.47235  | -0.02705 |
| C | 1.23698  | 1.34117  | -0.66114 |
| C | 2.59325  | 1.07436  | -0.63863 |
| C | 3.06503  | -0.04221 | 0.03764  |
| C | -1.09963 | 0.72681  | -0.06401 |
| N | -1.89343 | -0.29871 | -0.12789 |
| C | -1.63386 | 2.11048  | -0.01477 |
| C | -3.32807 | -0.32498 | -0.05788 |
| C | -4.01304 | -1.03997 | -1.02970 |
| C | -5.39600 | -1.09724 | -0.96546 |
| C | -6.07298 | -0.45527 | 0.06358  |
| C | -5.37078 | 0.24087  | 1.03852  |
| C | -3.98735 | 0.30647  | 0.98703  |
| C | 4.54981  | -0.33222 | 0.03174  |
| F | 4.90004  | -1.09869 | 1.06103  |
| F | 4.89231  | -0.96933 | -1.08902 |
| F | 5.25729  | 0.79371  | 0.09087  |
| H | 2.57594  | -1.75165 | 1.23799  |
| H | 0.16401  | -1.29214 | 1.21011  |
| H | 0.88273  | 2.20726  | -1.20231 |
| H | 3.28722  | 1.73722  | -1.13843 |
| H | -1.45013 | -1.20437 | -0.25864 |
| H | -1.00443 | 2.76739  | -0.61086 |
| H | -2.66419 | 2.16680  | -0.35447 |
| H | -1.57490 | 2.47434  | 1.01491  |
| H | -3.47511 | -1.53269 | -1.83037 |
| H | -5.94360 | -1.64349 | -1.72123 |
| H | -5.89805 | 0.72510  | 1.84919  |
| H | -3.43004 | 0.82028  | 1.75975  |
| H | -7.15248 | -0.50550 | 0.11097  |

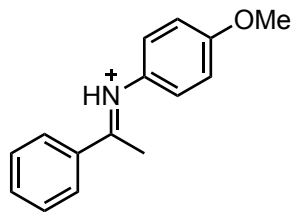

### Hydrogenation *E*-Iminium 6

M06-2X/def2-TZVP Geometry

|   |          |          |          |
|---|----------|----------|----------|
| C | 5.04803  | 0.41116  | -0.68615 |
| C | 3.73717  | 0.85138  | -0.73178 |
| C | 2.74154  | 0.15343  | -0.04104 |
| C | 3.09027  | -0.96972 | 0.72110  |
| C | 4.40527  | -1.39211 | 0.77674  |
| C | 5.38335  | -0.70700 | 0.06623  |
| C | 1.34342  | 0.57989  | -0.10936 |
| N | 0.42468  | -0.33966 | -0.06820 |
| C | 0.97890  | 2.01619  | -0.21027 |
| C | -0.99482 | -0.18498 | 0.02149  |
| C | -1.79531 | -0.93866 | -0.82110 |
| C | -3.17408 | -0.83359 | -0.74576 |
| C | -3.75084 | 0.02769  | 0.19049  |
| C | -2.93054 | 0.76741  | 1.05295  |
| C | -1.56208 | 0.65924  | 0.97385  |
| O | -5.06454 | 0.20347  | 0.34514  |
| C | -5.95547 | -0.52391 | -0.48767 |
| H | 5.81123  | 0.94264  | -1.23806 |
| H | 3.49234  | 1.71337  | -1.33621 |
| H | 2.34535  | -1.47958 | 1.32117  |
| H | 4.67113  | -2.24690 | 1.38361  |
| H | 6.41208  | -1.04002 | 0.10769  |
| H | 0.75555  | -1.29981 | -0.10594 |
| H | 1.06802  | 2.47774  | 0.77675  |
| H | 1.68594  | 2.52990  | -0.85719 |
| H | -0.03422 | 2.15590  | -0.57778 |
| H | -1.34687 | -1.60337 | -1.54978 |
| H | -3.78592 | -1.42223 | -1.41247 |
| H | -3.40028 | 1.40864  | 1.78608  |
| H | -0.93504 | 1.20948  | 1.66349  |
| H | -5.83649 | -1.59862 | -0.33542 |
| H | -6.95416 | -0.22156 | -0.18989 |
| H | -5.79403 | -0.27428 | -1.53835 |

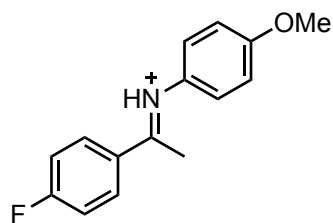

### Hydrogenation *E*-Iminium 7

M06-2X/def2-TZVP Geometry

|   |          |          |          |
|---|----------|----------|----------|
| C | -2.19313 | -0.90729 | -0.86394 |
| C | -3.57321 | -0.84378 | -0.76821 |
| C | -4.16132 | -0.03536 | 0.20718  |
| C | -3.35060 | 0.69306  | 1.08819  |
| C | -1.98086 | 0.62579  | 0.98910  |
| C | -1.40297 | -0.16514 | -0.00175 |
| N | 0.01924  | -0.27808 | -0.11029 |
| C | 0.91224  | 0.66920  | -0.12750 |
| C | 2.31989  | 0.28807  | -0.06435 |
| C | 0.50051  | 2.09564  | -0.19370 |
| C | 3.30395  | 1.05679  | -0.69862 |
| C | 4.62883  | 0.67346  | -0.65705 |
| C | 4.96838  | -0.47118 | 0.04642  |
| C | 4.02606  | -1.24340 | 0.70810  |
| C | 2.70299  | -0.86060 | 0.64468  |
| F | 6.23761  | -0.83291 | 0.10045  |
| O | -5.47712 | 0.09827  | 0.38345  |
| C | -6.35842 | -0.62115 | -0.46647 |
| H | -1.73576 | -1.53001 | -1.62353 |
| H | -4.17723 | -1.42325 | -1.44996 |
| H | -3.82879 | 1.29126  | 1.85161  |
| H | -1.35979 | 1.16587  | 1.69219  |
| H | 0.37379  | -1.22727 | -0.18177 |
| H | -0.52292 | 2.20917  | -0.54052 |
| H | 0.59373  | 2.54295  | 0.79928  |
| H | 1.17544  | 2.64470  | -0.84622 |
| H | 3.04023  | 1.94036  | -1.26194 |
| H | 5.40186  | 1.24064  | -1.15672 |
| H | 4.34367  | -2.11043 | 1.27058  |
| H | 1.97213  | -1.43023 | 1.20652  |
| H | -6.21076 | -1.69722 | -0.35435 |
| H | -7.36117 | -0.35512 | -0.14826 |
| H | -6.21479 | -0.32954 | -1.50893 |

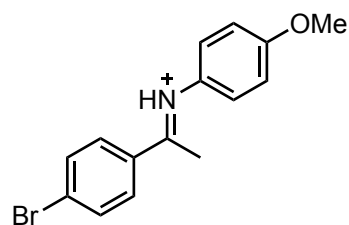

**Hydrogenation *E*-Iminium 8**

M06-2X/def2-TZVP Geometry

|    |          |          |          |
|----|----------|----------|----------|
| C  | -2.91557 | -0.90199 | 0.66631  |
| C  | -1.57252 | -0.58847 | 0.62365  |
| C  | -1.12145 | 0.54146  | -0.07301 |
| C  | -2.05801 | 1.36040  | -0.71348 |
| C  | -3.40153 | 1.04068  | -0.69016 |
| C  | -3.82708 | -0.08936 | -0.00052 |
| C  | 0.30560  | 0.84851  | -0.12219 |
| C  | 0.79310  | 2.25102  | -0.17815 |
| N  | 1.14495  | -0.14644 | -0.10472 |
| C  | 2.57048  | -0.11807 | 0.00260  |
| C  | 3.31023  | -0.92855 | -0.84323 |
| C  | 4.69164  | -0.95103 | -0.75114 |
| C  | 5.33277  | -0.16058 | 0.20570  |
| C  | 4.57214  | 0.63814  | 1.07061  |
| C  | 3.20066  | 0.65641  | 0.97496  |
| H  | -0.88112 | -1.19897 | 1.19259  |
| H  | -1.74622 | 2.23379  | -1.26843 |
| H  | -4.12040 | 1.66339  | -1.20383 |
| Br | -5.65087 | -0.51515 | 0.04676  |
| H  | 1.81705  | 2.31124  | -0.53685 |
| H  | 0.14041  | 2.84364  | -0.81424 |
| H  | 0.73921  | 2.69049  | 0.82116  |
| H  | 0.73740  | -1.07384 | -0.18215 |
| H  | 2.81218  | -1.53762 | -1.58799 |
| H  | 5.25583  | -1.58120 | -1.42180 |
| O  | 6.65454  | -0.10911 | 0.37894  |
| H  | 5.08929  | 1.22142  | 1.81984  |
| H  | 2.61827  | 1.24872  | 1.66858  |
| C  | 7.48569  | -0.90496 | -0.45319 |
| H  | 7.26250  | -1.96549 | -0.32176 |
| H  | 7.36643  | -0.62400 | -1.50138 |
| H  | 8.50350  | -0.70434 | -0.13527 |
| H  | -3.26200 | -1.76069 | 1.22381  |

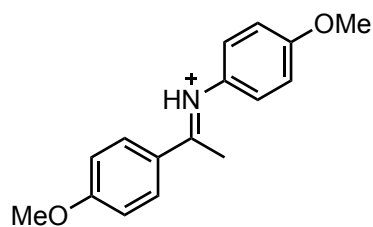

**Hydrogenation *E*-Iminium 9**

M06-2X/def2-TZVP Geometry

|   |          |          |          |
|---|----------|----------|----------|
| C | -4.20500 | 0.79078  | -0.41347 |
| C | -2.86856 | 1.12274  | -0.48804 |
| C | -1.86856 | 0.24219  | -0.05664 |
| C | -2.27040 | -0.99143 | 0.49842  |
| C | -3.59252 | -1.33041 | 0.58783  |
| C | -4.58081 | -0.44579 | 0.12212  |
| C | -0.46998 | 0.60141  | -0.15747 |
| N | 0.43540  | -0.34072 | -0.11339 |
| C | -0.04771 | 2.02183  | -0.31742 |
| C | 1.85665  | -0.20260 | -0.00571 |
| C | 2.66725  | -0.90079 | -0.88356 |
| C | 4.04637  | -0.80968 | -0.77772 |
| C | 4.61151  | -0.01408 | 0.22013  |
| C | 3.78106  | 0.67411  | 1.11376  |
| C | 2.41337  | 0.57553  | 1.00686  |
| O | 5.92553  | 0.14473  | 0.40661  |
| C | 6.82329  | -0.53814 | -0.45413 |
| H | -4.94606 | 1.48944  | -0.77173 |
| H | -1.54497 | -1.67515 | 0.92317  |
| H | -3.90887 | -2.26432 | 1.03184  |
| H | 0.09648  | -1.29588 | -0.13690 |
| H | 1.00967  | 2.10919  | -0.54468 |
| H | -0.62034 | 2.47691  | -1.12405 |
| H | -0.27092 | 2.58060  | 0.59331  |
| H | 2.22712  | -1.51141 | -1.66264 |
| H | 4.66594  | -1.35724 | -1.47185 |
| H | 4.24191  | 1.26612  | 1.89259  |
| H | 1.77339  | 1.08560  | 1.71616  |
| H | 6.69547  | -1.61933 | -0.36824 |
| H | 6.67987  | -0.22608 | -1.49085 |
| H | 7.81980  | -0.26144 | -0.12518 |
| H | -2.60913 | 2.08249  | -0.91174 |
| O | -5.83325 | -0.86162 | 0.24589  |
| C | -6.89334 | -0.01377 | -0.18259 |
| H | -7.80831 | -0.55912 | 0.02345  |
| H | -6.81564 | 0.18668  | -1.25241 |
| H | -6.88715 | 0.92165  | 0.37929  |

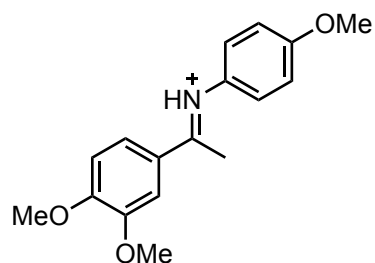

### Hydrogenation *E*-Iminium 10

M06-2X/def2-TZVP Geometry

|   |          |          |          |
|---|----------|----------|----------|
| C | -3.71353 | 0.62915  | 0.02954  |
| C | -2.38506 | 0.96995  | 0.13726  |
| C | -1.38152 | -0.02269 | 0.13722  |
| C | -1.75422 | -1.36348 | 0.06276  |
| C | -3.08745 | -1.72157 | -0.02491 |
| C | -4.07751 | -0.74450 | -0.05421 |
| C | 0.00710  | 0.37689  | 0.22865  |
| N | 0.94453  | -0.43478 | -0.18061 |
| C | 0.37777  | 1.70478  | 0.79656  |
| C | 2.36481  | -0.23315 | -0.17341 |
| C | 3.16996  | -1.18414 | 0.42843  |
| C | 4.54829  | -1.03462 | 0.42077  |
| C | 5.11881  | 0.07661  | -0.20121 |
| C | 4.29503  | 1.02342  | -0.82212 |
| C | 2.92771  | 0.86713  | -0.81480 |
| O | 6.43276  | 0.31698  | -0.26287 |
| C | 7.32265  | -0.60992 | 0.33842  |
| O | -5.37603 | -0.98081 | -0.14519 |
| O | -4.73599 | 1.48824  | -0.00558 |
| C | -4.45280 | 2.87215  | 0.09018  |
| C | -5.82585 | -2.32514 | -0.25252 |
| H | -2.11032 | 2.01292  | 0.18732  |
| H | -1.02220 | -2.15837 | 0.13653  |
| H | -3.35638 | -2.76683 | -0.05492 |
| H | 0.63740  | -1.31629 | -0.57592 |
| H | 1.40176  | 1.70639  | 1.16118  |
| H | 0.29344  | 2.47419  | 0.02446  |
| H | -0.30523 | 1.96112  | 1.60264  |
| H | 2.72542  | -2.04208 | 0.91797  |
| H | 5.16245  | -1.78213 | 0.89995  |
| H | 4.76056  | 1.86566  | -1.31530 |
| H | 2.29601  | 1.58568  | -1.32126 |
| H | 7.23165  | -1.59322 | -0.12785 |
| H | 8.32041  | -0.21716 | 0.17031  |
| H | 7.13568  | -0.68742 | 1.41167  |

|   |          |          |          |
|---|----------|----------|----------|
| H | -3.83097 | 3.20071  | -0.74638 |
| H | -5.41274 | 3.37697  | 0.04824  |
| H | -3.95879 | 3.10356  | 1.03729  |
| H | -6.90619 | -2.26787 | -0.33503 |
| H | -5.41130 | -2.79814 | -1.14473 |
| H | -5.55335 | -2.89481 | 0.63765  |

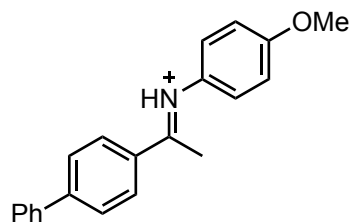

### Hydrogenation *E*-Iminium 11

M06-2X/def2-TZVP Geometry

|   |          |          |          |
|---|----------|----------|----------|
| C | 2.54588  | -1.01240 | -0.25400 |
| C | 1.18257  | -0.84701 | -0.34253 |
| C | 0.60789  | 0.42589  | -0.20780 |
| C | 1.45310  | 1.52114  | 0.00653  |
| C | 2.81678  | 1.34634  | 0.11305  |
| C | 3.39357  | 0.07891  | -0.01612 |
| C | -0.82927 | 0.63866  | -0.27700 |
| N | -1.63831 | -0.35869 | -0.05947 |
| C | -1.37998 | 1.98415  | -0.60499 |
| C | -3.07280 | -0.35810 | -0.05362 |
| C | -3.74386 | -1.28438 | -0.84805 |
| C | -5.11892 | -1.32084 | -0.83289 |
| C | -5.84094 | -0.43936 | -0.01802 |
| C | -5.15980 | 0.47247  | 0.78950  |
| C | -3.77393 | 0.50395  | 0.77092  |
| O | -7.17136 | -0.54975 | -0.07648 |
| C | -7.96252 | 0.31196  | 0.72654  |
| H | 2.97451  | -1.99363 | -0.40834 |
| H | 1.04011  | 2.51372  | 0.12787  |
| H | 3.44731  | 2.19981  | 0.32344  |
| H | -1.20916 | -1.25166 | 0.15862  |
| H | -2.39006 | 1.90925  | -0.99969 |
| H | -1.41310 | 2.60166  | 0.29633  |
| H | -0.73261 | 2.47781  | -1.32548 |
| H | -3.18803 | -1.96168 | -1.48486 |
| H | -5.66855 | -2.02206 | -1.44563 |
| H | -5.69442 | 1.14703  | 1.44128  |
| H | -3.24372 | 1.19093  | 1.41835  |

|   |          |          |          |
|---|----------|----------|----------|
| H | -8.99497 | 0.05868  | 0.50793  |
| H | -7.76094 | 0.14676  | 1.78702  |
| H | -7.77956 | 1.35768  | 0.47006  |
| H | 0.57835  | -1.71406 | -0.58428 |
| C | 7.61224  | -0.45702 | 0.25552  |
| C | 6.75500  | -1.42915 | 0.75356  |
| C | 5.38384  | -1.25859 | 0.66060  |
| C | 4.85229  | -0.10604 | 0.07946  |
| C | 5.72293  | 0.86849  | -0.41202 |
| C | 7.09371  | 0.68997  | -0.33002 |
| H | 8.68345  | -0.59391 | 0.32306  |
| H | 7.15612  | -2.31992 | 1.21829  |
| H | 4.72182  | -2.01044 | 1.07202  |
| H | 5.32639  | 1.75468  | -0.89157 |
| H | 7.75949  | 1.44408  | -0.72802 |

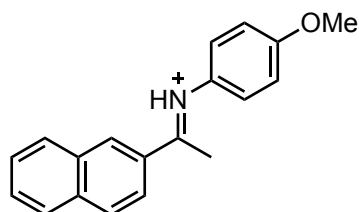

### Hydrogenation *E*-Iminium 12

M06-2X/def2-TZVP Geometry

|   |          |          |          |
|---|----------|----------|----------|
| C | -3.11141 | -1.82529 | -0.08905 |
| C | -1.81189 | -1.45045 | 0.04980  |
| C | -1.47308 | -0.07434 | 0.20288  |
| C | -2.47784 | 0.87132  | 0.21933  |
| C | -3.82799 | 0.50794  | 0.05527  |
| C | -4.15623 | -0.86426 | -0.10211 |
| C | -0.09041 | 0.36755  | 0.31209  |
| N | 0.85950  | -0.41393 | -0.11560 |
| C | 0.24606  | 1.68778  | 0.91744  |
| C | 2.27360  | -0.18179 | -0.13709 |
| C | 3.11055  | -1.16097 | 0.37073  |
| C | 4.48468  | -0.98606 | 0.33865  |
| C | 5.01983  | 0.17765  | -0.21648 |
| C | 4.16384  | 1.15064  | -0.74793 |
| C | 2.80022  | 0.97069  | -0.71509 |
| O | 6.32614  | 0.44606  | -0.29460 |
| C | 7.24977  | -0.50437 | 0.21336  |
| C | -4.86073 | 1.47628  | 0.05044  |
| C | -6.16215 | 1.09070  | -0.10033 |



|   |          |          |          |
|---|----------|----------|----------|
| C | -6.48725 | -0.27457 | -0.25278 |
| C | -5.50896 | -1.23191 | -0.25310 |
| H | -3.36722 | -2.87371 | -0.17824 |
| H | -1.05428 | -2.22287 | 0.10513  |
| H | -2.24504 | 1.92309  | 0.33209  |
| H | 0.56753  | -1.30169 | -0.51042 |
| H | -0.44222 | 1.90220  | 1.73092  |
| H | 1.26961  | 1.70079  | 1.28370  |
| H | 0.14416  | 2.47895  | 0.17053  |
| H | 2.69427  | -2.06083 | 0.80721  |
| H | 5.12441  | -1.75438 | 0.74570  |
| H | 4.60161  | 2.03287  | -1.19430 |
| H | 2.14522  | 1.71011  | -1.15734 |
| H | 8.23471  | -0.07904 | 0.04942  |
| H | 7.09311  | -0.66421 | 1.28227  |
| H | 7.16508  | -1.45214 | -0.32248 |
| H | -4.60414 | 2.52175  | 0.16972  |
| H | -6.95189 | 1.83000  | -0.10310 |
| H | -7.52362 | -0.56265 | -0.37082 |
| H | -5.76050 | -2.27847 | -0.37021 |

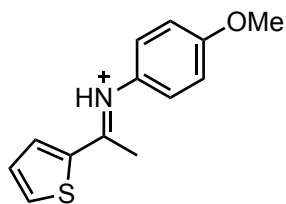

### Hydrogenation *E*-Iminium 13

M06-2X/def2-TZVP Geometry

|   |          |          |          |
|---|----------|----------|----------|
| C | -4.95118 | -0.63532 | -0.39205 |
| S | -3.35641 | -1.19218 | -0.51864 |
| C | -2.73112 | 0.29817  | 0.09279  |
| C | -3.75958 | 1.18173  | 0.36299  |
| C | -5.02677 | 0.64491  | 0.08746  |
| C | -1.33039 | 0.54706  | 0.26833  |
| C | -0.86776 | 1.90048  | 0.69035  |
| N | -0.46412 | -0.41115 | 0.06741  |
| C | 0.96485  | -0.33554 | 0.08242  |
| C | 1.67072  | -1.28266 | 0.82221  |
| C | 3.04519  | -1.25332 | 0.82679  |
| C | 3.73447  | -0.28294 | 0.08680  |
| C | 3.02005  | 0.65078  | -0.66647 |
| C | 1.63462  | 0.61411  | -0.67032 |
| H | -3.60812 | 2.18032  | 0.74532  |

|   |          |          |          |
|---|----------|----------|----------|
| H | -0.86953 | 2.57667  | -0.16703 |
| H | -1.55157 | 2.30352  | 1.43333  |
| H | 0.13633  | 1.86144  | 1.10318  |
| H | -0.83409 | -1.33614 | -0.13130 |
| H | 1.14084  | -2.02965 | 1.40047  |
| H | 3.61965  | -1.97034 | 1.39671  |
| O | 5.06668  | -0.33626 | 0.15610  |
| H | 3.52995  | 1.39278  | -1.26212 |
| H | 1.08163  | 1.31557  | -1.28190 |
| C | 5.82778  | 0.60915  | -0.57955 |
| H | 5.60455  | 1.62614  | -0.25077 |
| H | 6.86792  | 0.37939  | -0.37279 |
| H | 5.63657  | 0.51161  | -1.65006 |
| H | -5.95712 | 1.17259  | 0.23132  |
| H | -5.76440 | -1.28041 | -0.68724 |

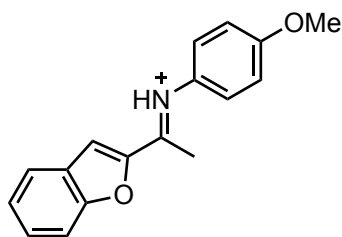

### Hydrogenation *E*-Iminium 14

M06-2X/def2-TZVP Geometry

|   |          |          |          |
|---|----------|----------|----------|
| O | -2.10506 | -0.66526 | 0.12930  |
| C | -1.74955 | 0.62816  | -0.13699 |
| C | -2.84560 | 1.42264  | -0.31384 |
| C | -0.35507 | 0.92072  | -0.17897 |
| C | 0.10666  | 2.30822  | -0.45209 |
| N | 0.47651  | -0.06761 | 0.01316  |
| C | 1.90084  | -0.04097 | 0.07125  |
| C | 2.59950  | -1.04758 | -0.57733 |
| C | 3.98281  | -1.07815 | -0.53067 |
| C | 4.67139  | -0.09443 | 0.18258  |
| C | 3.95516  | 0.90376  | 0.85554  |
| C | 2.58086  | 0.92866  | 0.80681  |
| H | -2.84329 | 2.47832  | -0.53168 |
| H | -0.60736 | 2.81178  | -1.09866 |
| H | 0.17473  | 2.87277  | 0.47979  |
| H | 1.08795  | 2.30200  | -0.92232 |
| H | 0.04780  | -0.98252 | 0.12966  |
| H | 2.06491  | -1.80656 | -1.13565 |
| H | 4.51150  | -1.86404 | -1.04847 |
| O | 6.00082  | -0.03106 | 0.29080  |

|   |          |          |          |
|---|----------|----------|----------|
| H | 4.50797  | 1.63770  | 1.42541  |
| H | 2.03703  | 1.67855  | 1.36488  |
| C | 6.78630  | -1.02229 | -0.35353 |
| H | 6.62804  | -1.00046 | -1.43361 |
| H | 7.81906  | -0.77429 | -0.13139 |
| H | 6.55506  | -2.01476 | 0.03833  |
| C | -3.46471 | -0.69684 | 0.12180  |
| C | -3.97902 | 0.57817  | -0.14724 |
| C | -5.36880 | 0.76463  | -0.19900 |
| C | -6.16967 | -0.33067 | 0.02070  |
| C | -5.61859 | -1.59873 | 0.28882  |
| C | -4.25485 | -1.81087 | 0.34539  |
| H | -5.79172 | 1.73838  | -0.40508 |
| H | -7.24510 | -0.22437 | -0.01123 |
| H | -6.28622 | -2.43339 | 0.45635  |
| H | -3.82805 | -2.78181 | 0.55144  |

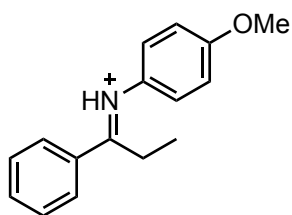

### Hydrogenation *E*-Iminium 15

M06-2X/def2-TZVP Geometry

|   |          |          |          |
|---|----------|----------|----------|
| C | -4.95859 | -0.02005 | -0.78145 |
| C | -3.65524 | 0.42576  | -0.90755 |
| C | -2.64608 | -0.12667 | -0.11243 |
| C | -2.97586 | -1.10417 | 0.83428  |
| C | -4.28328 | -1.53550 | 0.96457  |
| C | -5.27373 | -1.00015 | 0.15092  |
| C | -1.25897 | 0.31968  | -0.25862 |
| C | -0.94935 | 1.71828  | -0.67061 |
| C | -1.42141 | 2.74718  | 0.36516  |
| N | -0.31446 | -0.54181 | -0.01735 |
| C | 1.10188  | -0.33915 | 0.04185  |
| C | 1.92345  | -1.22227 | -0.63780 |
| C | 3.29953  | -1.07150 | -0.58476 |
| C | 3.85192  | -0.03103 | 0.16481  |
| C | 3.01064  | 0.84209  | 0.86693  |
| C | 1.64544  | 0.68635  | 0.81216  |
| O | 5.16098  | 0.20371  | 0.28097  |
| C | 6.07094  | -0.65126 | -0.39463 |

|   |          |          |          |
|---|----------|----------|----------|
| H | -5.73097 | 0.39832  | -1.41231 |
| H | -3.42571 | 1.18330  | -1.64436 |
| H | -2.22488 | -1.48866 | 1.51472  |
| H | -4.53263 | -2.27790 | 1.71058  |
| H | -6.29611 | -1.33963 | 0.25251  |
| H | -1.47845 | 1.89214  | -1.61070 |
| H | 0.11270  | 1.82336  | -0.87672 |
| H | -1.17843 | 3.74784  | 0.01377  |
| H | -2.49802 | 2.68617  | 0.51756  |
| H | -0.93397 | 2.59664  | 1.32809  |
| H | -0.61774 | -1.49816 | 0.14513  |
| H | 1.49366  | -2.02461 | -1.22554 |
| H | 3.92724  | -1.76225 | -1.12731 |
| H | 3.46231  | 1.62480  | 1.46087  |
| H | 1.00108  | 1.34299  | 1.38251  |
| H | 5.97819  | -1.67744 | -0.03324 |
| H | 5.90589  | -0.61761 | -1.47350 |
| H | 7.06161  | -0.27185 | -0.16536 |

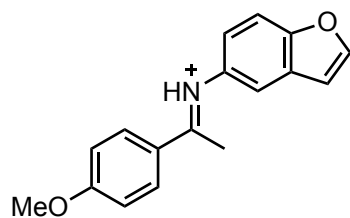

### Hydrogenation *E*-Iminium 16

M06-2X/def2-TZVP Geometry

|   |          |          |          |
|---|----------|----------|----------|
| C | -4.21038 | 1.20025  | -0.53116 |
| C | -2.86192 | 1.39776  | -0.66748 |
| C | -1.93863 | 0.43340  | -0.21863 |
| C | -2.44128 | -0.71497 | 0.41200  |
| C | -3.79387 | -0.92130 | 0.56713  |
| C | -4.69664 | 0.03533  | 0.08243  |
| C | -0.51488 | 0.63664  | -0.38142 |
| C | 0.04487  | 2.00034  | -0.59838 |
| N | 0.28574  | -0.39578 | -0.34757 |
| H | -2.52239 | 2.30289  | -1.15007 |
| H | -1.77052 | -1.44440 | 0.85070  |
| H | -4.14326 | -1.80523 | 1.07890  |
| O | -6.01492 | -0.06704 | 0.17362  |
| H | 1.10146  | 1.97491  | -0.84198 |
| H | -0.49548 | 2.48022  | -1.41322 |

|   |          |          |          |
|---|----------|----------|----------|
| H | -0.11045 | 2.60932  | 0.29390  |
| H | -0.15254 | -1.31004 | -0.33508 |
| H | -4.92550 | 1.92808  | -0.88855 |
| C | -6.58487 | -1.22198 | 0.77937  |
| H | -7.65941 | -1.08543 | 0.72073  |
| H | -6.29697 | -2.12263 | 0.23493  |
| H | -6.27972 | -1.29755 | 1.82421  |
| C | 3.76181  | -1.24781 | -1.29008 |
| C | 2.38206  | -1.16983 | -1.28823 |
| C | 1.72139  | -0.40934 | -0.31642 |
| C | 2.38779  | 0.27514  | 0.68454  |
| H | 4.30030  | -1.82371 | -2.02913 |
| H | 1.80696  | -1.68670 | -2.04544 |
| H | 1.84086  | 0.82331  | 1.44122  |
| C | 4.42444  | -0.54728 | -0.29755 |
| C | 3.77883  | 0.21104  | 0.68953  |
| C | 4.83122  | 0.74533  | 1.51153  |
| C | 5.97659  | 0.28639  | 0.97178  |
| O | 5.75928  | -0.49647 | -0.12129 |
| H | 4.74270  | 1.37810  | 2.37748  |
| H | 7.00986  | 0.42281  | 1.24205  |

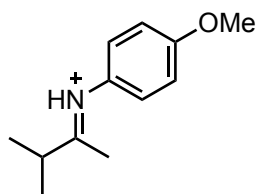

### Hydrogenation *E*-Iminium 17

M06-2X/def2-TZVP Geometry

|   |          |          |          |
|---|----------|----------|----------|
| C | 3.62828  | 0.26133  | 0.25103  |
| C | 2.20976  | -0.19838 | 0.40622  |
| N | 1.25001  | 0.51260  | -0.08354 |
| C | 1.94062  | -1.47209 | 1.12245  |
| C | -0.15785 | 0.23473  | -0.09949 |
| C | -1.02810 | 1.23965  | 0.28735  |
| C | -2.39506 | 1.01859  | 0.26610  |
| C | -2.88797 | -0.21712 | -0.15985 |
| C | -1.99656 | -1.21623 | -0.57291 |
| C | -0.63964 | -0.99255 | -0.54726 |
| O | -4.18256 | -0.53313 | -0.21824 |
| C | -5.14232 | 0.43461  | 0.18107  |
| C | 3.78972  | 1.63919  | -0.37580 |

|   |          |          |          |
|---|----------|----------|----------|
| C | 4.40676  | -0.80766 | -0.53865 |
| H | 4.03117  | 0.27895  | 1.27009  |
| H | 1.51893  | 1.39399  | -0.51365 |
| H | 2.70526  | -1.62625 | 1.88220  |
| H | 0.94849  | -1.48022 | 1.56984  |
| H | 2.00497  | -2.30954 | 0.42312  |
| H | -0.64475 | 2.19617  | 0.62224  |
| H | -3.06232 | 1.80713  | 0.57955  |
| H | -2.40241 | -2.15506 | -0.92398 |
| H | 0.04098  | -1.75626 | -0.89978 |
| H | -6.11103 | -0.03823 | 0.05590  |
| H | -5.00070 | 0.70999  | 1.22818  |
| H | -5.08338 | 1.32253  | -0.45156 |
| H | 3.26329  | 2.41800  | 0.18015  |
| H | 4.84417  | 1.90932  | -0.37758 |
| H | 3.45978  | 1.64899  | -1.41819 |
| H | 4.39370  | -1.77713 | -0.04329 |
| H | 3.99419  | -0.91860 | -1.54288 |
| H | 5.44432  | -0.49151 | -0.63112 |

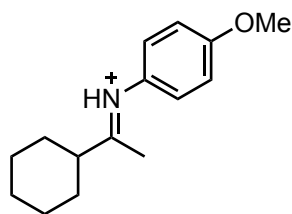

### Hydrogenation *E*-Iminium 18

M06-2X/def2-TZVP Geometry

|   |          |          |          |
|---|----------|----------|----------|
| C | -1.13859 | 0.48793  | 0.58205  |
| C | -0.75787 | 1.78899  | 1.19094  |
| N | -0.24793 | -0.31201 | 0.09712  |
| C | 1.17100  | -0.13165 | -0.00631 |
| C | 1.99072  | -1.17710 | 0.38413  |
| C | 3.36620  | -1.05797 | 0.27705  |
| C | 3.91935  | 0.11606  | -0.23892 |
| C | 3.07773  | 1.15701  | -0.65210 |
| C | 1.71197  | 1.03418  | -0.54185 |
| O | 5.22794  | 0.33182  | -0.38716 |
| C | 6.13755  | -0.68750 | 0.00014  |
| H | -2.94822 | 0.20271  | 1.55895  |
| H | -0.78829 | 2.57501  | 0.43211  |
| H | 0.24813  | 1.75835  | 1.60587  |
| H | -1.48224 | 2.05275  | 1.95959  |
| H | -0.59307 | -1.20182 | -0.25332 |

|   |          |          |          |
|---|----------|----------|----------|
| H | 1.56139  | -2.08708 | 0.78625  |
| H | 3.99300  | -1.87815 | 0.59269  |
| H | 3.52712  | 2.04648  | -1.07172 |
| H | 1.06866  | 1.82815  | -0.89703 |
| H | 7.12841  | -0.29513 | -0.20506 |
| H | 5.97354  | -1.59531 | -0.58408 |
| H | 6.04305  | -0.90584 | 1.06589  |
| C | -4.36317 | -1.60899 | 0.05936  |
| C | -2.86267 | -1.31728 | 0.04037  |
| C | -2.58233 | 0.10273  | 0.52851  |
| C | -3.35231 | 1.13936  | -0.32550 |
| C | -4.84730 | 0.82693  | -0.32411 |
| C | -5.12723 | -0.59789 | -0.78833 |
| H | -4.72241 | -1.57196 | 1.09225  |
| H | -4.53832 | -2.62306 | -0.30000 |
| H | -2.50737 | -1.42892 | -0.99230 |
| H | -2.33758 | -2.04955 | 0.66179  |
| H | -3.18122 | 2.14756  | 0.05472  |
| H | -2.96427 | 1.10265  | -1.34920 |
| H | -5.23875 | 0.96503  | 0.68857  |
| H | -5.36122 | 1.54648  | -0.96227 |
| H | -4.82990 | -0.70463 | -1.83658 |
| H | -6.19681 | -0.80307 | -0.74229 |

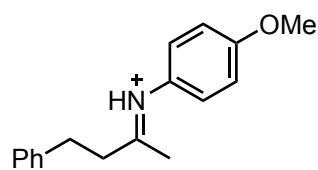

### Hydrogenation *E*-Iminium 19

M06-2X/def2-TZVP Geometry

|   |          |          |          |
|---|----------|----------|----------|
| C | -3.01290 | -2.12842 | -1.07698 |
| C | -3.34883 | -0.78927 | -0.93365 |
| C | -3.12192 | -0.12380 | 0.27218  |
| C | -2.56116 | -0.82922 | 1.33130  |
| C | -2.23623 | -2.17404 | 1.19545  |
| C | -2.45452 | -2.82419 | -0.01056 |
| C | -3.41289 | 1.34926  | 0.39299  |
| C | -2.47687 | 2.19835  | -0.51009 |
| C | -1.05232 | 1.97233  | -0.12883 |
| C | -0.42038 | 2.85729  | 0.87839  |
| N | -0.44456 | 0.95303  | -0.63565 |
| C | 0.88715  | 0.48225  | -0.40937 |
| C | 1.05640  | -0.88456 | -0.19812 |

|   |          |          |          |
|---|----------|----------|----------|
| C | 2.32118  | -1.38402 | 0.00232  |
| C | 3.43131  | -0.52852 | -0.02045 |
| C | 3.25208  | 0.83529  | -0.25911 |
| C | 1.97473  | 1.33613  | -0.45797 |
| O | 4.61658  | -1.10883 | 0.18339  |
| C | 5.78540  | -0.30362 | 0.16048  |
| H | -3.20512 | -2.63462 | -2.01403 |
| H | -3.81250 | -0.26276 | -1.76206 |
| H | -2.38931 | -0.32954 | 2.27814  |
| H | -1.81544 | -2.71239 | 2.03497  |
| H | -2.20643 | -3.87195 | -0.11748 |
| H | -3.31406 | 1.66947  | 1.43142  |
| H | -4.43512 | 1.57154  | 0.08363  |
| H | -2.71468 | 3.25589  | -0.39775 |
| H | -2.63585 | 1.92042  | -1.55280 |
| H | -0.05549 | 3.76382  | 0.38639  |
| H | 0.41019  | 2.37776  | 1.39111  |
| H | -1.18294 | 3.17240  | 1.59139  |
| H | -1.01387 | 0.34637  | -1.22682 |
| H | 0.19194  | -1.53980 | -0.17840 |
| H | 2.48849  | -2.43792 | 0.17712  |
| H | 4.09528  | 1.50762  | -0.30761 |
| H | 1.84038  | 2.38718  | -0.67854 |
| H | 6.61398  | -0.97681 | 0.35552  |
| H | 5.91496  | 0.16358  | -0.81793 |
| H | 5.74358  | 0.46175  | 0.93841  |

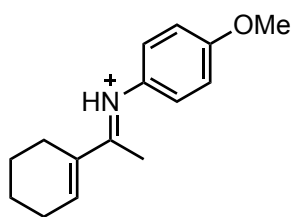

### Hydrogenation *E*-Iminium 20

M06-2X/def2-TZVP Geometry

|   |         |          |          |
|---|---------|----------|----------|
| C | 4.99672 | 0.80949  | -0.06677 |
| C | 3.54824 | 1.06854  | -0.29855 |
| C | 2.58430 | 0.14044  | -0.16083 |
| C | 2.90665 | -1.29256 | 0.20096  |
| C | 4.38937 | -1.60919 | 0.00999  |
| C | 5.25553 | -0.52116 | 0.62947  |
| C | 1.19396 | 0.54484  | -0.30545 |
| C | 0.79750 | 1.88194  | -0.83581 |



|   |          |          |          |
|---|----------|----------|----------|
| N | 0.27319  | -0.31197 | 0.03913  |
| H | 2.31979  | -1.97340 | -0.42422 |
| H | 4.60558  | -1.68198 | -1.05917 |
| H | 1.45368  | 2.16055  | -1.65638 |
| H | -0.23133 | 1.87138  | -1.18500 |
| H | 0.88782  | 2.64206  | -0.05730 |
| H | 0.59932  | -1.22566 | 0.33755  |
| H | 5.41592  | 1.64798  | 0.49441  |
| C | -3.08522 | 1.06783  | 0.79766  |
| C | -1.71608 | 0.94763  | 0.74321  |
| C | -1.14749 | -0.13957 | 0.08309  |
| C | -1.94867 | -1.11461 | -0.48710 |
| H | -3.55488 | 1.89705  | 1.30838  |
| H | -1.08801 | 1.68138  | 1.23144  |
| H | -1.49989 | -1.96360 | -0.98835 |
| C | -3.90560 | 0.09914  | 0.20499  |
| C | -3.32832 | -0.99956 | -0.43477 |
| C | -6.10933 | -0.64630 | -0.25245 |
| O | -5.22072 | 0.30577  | 0.31200  |
| H | -7.10926 | -0.27876 | -0.04626 |
| H | 2.62282  | -1.48388 | 1.24263  |
| H | 5.49520  | 0.84053  | -1.04410 |
| H | 4.60993  | -2.58155 | 0.44832  |
| H | 5.02046  | -0.42804 | 1.69315  |
| H | 6.31095  | -0.77954 | 0.55751  |
| H | 3.28261  | 2.08155  | -0.57830 |
| H | -3.93974 | -1.76310 | -0.89130 |
| H | -5.97507 | -1.62479 | 0.21291  |
| H | -5.96179 | -0.72195 | -1.33162 |

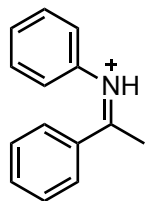

### Hydrogenation Z-Iminium 1

M06-2X/def2-TZVP Geometry

|   |          |         |          |
|---|----------|---------|----------|
| C | -1.53104 | 2.87100 | 0.02583  |
| C | -0.74921 | 1.60390 | -0.04462 |
| N | 0.54692  | 1.70150 | -0.07487 |
| C | -1.45195 | 0.32519 | -0.09475 |
| C | 1.54073  | 0.66814 | 0.06091  |

|   |          |          |          |
|---|----------|----------|----------|
| C | 2.58279  | 0.62813  | -0.85141 |
| C | 3.55516  | -0.35172 | -0.71032 |
| C | 3.47924  | -1.26230 | 0.33421  |
| C | 2.43632  | -1.19369 | 1.25010  |
| C | 1.45864  | -0.22171 | 1.12123  |
| C | -2.66345 | 0.18350  | 0.59050  |
| C | -3.36308 | -1.00797 | 0.51986  |
| C | -2.88508 | -2.04580 | -0.26909 |
| C | -1.70172 | -1.89759 | -0.98423 |
| C | -0.97681 | -0.72569 | -0.88978 |
| H | -0.90634 | 3.74763  | -0.13514 |
| H | -2.34385 | 2.85207  | -0.69824 |
| H | -1.97876 | 2.95215  | 1.01976  |
| H | 0.92338  | 2.64238  | -0.14169 |
| H | 2.62889  | 1.34091  | -1.66579 |
| H | 4.37184  | -0.39958 | -1.41764 |
| H | 2.38891  | -1.89239 | 2.07421  |
| H | 0.64593  | -0.15293 | 1.83259  |
| H | -3.04906 | 0.99057  | 1.19925  |
| H | -4.28661 | -1.12287 | 1.07058  |
| H | -1.34531 | -2.69868 | -1.61730 |
| H | -0.06081 | -0.61607 | -1.45454 |
| H | 4.24143  | -2.02217 | 0.44252  |
| H | -3.44132 | -2.97181 | -0.33523 |

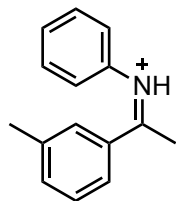

### Hydrogenation Z-Iminium 2

M06-2X/def2-TZVP Geometry

|   |          |          |          |
|---|----------|----------|----------|
| C | 3.18216  | -0.63976 | 0.15870  |
| C | 2.35254  | 0.45854  | 0.32166  |
| C | 1.06458  | 0.48270  | -0.22939 |
| C | 0.61541  | -0.59795 | -0.99543 |
| C | 1.45199  | -1.68155 | -1.19008 |
| C | 2.71159  | -1.70596 | -0.60965 |
| C | 0.25810  | 1.68808  | -0.07679 |
| C | 0.92758  | 3.01982  | -0.00935 |
| N | -1.04099 | 1.67921  | -0.01065 |
| C | -1.95214 | 0.57386  | 0.13099  |

|   |          |          |          |
|---|----------|----------|----------|
| C | -3.03999 | 0.51614  | -0.72522 |
| C | -3.94934 | -0.52151 | -0.58272 |
| C | -3.76602 | -1.47390 | 0.40989  |
| C | -2.67759 | -1.38988 | 1.26997  |
| C | -1.76149 | -0.35909 | 1.13914  |
| C | 4.55119  | -0.68815 | 0.77267  |
| H | 2.70974  | 1.29805  | 0.90502  |
| H | -0.35933 | -0.58017 | -1.46265 |
| H | 1.12227  | -2.51132 | -1.80054 |
| H | 3.35273  | -2.56658 | -0.76285 |
| H | 1.41954  | 3.11881  | 0.96154  |
| H | 1.69575  | 3.09567  | -0.77678 |
| H | 0.21703  | 3.83797  | -0.11143 |
| H | -1.49053 | 2.58971  | -0.01088 |
| H | -3.17029 | 1.26389  | -1.49801 |
| H | -4.80130 | -0.58088 | -1.24610 |
| H | -4.47977 | -2.27880 | 0.52212  |
| H | -2.54609 | -2.12388 | 2.05332  |
| H | -0.91466 | -0.27869 | 1.80828  |
| H | 4.62328  | -1.51157 | 1.48445  |
| H | 5.30968  | -0.85106 | 0.00625  |
| H | 4.78745  | 0.23605  | 1.29642  |

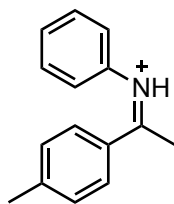

### Hydrogenation Z-Iminium 3

M06-2X/def2-TZVP Geometry

|   |          |          |          |
|---|----------|----------|----------|
| C | 1.82593  | -1.30735 | -0.80433 |
| C | 0.82020  | -0.36808 | -0.75990 |
| C | 1.01595  | 0.83961  | -0.07041 |
| C | 2.24786  | 1.06927  | 0.55451  |
| C | 3.23353  | 0.10212  | 0.53343  |
| C | 3.04306  | -1.10028 | -0.14600 |
| C | 0.01632  | 1.89351  | -0.06823 |
| C | 0.44710  | 3.32220  | -0.01511 |
| N | -1.26660 | 1.67098  | -0.12124 |
| C | -1.99154 | 0.43688  | 0.03011  |
| C | -2.96053 | 0.12365  | -0.90931 |
| C | -3.68908 | -1.04695 | -0.75355 |

|   |          |          |          |
|---|----------|----------|----------|
| C | -3.44710 | -1.87709 | 0.33188  |
| C | -2.48198 | -1.53763 | 1.27288  |
| C | -1.74812 | -0.37181 | 1.13028  |
| H | -0.10283 | -0.55485 | -1.29092 |
| H | 2.43303  | 1.99686  | 1.07955  |
| H | 4.17182  | 0.28578  | 1.04062  |
| H | 0.80668  | 3.54423  | 0.99272  |
| H | -0.37366 | 4.00224  | -0.23476 |
| H | 1.26909  | 3.49734  | -0.70612 |
| H | -1.85566 | 2.49153  | -0.22058 |
| H | -3.13602 | 0.77730  | -1.75483 |
| H | -4.44585 | -1.30645 | -1.48103 |
| H | -4.01908 | -2.78716 | 0.45174  |
| H | -2.30741 | -2.17691 | 2.12748  |
| H | -0.99971 | -0.09168 | 1.86012  |
| H | 1.67435  | -2.22281 | -1.36252 |
| C | 4.10716  | -2.15288 | -0.17675 |
| H | 4.25071  | -2.52842 | -1.18999 |
| H | 5.05643  | -1.77397 | 0.19526  |
| H | 3.81165  | -3.00091 | 0.44490  |

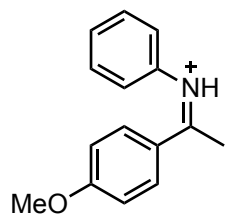

### Hydrogenation *Z*-Iminium 4

M06-2X/def2-TZVP Geometry

|   |          |          |          |
|---|----------|----------|----------|
| C | 1.55848  | -1.08434 | -0.79291 |
| C | 0.47274  | -0.25721 | -0.71679 |
| C | 0.57250  | 1.00827  | -0.09594 |
| C | 1.81770  | 1.39336  | 0.42429  |
| C | 2.90919  | 0.55405  | 0.38469  |
| C | 2.78796  | -0.69951 | -0.22794 |
| C | -0.52081 | 1.94607  | -0.05075 |
| C | -0.24519 | 3.41399  | 0.04435  |
| N | -1.78370 | 1.60481  | -0.09400 |
| C | -2.38871 | 0.30763  | 0.04566  |
| C | -3.30044 | -0.10483 | -0.91263 |
| C | -3.91186 | -1.34209 | -0.76691 |
| C | -3.61096 | -2.14194 | 0.32641  |

|   |          |          |          |
|---|----------|----------|----------|
| C | -2.70472 | -1.70540 | 1.28575  |
| C | -2.08973 | -0.47139 | 1.15374  |
| H | -0.45253 | -0.57303 | -1.17645 |
| H | 1.93509  | 2.36056  | 0.89427  |
| H | 3.84496  | 0.87452  | 0.81677  |
| H | 0.08157  | 3.65040  | 1.05972  |
| H | -1.13660 | 4.00309  | -0.16210 |
| H | 0.54838  | 3.70244  | -0.64102 |
| H | -2.44615 | 2.36915  | -0.16527 |
| H | -3.52038 | 0.52557  | -1.76523 |
| H | -4.62308 | -1.67781 | -1.50909 |
| H | -4.09066 | -3.10487 | 0.43778  |
| H | -2.48408 | -2.32282 | 2.14582  |
| H | -1.38738 | -0.11573 | 1.89652  |
| H | 1.50196  | -2.04323 | -1.28918 |
| O | 3.77263  | -1.57864 | -0.33384 |
| C | 5.05354  | -1.25964 | 0.20007  |
| H | 5.68064  | -2.12072 | -0.00475 |
| H | 4.99005  | -1.09663 | 1.27693  |
| H | 5.46498  | -0.37751 | -0.29256 |

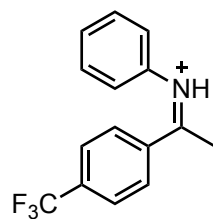

### Hydrogenation Z-Iminium 5

M06-2X/def2-TZVP Geometry

|   |          |          |          |
|---|----------|----------|----------|
| C | 1.36566  | 3.53781  | -0.10858 |
| C | 1.39163  | 2.04897  | -0.08986 |
| N | 2.54827  | 1.46345  | -0.13693 |
| C | 0.12849  | 1.30743  | -0.04874 |
| C | 2.87743  | 0.07093  | 0.03139  |
| C | 3.72034  | -0.51604 | -0.89899 |
| C | 4.06589  | -1.84942 | -0.73696 |
| C | 3.57788  | -2.56702 | 0.34617  |
| C | 2.74882  | -1.95474 | 1.27856  |
| C | 2.39369  | -0.62434 | 1.12899  |
| C | -0.94039 | 1.82133  | 0.68630  |
| C | -2.15727 | 1.15840  | 0.69980  |

|   |          |          |          |
|---|----------|----------|----------|
| C | -2.31313 | 0.00922  | -0.05583 |
| C | -1.26595 | -0.49186 | -0.82257 |
| C | -0.04272 | 0.14429  | -0.81047 |
| C | -3.63013 | -0.73333 | -0.08041 |
| F | -4.54258 | -0.15156 | 0.69136  |
| F | -4.11153 | -0.78982 | -1.32233 |
| F | -3.46636 | -1.98715 | 0.34479  |
| H | 0.65853  | 3.88784  | -0.85988 |
| H | 1.01326  | 3.89793  | 0.86111  |
| H | 2.34987  | 3.96441  | -0.29221 |
| H | 3.35214  | 2.07164  | -0.26640 |
| H | 4.09053  | 0.05393  | -1.74262 |
| H | 4.71845  | -2.32363 | -1.45727 |
| H | 2.38602  | -2.51119 | 2.13216  |
| H | 1.75791  | -0.13288 | 1.85403  |
| H | -0.82770 | 2.72552  | 1.26935  |
| H | -2.98117 | 1.53964  | 1.28688  |
| H | -1.41372 | -1.37951 | -1.42448 |
| H | 0.76796  | -0.24527 | -1.41122 |
| H | 3.85273  | -3.60566 | 0.47174  |

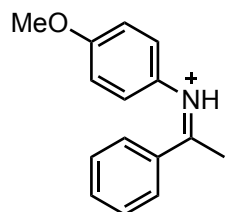

### Hydrogenation Z-Iminium 6

M06-2X/def2-TZVP Geometry

|   |          |          |          |
|---|----------|----------|----------|
| C | 2.84308  | 2.59725  | 0.04742  |
| C | 1.81072  | 1.52382  | -0.02809 |
| N | 0.56555  | 1.89520  | -0.05317 |
| C | 2.23228  | 0.12641  | -0.09252 |
| C | -0.63270 | 1.11681  | 0.07064  |
| C | -1.69394 | 1.40538  | -0.76797 |
| C | -2.88046 | 0.69655  | -0.65557 |
| C | -2.99691 | -0.29959 | 0.31450  |
| C | -1.91809 | -0.56744 | 1.17032  |
| C | -0.74421 | 0.13713  | 1.05487  |
| O | -4.09112 | -1.03795 | 0.51244  |
| C | -5.23116 | -0.80206 | -0.30005 |
| C | 3.38913  | -0.26805 | 0.58687  |
| C | 3.83472  | -1.57505 | 0.49613  |
| C | 3.15723  | -2.48303 | -0.30588 |

|   |          |          |          |
|---|----------|----------|----------|
| C | 2.02720  | -2.08784 | -1.01378 |
| C | 1.55376  | -0.79488 | -0.90009 |
| H | 3.62263  | 2.42062  | -0.69208 |
| H | 2.41393  | 3.58787  | -0.09146 |
| H | 3.31381  | 2.56781  | 1.03328  |
| H | 0.40683  | 2.89637  | -0.11496 |
| H | -1.59948 | 2.17699  | -1.52295 |
| H | -3.70014 | 0.92897  | -1.31853 |
| H | -2.04228 | -1.32714 | 1.92980  |
| H | 0.07987  | -0.06351 | 1.72704  |
| H | -5.98851 | -1.50027 | 0.04164  |
| H | -5.59191 | 0.22076  | -0.17357 |
| H | -5.00427 | -0.99191 | -1.35118 |
| H | 3.93167  | 0.43560  | 1.20413  |
| H | 4.71633  | -1.88101 | 1.04263  |
| H | 3.51572  | -3.50072 | -0.38845 |
| H | 1.51522  | -2.79135 | -1.65609 |
| H | 0.67673  | -0.49428 | -1.45741 |

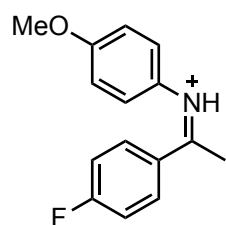

### Hydrogenation Z-Iminium 7

M06-2X/def2-TZVP Geometry

|   |          |          |          |
|---|----------|----------|----------|
| C | 1.18878  | 0.41079  | -0.94750 |
| C | 2.30226  | -0.41245 | -0.92812 |
| C | 3.25555  | -0.26767 | 0.08362  |
| C | 3.08215  | 0.71593  | 1.06562  |
| C | 1.97425  | 1.53276  | 1.04162  |
| C | 1.02259  | 1.36565  | 0.04028  |
| N | -0.11726 | 2.23757  | 0.02023  |
| C | -1.38027 | 1.94971  | -0.10357 |
| C | -1.90826 | 0.59469  | -0.01412 |
| C | -2.31525 | 3.09053  | -0.33292 |
| C | -3.07290 | 0.27119  | -0.72247 |
| C | -3.63185 | -0.98689 | -0.62439 |
| C | -3.03912 | -1.90566 | 0.22581  |
| C | -1.90816 | -1.60780 | 0.97298  |
| C | -1.33668 | -0.36134 | 0.83982  |

|   |          |          |          |
|---|----------|----------|----------|
| F | -3.57545 | -3.10788 | 0.33890  |
| O | 4.36051  | -1.00934 | 0.18936  |
| C | 4.61184  | -2.00632 | -0.78962 |
| H | 0.45309  | 0.30511  | -1.73476 |
| H | 2.42631  | -1.14867 | -1.70805 |
| H | 3.83772  | 0.81912  | 1.83220  |
| H | 1.84065  | 2.28996  | 1.80484  |
| H | 0.10889  | 3.22720  | 0.04944  |
| H | -3.19081 | 2.99863  | 0.30716  |
| H | -1.83188 | 4.05104  | -0.16384 |
| H | -2.65790 | 3.06663  | -1.37058 |
| H | -3.53841 | 0.99765  | -1.37495 |
| H | -4.51678 | -1.26372 | -1.18013 |
| H | -1.50115 | -2.35145 | 1.64390  |
| H | -0.46049 | -0.12074 | 1.42559  |
| H | 4.71276  | -1.55899 | -1.78059 |
| H | 5.54856  | -2.47391 | -0.50374 |
| H | 3.81563  | -2.75379 | -0.79533 |

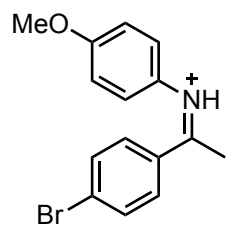

### Hydrogenation Z-Iminium 8

M06-2X/def2-TZVP Geometry

|   |          |          |          |
|---|----------|----------|----------|
| C | -1.59846 | -0.55662 | -0.78857 |
| C | -0.59514 | 0.38874  | -0.76354 |
| C | -0.76664 | 1.58512  | -0.05287 |
| C | -1.97247 | 1.81150  | 0.62062  |
| C | -2.96533 | 0.85125  | 0.62886  |
| C | -2.77456 | -0.33014 | -0.07797 |
| C | 0.23922  | 2.63960  | -0.08297 |
| C | -0.19239 | 4.06793  | -0.05005 |
| N | 1.51792  | 2.40873  | -0.15192 |
| C | 2.24164  | 1.18131  | 0.01167  |
| C | 3.26196  | 0.89003  | -0.87517 |
| C | 3.99856  | -0.27582 | -0.72641 |
| C | 3.70854  | -1.14347 | 0.32733  |
| C | 2.68389  | -0.82354 | 1.23096  |



|    |          |          |          |
|----|----------|----------|----------|
| C  | 1.95687  | 0.33225  | 1.07922  |
| H  | 0.31230  | 0.20602  | -1.32246 |
| H  | -2.13540 | 2.73258  | 1.16411  |
| H  | -3.88586 | 1.01724  | 1.17006  |
| Br | -4.12279 | -1.63188 | -0.08690 |
| H  | -1.02525 | 4.22843  | -0.73201 |
| H  | -0.53753 | 4.31085  | 0.95817  |
| H  | 0.62410  | 4.74456  | -0.29537 |
| H  | 2.10561  | 3.22691  | -0.27976 |
| H  | 3.48244  | 1.56278  | -1.69531 |
| H  | 4.78980  | -0.49393 | -1.42750 |
| O  | 4.35352  | -2.28794 | 0.56328  |
| H  | 2.49514  | -1.49976 | 2.05333  |
| H  | 1.17593  | 0.58202  | 1.78565  |
| C  | 5.41715  | -2.66297 | -0.29926 |
| H  | 5.78857  | -3.60910 | 0.08052  |
| H  | 5.05851  | -2.79353 | -1.32220 |
| H  | 6.21552  | -1.91875 | -0.27479 |
| H  | -1.47678 | -1.46915 | -1.35471 |

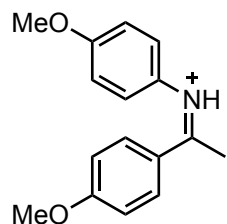

### Hydrogenation Z-Iminium 9

M06-2X/def2-TZVP Geometry

|   |          |          |          |
|---|----------|----------|----------|
| C | -1.38292 | 3.59164  | 0.04469  |
| C | -0.70405 | 2.26103  | -0.04880 |
| N | 0.60303  | 2.28959  | -0.09000 |
| C | -1.49284 | 1.05297  | -0.09509 |
| C | 1.55098  | 1.22311  | 0.05059  |
| C | 2.58600  | 1.12309  | -0.85999 |
| C | 3.53293  | 0.11707  | -0.72810 |
| C | 3.43626  | -0.78548 | 0.33036  |
| C | 2.39016  | -0.66178 | 1.25578  |
| C | 1.45663  | 0.33856  | 1.12230  |
| O | 4.29275  | -1.78834 | 0.54994  |
| C | 5.38687  | -1.95379 | -0.33802 |
| C | -2.79648 | 1.07556  | 0.42054  |

|   |          |          |          |
|---|----------|----------|----------|
| C | -3.61403 | -0.03328 | 0.37343  |
| C | -3.14834 | -1.20136 | -0.24071 |
| C | -1.85861 | -1.22834 | -0.79985 |
| C | -1.04408 | -0.13287 | -0.71728 |
| H | -2.22268 | 3.64446  | -0.64468 |
| H | -1.76883 | 3.72741  | 1.05777  |
| H | -0.69265 | 4.40835  | -0.15855 |
| H | 1.01826  | 3.21186  | -0.16233 |
| H | 2.65564  | 1.82081  | -1.68584 |
| H | 4.33396  | 0.04971  | -1.44861 |
| H | 2.34813  | -1.35976 | 2.08065  |
| H | 0.65556  | 0.43841  | 1.84359  |
| H | 5.03636  | -2.15173 | -1.35333 |
| H | 6.02928  | -1.07080 | -0.33101 |
| H | 5.94204  | -2.81116 | 0.02905  |
| H | -4.60393 | 0.01554  | 0.80120  |
| H | -1.53575 | -2.13336 | -1.29587 |
| H | -0.06380 | -0.17982 | -1.16925 |
| H | -3.17957 | 1.97108  | 0.89125  |
| C | -5.16877 | -2.37309 | 0.17842  |
| H | -5.15477 | -2.20547 | 1.25664  |
| H | -5.80931 | -1.63706 | -0.31015 |
| H | -5.53209 | -3.37341 | -0.03277 |
| O | -3.84967 | -2.32046 | -0.35336 |

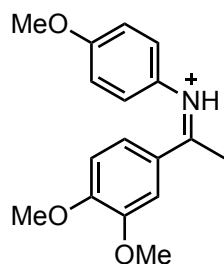

### Hydrogenation Z-Iminium 10

M06-2X/def2-TZVP Geometry

|   |          |          |          |
|---|----------|----------|----------|
| C | -1.21107 | 3.93904  | -0.03053 |
| C | -0.55271 | 2.59792  | 0.06366  |
| N | 0.75130  | 2.61124  | 0.19029  |
| C | -1.34728 | 1.39602  | 0.01479  |
| C | 1.68730  | 1.53076  | 0.06738  |
| C | 2.61135  | 1.31487  | 1.08408  |
| C | 3.51645  | 0.28151  | 0.97176  |
| C | 3.50970  | -0.54219 | -0.15992 |

|   |          |          |          |
|---|----------|----------|----------|
| C | 2.58740  | -0.30657 | -1.18213 |
| C | 1.68201  | 0.73587  | -1.06482 |
| O | 4.42119  | -1.52168 | -0.17618 |
| C | 4.48474  | -2.37205 | -1.30967 |
| C | -0.92110 | 0.18063  | 0.60162  |
| C | -1.71504 | -0.93709 | 0.55380  |
| C | -2.97543 | -0.87816 | -0.11158 |
| C | -3.39862 | 0.32045  | -0.67582 |
| C | -2.60088 | 1.44814  | -0.59569 |
| O | -3.66122 | -2.00805 | -0.12419 |
| O | -1.40918 | -2.12432 | 1.08890  |
| C | -4.93457 | -2.03363 | -0.75711 |
| C | -0.16227 | -2.25133 | 1.74775  |
| H | -2.10863 | 3.97302  | 0.58214  |
| H | -0.53463 | 4.73662  | 0.27166  |
| H | -1.49995 | 4.12484  | -1.06773 |
| H | 1.17214  | 3.52501  | 0.31689  |
| H | 2.61246  | 1.94558  | 1.96473  |
| H | 4.24721  | 0.09027  | 1.74562  |
| H | 2.57589  | -0.91604 | -2.07341 |
| H | 0.96556  | 0.92095  | -1.85521 |
| H | 5.28238  | -3.07986 | -1.10771 |
| H | 3.54369  | -2.90977 | -1.44578 |
| H | 4.72087  | -1.80144 | -2.21031 |
| H | 0.02020  | 0.13285  | 1.12449  |
| H | -4.35427 | 0.37985  | -1.17425 |
| H | -2.95962 | 2.36520  | -1.04197 |
| H | -5.30105 | -3.04808 | -0.64058 |
| H | -5.61884 | -1.33546 | -0.27193 |
| H | -4.84043 | -1.79319 | -1.81761 |
| H | -0.09872 | -3.28541 | 2.07140  |
| H | 0.66327  | -2.02472 | 1.06625  |
| H | -0.11282 | -1.59167 | 2.61774  |

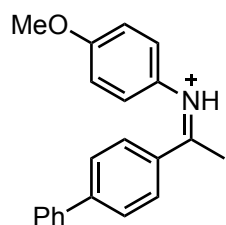

### Hydrogenation Z-Iminium 11

M06-2X/def2-TZVP Geometry

|   |          |         |          |
|---|----------|---------|----------|
| C | -0.93201 | 4.20451 | -0.19417 |
|---|----------|---------|----------|

|   |          |          |          |
|---|----------|----------|----------|
| C | -1.09776 | 2.71930  | -0.17248 |
| N | -2.32217 | 2.27168  | -0.22307 |
| C | 0.07536  | 1.86709  | -0.11102 |
| C | -2.82708 | 0.94640  | -0.00957 |
| C | -3.73990 | 0.42959  | -0.91015 |
| C | -4.26548 | -0.83979 | -0.71549 |
| C | -3.87270 | -1.58365 | 0.39715  |
| C | -2.95982 | -1.03842 | 1.31192  |
| C | -2.44287 | 0.21969  | 1.11477  |
| O | -4.31404 | -2.81282 | 0.67987  |
| C | -5.25152 | -3.41879 | -0.19630 |
| C | 1.25039  | 2.36696  | 0.46850  |
| C | 2.39846  | 1.60485  | 0.49853  |
| C | 2.43370  | 0.33359  | -0.08456 |
| C | 1.26746  | -0.14605 | -0.69579 |
| C | 0.10606  | 0.59302  | -0.70007 |
| H | -0.13245 | 4.48976  | -0.87466 |
| H | -1.85406 | 4.70926  | -0.47697 |
| H | -0.65702 | 4.54652  | 0.80666  |
| H | -3.03901 | 2.97334  | -0.37575 |
| H | -4.03726 | 1.00667  | -1.77762 |
| H | -4.97431 | -1.23353 | -1.42842 |
| H | -2.68715 | -1.62614 | 2.17775  |
| H | -1.74367 | 0.64091  | 1.82574  |
| H | -4.82909 | -3.53424 | -1.19673 |
| H | -5.46265 | -4.39663 | 0.22485  |
| H | -6.17207 | -2.83342 | -0.24425 |
| H | 3.29525  | 2.01193  | 0.94589  |
| H | 1.27064  | -1.12718 | -1.15140 |
| H | -0.77248 | 0.18862  | -1.18266 |
| H | 1.26655  | 3.35463  | 0.90994  |
| C | 6.00120  | -1.99858 | -0.03481 |
| C | 5.68912  | -1.18234 | 1.04412  |
| C | 4.53318  | -0.41977 | 1.02632  |
| C | 3.66662  | -0.47296 | -0.06725 |
| C | 3.98757  | -1.30108 | -1.14461 |
| C | 5.14993  | -2.05360 | -1.13026 |
| H | 6.90670  | -2.59066 | -0.02239 |
| H | 6.34497  | -1.14438 | 1.90367  |
| H | 4.28517  | 0.19490  | 1.88277  |
| H | 3.34376  | -1.33017 | -2.01473 |
| H | 5.39623  | -2.67915 | -1.97787 |

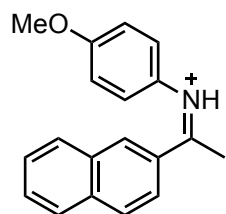

### Hydrogenation Z-Iminium 12

M06-2X/def2-TZVP Geometry

|   |          |          |          |
|---|----------|----------|----------|
| C | -0.90074 | 3.64024  | -0.01671 |
| C | -0.26161 | 2.29285  | -0.10774 |
| N | 1.04101  | 2.26298  | -0.08699 |
| C | -1.09146 | 1.10488  | -0.23432 |
| C | 1.94355  | 1.16160  | 0.06274  |
| C | 3.10150  | 1.15786  | -0.69417 |
| C | 4.02644  | 0.13583  | -0.54631 |
| C | 3.78461  | -0.88134 | 0.37743  |
| C | 2.61428  | -0.85614 | 1.14976  |
| C | 1.70059  | 0.15962  | 1.00013  |
| O | 4.60867  | -1.90788 | 0.60430  |
| C | 5.83313  | -1.96930 | -0.11077 |
| C | -0.67404 | -0.02168 | -1.00307 |
| C | -1.50922 | -1.08350 | -1.15824 |
| C | -2.78896 | -1.11416 | -0.54347 |
| C | -3.20994 | 0.00577  | 0.22145  |
| C | -2.34729 | 1.11173  | 0.33862  |
| C | -3.66098 | -2.21465 | -0.67887 |
| C | -4.89050 | -2.19880 | -0.07809 |
| C | -5.30866 | -1.08632 | 0.68462  |
| C | -4.48727 | -0.00585 | 0.83240  |
| H | -0.17278 | 4.44126  | -0.13294 |
| H | -1.68358 | 3.74115  | -0.76579 |
| H | -1.36396 | 3.75082  | 0.96671  |
| H | 1.49872  | 3.16846  | -0.11345 |
| H | 3.28566  | 1.94723  | -1.41333 |
| H | 4.92375  | 0.14473  | -1.14638 |
| H | 2.46068  | -1.64313 | 1.87520  |
| H | 0.80623  | 0.18246  | 1.60911  |
| H | 6.44970  | -1.09390 | 0.10368  |
| H | 6.33707  | -2.86485 | 0.23848  |
| H | 5.65247  | -2.04596 | -1.18497 |
| H | 0.28892  | -0.01713 | -1.49391 |
| H | -1.20521 | -1.92657 | -1.76619 |
| H | -2.68945 | 1.96417  | 0.91285  |
| H | -3.34493 | -3.06869 | -1.26477 |

|   |          |          |          |
|---|----------|----------|----------|
| H | -5.55481 | -3.04619 | -0.18632 |
| H | -6.28514 | -1.09600 | 1.14998  |
| H | -4.80034 | 0.85247  | 1.41429  |

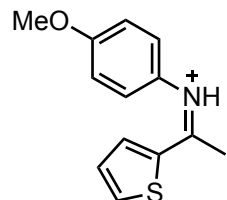

### Hydrogenation Z-Iminium 13

M06-2X/def2-TZVP Geometry

|   |          |          |          |
|---|----------|----------|----------|
| C | 2.16034  | 2.52564  | 0.05749  |
| S | 1.00105  | 1.30092  | 0.05666  |
| C | 2.22619  | 0.07790  | -0.04628 |
| C | 3.48746  | 0.66363  | -0.07545 |
| C | 3.45013  | 2.05742  | -0.01578 |
| C | 2.02442  | -1.33309 | -0.10091 |
| C | 3.21700  | -2.23442 | -0.20399 |
| N | 0.85493  | -1.91665 | -0.06852 |
| C | -0.43150 | -1.28168 | 0.04070  |
| C | -1.12912 | -0.95093 | -1.10681 |
| C | -2.36381 | -0.32742 | -1.00791 |
| C | -2.89614 | -0.04694 | 0.25234  |
| C | -2.18355 | -0.40105 | 1.40603  |
| C | -0.95881 | -1.01979 | 1.30233  |
| H | 4.40480  | 0.09665  | -0.13762 |
| H | 3.86757  | -2.08850 | 0.65786  |
| H | 2.91948  | -3.27974 | -0.24352 |
| H | 3.78555  | -1.99760 | -1.10265 |
| H | 0.85671  | -2.92926 | -0.11855 |
| H | -0.70706 | -1.16698 | -2.08032 |
| H | -2.90037 | -0.07149 | -1.90902 |
| O | -4.07433 | 0.54857  | 0.45751  |
| H | -2.62267 | -0.18255 | 2.36964  |
| H | -0.40392 | -1.29216 | 2.19134  |
| C | -4.86099 | 0.91146  | -0.66661 |
| H | -5.12384 | 0.03091  | -1.25610 |
| H | -5.76211 | 1.36390  | -0.26565 |
| H | -4.33412 | 1.63541  | -1.29161 |
| H | 4.32109  | 2.69434  | -0.02541 |
| H | 1.84235  | 3.55606  | 0.11366  |

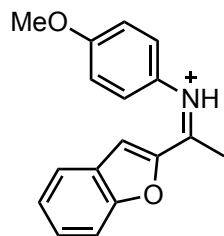

### Hydrogenation Z-Iminium 14

M06-2X/def2-TZVP Geometry

|   |          |          |          |
|---|----------|----------|----------|
| O | 2.65184  | 1.10503  | -0.06759 |
| C | 1.28029  | 1.03757  | -0.03904 |
| C | 0.85944  | -0.27143 | 0.00800  |
| C | 0.64115  | 2.30967  | -0.07926 |
| C | 1.49712  | 3.52769  | -0.16274 |
| N | -0.65586 | 2.46478  | -0.04973 |
| C | -1.63918 | 1.42116  | 0.05469  |
| C | -2.20739 | 0.90093  | -1.09269 |
| C | -3.13557 | -0.12704 | -0.99885 |
| C | -3.49074 | -0.62378 | 0.25655  |
| C | -2.91016 | -0.08084 | 1.41092  |
| C | -1.99110 | 0.93968  | 1.31191  |
| H | -0.15848 | -0.62154 | 0.03866  |
| H | 2.16485  | 3.56100  | 0.69861  |
| H | 2.12803  | 3.46943  | -1.04977 |
| H | 0.89787  | 4.43436  | -0.19650 |
| H | -0.99676 | 3.41856  | -0.09430 |
| H | -1.92242 | 1.28667  | -2.06340 |
| H | -3.57608 | -0.52492 | -1.90061 |
| O | -4.37354 | -1.60756 | 0.45727  |
| H | -3.20980 | -0.47545 | 2.37206  |
| H | -1.53957 | 1.36036  | 2.20158  |
| C | -5.02546 | -2.17812 | -0.66663 |
| H | -4.30327 | -2.64657 | -1.33858 |
| H | -5.69656 | -2.93304 | -0.27009 |
| H | -5.60070 | -1.42277 | -1.20568 |
| C | 3.10371  | -0.16528 | -0.03729 |
| C | 2.03156  | -1.06696 | 0.00906  |
| C | 2.28846  | -2.44947 | 0.04693  |
| C | 3.59890  | -2.85405 | 0.03627  |
| C | 4.65584  | -1.91841 | -0.01091 |
| C | 4.43452  | -0.55851 | -0.04841 |

|   |         |          |          |
|---|---------|----------|----------|
| H | 1.47766 | -3.16411 | 0.08426  |
| H | 3.83727 | -3.90821 | 0.06495  |
| H | 5.67403 | -2.28439 | -0.01745 |
| H | 5.24018 | 0.16042  | -0.08413 |

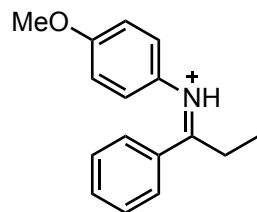

### Hydrogenation Z-Iminium 15

M06-2X/def2-TZVP Geometry

|   |          |          |          |
|---|----------|----------|----------|
| C | -3.28774 | -2.34614 | -0.55091 |
| C | -3.05619 | -0.98509 | -0.66173 |
| C | -2.03913 | -0.38846 | 0.08657  |
| C | -1.28263 | -1.16243 | 0.97363  |
| C | -1.54395 | -2.51317 | 1.10306  |
| C | -2.53689 | -3.10819 | 0.33329  |
| C | -1.82579 | 1.05997  | 0.01501  |
| C | -3.01573 | 1.96835  | -0.01743 |
| C | -2.73575 | 3.46211  | 0.00073  |
| N | -0.64251 | 1.59026  | 0.02405  |
| C | 0.64352  | 0.96481  | -0.09513 |
| C | 1.66482  | 1.39515  | 0.73163  |
| C | 2.92635  | 0.82750  | 0.62967  |
| C | 3.15780  | -0.16876 | -0.31937 |
| C | 2.11783  | -0.57763 | -1.16660 |
| C | 0.86899  | -0.01459 | -1.05979 |
| O | 4.33102  | -0.78054 | -0.50230 |
| C | 5.43069  | -0.40355 | 0.31211  |
| H | -4.06048 | -2.80947 | -1.14909 |
| H | -3.64998 | -0.40035 | -1.35155 |
| H | -0.50813 | -0.70385 | 1.57455  |
| H | -0.97147 | -3.10522 | 1.80408  |
| H | -2.72890 | -4.16892 | 0.42803  |
| H | -3.65344 | 1.67249  | 0.81997  |
| H | -3.58506 | 1.69917  | -0.91266 |
| H | -2.21542 | 3.76817  | 0.91084  |
| H | -2.15895 | 3.78192  | -0.86931 |
| H | -3.67716 | 4.00661  | -0.02297 |
| H | -0.61252 | 2.60430  | 0.08167  |
| H | 1.48279  | 2.16578  | 1.47150  |



|   |         |          |          |
|---|---------|----------|----------|
| H | 3.71305 | 1.16797  | 1.28572  |
| H | 2.32766 | -1.33402 | -1.91044 |
| H | 0.07238 | -0.32591 | -1.72259 |
| H | 5.21706 | -0.59685 | 1.36546  |
| H | 6.26466 | -1.01922 | -0.00911 |
| H | 5.67617 | 0.65057  | 0.16728  |

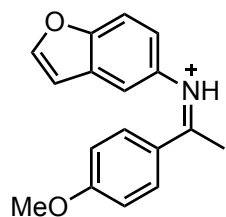

### Hydrogenation Z-Iminium 16

M06-2X/def2-TZVP Geometry

|   |          |          |          |
|---|----------|----------|----------|
| C | -3.72584 | 0.04392  | 0.29398  |
| C | -2.88551 | 1.13493  | 0.34028  |
| C | -1.56076 | 1.06482  | -0.11608 |
| C | -1.11397 | -0.15203 | -0.67819 |
| C | -1.94998 | -1.23071 | -0.76116 |
| C | -3.26207 | -1.15509 | -0.26068 |
| C | -0.74387 | 2.25261  | -0.06946 |
| C | -1.38889 | 3.60296  | -0.04026 |
| N | 0.56417  | 2.24518  | -0.05383 |
| H | -3.26669 | 2.05409  | 0.76455  |
| H | -0.11708 | -0.23558 | -1.08582 |
| H | -1.62804 | -2.15876 | -1.21284 |
| O | -3.98570 | -2.26000 | -0.36702 |
| H | -0.66885 | 4.39469  | -0.23788 |
| H | -1.80900 | 3.77644  | 0.95323  |
| H | -2.19919 | 3.65930  | -0.76340 |
| H | 1.01100  | 3.15237  | -0.12662 |
| H | -4.73163 | 0.12825  | 0.67651  |
| C | -5.32890 | -2.26147 | 0.10434  |
| H | -5.92666 | -1.52850 | -0.43942 |
| H | -5.35983 | -2.05476 | 1.17517  |
| H | -5.70765 | -3.25960 | -0.08810 |
| C | 2.17454  | -0.68700 | 1.55111  |
| C | 1.30600  | 0.35722  | 1.30232  |
| C | 1.47163  | 1.14986  | 0.16046  |
| C | 2.49634  | 0.96124  | -0.74735 |
| H | 2.07758  | -1.31380 | 2.42617  |
| H | 0.49499  | 0.56868  | 1.98623  |
| H | 2.59434  | 1.59864  | -1.61710 |

|   |         |          |          |
|---|---------|----------|----------|
| C | 3.19201 | -0.88357 | 0.63216  |
| C | 3.38240 | -0.08753 | -0.50534 |
| C | 4.54295 | -0.62700 | -1.16101 |
| C | 4.94012 | -1.66108 | -0.39479 |
| O | 4.14115 | -1.83798 | 0.69430  |
| H | 5.01043 | -0.28889 | -2.06948 |
| H | 5.75640 | -2.35740 | -0.48476 |

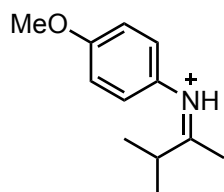

### Hydrogenation Z-Iminium 17

M06-2X/def2-TZVP Geometry

|   |          |          |          |
|---|----------|----------|----------|
| C | -3.61466 | 1.38098  | -0.46305 |
| C | -2.37421 | 0.60464  | -0.19513 |
| N | -1.24292 | 1.13238  | -0.53286 |
| C | -2.46573 | -0.72775 | 0.47414  |
| C | 0.09201  | 0.61911  | -0.38133 |
| C | 1.04117  | 1.44414  | 0.19678  |
| C | 2.34657  | 1.00423  | 0.34205  |
| C | 2.69938  | -0.26994 | -0.10754 |
| C | 1.73411  | -1.08424 | -0.71429 |
| C | 0.43922  | -0.64231 | -0.85683 |
| O | 3.92381  | -0.79146 | -0.01369 |
| C | 4.95339  | -0.01681 | 0.58343  |
| C | -3.02806 | -1.76649 | -0.51199 |
| C | -3.34832 | -0.63940 | 1.72527  |
| H | -4.37727 | 0.73275  | -0.89475 |
| H | -4.00828 | 1.74775  | 0.48810  |
| H | -3.44183 | 2.22672  | -1.12569 |
| H | -1.28870 | 2.05796  | -0.95179 |
| H | -1.46214 | -1.02963 | 0.77176  |
| H | 0.76585  | 2.43104  | 0.54916  |
| H | 3.07475  | 1.65563  | 0.80131  |
| H | 2.03709  | -2.05674 | -1.07714 |
| H | -0.29335 | -1.26440 | -1.35318 |
| H | 5.12662  | 0.90027  | 0.01666  |
| H | 4.70490  | 0.22414  | 1.61907  |
| H | 5.84448  | -0.63553 | 0.55727  |
| H | -2.46575 | -1.80764 | -1.44454 |
| H | -2.98319 | -2.74866 | -0.04322 |
| H | -4.07147 | -1.55759 | -0.74922 |

|   |          |          |         |
|---|----------|----------|---------|
| H | -2.99363 | 0.12195  | 2.42048 |
| H | -4.38721 | -0.42934 | 1.46963 |
| H | -3.32016 | -1.60058 | 2.23659 |

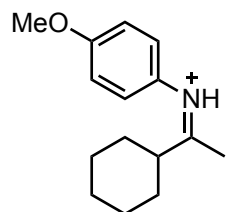

### Hydrogenation *Z*-Iminium 18

M06-2X/def2-TZVP Geometry

|   |          |          |          |
|---|----------|----------|----------|
| C | -1.46865 | 1.58326  | -0.13941 |
| C | -2.51151 | 2.64118  | -0.21276 |
| N | -0.23079 | 1.94310  | -0.25722 |
| C | 0.94923  | 1.11734  | -0.23024 |
| C | 1.92062  | 1.37552  | 0.71967  |
| C | 3.07711  | 0.61137  | 0.75049  |
| C | 3.25703  | -0.40984 | -0.18440 |
| C | 2.27271  | -0.64628 | -1.15257 |
| C | 1.12719  | 0.11554  | -1.17958 |
| O | 4.33060  | -1.20218 | -0.23905 |
| C | 5.37278  | -1.00533 | 0.70487  |
| H | -0.95858 | -0.40525 | 0.32807  |
| H | -2.11868 | 3.58955  | -0.57393 |
| H | -2.93248 | 2.78479  | 0.78536  |
| H | -3.32795 | 2.31657  | -0.85786 |
| H | -0.05714 | 2.93682  | -0.38342 |
| H | 1.77807  | 2.16367  | 1.44889  |
| H | 3.82488  | 0.81753  | 1.50144  |
| H | 2.44218  | -1.42798 | -1.88025 |
| H | 0.38063  | -0.05160 | -1.94477 |
| H | 5.80600  | -0.00841 | 0.60109  |
| H | 6.12473  | -1.75469 | 0.47922  |
| H | 5.00567  | -1.15020 | 1.72301  |
| C | -2.82358 | -1.91167 | -0.93266 |
| C | -2.49401 | -0.44098 | -1.17947 |
| C | -1.85816 | 0.16715  | 0.09224  |
| C | -2.84048 | 0.04200  | 1.27329  |
| C | -3.16621 | -1.42988 | 1.51604  |
| C | -3.75301 | -2.07889 | 0.26586  |
| H | -1.89365 | -2.46204 | -0.75755 |
| H | -3.27669 | -2.33264 | -1.83078 |

|   |          |          |          |
|---|----------|----------|----------|
| H | -3.41253 | 0.10237  | -1.41998 |
| H | -1.82406 | -0.33625 | -2.03466 |
| H | -2.41191 | 0.49424  | 2.17066  |
| H | -3.76373 | 0.58017  | 1.03952  |
| H | -2.25433 | -1.95762 | 1.81185  |
| H | -3.86255 | -1.51073 | 2.35117  |
| H | -4.72036 | -1.61853 | 0.04043  |
| H | -3.94305 | -3.13688 | 0.44706  |

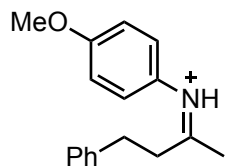

### Hydrogenation *Z*-Iminium 19

M06-2X/def2-TZVP Geometry

|   |          |          |          |
|---|----------|----------|----------|
| C | 0.97048  | -2.82466 | 0.57971  |
| C | 1.27395  | -1.67875 | 1.30031  |
| C | 2.20720  | -0.76485 | 0.81921  |
| C | 2.83108  | -1.01923 | -0.40011 |
| C | 2.52748  | -2.16361 | -1.12680 |
| C | 1.59488  | -3.06847 | -0.63674 |
| C | 2.52066  | 0.48499  | 1.59858  |
| C | 1.53933  | 1.64828  | 1.29081  |
| C | 1.61800  | 2.03934  | -0.14086 |
| C | 2.81208  | 2.77614  | -0.62972 |
| N | 0.68031  | 1.74981  | -0.97640 |
| C | -0.57484 | 1.09229  | -0.68702 |
| C | -1.61899 | 1.82490  | -0.15412 |
| C | -2.83066 | 1.20199  | 0.10608  |
| C | -2.98321 | -0.15583 | -0.18152 |
| C | -1.91511 | -0.87710 | -0.72796 |
| C | -0.71219 | -0.25750 | -0.98352 |
| O | -4.10640 | -0.84956 | 0.03212  |
| C | -5.23080 | -0.17555 | 0.57438  |
| H | 0.25373  | -3.53362 | 0.97348  |
| H | 0.78997  | -1.49939 | 2.25406  |
| H | 3.58839  | -0.33636 | -0.77277 |
| H | 3.03242  | -2.35822 | -2.06404 |
| H | 1.36800  | -3.96824 | -1.19330 |
| H | 3.54674  | 0.80397  | 1.41129  |
| H | 2.44064  | 0.29308  | 2.66855  |
| H | 1.82209  | 2.51646  | 1.89064  |
| H | 0.52583  | 1.34961  | 1.55150  |

|   |          |          |          |
|---|----------|----------|----------|
| H | 2.79743  | 3.77811  | -0.19223 |
| H | 2.83894  | 2.86181  | -1.71426 |
| H | 3.72198  | 2.29070  | -0.27784 |
| H | 0.83381  | 2.00915  | -1.94797 |
| H | -1.49487 | 2.87972  | 0.05853  |
| H | -3.64202 | 1.77924  | 0.52323  |
| H | -2.05633 | -1.92858 | -0.93813 |
| H | 0.12161  | -0.81714 | -1.39069 |
| H | -5.00078 | 0.23198  | 1.56133  |
| H | -5.56216 | 0.62441  | -0.09117 |
| H | -6.01251 | -0.92322 | 0.66334  |

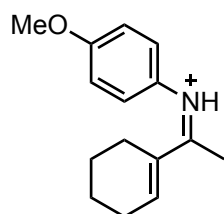

### Hydrogenation *Z*-Iminium 20

M06-2X/def2-TZVP Geometry

|   |          |          |          |
|---|----------|----------|----------|
| C | 3.89012  | -1.42830 | 0.56887  |
| C | 3.28882  | -0.06705 | 0.52829  |
| C | 2.10383  | 0.22628  | -0.04086 |
| C | 1.30475  | -0.83355 | -0.77779 |
| C | 2.20997  | -1.99124 | -1.19191 |
| C | 2.97052  | -2.51399 | 0.02035  |
| C | 1.68444  | 1.62091  | -0.03728 |
| C | 2.68631  | 2.72937  | 0.05200  |
| N | 0.43741  | 1.98476  | -0.15404 |
| H | 0.82767  | -0.38392 | -1.65127 |
| H | 2.91698  | -1.65664 | -1.95631 |
| H | 3.06675  | 2.78798  | 1.07423  |
| H | 3.52800  | 2.54530  | -0.61102 |
| H | 2.23732  | 3.69186  | -0.18658 |
| H | 0.27231  | 2.97945  | -0.26993 |
| H | 4.20900  | -1.64320 | 1.59235  |
| C | -2.07074 | -0.29177 | 1.32907  |
| C | -0.91503 | 0.43420  | 1.15922  |
| C | -0.74699 | 1.19387  | 0.00484  |
| C | -1.73987 | 1.25340  | -0.95646 |
| H | -2.23505 | -0.88704 | 2.21668  |
| H | -0.14176 | 0.42076  | 1.91762  |
| H | -1.60319 | 1.85678  | -1.84560 |
| C | -3.07636 | -0.25804 | 0.35340  |

|   |          |          |          |
|---|----------|----------|----------|
| C | -2.90636 | 0.52326  | -0.79185 |
| C | -5.22775 | -0.98886 | -0.32572 |
| O | -4.16040 | -0.99483 | 0.61007  |
| H | -5.98957 | -1.64158 | 0.08782  |
| H | 0.49850  | -1.21967 | -0.15223 |
| H | 4.82019  | -1.37736 | -0.01167 |
| H | 1.60288  | -2.77882 | -1.63688 |
| H | 2.25557  | -2.81411 | 0.79086  |
| H | 3.55380  | -3.39810 | -0.23293 |
| H | 3.87042  | 0.71985  | 0.99636  |
| H | -3.67135 | 0.57076  | -1.55199 |
| H | -5.63269 | 0.01802  | -0.44469 |
| H | -4.89834 | -1.37589 | -1.29207 |

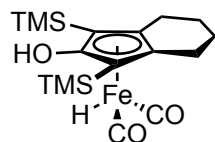

### Knölker's Complex

M06/def2-TZVP Geometry

|    |          |          |          |
|----|----------|----------|----------|
| C  | -0.74862 | 1.19362  | -0.57827 |
| C  | 0.65756  | 1.11321  | -0.67906 |
| C  | 1.51357  | 2.33301  | -0.79817 |
| C  | 0.76073  | 3.57315  | -0.34037 |
| C  | -0.60885 | 3.64350  | -0.99382 |
| C  | -1.49492 | 2.49353  | -0.53661 |
| C  | -1.29359 | -0.13996 | -0.57957 |
| C  | -0.16775 | -0.98628 | -0.75483 |
| C  | 1.04212  | -0.26627 | -0.77473 |
| H  | 2.45018  | 2.22313  | -0.24334 |
| H  | 0.63756  | 3.54846  | 0.75130  |
| H  | -1.09466 | 4.59723  | -0.77392 |
| H  | -1.85051 | 2.69553  | 0.48351  |
| O  | -0.17513 | -2.33950 | -0.80691 |
| Si | 2.70334  | -1.09870 | -0.94558 |
| Si | -3.09973 | -0.57360 | -0.44882 |
| Fe | -0.12129 | 0.43220  | 1.38896  |
| C  | -0.29990 | -1.47698 | 2.14686  |
| O  | -0.56499 | -2.45477 | 2.64451  |
| H  | -1.08341 | -2.66017 | -0.82236 |
| H  | 1.80962  | 2.45993  | -1.84912 |
| H  | 1.34362  | 4.46858  | -0.56961 |
| H  | -0.48253 | 3.59732  | -2.08272 |
| H  | -2.39185 | 2.43369  | -1.16243 |

|   |          |          |          |
|---|----------|----------|----------|
| C | -4.02606 | -0.05344 | -1.98799 |
| H | -5.08175 | -0.32665 | -1.90895 |
| H | -3.97370 | 1.02576  | -2.14696 |
| H | -3.61699 | -0.54019 | -2.87607 |
| C | -3.85870 | 0.24514  | 1.04781  |
| H | -3.77582 | 1.33319  | 1.00124  |
| H | -4.92010 | -0.00776 | 1.11930  |
| H | -3.36906 | -0.07695 | 1.97056  |
| C | -3.31320 | -2.43311 | -0.26034 |
| H | -3.02340 | -2.99403 | -1.15517 |
| H | -2.78005 | -2.83960 | 0.60367  |
| H | -4.37450 | -2.64423 | -0.10383 |
| C | 2.75493  | -2.03847 | -2.56000 |
| H | 1.94413  | -2.76815 | -2.60497 |
| H | 2.64966  | -1.36342 | -3.41211 |
| C | 4.10757  | 0.14003  | -0.92498 |
| H | 4.02035  | 0.87904  | -1.72411 |
| H | 4.18264  | 0.67377  | 0.02559  |
| H | 5.04925  | -0.39632 | -1.07203 |
| C | 2.96407  | -2.29972 | 0.46802  |
| H | 3.06039  | -1.77886 | 1.42466  |
| H | 2.12841  | -2.99897 | 0.54446  |
| H | 3.87772  | -2.88050 | 0.31547  |
| H | 3.70242  | -2.57308 | -2.66711 |
| C | 1.79730  | 0.86618  | 2.14177  |
| O | 2.71326  | 1.33800  | 2.60066  |
| H | -0.83730 | 1.29557  | 2.62323  |

## Cartesian coordinates of reaction components relevant to chiral phosphate catalysis

Additional reaction components required for re-creating the statistical model have been published elsewhere.<sup>11</sup>

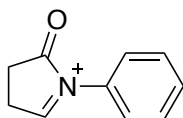

**Iminium 1**

M06/def2-TZVP Geometry

|   |          |          |          |
|---|----------|----------|----------|
| C | 1.45125  | -1.28476 | 0.44582  |
| N | 0.76445  | -0.24882 | 0.12385  |
| C | 1.69908  | 0.88501  | -0.29408 |
| C | 3.07950  | 0.33267  | -0.12413 |
| C | 2.90748  | -1.10958 | 0.32060  |
| C | -0.65855 | -0.14720 | 0.07066  |
| C | -1.27674 | 0.99556  | 0.55459  |
| C | -2.65635 | 1.06289  | 0.51792  |
| C | -3.39529 | 0.01333  | -0.00342 |
| C | -2.76109 | -1.11680 | -0.49563 |
| C | -1.38400 | -1.20321 | -0.46368 |
| O | 1.28539  | 1.91548  | -0.65907 |
| H | 0.95982  | -2.19267 | 0.78448  |
| H | 3.61720  | 0.44399  | -1.06686 |
| H | 3.60816  | 0.94870  | 0.60632  |
| H | 3.39079  | -1.34847 | 1.27270  |
| H | 3.30161  | -1.84081 | -0.39328 |
| H | -0.69541 | 1.81023  | 0.96505  |
| H | -3.15660 | 1.94348  | 0.90012  |
| H | -4.47573 | 0.07963  | -0.03499 |
| H | -3.34004 | -1.92782 | -0.91860 |
| H | -0.87587 | -2.06575 | -0.88124 |

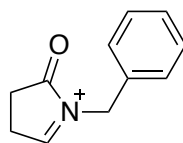

**Iminium 2**

M06/def2-TZVP Geometry

|   |         |          |          |
|---|---------|----------|----------|
| C | 1.06221 | 1.10187  | -0.00009 |
| N | 1.20495 | -0.16846 | -0.00005 |



|   |          |          |          |
|---|----------|----------|----------|
| C | 2.65721  | -0.54540 | -0.00012 |
| C | 3.40541  | 0.75278  | 0.00007  |
| C | 2.33934  | 1.83826  | -0.00007 |
| C | 0.15878  | -1.21854 | -0.00003 |
| O | 2.98693  | -1.67094 | 0.00015  |
| H | 0.07001  | 1.54869  | -0.00011 |
| H | 4.05863  | 0.78194  | 0.87398  |
| H | 4.05894  | 0.78199  | -0.87359 |
| H | 2.37551  | 2.50197  | -0.86963 |
| H | 2.37540  | 2.50208  | 0.86942  |
| H | 0.36285  | -1.83678 | -0.87808 |
| H | 0.36288  | -1.83678 | 0.87802  |
| C | -3.73032 | 0.52186  | 0.00003  |
| C | -3.10415 | 0.23071  | 1.20111  |
| C | -1.84776 | -0.34908 | 1.20187  |
| C | -1.21348 | -0.64134 | -0.00001 |
| C | -1.84781 | -0.34910 | -1.20186 |
| C | -3.10420 | 0.23069  | -1.20107 |
| H | -4.71729 | 0.96814  | 0.00004  |
| H | -3.60108 | 0.44449  | 2.13933  |
| H | -1.36299 | -0.59483 | 2.14226  |
| H | -1.36307 | -0.59486 | -2.14227 |
| H | -3.60116 | 0.44446  | -2.13928 |

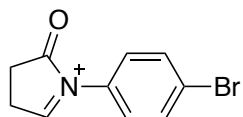

### Iminium 3

M06/def2-TZVP Geometry

|   |          |          |          |
|---|----------|----------|----------|
| C | -2.98771 | -1.27772 | 0.43053  |
| N | -2.27896 | -0.24972 | 0.12584  |
| C | -3.19243 | 0.90420  | -0.28968 |
| C | -4.58269 | 0.37400  | -0.13502 |
| C | -4.43920 | -1.07684 | 0.29099  |
| C | -0.85793 | -0.17078 | 0.08154  |
| C | -0.21922 | 0.96800  | 0.55189  |
| C | 1.15881  | 1.01854  | 0.52785  |
| C | 1.88285  | -0.05415 | 0.02619  |
| C | 1.23664  | -1.18510 | -0.45605 |
| C | -0.13942 | -1.24380 | -0.43014 |
| O | -2.75858 | 1.93035  | -0.64319 |
| H | -2.51684 | -2.19737 | 0.76612  |
| H | -5.10405 | 0.98925  | 0.60146  |
| H | -5.11316 | 0.50854  | -1.07881 |

|    |          |          |          |
|----|----------|----------|----------|
| H  | -4.83724 | -1.79029 | -0.43867 |
| H  | -4.93834 | -1.32107 | 1.23349  |
| H  | -0.78461 | 1.80063  | 0.94815  |
| H  | 1.67652  | 1.89326  | 0.90002  |
| Br | 3.75202  | 0.02853  | -0.01579 |
| H  | 1.81210  | -2.00670 | -0.86276 |
| H  | -0.65182 | -2.10747 | -0.84005 |

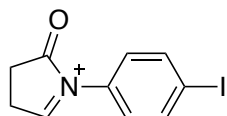

### Iminium 4

M06/def2-TZVP Geometry

|   |          |          |          |
|---|----------|----------|----------|
| C | 3.56705  | -1.27641 | 0.42629  |
| N | 2.85558  | -0.24881 | 0.12459  |
| C | 3.76609  | 0.90739  | -0.28827 |
| C | 5.15779  | 0.38114  | -0.13278 |
| C | 5.01812  | -1.07192 | 0.28681  |
| C | 1.43495  | -0.17324 | 0.08061  |
| C | 0.79302  | 0.96447  | 0.54889  |
| C | -0.58556 | 1.00904  | 0.52746  |
| C | -1.31542 | -0.06495 | 0.03040  |
| C | -0.65854 | -1.19364 | -0.44992 |
| C | 0.71796  | -1.24950 | -0.42651 |
| O | 3.33095  | 1.93309  | -0.64194 |
| H | 3.09831  | -2.19773 | 0.75986  |
| H | 5.69043  | 0.52189  | -1.07437 |
| H | 5.67486  | 0.99476  | 0.60812  |
| H | 5.51884  | -1.31889 | 1.22770  |
| H | 5.41751  | -1.78056 | -0.44679 |
| H | 1.35618  | 1.80008  | 0.94229  |
| H | -1.09669 | 1.88731  | 0.90164  |
| I | -3.39013 | 0.02098  | -0.01098 |
| H | -1.22399 | -2.02312 | -0.85612 |
| H | 1.23205  | -2.11295 | -0.83519 |

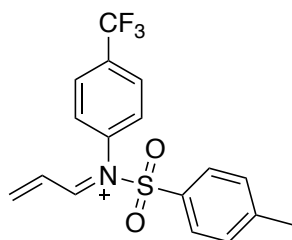

### Iminium 5

#### M06/def2-TZVP Geometry

|   |          |          |          |
|---|----------|----------|----------|
| C | -1.09673 | -3.46509 | -1.38565 |
| C | -1.76513 | -4.42904 | -2.02475 |
| C | -1.82308 | -2.52170 | -0.60129 |
| N | -1.30838 | -1.54577 | 0.06912  |
| S | -2.42736 | -0.49027 | 1.08981  |
| C | 0.08370  | -1.19823 | 0.06308  |
| C | -2.03775 | 1.06155  | 0.44498  |
| O | -3.70829 | -0.94472 | 0.68350  |
| O | -1.91225 | -0.66133 | 2.39648  |
| C | -1.07344 | 1.83604  | 1.08127  |
| C | -0.73386 | 3.05102  | 0.52689  |
| C | -1.33562 | 3.50205  | -0.64712 |
| C | -2.29838 | 2.69970  | -1.26202 |
| C | -2.65745 | 1.48248  | -0.72763 |
| C | -0.98512 | 4.83224  | -1.21562 |
| C | 0.86110  | -1.46200 | 1.17523  |
| C | 2.18649  | -1.05947 | 1.17137  |
| C | 2.70603  | -0.40260 | 0.07074  |
| C | 1.91446  | -0.14741 | -1.04130 |
| C | 0.59372  | -0.54213 | -1.04887 |
| C | 4.13923  | 0.06425  | 0.03947  |
| F | 4.79068  | -0.25142 | 1.14651  |
| F | 4.78378  | -0.47592 | -0.98973 |
| F | 4.19100  | 1.38637  | -0.10745 |
| H | -0.01635 | -3.38931 | -1.43524 |
| H | -1.25530 | -5.17554 | -2.62109 |
| H | -2.84650 | -4.50189 | -1.96908 |
| H | -2.90742 | -2.61603 | -0.53212 |
| H | -0.61025 | 1.48855  | 1.99675  |
| H | 0.01128  | 3.67040  | 1.01334  |
| H | -2.77732 | 3.04820  | -2.17020 |
| H | -3.41800 | 0.86935  | -1.19690 |
| H | -1.11333 | 4.85460  | -2.29794 |
| H | -1.63971 | 5.60230  | -0.79711 |
| H | 0.03968  | 5.11553  | -0.97531 |
| H | 0.43401  | -1.96588 | 2.03326  |

|   |          |          |          |
|---|----------|----------|----------|
| H | 2.81394  | -1.25916 | 2.03028  |
| H | 2.33634  | 0.36609  | -1.89752 |
| H | -0.04854 | -0.33534 | -1.89843 |

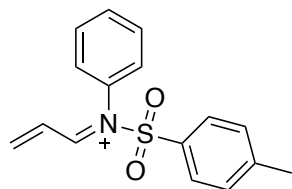

### Iminium 6

#### M06/def2-TZVP Geometry

|   |          |          |          |
|---|----------|----------|----------|
| C | 3.28793  | -0.62485 | -1.46482 |
| C | 4.09943  | -1.43686 | -2.14722 |
| C | 2.27991  | -1.19294 | -0.63092 |
| N | 1.42979  | -0.52833 | 0.07768  |
| S | 0.25304  | -1.46157 | 1.13879  |
| C | 1.30814  | 0.90303  | 0.06901  |
| C | -1.24317 | -0.91099 | 0.47573  |
| O | 0.53587  | -2.80694 | 0.78651  |
| O | 0.48785  | -0.92289 | 2.42577  |
| C | -1.88891 | 0.17229  | 1.06013  |
| C | -3.06077 | 0.62478  | 0.49202  |
| C | -3.59218 | 0.01984  | -0.64531 |
| C | -2.91582 | -1.06234 | -1.21120 |
| C | -1.74576 | -1.53562 | -0.66154 |
| C | -4.87730 | 0.49381  | -1.22867 |
| C | 0.69676  | 1.50572  | -1.02015 |
| C | 0.53558  | 2.87859  | -1.01908 |
| C | 0.97612  | 3.62653  | 0.06159  |
| C | 1.58305  | 3.00827  | 1.14265  |
| C | 1.75214  | 1.63467  | 1.15708  |
| H | 3.38087  | 0.45398  | -1.51694 |
| H | 4.88636  | -1.05130 | -2.78347 |
| H | 4.00157  | -2.51611 | -2.08938 |
| H | 2.20713  | -2.27836 | -0.55529 |
| H | -1.47712 | 0.64062  | 1.94600  |
| H | -3.58146 | 1.46378  | 0.93963  |
| H | -3.32740 | -1.54269 | -2.09192 |
| H | -1.23245 | -2.38807 | -1.09083 |
| H | -4.89215 | 0.38034  | -2.31310 |
| H | -5.70905 | -0.09627 | -0.83312 |
| H | -5.07307 | 1.53683  | -0.98064 |

|   |         |         |          |
|---|---------|---------|----------|
| H | 0.34369 | 0.89745 | -1.84686 |
| H | 0.06216 | 3.36484 | -1.86284 |
| H | 1.93016 | 3.59728 | 1.98231  |
| H | 2.21636 | 1.13439 | 1.99786  |
| H | 0.84654 | 4.70181 | 0.06021  |

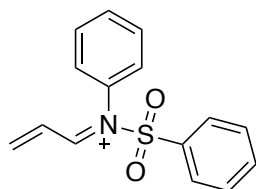

**Iminium 7**

M06/def2-TZVP Geometry

|   |          |          |          |
|---|----------|----------|----------|
| C | -3.14849 | -0.89922 | -1.05430 |
| C | -3.98800 | -1.79703 | -1.57733 |
| C | -1.97908 | -1.35645 | -0.37930 |
| N | -1.08672 | -0.60155 | 0.17046  |
| S | 0.29912  | -1.40196 | 1.06745  |
| C | -1.08488 | 0.83419  | 0.10724  |
| C | 1.63818  | -0.72275 | 0.20008  |
| O | 0.19563  | -0.86372 | 2.37149  |
| O | 0.10421  | -2.77456 | 0.76598  |
| C | 2.24974  | 0.42049  | 0.69917  |
| C | 3.28821  | 0.97655  | -0.02278 |
| C | 3.69196  | 0.39728  | -1.21583 |
| C | 3.07232  | -0.74696 | -1.69883 |
| C | 2.03446  | -1.31947 | -0.99138 |
| C | -1.40753 | 1.57105  | 1.23385  |
| C | -1.35142 | 2.95199  | 1.15745  |
| C | -0.97366 | 3.57229  | -0.02234 |
| C | -0.65298 | 2.81893  | -1.14091 |
| C | -0.70397 | 1.43891  | -1.08137 |
| H | -3.33764 | 0.16642  | -1.11628 |
| H | -4.89541 | -1.49782 | -2.08711 |
| H | -3.79307 | -2.86251 | -1.51015 |
| H | -1.80540 | -2.42945 | -0.29141 |
| H | 1.91940  | 0.85257  | 1.63584  |
| H | 3.78764  | 1.86187  | 0.34970  |
| H | 3.40822  | -1.19903 | -2.62346 |
| H | 1.54989  | -2.22379 | -1.34006 |
| H | -1.69220 | 1.07014  | 2.15083  |
| H | -1.60678 | 3.54507  | 2.02663  |
| H | -0.35893 | 3.30656  | -2.06190 |
| H | -0.44040 | 0.82803  | -1.93885 |
| H | -0.93048 | 4.65335  | -0.07160 |

H 4.50860 0.83822 -1.77482

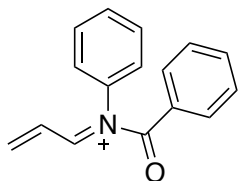

### Iminium 8

M06/def2-TZVP Geometry

|   |          |          |          |
|---|----------|----------|----------|
| C | 3.30342  | -1.21212 | -0.28546 |
| C | 4.21032  | -2.15543 | -0.56467 |
| C | 1.93295  | -1.60867 | -0.15822 |
| N | 0.92195  | -0.82910 | 0.07011  |
| C | -0.39496 | -1.52449 | 0.36105  |
| C | 1.03254  | 0.60335  | 0.19137  |
| C | -1.62474 | -0.81740 | -0.00966 |
| O | -0.31001 | -2.59228 | 0.87305  |
| C | -2.77634 | -1.16884 | 0.69857  |
| C | -3.98692 | -0.58988 | 0.36562  |
| C | -4.05479 | 0.31451  | -0.68756 |
| C | -2.91420 | 0.64399  | -1.41033 |
| C | -1.69405 | 0.08857  | -1.06899 |
| C | 0.57395  | 1.20147  | 1.35452  |
| C | 0.66931  | 2.57920  | 1.47802  |
| C | 1.20759  | 3.33681  | 0.44646  |
| C | 1.65511  | 2.72211  | -0.71636 |
| C | 1.56774  | 1.34573  | -0.85191 |
| H | 3.58137  | -0.17934 | -0.12847 |
| H | 5.26298  | -1.91747 | -0.64412 |
| H | 3.92348  | -3.18891 | -0.72183 |
| H | 1.69035  | -2.66589 | -0.21776 |
| H | -2.70510 | -1.89051 | 1.50165  |
| H | -4.87889 | -0.84810 | 0.91961  |
| H | -2.97786 | 1.33367  | -2.24063 |
| H | -0.81347 | 0.34304  | -1.64208 |
| H | 0.15469  | 0.60045  | 2.15202  |
| H | 0.32182  | 3.05921  | 2.38249  |
| H | 2.06534  | 3.31434  | -1.52292 |
| H | 1.88940  | 0.85500  | -1.76284 |
| H | 1.27497  | 4.41162  | 0.54666  |
| H | -5.00425 | 0.76134  | -0.95182 |

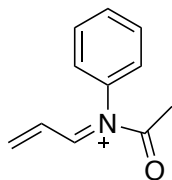

### Iminium 9

M06/def2-TZVP Geometry

|   |          |          |          |
|---|----------|----------|----------|
| C | -1.45053 | -2.05597 | 0.00005  |
| C | -2.47072 | -2.92323 | 0.00006  |
| C | -1.73773 | -0.66701 | 0.00002  |
| N | -0.86053 | 0.29154  | 0.00000  |
| C | -1.40142 | 1.71011  | -0.00003 |
| C | 0.55998  | 0.02767  | 0.00000  |
| O | -2.57397 | 1.84085  | -0.00001 |
| C | 1.21962  | -0.09538 | 1.21003  |
| C | 2.58124  | -0.34457 | 1.20246  |
| C | 3.25857  | -0.46684 | 0.00001  |
| C | 2.58123  | -0.34463 | -1.20244 |
| C | 1.21962  | -0.09544 | -1.21002 |
| H | -0.41865 | -2.38828 | 0.00005  |
| H | -2.30728 | -3.99407 | 0.00008  |
| H | -3.50211 | -2.58525 | 0.00005  |
| H | -2.77521 | -0.33058 | 0.00001  |
| H | 0.67333  | 0.00298  | 2.14210  |
| H | 3.11290  | -0.44503 | 2.14038  |
| H | 3.11288  | -0.44514 | -2.14037 |
| H | 0.67332  | 0.00287  | -2.14209 |
| H | 4.32395  | -0.66082 | 0.00001  |
| C | -0.35962 | 2.75840  | -0.00009 |
| H | -0.84749 | 3.72940  | -0.00012 |
| H | 0.28423  | 2.66388  | 0.87686  |
| H | 0.28419  | 2.66381  | -0.87706 |

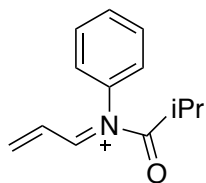

### Iminium 10

M06/def2-TZVP Geometry

|   |          |         |         |
|---|----------|---------|---------|
| C | -1.56243 | 2.46456 | 0.00399 |
| C | -1.79150 | 3.78030 | 0.09037 |

|   |          |          |          |
|---|----------|----------|----------|
| C | -0.21888 | 2.00805  | -0.04512 |
| N | 0.17037  | 0.77069  | -0.11327 |
| C | 1.68088  | 0.54771  | -0.21805 |
| C | -0.76864 | -0.32449 | -0.10369 |
| O | 2.34017  | 1.50460  | -0.42525 |
| C | -1.40053 | -0.66602 | 1.07980  |
| C | -2.30347 | -1.71486 | 1.07677  |
| C | -2.56417 | -2.40293 | -0.09677 |
| C | -1.92762 | -2.04567 | -1.27481 |
| C | -1.02198 | -0.99991 | -1.28534 |
| H | -2.37336 | 1.74675  | -0.04011 |
| H | -2.79693 | 4.18234  | 0.11697  |
| H | -0.97671 | 4.49564  | 0.13798  |
| H | 0.59165  | 2.73733  | -0.04670 |
| H | -1.18448 | -0.11649 | 1.99017  |
| H | -2.80359 | -1.99430 | 1.99560  |
| H | -2.13838 | -2.58078 | -2.19221 |
| H | -0.51722 | -0.70714 | -2.19972 |
| H | -3.27051 | -3.22378 | -0.09414 |
| C | 2.14423  | -0.84612 | 0.03975  |
| C | 3.49832  | -1.07482 | -0.60395 |
| C | 2.21463  | -1.02194 | 1.56107  |
| H | 1.40854  | -1.54986 | -0.35833 |
| H | 3.82431  | -2.09687 | -0.41063 |
| H | 3.46809  | -0.92353 | -1.68332 |
| H | 4.24325  | -0.39461 | -0.18862 |
| H | 2.56003  | -2.03116 | 1.78550  |
| H | 2.92964  | -0.31564 | 1.98867  |
| H | 1.24875  | -0.88270 | 2.04967  |

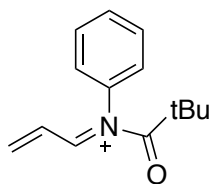

### Iminium 11

M06/def2-TZVP Geometry

|   |          |          |          |
|---|----------|----------|----------|
| C | -1.48730 | 2.65095  | 0.07790  |
| C | -1.57145 | 3.97958  | 0.19343  |
| C | -0.21065 | 2.05424  | -0.12450 |
| N | 0.03861  | 0.78753  | -0.22607 |
| C | 1.48720  | 0.41468  | -0.57774 |
| C | -0.97088 | -0.23336 | -0.14341 |



|   |          |          |          |
|---|----------|----------|----------|
| O | 1.95995  | 1.04270  | -1.45724 |
| C | -1.21307 | -0.99533 | -1.27395 |
| C | -2.14862 | -2.01121 | -1.20507 |
| C | -2.82182 | -2.25659 | -0.01871 |
| C | -2.57451 | -1.47983 | 1.10203  |
| C | -1.64456 | -0.45718 | 1.04597  |
| H | -2.36754 | 2.01975  | 0.11317  |
| H | -2.52282 | 4.47990  | 0.32486  |
| H | -0.68860 | 4.60984  | 0.15944  |
| H | 0.65174  | 2.71146  | -0.23020 |
| H | -0.67229 | -0.79366 | -2.19264 |
| H | -2.35190 | -2.61331 | -2.08168 |
| H | -3.10401 | -1.67285 | 2.02657  |
| H | -1.42965 | 0.15008  | 1.91892  |
| H | -3.54764 | -3.05866 | 0.03247  |
| C | 2.16432  | -0.60967 | 0.30487  |
| C | 3.64524  | -0.58251 | -0.05925 |
| C | 1.98403  | -0.18812 | 1.76363  |
| C | 1.62866  | -2.02826 | 0.08863  |
| H | 4.17863  | -1.28217 | 0.58578  |
| H | 3.80706  | -0.87956 | -1.09598 |
| H | 4.07706  | 0.40979  | 0.07906  |
| H | 2.57459  | -0.85622 | 2.39302  |
| H | 2.34457  | 0.82985  | 1.93617  |
| H | 0.94747  | -0.25829 | 2.09755  |
| H | 2.28024  | -2.71389 | 0.63409  |
| H | 0.61459  | -2.16858 | 0.46250  |
| H | 1.65910  | -2.31204 | -0.96563 |

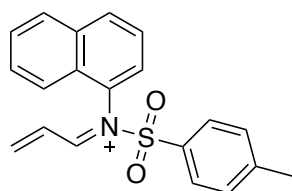

## Iminium 12

M06/def2-TZVP Geometry

|   |         |          |          |
|---|---------|----------|----------|
| C | 0.78467 | -1.72217 | 0.35769  |
| C | 1.49381 | -0.97169 | 1.29198  |
| C | 2.79120 | -0.61687 | 1.00055  |
| C | 3.39479 | -1.00304 | -0.19713 |
| C | 2.66517 | -1.77084 | -1.10198 |
| C | 1.36024 | -2.13001 | -0.83954 |
| C | 4.79986 | -0.60189 | -0.48316 |

|   |          |          |          |
|---|----------|----------|----------|
| S | -0.87303 | -2.09548 | 0.66073  |
| O | -1.36206 | -3.11005 | -0.20379 |
| O | -1.18686 | -2.02322 | 2.03865  |
| N | -1.67891 | -0.58257 | -0.01612 |
| C | -2.56522 | -0.72303 | -0.94286 |
| C | -1.28531 | 0.67618  | 0.55467  |
| C | -1.78669 | 1.02144  | 1.77903  |
| C | -1.35436 | 2.20385  | 2.39579  |
| C | -0.42555 | 2.99223  | 1.77999  |
| C | 0.10374  | 2.65477  | 0.51716  |
| C | -0.33471 | 1.47007  | -0.13389 |
| C | -3.31603 | 0.33808  | -1.53012 |
| C | -4.20887 | 0.05405  | -2.48137 |
| C | 1.06754  | 3.46453  | -0.11889 |
| C | 1.57427  | 3.12479  | -1.33886 |
| C | 1.13304  | 1.95662  | -1.98283 |
| C | 0.20042  | 1.14821  | -1.39787 |
| H | 1.02916  | -0.67897 | 2.22611  |
| H | 3.35992  | -0.03254 | 1.71581  |
| H | 3.13380  | -2.09312 | -2.02484 |
| H | 0.79409  | -2.73041 | -1.54167 |
| H | 4.90906  | 0.48423  | -0.43429 |
| H | 5.47971  | -1.01989 | 0.26313  |
| H | 5.12795  | -0.93687 | -1.46618 |
| H | -2.73677 | -1.74542 | -1.28175 |
| H | -2.49936 | 0.37049  | 2.27081  |
| H | -1.75721 | 2.47760  | 3.36232  |
| H | -0.07808 | 3.90225  | 2.25689  |
| H | -3.14729 | 1.35170  | -1.18382 |
| H | -4.80499 | 0.82636  | -2.95127 |
| H | -4.37268 | -0.96430 | -2.81879 |
| H | 1.39489  | 4.36792  | 0.38391  |
| H | 2.31190  | 3.75639  | -1.81822 |
| H | 1.53532  | 1.69674  | -2.95474 |
| H | -0.11933 | 0.24805  | -1.91124 |

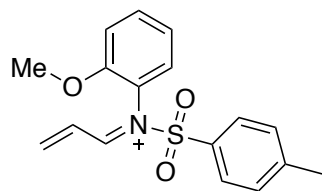

### Iminium 13

M06/def2-TZVP Geometry

|   |          |          |          |
|---|----------|----------|----------|
| C | -1.19010 | -1.15846 | -0.49413 |
|---|----------|----------|----------|

|   |          |          |          |
|---|----------|----------|----------|
| C | -1.77944 | -0.15916 | -1.26051 |
| C | -2.97170 | 0.38423  | -0.83092 |
| C | -3.58538 | -0.05745 | 0.34012  |
| C | -2.96788 | -1.06171 | 1.08628  |
| C | -1.77223 | -1.61421 | 0.68345  |
| C | -4.89618 | 0.50501  | 0.76879  |
| S | 0.32988  | -1.81698 | -0.98936 |
| O | 0.61179  | -3.05068 | -0.34616 |
| O | 0.58078  | -1.57506 | -2.36096 |
| N | 1.47733  | -0.65894 | -0.15128 |
| C | 2.28973  | -1.13132 | 0.73336  |
| C | 1.34690  | 0.72736  | -0.48424 |
| C | 1.78126  | 1.18991  | -1.71383 |
| C | 1.56923  | 2.51141  | -2.05745 |
| C | 0.91435  | 3.34678  | -1.16872 |
| C | 0.47718  | 2.88858  | 0.06317  |
| C | 0.69065  | 1.56590  | 0.42628  |
| C | 3.26610  | -0.37409 | 1.44371  |
| C | 4.05375  | -0.99344 | 2.32562  |
| O | 0.31862  | 1.01074  | 1.58905  |
| C | -0.49095 | 1.76750  | 2.46898  |
| H | -1.31145 | 0.17494  | -2.17890 |
| H | -3.44725 | 1.16069  | -1.41971 |
| H | -3.44371 | -1.41732 | 1.99353  |
| H | -1.29884 | -2.40100 | 1.25825  |
| H | -5.71425 | -0.09394 | 0.35840  |
| H | -5.00427 | 0.49326  | 1.85380  |
| H | -5.03399 | 1.52561  | 0.41123  |
| H | 2.21364  | -2.20305 | 0.91772  |
| H | 2.27069  | 0.50411  | -2.39444 |
| H | 1.91120  | 2.88401  | -3.01379 |
| H | 0.74048  | 4.38281  | -1.43334 |
| H | -0.02826 | 3.56485  | 0.73939  |
| H | 3.35628  | 0.68674  | 1.23906  |
| H | 4.81783  | -0.46166 | 2.87877  |
| H | 3.95870  | -2.05663 | 2.52091  |
| H | -0.72711 | 1.11513  | 3.30621  |
| H | 0.03807  | 2.64939  | 2.83975  |
| H | -1.41838 | 2.07525  | 1.97660  |

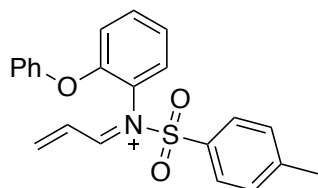

### Iminium 14

M06/def2-TZVP Geometry

|   |          |          |          |
|---|----------|----------|----------|
| C | -0.74417 | 1.96916  | -0.42906 |
| C | 0.12979  | 1.96307  | -1.51258 |
| C | 1.39099  | 2.48499  | -1.34445 |
| C | 1.79572  | 3.01042  | -0.11572 |
| C | 0.90121  | 2.99723  | 0.95067  |
| C | -0.37003 | 2.47717  | 0.80818  |
| C | 3.17341  | 3.55455  | 0.03750  |
| S | -2.34303 | 1.34242  | -0.63611 |
| O | -3.18937 | 1.71656  | 0.43495  |
| O | -2.74894 | 1.36077  | -1.99635 |
| N | -2.05521 | -0.43873 | -0.33437 |
| C | -2.30865 | -1.26871 | -1.29080 |
| C | -1.49635 | -0.80494 | 0.93139  |
| C | -2.25811 | -0.71057 | 2.08499  |
| C | -1.68846 | -1.02819 | 3.30161  |
| C | -0.36458 | -1.43684 | 3.34852  |
| C | 0.40022  | -1.53043 | 2.19985  |
| C | -0.15743 | -1.20589 | 0.97218  |
| O | 0.48300  | -1.28402 | -0.21278 |
| C | 1.86439  | -1.41881 | -0.25853 |
| C | 2.38068  | -2.52842 | -0.89496 |
| C | 3.75480  | -2.65158 | -1.02179 |
| C | 4.59222  | -1.67598 | -0.50986 |
| C | 4.05563  | -0.56883 | 0.12837  |
| C | 2.68435  | -0.42949 | 0.25318  |
| C | -2.19488 | -2.68713 | -1.20699 |
| C | -2.50346 | -3.42710 | -2.27424 |
| H | -0.18898 | 1.57141  | -2.47110 |
| H | 2.08440  | 2.49420  | -2.17842 |
| H | 1.20483  | 3.41016  | 1.90594  |
| H | -1.07221 | 2.47940  | 1.63317  |
| H | 3.34692  | 3.95391  | 1.03586  |
| H | 3.91421  | 2.77326  | -0.15520 |
| H | 3.36148  | 4.34949  | -0.68747 |
| H | -2.65943 | -0.82090 | -2.22056 |
| H | -3.28819 | -0.38419 | 2.01386  |
| H | -2.27643 | -0.96357 | 4.20750  |

|   |          |          |          |
|---|----------|----------|----------|
| H | 0.08454  | -1.69646 | 4.29956  |
| H | 1.43081  | -1.85833 | 2.24795  |
| H | 1.70618  | -3.27991 | -1.28818 |
| H | 4.17076  | -3.51799 | -1.52108 |
| H | 5.66588  | -1.77774 | -0.60649 |
| H | 4.71102  | 0.19271  | 0.53450  |
| H | 2.24663  | 0.43199  | 0.74724  |
| H | -1.87624 | -3.13341 | -0.27173 |
| H | -2.44853 | -4.50835 | -2.25263 |
| H | -2.82379 | -2.97177 | -3.20565 |

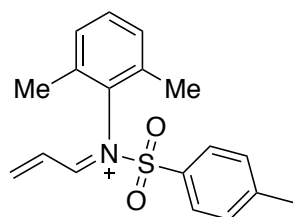

### Iminium 15

M06/def2-TZVP Geometry

|   |          |          |          |
|---|----------|----------|----------|
| C | 1.58831  | -0.69136 | -0.57439 |
| C | 1.99575  | 0.53890  | -1.07822 |
| C | 3.19043  | 1.06772  | -0.63842 |
| C | 3.98420  | 0.38830  | 0.28517  |
| C | 3.54612  | -0.84426 | 0.77146  |
| C | 2.35467  | -1.39231 | 0.35097  |
| C | 5.29485  | 0.94760  | 0.71646  |
| S | 0.11174  | -1.38402 | -1.14540 |
| O | -0.29158 | -0.78263 | -2.36127 |
| O | 0.06561  | -2.78315 | -0.90628 |
| N | -1.12480 | -0.74666 | 0.05885  |
| C | -1.73040 | -1.60690 | 0.80670  |
| C | -1.41836 | 0.66860  | 0.06856  |
| C | -0.74579 | 1.48595  | 0.97931  |
| C | -1.03141 | 2.84490  | 0.93632  |
| C | -1.95075 | 3.35313  | 0.04084  |
| C | -2.63347 | 2.50737  | -0.81380 |
| C | -2.39197 | 1.14180  | -0.81799 |
| C | -2.75825 | -1.29695 | 1.74672  |
| C | -3.31396 | -2.28496 | 2.45279  |
| C | 0.23348  | 0.97399  | 1.98695  |
| C | -3.18200 | 0.23811  | -1.70778 |
| H | 1.38776  | 1.05865  | -1.80875 |
| H | 3.52621  | 2.02327  | -1.02535 |

|   |          |          |          |
|---|----------|----------|----------|
| H | 4.16139  | -1.38246 | 1.48378  |
| H | 2.02736  | -2.35961 | 0.71303  |
| H | 5.54406  | 0.64887  | 1.73493  |
| H | 6.09265  | 0.57536  | 0.06725  |
| H | 5.30927  | 2.03571  | 0.65432  |
| H | -1.41998 | -2.64515 | 0.68625  |
| H | -0.52768 | 3.50472  | 1.63397  |
| H | -2.15716 | 4.41641  | 0.02495  |
| H | -3.38266 | 2.90529  | -1.48855 |
| H | -3.06922 | -0.26390 | 1.85929  |
| H | -4.10126 | -2.09704 | 3.17225  |
| H | -2.99860 | -3.31612 | 2.33019  |
| H | 0.05479  | -0.06232 | 2.27758  |
| H | 1.25783  | 1.03232  | 1.60964  |
| H | 0.19017  | 1.58133  | 2.89113  |
| H | -4.01144 | 0.78279  | -2.15592 |
| H | -2.57281 | -0.17055 | -2.51485 |
| H | -3.60579 | -0.60824 | -1.16019 |

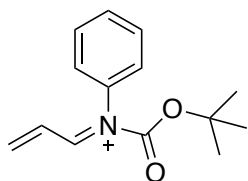

### Iminium 16

M06/def2-TZVP Geometry

|   |          |          |          |
|---|----------|----------|----------|
| N | -0.66908 | -0.84648 | -0.04241 |
| C | -1.42364 | -1.90268 | -0.05049 |
| C | -1.20560 | 0.49514  | -0.02714 |
| C | -1.78169 | 0.96795  | 1.13794  |
| C | -2.29698 | 2.25245  | 1.15253  |
| C | -2.22932 | 3.03944  | 0.01527  |
| C | -1.64678 | 2.54914  | -1.14309 |
| C | -1.12548 | 1.26868  | -1.17053 |
| C | 0.81261  | -1.08873 | -0.01215 |
| O | 1.40060  | 0.05054  | 0.04940  |
| O | 1.21308  | -2.20524 | -0.04381 |
| C | 2.90565  | 0.16400  | 0.06921  |
| C | 3.10487  | 1.65739  | 0.11983  |
| C | 3.44762  | -0.43103 | -1.20618 |
| C | 3.42048  | -0.51532 | 1.31301  |
| C | -2.84210 | -1.91248 | -0.11607 |
| C | -3.47860 | -3.08901 | -0.09530 |
| H | -0.87880 | -2.84600 | -0.01657 |

|   |          |          |          |
|---|----------|----------|----------|
| H | -1.81791 | 0.34013  | 2.02164  |
| H | -2.74927 | 2.63850  | 2.05741  |
| H | -2.63293 | 4.04425  | 0.03096  |
| H | -1.59813 | 3.16646  | -2.03133 |
| H | -0.65999 | 0.87268  | -2.06593 |
| H | 2.65484  | 2.08213  | 1.01840  |
| H | 4.17346  | 1.87669  | 0.13428  |
| H | 2.66726  | 2.13992  | -0.75599 |
| H | 3.30438  | -1.50972 | -1.25307 |
| H | 2.98824  | 0.03660  | -2.07956 |
| H | 4.52008  | -0.23231 | -1.24932 |
| H | 3.27129  | -1.59401 | 1.28588  |
| H | 4.49286  | -0.32601 | 1.38921  |
| H | 2.94586  | -0.10363 | 2.20574  |
| H | -3.37892 | -0.97379 | -0.19001 |
| H | -4.55814 | -3.15278 | -0.15484 |
| H | -2.93627 | -4.02567 | -0.01566 |

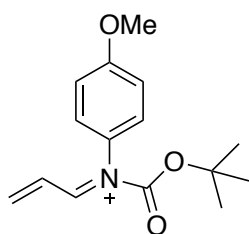

### Iminium 17

M06/def2-TZVP Geometry

|   |          |          |          |
|---|----------|----------|----------|
| N | 0.55075  | 1.29772  | 0.04088  |
| C | 0.56668  | 2.59740  | 0.00470  |
| C | -0.66075 | 0.52726  | 0.11485  |
| C | -0.89662 | -0.28964 | 1.21485  |
| C | -2.05677 | -1.01767 | 1.27723  |
| C | -2.99294 | -0.95346 | 0.23818  |
| C | -2.74235 | -0.14020 | -0.86529 |
| C | -1.57362 | 0.59671  | -0.92060 |
| C | 1.89194  | 0.62767  | -0.04616 |
| O | 1.70318  | -0.64010 | -0.12561 |
| O | 2.87310  | 1.29557  | -0.03394 |
| C | 2.85271  | -1.61294 | -0.12896 |
| C | 3.62349  | -1.44215 | 1.15649  |
| C | 3.68495  | -1.37489 | -1.36352 |
| C | 2.13664  | -2.93889 | -0.17885 |
| O | -4.08049 | -1.70342 | 0.39347  |
| C | -5.07143 | -1.69680 | -0.61395 |

|   |          |          |          |
|---|----------|----------|----------|
| C | -0.55617 | 3.45315  | 0.15889  |
| C | -0.37995 | 4.77539  | 0.06009  |
| H | 1.55581  | 3.03215  | -0.13271 |
| H | -0.17119 | -0.34548 | 2.01884  |
| H | -2.27508 | -1.65423 | 2.12556  |
| H | -3.44328 | -0.08453 | -1.68675 |
| H | -1.36569 | 1.21699  | -1.78612 |
| H | 2.96298  | -1.54558 | 2.02059  |
| H | 4.37469  | -2.23175 | 1.21673  |
| H | 4.13902  | -0.48381 | 1.20585  |
| H | 3.06916  | -1.43005 | -2.26321 |
| H | 4.20002  | -0.41566 | -1.33429 |
| H | 4.43932  | -2.16138 | -1.42762 |
| H | 1.53802  | -3.02569 | -1.08685 |
| H | 2.87071  | -3.74587 | -0.17206 |
| H | 1.48256  | -3.06072 | 0.68682  |
| H | -5.85534 | -2.37000 | -0.27704 |
| H | -5.49165 | -0.69600 | -0.75006 |
| H | -4.67160 | -2.05892 | -1.56562 |
| H | -1.52764 | 3.02178  | 0.37047  |
| H | -1.19976 | 5.46992  | 0.19501  |
| H | 0.59233  | 5.20267  | -0.16273 |

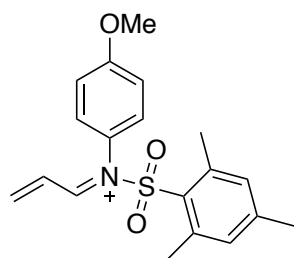

### Iminium 18

M06/def2-TZVP Geometry

|   |          |          |          |
|---|----------|----------|----------|
| C | 1.75385  | -0.27451 | 0.53112  |
| C | 1.30466  | -1.53289 | 0.99350  |
| C | 1.77693  | -2.65108 | 0.32521  |
| C | 2.63692  | -2.57611 | -0.75830 |
| C | 3.03020  | -1.31954 | -1.19852 |
| C | 2.61629  | -0.15281 | -0.58486 |
| S | 1.19747  | 1.18160  | 1.30310  |
| O | 0.45748  | 0.94013  | 2.48526  |
| O | 2.12245  | 2.25533  | 1.21389  |
| N | -0.12586 | 1.69803  | 0.12751  |
| C | -0.07147 | 2.87845  | -0.38798 |
| C | -1.18735 | 0.76045  | -0.09726 |
| C | -2.26063 | 0.72155  | 0.77318  |



|   |          |          |          |
|---|----------|----------|----------|
| C | -3.26307 | -0.21262 | 0.58488  |
| C | -3.17968 | -1.11572 | -0.47449 |
| C | -2.08508 | -1.06512 | -1.34394 |
| C | -1.09273 | -0.13418 | -1.15762 |
| C | 3.14551  | -3.80797 | -1.42061 |
| C | 0.35883  | -1.77327 | 2.12759  |
| C | 3.10506  | 1.13604  | -1.16895 |
| C | -1.04730 | 3.44258  | -1.26404 |
| C | -0.87348 | 4.68559  | -1.71848 |
| O | -4.08617 | -2.05463 | -0.73927 |
| C | -5.22067 | -2.16922 | 0.09504  |
| H | 1.45192  | -3.62726 | 0.66966  |
| H | 3.69251  | -1.24546 | -2.05504 |
| H | 0.79898  | 3.47499  | -0.11143 |
| H | -2.30536 | 1.41394  | 1.60611  |
| H | -4.10138 | -0.23229 | 1.26765  |
| H | -2.04514 | -1.77290 | -2.16246 |
| H | -0.23793 | -0.09631 | -1.82566 |
| H | 4.10654  | -4.09690 | -0.98550 |
| H | 2.46403  | -4.64821 | -1.28806 |
| H | 3.31093  | -3.65155 | -2.48705 |
| H | 0.19617  | -2.84411 | 2.23677  |
| H | 0.73675  | -1.38712 | 3.07320  |
| H | -0.61022 | -1.29893 | 1.95810  |
| H | 2.28797  | 1.80462  | -1.45238 |
| H | 3.73792  | 1.68760  | -0.47496 |
| H | 3.68147  | 0.93018  | -2.06924 |
| H | -1.91149 | 2.84671  | -1.53530 |
| H | -1.58960 | 5.15481  | -2.38152 |
| H | -0.00697 | 5.27554  | -1.43774 |
| H | -5.82020 | -1.25435 | 0.07811  |
| H | -5.81196 | -2.99000 | -0.30260 |
| H | -4.93423 | -2.39937 | 1.12549  |

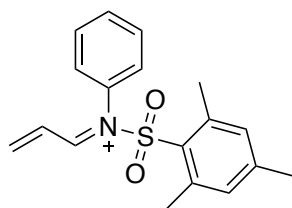

### Iminium 19

M06/def2-TZVP Geometry

|   |         |          |         |
|---|---------|----------|---------|
| C | 1.20988 | -0.64187 | 0.56235 |
| C | 1.89539 | 0.53474  | 0.94386 |

|   |          |          |          |
|---|----------|----------|----------|
| C | 3.06163  | 0.82970  | 0.25615  |
| C | 3.55416  | 0.03945  | -0.76971 |
| C | 2.83539  | -1.09257 | -1.13035 |
| C | 1.66862  | -1.46726 | -0.49277 |
| S | -0.27017 | -1.07892 | 1.36171  |
| O | -0.50696 | -2.47824 | 1.38534  |
| O | -0.57192 | -0.25662 | 2.47290  |
| N | -1.51078 | -0.49796 | 0.12092  |
| C | -2.38245 | -1.33485 | -0.32820 |
| C | -1.48882 | 0.90071  | -0.20330 |
| C | -0.71212 | 1.33365  | -1.26545 |
| C | -0.66395 | 2.68809  | -1.54396 |
| C | -1.38104 | 3.58325  | -0.76610 |
| C | -2.15435 | 3.13263  | 0.29190  |
| C | -2.21069 | 1.78165  | 0.58487  |
| C | 4.83217  | 0.37866  | -1.45234 |
| C | 1.47951  | 1.49429  | 2.01362  |
| C | 0.98582  | -2.70415 | -0.98740 |
| C | -3.44228 | -1.02110 | -1.23144 |
| C | -4.28549 | -1.98618 | -1.60551 |
| H | 3.60911  | 1.72271  | 0.53897  |
| H | 3.20336  | -1.71361 | -1.94070 |
| H | -2.28041 | -2.35951 | 0.03212  |
| H | -0.15161 | 0.61698  | -1.85711 |
| H | -0.06520 | 3.04423  | -2.37292 |
| H | -1.33878 | 4.64244  | -0.98816 |
| H | -2.71470 | 3.83528  | 0.89583  |
| H | -2.79225 | 1.40824  | 1.41980  |
| H | 5.66308  | -0.14493 | -0.97081 |
| H | 4.82303  | 0.07108  | -2.49846 |
| H | 5.04739  | 1.44581  | -1.39896 |
| H | 2.20092  | 2.30779  | 2.06532  |
| H | 0.49591  | 1.92580  | 1.81824  |
| H | 1.42526  | 1.02343  | 2.99440  |
| H | 0.95681  | -3.48723 | -0.23082 |
| H | -0.04756 | -2.51875 | -1.29179 |
| H | 1.51561  | -3.08713 | -1.85784 |
| H | -3.54085 | -0.00249 | -1.58973 |
| H | -5.10561 | -1.79350 | -2.28593 |
| H | -4.18250 | -3.00223 | -1.23841 |

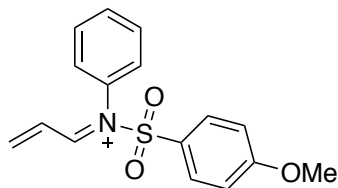

### Iminium 20

M06/def2-TZVP Geometry

|   |          |          |          |
|---|----------|----------|----------|
| C | 0.82883  | -1.12484 | 0.48194  |
| C | 1.28569  | -1.74159 | -0.68685 |
| C | 2.50780  | -1.39129 | -1.19056 |
| C | 3.29254  | -0.42741 | -0.53859 |
| C | 2.82525  | 0.18423  | 0.62867  |
| C | 1.59233  | -0.16269 | 1.13399  |
| S | -0.72832 | -1.51531 | 1.08538  |
| O | -1.17095 | -2.79616 | 0.66268  |
| O | -0.93198 | -1.00816 | 2.39122  |
| N | -1.77046 | -0.39698 | 0.05082  |
| C | -2.70080 | -0.91722 | -0.67594 |
| C | -1.45393 | 1.00282  | 0.08535  |
| C | -0.76566 | 1.55019  | -0.98701 |
| C | -0.41566 | 2.88678  | -0.94354 |
| C | -0.74701 | 3.65360  | 0.16262  |
| C | -1.43237 | 3.09065  | 1.22684  |
| C | -1.79031 | 1.75383  | 1.19853  |
| O | 4.46132  | -0.16754 | -1.10217 |
| C | -3.61980 | -0.19291 | -1.49269 |
| C | -4.53397 | -0.86540 | -2.19604 |
| C | 5.33799  | 0.76749  | -0.49853 |
| H | 0.68593  | -2.50213 | -1.17298 |
| H | 2.90560  | -1.85625 | -2.08382 |
| H | 3.42315  | 0.92145  | 1.14629  |
| H | 1.21992  | 0.30139  | 2.03947  |
| H | -2.77722 | -2.00415 | -0.63235 |
| H | -0.50183 | 0.92603  | -1.83481 |
| H | 0.11859  | 3.32961  | -1.77486 |
| H | -0.47071 | 4.70037  | 0.19407  |
| H | -1.69398 | 3.69486  | 2.08648  |
| H | -2.31789 | 1.29505  | 2.02556  |
| H | -3.56368 | 0.88954  | -1.51362 |
| H | -5.25937 | -0.35732 | -2.81915 |
| H | -4.58556 | -1.94903 | -2.16897 |
| H | 4.88595  | 1.76209  | -0.45792 |
| H | 5.62045  | 0.44833  | 0.50800  |
| H | 6.22435  | 0.80148  | -1.12614 |

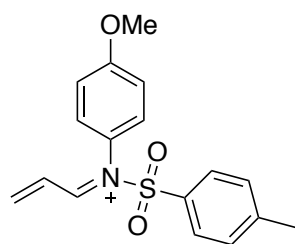

### Iminium 21

#### M06/def2-TZVP Geometry

|   |          |          |          |
|---|----------|----------|----------|
| C | 1.87780  | -0.40226 | 0.54237  |
| C | 2.73936  | -0.46840 | -0.54758 |
| C | 2.96811  | -1.69289 | -1.13468 |
| C | 2.35330  | -2.84936 | -0.65292 |
| C | 1.49362  | -2.74849 | 0.43921  |
| C | 1.24606  | -1.53424 | 1.04311  |
| C | 2.64040  | -4.17156 | -1.27451 |
| S | 1.53161  | 1.13889  | 1.24432  |
| O | 0.86628  | 1.01055  | 2.48702  |
| O | 2.56245  | 2.08463  | 1.00226  |
| N | 0.20234  | 1.69943  | 0.11005  |
| C | 0.39685  | 2.77888  | -0.57215 |
| C | -0.94653 | 0.85250  | -0.01386 |
| C | -1.09144 | 0.08625  | -1.16753 |
| C | -2.15641 | -0.77129 | -1.28083 |
| C | -3.08825 | -0.87956 | -0.24267 |
| C | -2.92964 | -0.11120 | 0.91034  |
| C | -1.85409 | 0.75022  | 1.02426  |
| O | -4.08411 | -1.73814 | -0.44743 |
| C | -5.07007 | -1.90171 | 0.55214  |
| C | -0.54439 | 3.37653  | -1.46162 |
| C | -0.20727 | 4.49335  | -2.11139 |
| H | 3.23174  | 0.42567  | -0.91207 |
| H | 3.64411  | -1.76437 | -1.97947 |
| H | 1.01405  | -3.64267 | 0.82121  |
| H | 0.57951  | -1.45555 | 1.89338  |
| H | 1.81376  | -4.86892 | -1.13876 |
| H | 2.85070  | -4.07763 | -2.34021 |
| H | 3.52324  | -4.62086 | -0.81062 |
| H | 1.36278  | 3.26206  | -0.42305 |
| H | -0.35399 | 0.16053  | -1.96077 |
| H | -2.29684 | -1.38077 | -2.16477 |
| H | -3.64092 | -0.17524 | 1.72227  |
| H | -1.72161 | 1.34175  | 1.92177  |

|   |          |          |          |
|---|----------|----------|----------|
| H | -5.77331 | -2.63744 | 0.17072  |
| H | -4.63298 | -2.27190 | 1.48405  |
| H | -5.60006 | -0.96426 | 0.74364  |
| H | -1.51945 | 2.91737  | -1.57828 |
| H | -0.89563 | 4.99036  | -2.78349 |
| H | 0.77120  | 4.94663  | -1.98988 |

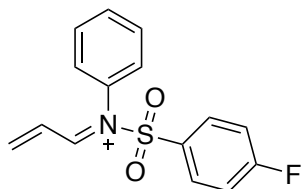

**Iminium 22**

M06/def2-TZVP Geometry

|   |          |          |          |
|---|----------|----------|----------|
| C | -1.28491 | -0.88074 | 0.45130  |
| C | -1.78626 | -1.51693 | -0.68107 |
| C | -2.94139 | -1.04050 | -1.25801 |
| C | -3.56477 | 0.05962  | -0.68851 |
| C | -3.07524 | 0.69488  | 0.44102  |
| C | -1.91770 | 0.22141  | 1.01843  |
| F | -4.66492 | 0.51318  | -1.24013 |
| S | 0.19477  | -1.44957 | 1.13960  |
| O | 0.41230  | -0.90556 | 2.42698  |
| O | 0.45604  | -2.80215 | 0.80015  |
| N | 1.39937  | -0.54395 | 0.09410  |
| C | 2.25537  | -1.22615 | -0.59207 |
| C | 1.29900  | 0.88961  | 0.07351  |
| C | 0.71793  | 1.49327  | -1.03175 |
| C | 0.57677  | 2.86836  | -1.04332 |
| C | 1.00762  | 3.61741  | 0.04065  |
| C | 1.58506  | 2.99821  | 1.13731  |
| C | 1.73351  | 1.62233  | 1.16474  |
| C | 3.28736  | -0.67804 | -1.40856 |
| C | 4.10045  | -1.50696 | -2.06920 |
| H | -1.28387 | -2.38627 | -1.08827 |
| H | -3.37911 | -1.50806 | -2.13055 |
| H | -3.61042 | 1.54184  | 0.85052  |
| H | -1.50680 | 0.68990  | 1.90451  |
| H | 2.16624  | -2.30986 | -0.51066 |
| H | 0.37378  | 0.88472  | -1.86209 |
| H | 0.12710  | 3.35550  | -1.89946 |
| H | 0.89396  | 4.69440  | 0.02927  |
| H | 1.92531  | 3.58825  | 1.97904  |
| H | 2.17448  | 1.12145  | 2.01765  |
| H | 3.39695  | 0.39891  | -1.46639 |

|   |         |          |          |
|---|---------|----------|----------|
| H | 4.90524 | -1.13728 | -2.69248 |
| H | 3.98592 | -2.58429 | -2.00597 |

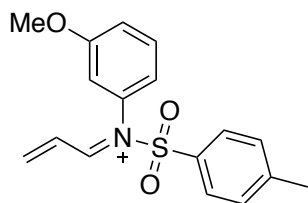

### Iminium 23

#### M06/def2-TZVP Geometry

|   |          |          |          |
|---|----------|----------|----------|
| C | -0.69101 | -1.77409 | 0.27542  |
| C | -1.56550 | -1.16062 | 1.16423  |
| C | -2.86737 | -0.94614 | 0.76418  |
| C | -3.30514 | -1.32801 | -0.50217 |
| C | -2.40045 | -1.93880 | -1.37217 |
| C | -1.09604 | -2.16695 | -0.99635 |
| S | 0.95959  | -1.99010 | 0.73283  |
| O | 1.14921  | -1.80344 | 2.12233  |
| O | 1.59788  | -3.01374 | -0.01507 |
| N | 1.68927  | -0.46822 | 0.00346  |
| C | 2.66134  | -0.59360 | -0.83563 |
| C | 1.12116  | 0.79054  | 0.40402  |
| C | 1.40800  | 1.29972  | 1.65980  |
| C | 0.80347  | 2.49059  | 2.01835  |
| C | -0.06206 | 3.14896  | 1.16043  |
| C | -0.33849 | 2.61789  | -0.09734 |
| C | 0.26436  | 1.41964  | -0.47642 |
| C | -4.72130 | -1.12314 | -0.91356 |
| O | -1.15800 | 3.16625  | -0.99884 |
| C | -1.78817 | 4.39174  | -0.68706 |
| C | 3.37665  | 0.48167  | -1.44149 |
| C | 4.36414  | 0.20349  | -2.29611 |
| H | -1.22416 | -0.86411 | 2.14869  |
| H | -3.56514 | -0.47554 | 1.44762  |
| H | -2.73644 | -2.24587 | -2.35639 |
| H | -0.39914 | -2.65626 | -1.66661 |
| H | 2.94795  | -1.61861 | -1.07308 |
| H | 2.07491  | 0.77436  | 2.33047  |
| H | 1.01062  | 2.91997  | 2.99080  |
| H | -0.51802 | 4.07719  | 1.47748  |
| H | 0.03732  | 0.99246  | -1.44741 |
| H | -4.79887 | -0.88352 | -1.97467 |
| H | -5.29663 | -2.03875 | -0.74927 |
| H | -5.19909 | -0.33080 | -0.33789 |

|   |          |          |          |
|---|----------|----------|----------|
| H | -2.43854 | 4.29403  | 0.18729  |
| H | -1.05386 | 5.18245  | -0.50745 |
| H | -2.39101 | 4.65561  | -1.55232 |
| H | 3.10925  | 1.50032  | -1.18485 |
| H | 4.94265  | 0.98592  | -2.77123 |
| H | 4.62579  | -0.81944 | -2.54674 |

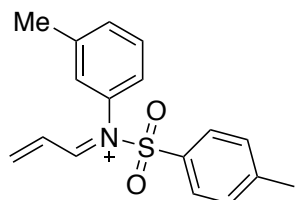

### Iminium 24

M06/def2-TZVP Geometry

|   |          |          |          |
|---|----------|----------|----------|
| C | -1.49113 | -0.73633 | 0.62698  |
| C | -2.18986 | -1.43695 | -0.35084 |
| C | -3.28366 | -0.83893 | -0.93554 |
| C | -3.69121 | 0.44225  | -0.56076 |
| C | -2.96896 | 1.11730  | 0.42136  |
| C | -1.86871 | 0.54214  | 1.02032  |
| S | -0.07919 | -1.44830 | 1.32117  |
| O | 0.35257  | -0.74495 | 2.47062  |
| O | -0.08535 | -2.86441 | 1.22544  |
| N | 1.16522  | -0.97882 | 0.05233  |
| C | 1.84176  | -1.91710 | -0.52012 |
| C | 1.28812  | 0.41835  | -0.26055 |
| C | 0.72366  | 0.87928  | -1.43792 |
| C | 0.79675  | 2.23355  | -1.71170 |
| C | 1.41625  | 3.08980  | -0.81983 |
| C | 1.98674  | 2.62473  | 0.36288  |
| C | 1.91087  | 1.26589  | 0.63982  |
| C | -4.89860 | 1.05952  | -1.17556 |
| C | 2.67654  | 3.56284  | 1.29608  |
| C | 2.87938  | -1.72357 | -1.47966 |
| C | 3.49673  | -2.79098 | -1.99214 |
| H | -1.88543 | -2.43872 | -0.63059 |
| H | -3.84577 | -1.37363 | -1.69313 |
| H | -3.28140 | 2.11130  | 0.72109  |
| H | -1.30864 | 1.06538  | 1.78579  |
| H | 1.58790  | -2.93280 | -0.21508 |
| H | 0.22432  | 0.18982  | -2.11049 |
| H | 0.36248  | 2.62156  | -2.62474 |
| H | 1.46355  | 4.15079  | -1.04184 |

|   |          |          |          |
|---|----------|----------|----------|
| H | 2.33032  | 0.86752  | 1.55681  |
| H | -5.03213 | 0.73850  | -2.20898 |
| H | -4.85370 | 2.14817  | -1.14761 |
| H | -5.79528 | 0.75747  | -0.62674 |
| H | 2.08871  | 4.46947  | 1.44846  |
| H | 3.64131  | 3.87409  | 0.88778  |
| H | 2.85979  | 3.10514  | 2.26783  |
| H | 3.15172  | -0.71288 | -1.76163 |
| H | 4.29856  | -2.69282 | -2.71330 |
| H | 3.21833  | -3.79956 | -1.70411 |

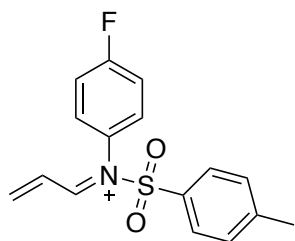

### Iminium 25

M06/def2-TZVP Geometry

|   |          |          |          |
|---|----------|----------|----------|
| C | 1.35935  | -1.05807 | 0.45623  |
| C | 1.91904  | 0.05869  | 1.06675  |
| C | 3.04577  | 0.62044  | 0.50607  |
| C | 3.61773  | 0.09055  | -0.64945 |
| C | 3.02851  | -1.02815 | -1.24050 |
| C | 1.90412  | -1.61007 | -0.69875 |
| S | -0.08236 | -1.74293 | 1.11468  |
| O | -0.25733 | -3.10059 | 0.74068  |
| O | -0.35332 | -1.24683 | 2.41210  |
| N | -1.34004 | -0.88898 | 0.07717  |
| C | -2.15876 | -1.61055 | -0.61336 |
| C | -1.30901 | 0.54491  | 0.06599  |
| C | -0.77949 | 1.18672  | -1.04489 |
| C | -0.68975 | 2.56332  | -1.05368 |
| C | -1.12636 | 3.26458  | 0.05664  |
| C | -1.65184 | 2.63182  | 1.16865  |
| C | -1.74107 | 1.25353  | 1.17597  |
| C | 4.85689  | 0.68344  | -1.22307 |
| C | -3.22561 | -1.11479 | -1.41907 |
| C | -3.99650 | -1.98185 | -2.08089 |
| F | -1.03747 | 4.57777  | 0.05314  |
| H | 1.47781  | 0.46659  | 1.96810  |
| H | 3.49978  | 1.48687  | 0.97375  |
| H | 3.47237  | -1.45090 | -2.13491 |



|   |          |          |          |
|---|----------|----------|----------|
| H | 1.45987  | -2.49060 | -1.14808 |
| H | -2.00726 | -2.68820 | -0.54342 |
| H | -0.42824 | 0.60334  | -1.88981 |
| H | -0.28469 | 3.10154  | -1.90092 |
| H | -1.98523 | 3.22398  | 2.01123  |
| H | -2.13769 | 0.72942  | 2.03655  |
| H | 4.90835  | 0.54283  | -2.30292 |
| H | 4.93436  | 1.74791  | -1.00153 |
| H | 5.73796  | 0.19877  | -0.79251 |
| H | -3.39761 | -0.04543 | -1.46472 |
| H | -4.82737 | -1.65263 | -2.69247 |
| H | -3.82011 | -3.05142 | -2.02968 |

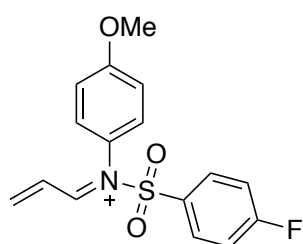

### Iminium 26

M06/def2-TZVP Geometry

|   |          |          |          |
|---|----------|----------|----------|
| C | -1.85130 | -0.55209 | 0.50743  |
| C | -2.71554 | -0.65857 | -0.57841 |
| C | -2.87210 | -1.88176 | -1.19029 |
| C | -2.15948 | -2.96606 | -0.70158 |
| C | -1.30144 | -2.86952 | 0.38136  |
| C | -1.14184 | -1.64580 | 0.99333  |
| S | -1.61207 | 0.99859  | 1.23632  |
| O | -2.70504 | 1.87284  | 1.00050  |
| O | -0.95242 | 0.88776  | 2.48338  |
| N | -0.31601 | 1.66531  | 0.12903  |
| C | -0.57213 | 2.74779  | -0.52965 |
| C | 0.88593  | 0.89606  | -0.00148 |
| C | 1.09778  | 0.18106  | -1.17790 |
| C | 2.21514  | -0.60544 | -1.29993 |
| C | 3.13466  | -0.69246 | -0.24834 |
| C | 2.90947  | 0.02473  | 0.92682  |
| C | 1.78102  | 0.81401  | 1.04958  |
| C | 0.33906  | 3.42685  | -1.39031 |
| C | -0.06312 | 4.53448  | -2.01927 |
| F | -2.30852 | -4.13124 | -1.28636 |
| O | 4.18398  | -1.48053 | -0.46256 |
| C | 5.16089  | -1.62060 | 0.55015  |

|   |          |          |          |
|---|----------|----------|----------|
| H | -3.27121 | 0.20567  | -0.92259 |
| H | -3.54240 | -2.01927 | -2.02892 |
| H | -0.78020 | -3.75223 | 0.72851  |
| H | -0.48249 | -1.53273 | 1.84513  |
| H | -1.56898 | 3.16398  | -0.38265 |
| H | 0.37253  | 0.23911  | -1.98375 |
| H | 2.40786  | -1.17404 | -2.20111 |
| H | 3.61028  | -0.02328 | 1.74893  |
| H | 1.59630  | 1.36432  | 1.96400  |
| H | 1.34400  | 3.03635  | -1.50312 |
| H | 0.59981  | 5.09194  | -2.66921 |
| H | -1.07122 | 4.91892  | -1.90258 |
| H | 5.63113  | -0.66083 | 0.78241  |
| H | 4.72984  | -2.04728 | 1.46041  |
| H | 5.91242  | -2.30069 | 0.15794  |

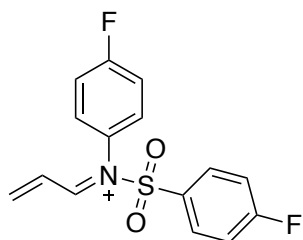

### Iminium 27

M06/def2-TZVP Geometry

|   |          |          |          |
|---|----------|----------|----------|
| C | -1.39987 | -1.03115 | 0.41766  |
| C | -1.94910 | 0.08822  | 1.03612  |
| C | -3.05920 | 0.68136  | 0.47707  |
| C | -3.58680 | 0.14416  | -0.68585 |
| C | -3.04776 | -0.97324 | -1.30600 |
| C | -1.93978 | -1.56912 | -0.74739 |
| S | 0.02226  | -1.74582 | 1.09115  |
| O | 0.27219  | -1.26747 | 2.39909  |
| O | 0.17678  | -3.10218 | 0.70512  |
| N | 1.30955  | -0.90327 | 0.08897  |
| C | 2.14772  | -1.63238 | -0.57143 |
| C | 1.29099  | 0.53153  | 0.07590  |
| C | 1.69659  | 1.23836  | 1.19700  |
| C | 1.61921  | 2.61739  | 1.18463  |
| C | 1.13251  | 3.25282  | 0.05635  |
| C | 0.72362  | 2.55317  | -1.06578 |
| C | 0.80137  | 1.17587  | -1.05190 |
| F | -4.64167 | 0.71097  | -1.21994 |
| F | 1.05537  | 4.56594  | 0.04822  |
| C | 3.24520  | -1.14509 | -1.33882 |

|   |          |          |          |
|---|----------|----------|----------|
| C | 4.03402  | -2.01921 | -1.97035 |
| H | -1.51287 | 0.47589  | 1.94857  |
| H | -3.52986 | 1.54640  | 0.92618  |
| H | -3.51353 | -1.36098 | -2.20282 |
| H | -1.50497 | -2.45531 | -1.19438 |
| H | 1.98630  | -2.70885 | -0.50586 |
| H | 2.06452  | 0.71307  | 2.06960  |
| H | 1.93321  | 3.20843  | 2.03545  |
| H | 0.34976  | 3.09331  | -1.92610 |
| H | 0.47360  | 0.59435  | -1.90752 |
| H | 3.42576  | -0.07700 | -1.38068 |
| H | 4.88875  | -1.69689 | -2.55208 |
| H | 3.84906  | -3.08754 | -1.92306 |

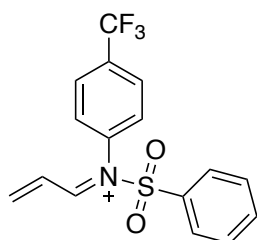

### Iminium 28

M06/def2-TZVP Geometry

|   |          |          |          |
|---|----------|----------|----------|
| C | -2.07236 | -1.39474 | 0.20018  |
| C | -1.08688 | -2.23873 | 0.69771  |
| C | -0.76464 | -3.36895 | -0.02882 |
| C | -1.41531 | -3.63415 | -1.22406 |
| C | -2.40004 | -2.78214 | -1.70517 |
| C | -2.73849 | -1.64903 | -0.99367 |
| S | -2.45250 | 0.05536  | 1.06985  |
| O | -3.74897 | 0.54253  | 0.76444  |
| O | -1.90329 | 0.04404  | 2.37307  |
| N | -1.37110 | 1.24316  | 0.17229  |
| C | -1.91839 | 2.26419  | -0.39988 |
| C | 0.03327  | 0.94650  | 0.13512  |
| C | 0.56522  | 0.42099  | -1.03445 |
| C | 1.90158  | 0.08363  | -1.06476 |
| C | 2.68673  | 0.26698  | 0.06584  |
| C | 2.14455  | 0.79274  | 1.22452  |
| C | 0.80336  | 1.13567  | 1.26741  |
| C | 4.13963  | -0.12959 | -0.01081 |
| C | -1.22347 | 3.30233  | -1.08554 |
| C | -1.92418 | 4.29960  | -1.63314 |
| F | 4.75099  | 0.52912  | -0.98996 |

|   |          |          |          |
|---|----------|----------|----------|
| F | 4.78329  | 0.11738  | 1.11797  |
| F | 4.25012  | -1.42925 | -0.27423 |
| H | -0.59620 | -2.01292 | 1.63668  |
| H | -0.00692 | -4.04766 | 0.34164  |
| H | -1.15801 | -4.52380 | -1.78632 |
| H | -2.91210 | -3.01011 | -2.63143 |
| H | -3.51805 | -0.98105 | -1.34051 |
| H | -3.00507 | 2.31657  | -0.32373 |
| H | -0.07098 | 0.26988  | -1.90027 |
| H | 2.34090  | -0.32803 | -1.96605 |
| H | 2.76686  | 0.93698  | 2.09812  |
| H | 0.36029  | 1.53857  | 2.16947  |
| H | -0.14117 | 3.26788  | -1.13846 |
| H | -1.43946 | 5.11575  | -2.15455 |
| H | -3.00747 | 4.33043  | -1.57530 |

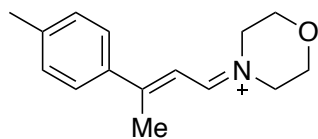

### Iminium 29

M06/def2-TZVP Geometry

|   |          |          |          |
|---|----------|----------|----------|
| C | -4.49442 | 0.63692  | 0.12130  |
| C | -3.25592 | 1.23588  | 0.09552  |
| C | -2.08516 | 0.47926  | -0.05610 |
| C | -2.23342 | -0.90805 | -0.21235 |
| C | -3.47361 | -1.49734 | -0.20434 |
| C | -4.63188 | -0.74048 | -0.02588 |
| C | -5.96856 | -1.39156 | 0.01925  |
| C | -0.78380 | 1.11855  | -0.06402 |
| C | -0.74689 | 2.59001  | -0.29337 |
| C | 0.35369  | 0.37833  | 0.16132  |
| C | 1.64783  | 0.90208  | 0.14863  |
| H | 1.78874  | 1.95422  | -0.07830 |
| N | 2.76482  | 0.26656  | 0.39283  |
| C | 4.06314  | 0.94383  | 0.34393  |
| C | 4.98698  | 0.19727  | -0.59775 |
| O | 5.10784  | -1.14111 | -0.20772 |
| C | 3.87425  | -1.79752 | -0.24607 |
| C | 2.88710  | -1.15603 | 0.71246  |
| H | -5.38103 | 1.24703  | 0.25375  |
| H | -3.20028 | 2.30989  | 0.21869  |
| H | -1.36783 | -1.53398 | -0.39085 |

|   |          |          |          |
|---|----------|----------|----------|
| H | -3.55947 | -2.56859 | -0.35061 |
| H | -6.02005 | -2.24635 | -0.65632 |
| H | -6.17228 | -1.76750 | 1.02641  |
| H | -6.76655 | -0.69406 | -0.23484 |
| H | -1.17928 | 3.11081  | 0.56520  |
| H | 0.25082  | 2.99190  | -0.44184 |
| H | -1.34989 | 2.85811  | -1.16183 |
| H | 0.23509  | -0.67039 | 0.39654  |
| H | 3.91725  | 1.97685  | 0.02689  |
| H | 4.48539  | 0.93924  | 1.35397  |
| H | 5.98217  | 0.64264  | -0.57189 |
| H | 4.60482  | 0.26757  | -1.62820 |
| H | 4.04206  | -2.83640 | 0.04055  |
| H | 3.45971  | -1.78475 | -1.26632 |
| H | 3.26072  | -1.23558 | 1.73821  |
| H | 1.91760  | -1.64471 | 0.65767  |

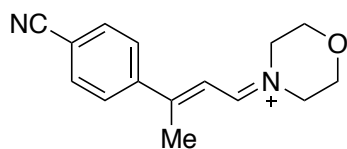

### Iminium 30

M06/def2-TZVP Geometry

|   |          |          |          |
|---|----------|----------|----------|
| C | 3.38613  | -1.16910 | -0.59572 |
| C | 2.12317  | -0.62873 | -0.65116 |
| C | 1.84026  | 0.61236  | -0.06756 |
| C | 2.88393  | 1.29815  | 0.56398  |
| C | 4.14645  | 0.75483  | 0.64179  |
| C | 4.40628  | -0.48372 | 0.06162  |
| C | 0.50050  | 1.19019  | -0.12634 |
| C | 0.39596  | 2.66923  | -0.00612 |
| C | -0.58546 | 0.36743  | -0.25675 |
| C | -1.90728 | 0.82381  | -0.37462 |
| H | -2.09074 | 1.89285  | -0.42692 |
| N | -2.98797 | 0.09943  | -0.44691 |
| C | -4.31562 | 0.70732  | -0.59108 |
| C | -5.22160 | 0.20785  | 0.51777  |
| O | -5.28048 | -1.18925 | 0.50961  |
| C | -4.02297 | -1.75473 | 0.73419  |
| C | -3.04752 | -1.36227 | -0.36236 |
| H | 3.59931  | -2.12049 | -1.06644 |
| H | 1.35632  | -1.16115 | -1.20012 |
| H | 2.70655  | 2.26009  | 1.02730  |

|   |          |          |          |
|---|----------|----------|----------|
| H | 4.94219  | 1.28500  | 1.14954  |
| H | 1.12317  | 3.15917  | -0.65513 |
| H | -0.58833 | 3.06582  | -0.23842 |
| H | 0.63082  | 2.97497  | 1.01756  |
| H | -0.41477 | -0.70082 | -0.25207 |
| H | -4.21641 | 1.79292  | -0.57257 |
| H | -4.71862 | 0.40331  | -1.56203 |
| H | -6.23310 | 0.58610  | 0.36580  |
| H | -4.85875 | 0.57615  | 1.49006  |
| H | -4.14169 | -2.83880 | 0.74517  |
| H | -3.62432 | -1.44260 | 1.71205  |
| H | -2.06038 | -1.77428 | -0.16880 |
| H | -3.40388 | -1.73461 | -1.32756 |
| N | 6.76773  | -1.50322 | 0.18657  |
| C | 5.71414  | -1.04649 | 0.13036  |

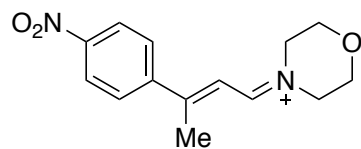

### Iminium 31

M06/def2-TZVP Geometry

|   |          |          |          |
|---|----------|----------|----------|
| C | 2.99901  | -1.00926 | -0.62610 |
| C | 1.72055  | -0.50165 | -0.69652 |
| C | 1.40109  | 0.73078  | -0.11484 |
| C | 2.41431  | 1.44814  | 0.52976  |
| C | 3.69307  | 0.94026  | 0.62264  |
| C | 3.96308  | -0.28162 | 0.04252  |
| C | 0.04326  | 1.27061  | -0.19053 |
| C | -0.09891 | 2.74947  | -0.12922 |
| C | -1.01590 | 0.41138  | -0.28308 |
| C | -2.35289 | 0.82419  | -0.40908 |
| H | -2.56776 | 1.88489  | -0.49954 |
| N | -3.41040 | 0.06581  | -0.44653 |
| C | -4.75780 | 0.62726  | -0.59897 |
| C | -5.63580 | 0.14368  | 0.53937  |
| O | -5.65176 | -1.25366 | 0.58539  |
| C | -4.37542 | -1.77212 | 0.81620  |
| C | -3.42465 | -1.39321 | -0.30667 |
| H | 3.26561  | -1.95191 | -1.08510 |
| H | 0.97265  | -1.05156 | -1.25442 |
| H | 2.20210  | 2.40416  | 0.99069  |
| H | 4.48269  | 1.47483  | 1.13368  |
| H | -1.09305 | 3.11236  | -0.37477 |

|   |          |          |          |
|---|----------|----------|----------|
| H | 0.13066  | 3.10136  | 0.88083  |
| H | 0.61645  | 3.23042  | -0.79800 |
| H | -0.81141 | -0.65017 | -0.23874 |
| H | -4.69180 | 1.71524  | -0.62386 |
| H | -5.16082 | 0.27292  | -1.55261 |
| H | -6.65992 | 0.48526  | 0.38520  |
| H | -5.27378 | 0.56036  | 1.49224  |
| H | -4.46072 | -2.85803 | 0.86990  |
| H | -3.97544 | -1.41085 | 1.77645  |
| H | -2.42324 | -1.76807 | -0.11112 |
| H | -3.78125 | -1.81124 | -1.25280 |
| N | 5.33961  | -0.82931 | 0.13065  |
| O | 6.15670  | -0.15753 | 0.70896  |
| O | 5.53090  | -1.90418 | -0.38180 |

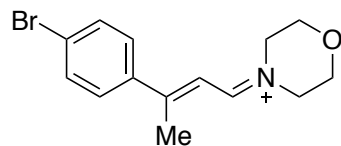

**Iminium 32**

M06/def2-TZVP Geometry

|   |          |          |          |
|---|----------|----------|----------|
| C | -2.55030 | -0.90065 | -0.54702 |
| C | -1.25700 | -0.43720 | -0.58308 |
| C | -0.91641 | 0.82481  | -0.07334 |
| C | -1.94799 | 1.60546  | 0.46690  |
| C | -3.24316 | 1.14352  | 0.52551  |
| C | -3.54479 | -0.11146 | 0.01709  |
| C | 0.44749  | 1.32286  | -0.11106 |
| C | 0.64015  | 2.79197  | 0.03824  |
| C | 1.49787  | 0.44850  | -0.24944 |
| C | 2.83689  | 0.83838  | -0.35222 |
| H | 3.07627  | 1.89687  | -0.38265 |
| N | 3.88441  | 0.06184  | -0.43434 |
| C | 5.23865  | 0.60676  | -0.56805 |
| C | 6.12338  | 0.03683  | 0.52300  |
| O | 6.11309  | -1.36144 | 0.48164  |
| C | 4.82894  | -1.86851 | 0.69854  |
| C | 3.87012  | -1.40107 | -0.38223 |
| H | -2.80028 | -1.86848 | -0.96275 |
| H | -0.50726 | -1.05547 | -1.06117 |
| H | -1.73692 | 2.58552  | 0.87506  |
| H | -4.02450 | 1.75244  | 0.96218  |
| H | 1.65274  | 3.12945  | -0.16199 |
| H | -0.03500 | 3.33806  | -0.62179 |
| H | 0.39875  | 3.09566  | 1.06071  |

|    |          |          |          |
|----|----------|----------|----------|
| H  | 1.27689  | -0.61006 | -0.26544 |
| H  | 5.62553  | 0.31044  | -1.54822 |
| H  | 5.19315  | 1.69515  | -0.52093 |
| H  | 5.78297  | 0.39826  | 1.50599  |
| H  | 7.15219  | 0.36736  | 0.37569  |
| H  | 4.89417  | -2.95710 | 0.68380  |
| H  | 4.45092  | -1.55994 | 1.68572  |
| H  | 2.86421  | -1.76600 | -0.19015 |
| H  | 4.20016  | -1.77235 | -1.35746 |
| Br | -5.30579 | -0.74064 | 0.07696  |

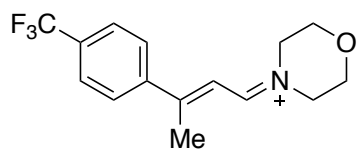

**Iminium 33**

M06/def2-TZVP Geometry

|   |          |          |          |
|---|----------|----------|----------|
| C | 2.63203  | -0.84476 | 0.62440  |
| C | 1.33895  | -0.38086 | 0.67551  |
| C | 0.98761  | 0.83674  | 0.07732  |
| C | 1.99026  | 1.57129  | -0.56110 |
| C | 3.28480  | 1.09655  | -0.63144 |
| C | 3.60636  | -0.11039 | -0.03876 |
| C | -0.38227 | 1.33892  | 0.12876  |
| C | -0.56950 | 2.80877  | -0.00171 |
| C | -1.42142 | 0.45752  | 0.26232  |
| C | -2.76578 | 0.84112  | 0.37553  |
| H | -3.00742 | 1.89863  | 0.42507  |
| N | -3.80622 | 0.05927  | 0.44669  |
| C | -5.16484 | 0.59438  | 0.58738  |
| C | -6.04032 | 0.04544  | -0.52249 |
| O | -6.02302 | -1.35286 | -0.51353 |
| C | -4.73585 | -1.84910 | -0.73488 |
| C | -3.78560 | -1.40332 | 0.36321  |
| H | 2.89823  | -1.77801 | 1.10709  |
| H | 0.60254  | -0.94926 | 1.23018  |
| H | 1.75937  | 2.51587  | -1.03655 |
| H | 4.04630  | 1.66778  | -1.14618 |
| H | 0.12430  | 3.34247  | 0.64932  |
| H | -0.34302 | 3.12054  | -1.02541 |
| H | -1.57645 | 3.15120  | 0.21925  |
| H | -1.19084 | -0.59946 | 0.26429  |
| H | -5.55302 | 0.27083  | 1.55811  |
| H | -5.12462 | 1.68375  | 0.56740  |
| H | -5.69625 | 0.43216  | -1.49448 |



|   |          |          |          |
|---|----------|----------|----------|
| H | -7.07128 | 0.36797  | -0.37285 |
| H | -4.79551 | -2.93800 | -0.74556 |
| H | -4.35275 | -1.51618 | -1.71211 |
| H | -2.77692 | -1.76045 | 0.17152  |
| H | -4.12255 | -1.79460 | 1.32791  |
| C | 5.00979  | -0.65873 | -0.07642 |
| F | 5.02292  | -1.86235 | -0.64188 |
| F | 5.83262  | 0.12399  | -0.75602 |
| F | 5.48916  | -0.79151 | 1.15663  |

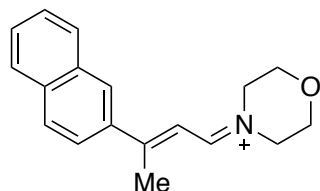

### Iminium 34

M06/def2-TZVP Geometry

|   |          |          |          |
|---|----------|----------|----------|
| C | -2.39924 | 1.03495  | 0.12012  |
| C | -1.26286 | 0.34092  | -0.26368 |
| C | -1.41223 | -1.02879 | -0.62566 |
| C | -2.62383 | -1.63776 | -0.58544 |
| C | 0.02545  | 1.00268  | -0.28537 |
| C | 0.04140  | 2.49217  | -0.22505 |
| C | 1.18332  | 0.25954  | -0.33215 |
| C | 2.46683  | 0.80283  | -0.40646 |
| H | 2.58140  | 1.87898  | -0.49093 |
| N | 3.60414  | 0.15532  | -0.40375 |
| C | 4.88661  | 0.85232  | -0.52891 |
| C | 5.79624  | 0.45141  | 0.61489  |
| O | 5.95487  | -0.93828 | 0.65077  |
| C | 4.73328  | -1.58481 | 0.86080  |
| C | 3.76106  | -1.29305 | -0.26815 |
| H | -2.33851 | 2.07848  | 0.40670  |
| H | -0.56119 | -1.59262 | -0.98492 |
| H | -2.72220 | -2.67557 | -0.88460 |
| H | -0.29135 | 2.83010  | 0.75982  |
| H | 1.02035  | 2.93003  | -0.39546 |
| H | -0.64633 | 2.91599  | -0.95749 |
| H | 1.09414  | -0.81723 | -0.29793 |
| H | 5.34086  | 0.55666  | -1.48021 |
| H | 4.70977  | 1.92821  | -0.54265 |
| H | 5.38244  | 0.81877  | 1.56706  |
| H | 6.78274  | 0.89577  | 0.47765  |
| H | 4.92868  | -2.65679 | 0.90829  |

|   |          |          |          |
|---|----------|----------|----------|
| H | 4.28965  | -1.27344 | 1.81941  |
| H | 2.79957  | -1.76414 | -0.07930 |
| H | 4.16183  | -1.67613 | -1.21203 |
| C | -3.65837 | 0.42615  | 0.18860  |
| C | -3.78263 | -0.94240 | -0.17008 |
| C | -5.04645 | -1.55053 | -0.10849 |
| C | -6.13993 | -0.83449 | 0.29500  |
| C | -6.02029 | 0.52016  | 0.65295  |
| C | -4.80593 | 1.13823  | 0.60155  |
| H | -5.14116 | -2.59479 | -0.38489 |
| H | -7.11102 | -1.31268 | 0.34056  |
| H | -6.89842 | 1.06929  | 0.96933  |
| H | -4.70387 | 2.18298  | 0.87492  |

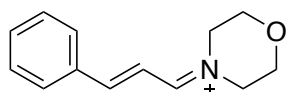

### Iminium 35

M06/def2-TZVP Geometry

|   |          |          |          |
|---|----------|----------|----------|
| C | 2.93991  | 1.05268  | -0.11750 |
| C | 2.63517  | -0.31094 | 0.01098  |
| C | 3.68228  | -1.22233 | 0.20508  |
| C | 4.98896  | -0.78982 | 0.26923  |
| C | 1.30168  | -0.81697 | -0.04758 |
| C | 0.14632  | -0.12021 | -0.22686 |
| C | -1.06787 | -0.82026 | -0.26153 |
| H | -1.02020 | -1.90212 | -0.14838 |
| N | -2.26962 | -0.34317 | -0.42284 |
| C | -3.45186 | -1.21051 | -0.43858 |
| C | -4.44798 | -0.71954 | 0.59356  |
| O | -4.77326 | 0.62110  | 0.36124  |
| C | -3.65008 | 1.44592  | 0.46699  |
| C | -2.60560 | 1.07443  | -0.57082 |
| H | 2.14905  | 1.77788  | -0.26902 |
| H | 3.45211  | -2.27780 | 0.30475  |
| H | 5.79112  | -1.50110 | 0.41933  |
| H | 0.16301  | 0.95549  | -0.34839 |
| H | -3.89662 | -1.15376 | -1.43696 |
| H | -3.14439 | -2.23855 | -0.24538 |
| H | -4.03142 | -0.84839 | 1.60471  |
| H | -5.36735 | -1.30226 | 0.52654  |
| H | -3.97592 | 2.47430  | 0.30662  |
| H | -3.21078 | 1.37735  | 1.47443  |
| H | -1.71400 | 1.68805  | -0.46585 |
| H | -3.01367 | 1.21519  | -1.57638 |

|   |         |          |          |
|---|---------|----------|----------|
| C | 4.24420 | 1.48086  | -0.05312 |
| C | 5.26966 | 0.56118  | 0.14023  |
| H | 6.29589 | 0.90513  | 0.18999  |
| H | 4.47499 | 2.53398  | -0.15304 |
| H | 1.21285 | -1.89705 | 0.06645  |

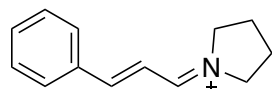

### Iminium 36

M06/def2-TZVP Geometry

|   |          |          |          |
|---|----------|----------|----------|
| C | -2.59415 | 1.06236  | 0.02103  |
| C | -2.31039 | -0.31138 | -0.00739 |
| C | -3.37579 | -1.22196 | -0.00920 |
| C | -4.68034 | -0.77902 | 0.01648  |
| C | -0.97970 | -0.82821 | -0.03477 |
| C | 0.19118  | -0.13545 | -0.03849 |
| C | 1.40518  | -0.83787 | -0.06587 |
| H | 1.37023  | -1.92623 | -0.08087 |
| N | 2.59247  | -0.31415 | -0.07091 |
| C | 3.84104  | -1.09987 | -0.08061 |
| C | 4.87431  | -0.10694 | 0.40635  |
| C | 4.39029  | 1.19972  | -0.20521 |
| C | 2.88355  | 1.13045  | -0.03344 |
| H | -1.78812 | 1.78670  | 0.02289  |
| H | -3.16151 | -2.28522 | -0.03121 |
| H | -5.49683 | -1.48987 | 0.01479  |
| H | 0.20323  | 0.94803  | -0.01707 |
| H | 3.72602  | -1.98847 | 0.54014  |
| H | 4.04675  | -1.41479 | -1.10859 |
| H | 2.32380  | 1.64599  | -0.81560 |
| H | 2.56149  | 1.52262  | 0.93647  |
| C | -3.89642 | 1.50098  | 0.04665  |
| C | -4.94043 | 0.58191  | 0.04437  |
| H | -5.96486 | 0.93414  | 0.06449  |
| H | -4.11105 | 2.56201  | 0.06848  |
| H | -0.90668 | -1.91532 | -0.05582 |
| H | 5.88280  | -0.37926 | 0.10059  |
| H | 4.85757  | -0.04976 | 1.49788  |
| H | 4.81428  | 2.08358  | 0.26775  |
| H | 4.64556  | 1.23669  | -1.26721 |

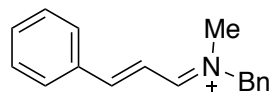

**Iminium 37**

M06/def2-TZVP Geometry

|   |          |          |          |
|---|----------|----------|----------|
| C | -3.87843 | 0.75706  | -0.00001 |
| C | -3.00510 | -0.34049 | -0.00000 |
| C | -3.54514 | -1.63329 | -0.00001 |
| C | -4.90972 | -1.82666 | -0.00002 |
| C | -1.58277 | -0.20163 | 0.00001  |
| C | -0.85100 | 0.94431  | 0.00000  |
| C | 0.55102  | 0.85643  | 0.00002  |
| H | 1.00655  | -0.13159 | 0.00003  |
| N | 1.38202  | 1.85629  | 0.00001  |
| C | 2.85823  | 1.68553  | 0.00000  |
| C | 0.91456  | 3.23778  | -0.00000 |
| H | -3.48606 | 1.76723  | -0.00000 |
| H | -2.87387 | -2.48556 | 0.00000  |
| H | -5.31729 | -2.82961 | -0.00003 |
| H | -1.33422 | 1.91403  | -0.00002 |
| H | 3.22502  | 2.22128  | 0.88109  |
| H | 0.31657  | 3.43950  | -0.88993 |
| H | 0.31647  | 3.43948  | 0.88986  |
| C | -5.23906 | 0.56112  | -0.00002 |
| C | -5.75632 | -0.72977 | -0.00003 |
| H | -6.82968 | -0.87751 | -0.00004 |
| H | -5.90932 | 1.41151  | -0.00003 |
| H | -1.02682 | -1.13875 | 0.00003  |
| H | 1.77511  | 3.90205  | 0.00006  |
| H | 3.22501  | 2.22128  | -0.88109 |
| C | 4.14389  | -2.38058 | 0.00001  |
| C | 3.94030  | -1.71994 | 1.20062  |
| C | 3.53031  | -0.39858 | 1.20025  |
| C | 3.32131  | 0.27050  | 0.00001  |
| C | 3.53030  | -0.39858 | -1.20023 |
| C | 3.94029  | -1.71995 | -1.20060 |
| H | 4.47354  | -3.41247 | 0.00001  |
| H | 4.11261  | -2.23226 | 2.13922  |
| H | 3.38173  | 0.12505  | 2.14000  |
| H | 3.38172  | 0.12504  | -2.13999 |
| H | 4.11260  | -2.23227 | -2.13919 |

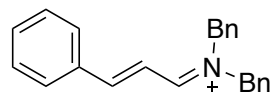

**Iminium 38**

M06/def2-TZVP Geometry

|   |          |          |          |
|---|----------|----------|----------|
| C | 4.69513  | 1.05791  | 0.39700  |
| C | 3.74466  | 0.12646  | -0.03896 |
| C | 4.14851  | -1.19791 | -0.25966 |
| C | 5.45564  | -1.56936 | -0.04952 |
| C | 2.40026  | 0.57394  | -0.23997 |
| C | 1.33019  | -0.15120 | -0.65590 |
| C | 0.08586  | 0.49265  | -0.79029 |
| H | 0.03937  | 1.54852  | -0.52763 |
| N | -1.04094 | -0.02003 | -1.18388 |
| C | -2.28778 | 0.78309  | -1.26925 |
| C | -1.21474 | -1.42527 | -1.57016 |
| H | 4.38809  | 2.08413  | 0.56904  |
| H | 3.43308  | -1.93829 | -0.59801 |
| H | 5.76216  | -2.59350 | -0.22173 |
| H | 1.42826  | -1.20789 | -0.87325 |
| H | -3.08873 | 0.10711  | -0.95556 |
| H | -1.78519 | -1.43251 | -2.50303 |
| C | 6.00514  | 0.68294  | 0.60633  |
| C | 6.38534  | -0.63045 | 0.38315  |
| H | 7.41396  | -0.92919 | 0.54614  |
| H | 6.73222  | 1.41102  | 0.94299  |
| H | 2.22864  | 1.62947  | -0.03129 |
| H | -0.23654 | -1.85065 | -1.79381 |
| H | -2.44758 | 1.01243  | -2.32775 |
| C | -2.25647 | 4.29735  | 1.14790  |
| C | -2.43079 | 3.05109  | 1.73145  |
| C | -2.44501 | 1.91641  | 0.94300  |
| C | -2.28268 | 2.01813  | -0.43502 |
| C | -2.10729 | 3.26797  | -1.01215 |
| C | -2.09656 | 4.40627  | -0.22220 |
| H | -2.25433 | 5.18748  | 1.76528  |
| H | -2.56795 | 2.96774  | 2.80271  |
| H | -2.59288 | 0.93760  | 1.39210  |
| H | -1.99169 | 3.35183  | -2.08843 |
| H | -1.97058 | 5.37993  | -0.67967 |
| C | -3.26753 | -3.67063 | 1.43809  |
| C | -2.13408 | -2.94467 | 1.76911  |
| C | -1.47185 | -2.21540 | 0.79896  |
| C | -1.93879 | -2.20438 | -0.51036 |
| C | -3.07827 | -2.92632 | -0.83303 |
| C | -3.73839 | -3.66163 | 0.13736  |

|   |          |          |          |
|---|----------|----------|----------|
| H | -3.78472 | -4.24335 | 2.19813  |
| H | -1.76323 | -2.95150 | 2.78690  |
| H | -0.58369 | -1.64943 | 1.06629  |
| H | -3.44955 | -2.91745 | -1.85312 |
| H | -4.62551 | -4.22519 | -0.12444 |

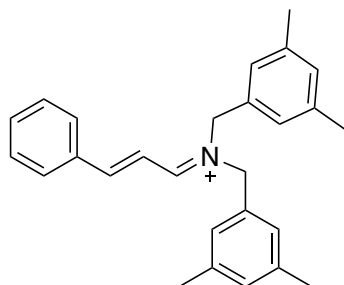

### Iminium 39

#### M06/def2-TZVP Geometry

|   |          |          |          |
|---|----------|----------|----------|
| C | 5.22295  | 0.20595  | 0.39491  |
| C | 4.16250  | -0.56047 | -0.10272 |
| C | 4.37099  | -1.92543 | -0.34311 |
| C | 5.59699  | -2.49585 | -0.09175 |
| C | 2.90931  | 0.09045  | -0.34345 |
| C | 1.76181  | -0.45517 | -0.81852 |
| C | 0.63333  | 0.37268  | -0.98162 |
| H | 0.73372  | 1.41785  | -0.69179 |
| N | -0.53866 | 0.04407  | -1.43122 |
| C | -1.64691 | 1.02835  | -1.53521 |
| C | -0.90685 | -1.31023 | -1.86133 |
| H | 5.06745  | 1.26320  | 0.58226  |
| H | 3.56702  | -2.54103 | -0.72938 |
| H | 5.75206  | -3.55093 | -0.27962 |
| H | 1.70795  | -1.50989 | -1.05957 |
| H | -2.55044 | 0.47412  | -1.26441 |
| H | -1.42980 | -1.21067 | -2.81649 |
| C | 6.45132  | -0.36809 | 0.64556  |
| C | 6.63844  | -1.71895 | 0.40246  |
| H | 7.60215  | -2.17391 | 0.59777  |
| H | 7.26478  | 0.23419  | 1.02995  |
| H | 2.89004  | 1.15517  | -0.11311 |
| H | 0.00450  | -1.87574 | -2.05494 |
| H | -1.73178 | 1.30078  | -2.59213 |
| C | -1.13930 | 4.42010  | 0.96485  |
| C | -0.92874 | 4.56369  | -0.39748 |
| C | -1.09907 | 3.44521  | -1.20971 |
| C | -1.48234 | 2.22971  | -0.66906 |
| C | -1.69308 | 2.11644  | 0.70102  |
| C | -1.52529 | 3.20965  | 1.53537  |

|   |          |          |          |
|---|----------|----------|----------|
| H | -1.00519 | 5.28372  | 1.61136  |
| C | -0.56107 | 5.88569  | -0.98661 |
| H | -0.93870 | 3.53301  | -2.28143 |
| H | -1.99785 | 1.15851  | 1.11790  |
| C | -1.77539 | 3.11302  | 3.00438  |
| C | -3.40372 | -3.25171 | 0.98798  |
| C | -3.83119 | -3.16117 | -0.32613 |
| C | -3.00682 | -2.51252 | -1.24258 |
| C | -1.78758 | -1.98943 | -0.85311 |
| C | -1.38199 | -2.09600 | 0.47279  |
| C | -2.18490 | -2.72669 | 1.40924  |
| H | -4.04112 | -3.74518 | 1.71713  |
| C | -5.13028 | -3.75377 | -0.76237 |
| H | -3.32819 | -2.42117 | -2.27711 |
| H | -0.42862 | -1.67839 | 0.78889  |
| C | -1.76538 | -2.85396 | 2.83694  |
| H | -1.63942 | -3.90280 | 3.11571  |
| H | -0.82204 | -2.34173 | 3.02881  |
| H | -2.52028 | -2.43808 | 3.50793  |
| H | -4.97150 | -4.72153 | -1.24558 |
| H | -5.80039 | -3.91636 | 0.08182  |
| H | -5.63875 | -3.11433 | -1.48596 |
| H | -1.87139 | 2.07685  | 3.33016  |
| H | -0.97054 | 3.57940  | 3.57576  |
| H | -2.69835 | 3.63175  | 3.27550  |
| H | 0.07877  | 5.77191  | -1.86302 |
| H | -1.45494 | 6.42631  | -1.30923 |
| H | -0.04505 | 6.51747  | -0.26307 |

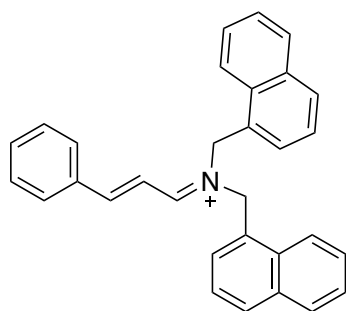

### Iminium 40

M06/def2-TZVP Geometry

|   |          |          |          |
|---|----------|----------|----------|
| C | -4.67891 | -1.76619 | -0.34470 |
| C | -4.38008 | -0.41788 | -0.10523 |
| C | -5.37424 | 0.40770  | 0.43334  |
| C | -6.62561 | -0.09299 | 0.72400  |

|   |          |          |          |
|---|----------|----------|----------|
| C | -3.09971 | 0.15843  | -0.38748 |
| C | -2.00440 | -0.45133 | -0.90741 |
| C | -0.83803 | 0.31381  | -1.10722 |
| H | -0.89343 | 1.37154  | -0.85425 |
| N | 0.31546  | -0.07298 | -1.56012 |
| C | 1.42740  | 0.89082  | -1.78198 |
| C | 0.61500  | -1.45694 | -1.98530 |
| H | -3.92748 | -2.42686 | -0.76108 |
| H | -5.14833 | 1.45218  | 0.62050  |
| H | -7.38720 | 0.55437  | 1.14002  |
| H | -2.03240 | -1.50102 | -1.17181 |
| H | 1.57698  | 0.93579  | -2.86609 |
| H | -0.24702 | -2.08019 | -1.75376 |
| C | -5.92792 | -2.26323 | -0.05423 |
| C | -6.90259 | -1.42824 | 0.48018  |
| H | -7.88474 | -1.82559 | 0.70676  |
| H | -6.15320 | -3.30562 | -0.24193 |
| H | -3.00768 | 1.21801  | -0.15127 |
| H | 0.72041  | -1.43602 | -3.07428 |
| H | 2.32100  | 0.42416  | -1.36170 |
| C | 0.80288  | 4.84697  | -0.26724 |
| C | 0.68297  | 4.58741  | -1.60004 |
| C | 0.88407  | 3.28197  | -2.07467 |
| C | 1.20697  | 2.25494  | -1.22582 |
| H | 0.65265  | 5.85128  | 0.11446  |
| H | 0.79458  | 3.08341  | -3.13824 |
| C | 4.27647  | -2.94734 | -0.31837 |
| C | 4.17335  | -2.68606 | -1.65175 |
| C | 2.96353  | -2.20296 | -2.17292 |
| C | 1.86890  | -2.00278 | -1.37356 |
| H | 5.20817  | -3.30918 | 0.10293  |
| H | 2.89429  | -1.97833 | -3.23316 |
| H | 5.01864  | -2.83967 | -2.31064 |
| H | 0.43920  | 5.38029  | -2.29596 |
| C | 1.94081  | -2.29664 | 0.01560  |
| C | 3.17633  | -2.76031 | 0.54445  |
| C | 3.27798  | -3.03277 | 1.92421  |
| C | 2.20850  | -2.86771 | 2.75484  |
| C | 0.98111  | -2.42834 | 2.23392  |
| C | 0.85146  | -2.14985 | 0.90242  |
| H | 4.22830  | -3.38406 | 2.31147  |
| H | 2.29883  | -3.08432 | 3.81219  |
| H | 0.12913  | -2.31399 | 2.89357  |
| H | -0.11127 | -1.81561 | 0.53315  |
| C | 1.34209  | 2.50108  | 0.16980  |
| C | 1.13073  | 3.82313  | 0.64663  |



|   |         |         |         |
|---|---------|---------|---------|
| C | 1.25883 | 4.08690 | 2.02572 |
| C | 1.57683 | 3.09253 | 2.90401 |
| C | 1.78527 | 1.78541 | 2.43601 |
| C | 1.67148 | 1.49598 | 1.10522 |
| H | 1.10170 | 5.10215 | 2.37392 |
| H | 1.67502 | 3.30833 | 3.96087 |
| H | 2.04725 | 0.99934 | 3.13464 |
| H | 1.84947 | 0.47737 | 0.77587 |

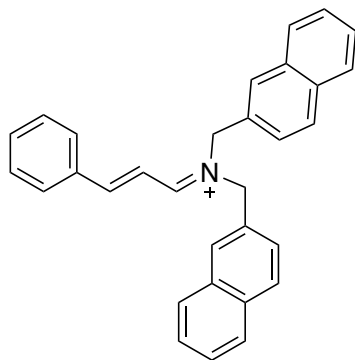

### Iminium 41

M06/def2-TZVP Geometry

|   |          |          |          |
|---|----------|----------|----------|
| C | -4.77767 | -2.99056 | 0.58053  |
| C | -3.48048 | -3.10587 | 0.06638  |
| C | -2.92659 | -4.38425 | -0.08789 |
| C | -3.64901 | -5.50107 | 0.26160  |
| C | -2.77945 | -1.90625 | -0.27986 |
| C | -1.52754 | -1.78688 | -0.79015 |
| C | -1.02812 | -0.49943 | -1.06581 |
| H | -1.67453 | 0.34683  | -0.83517 |
| N | 0.12808  | -0.17662 | -1.56031 |
| C | 0.49993  | 1.24319  | -1.79617 |
| C | 1.17587  | -1.14517 | -1.91490 |
| H | -5.21133 | -2.00352 | 0.70172  |
| H | -1.92483 | -4.50144 | -0.48445 |
| H | -3.21604 | -6.48609 | 0.14003  |
| H | -0.92027 | -2.66387 | -0.97829 |
| H | 0.28198  | 1.46750  | -2.84496 |
| H | 0.72212  | -2.13238 | -2.00164 |
| C | -5.50003 | -4.11182 | 0.92965  |
| C | -4.93592 | -5.36699 | 0.77024  |
| H | -5.50031 | -6.25068 | 1.04304  |
| H | -6.50254 | -4.01129 | 1.32588  |
| H | -3.33169 | -0.98275 | -0.10890 |
| H | 1.54442  | -0.87105 | -2.90700 |

|   |          |          |          |
|---|----------|----------|----------|
| H | 1.58563  | 1.28110  | -1.66784 |
| C | -1.11917 | 3.07777  | -1.33150 |
| C | -0.17154 | 2.20294  | -0.87655 |
| H | -1.39063 | 3.09045  | -2.38409 |
| C | 3.02151  | -1.39611 | 1.36408  |
| C | 2.01848  | -1.40894 | 0.44147  |
| C | 2.29123  | -1.12426 | -0.91468 |
| H | 1.00265  | -1.63915 | 0.75020  |
| H | 2.81243  | -1.61876 | 2.40506  |
| C | 3.56929  | -0.82898 | -1.30051 |
| C | 0.18264  | 2.19926  | 0.49213  |
| C | -0.41531 | 3.06281  | 1.35907  |
| H | 3.78737  | -0.60632 | -2.34210 |
| H | 0.94529  | 1.50677  | 0.83950  |
| H | -0.13762 | 3.06844  | 2.40778  |
| C | -1.39382 | 3.97974  | 0.91426  |
| C | -1.75076 | 3.98971  | -0.45925 |
| C | -2.72078 | 4.90723  | -0.90903 |
| C | -3.31120 | 5.77606  | -0.03701 |
| C | -2.95789 | 5.76678  | 1.32350  |
| C | -2.02079 | 4.88909  | 1.78827  |
| H | -2.98667 | 4.91413  | -1.96089 |
| H | -4.05364 | 6.48055  | -0.39189 |
| H | -3.43215 | 6.46426  | 2.00332  |
| H | -1.74219 | 4.88178  | 2.83662  |
| C | 4.35063  | -1.10264 | 0.98972  |
| C | 4.63035  | -0.81555 | -0.37163 |
| C | 5.95492  | -0.52214 | -0.75198 |
| C | 6.95683  | -0.51416 | 0.17490  |
| C | 6.68018  | -0.79862 | 1.52369  |
| C | 5.40651  | -1.08608 | 1.92203  |
| H | 6.16444  | -0.30485 | -1.79403 |
| H | 7.97274  | -0.28912 | -0.12632 |
| H | 7.48605  | -0.78954 | 2.24756  |
| H | 5.18892  | -1.30757 | 2.96141  |

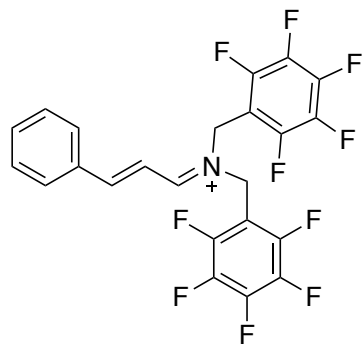

### Iminium 42

#### M06/def2-TZVP Geometry

|   |          |          |          |
|---|----------|----------|----------|
| C | 4.03530  | -3.99991 | -1.12586 |
| C | 3.43286  | -2.93719 | -0.43707 |
| C | 4.05647  | -2.43525 | 0.71673  |
| C | 5.23586  | -2.98436 | 1.15925  |
| C | 2.20874  | -2.41358 | -0.94568 |
| C | 1.44491  | -1.41360 | -0.42029 |
| C | 0.26821  | -1.04665 | -1.07957 |
| H | 0.00118  | -1.59872 | -1.97835 |
| N | -0.57388 | -0.10785 | -0.73665 |
| C | -1.82410 | 0.08653  | -1.49615 |
| C | -0.37239 | 0.74232  | 0.45280  |
| H | 3.55735  | -4.38854 | -2.01882 |
| H | 3.61507  | -1.60894 | 1.26234  |
| H | 5.71554  | -2.59449 | 2.04816  |
| H | 1.73321  | -0.92467 | 0.50053  |
| H | -1.74743 | -0.51199 | -2.40474 |
| H | -1.31538 | 1.26384  | 0.62159  |
| C | 5.21648  | -4.54865 | -0.67771 |
| C | 5.81589  | -4.04103 | 0.46444  |
| H | 6.74591  | -4.46885 | 0.81954  |
| H | 5.67413  | -5.37001 | -1.21416 |
| H | 1.85187  | -2.87684 | -1.86518 |
| H | -0.20322 | 0.10187  | 1.31936  |
| H | -1.88692 | 1.13337  | -1.78896 |
| C | -3.30047 | -1.64327 | -0.45271 |
| C | -3.02872 | -0.30604 | -0.70278 |
| F | -2.46259 | -2.56347 | -0.91188 |
| C | 1.66061  | 3.73467  | -0.70444 |
| C | 0.66688  | 2.78116  | -0.59104 |
| C | 0.74446  | 1.73401  | 0.31582  |
| F | -0.39815 | 2.88184  | -1.37259 |
| F | 1.55532  | 4.70921  | -1.57344 |
| C | 1.86702  | 1.68643  | 1.12847  |

|   |          |          |          |
|---|----------|----------|----------|
| C | -3.92316 | 0.63377  | -0.21218 |
| C | -5.05377 | 0.26111  | 0.49447  |
| F | 1.99397  | 0.71652  | 2.02717  |
| F | -3.70140 | 1.92141  | -0.41563 |
| F | -5.88535 | 1.16667  | 0.94753  |
| C | -5.29809 | -1.08408 | 0.72597  |
| C | -4.41708 | -2.04684 | 0.25170  |
| C | 2.77487  | 3.65321  | 0.11849  |
| C | 2.87951  | 2.62468  | 1.04114  |
| F | 3.93100  | 2.54153  | 1.82103  |
| F | 3.72427  | 4.54519  | 0.02323  |
| F | -4.64979 | -3.31817 | 0.47177  |
| F | -6.35905 | -1.44803 | 1.39530  |

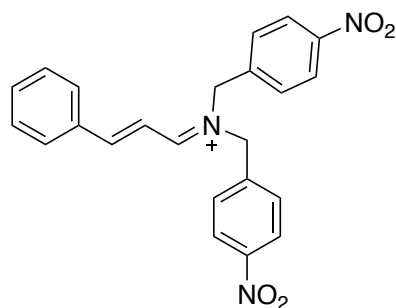

### Iminium 43

M06/def2-TZVP Geometry

|   |          |          |          |
|---|----------|----------|----------|
| C | -5.08456 | -1.91523 | -0.69477 |
| C | -3.84993 | -2.27937 | -0.13895 |
| C | -3.52389 | -3.64141 | -0.04702 |
| C | -4.40361 | -4.59644 | -0.49668 |
| C | -2.98004 | -1.24097 | 0.30872  |
| C | -1.74509 | -1.36219 | 0.87073  |
| C | -1.05501 | -0.19908 | 1.24121  |
| H | -1.54167 | 0.75350  | 1.03827  |
| N | 0.12166  | -0.10353 | 1.79446  |
| C | 0.72960  | 1.20723  | 2.12604  |
| C | 0.95146  | -1.25566 | 2.15750  |
| H | -5.34122 | -0.86371 | -0.76775 |
| H | -2.57674 | -3.94952 | 0.38001  |
| H | -4.14871 | -5.64621 | -0.42403 |
| H | -1.29992 | -2.33840 | 1.02057  |
| H | 1.80874  | 1.06958  | 2.01110  |
| H | 1.32013  | -1.08261 | 3.17225  |
| C | -5.96441 | -2.87541 | -1.14432 |
| C | -5.62385 | -4.21519 | -1.04533 |
| H | -6.31311 | -4.97333 | -1.39765 |

|   |          |          |          |
|---|----------|----------|----------|
| H | -6.91549 | -2.58507 | -1.57213 |
| H | -3.36374 | -0.22929 | 0.17988  |
| H | 0.32234  | -2.14484 | 2.19953  |
| H | 0.53671  | 1.40276  | 3.18555  |
| C | -0.57847 | 3.31600  | 1.77769  |
| C | 0.25962  | 2.33475  | 1.26687  |
| C | 2.93157  | -1.66932 | -1.03859 |
| C | 1.87887  | -1.48516 | -0.16470 |
| C | 2.10173  | -1.43684 | 1.20769  |
| C | 3.39256  | -1.57119 | 1.69889  |
| C | 0.66990  | 2.39861  | -0.06181 |
| C | 0.24374  | 3.42738  | -0.87633 |
| C | -0.59450 | 4.38746  | -0.34105 |
| C | -1.01073 | 4.35585  | 0.97262  |
| C | 4.20437  | -1.80627 | -0.51991 |
| C | 4.45588  | -1.76232 | 0.83467  |
| H | 3.57103  | -1.53059 | 2.76825  |
| H | 5.47097  | -1.87146 | 1.19297  |
| H | 2.78669  | -1.71424 | -2.10984 |
| H | 0.87326  | -1.38018 | -0.56063 |
| H | 1.33806  | 1.63709  | -0.45436 |
| H | 0.55215  | 3.50688  | -1.91033 |
| H | -1.65901 | 5.13748  | 1.34598  |
| H | -0.88856 | 3.27528  | 2.81660  |
| N | -1.06384 | 5.49113  | -1.21329 |
| O | -0.68437 | 5.48121  | -2.35855 |
| O | -1.79387 | 6.31088  | -0.71315 |
| N | 5.33807  | -2.00275 | -1.45405 |
| O | 5.07758  | -2.02241 | -2.63246 |
| O | 6.43387  | -2.12697 | -0.96621 |

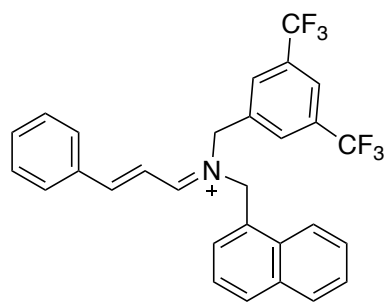

#### Iminium 44

M06/def2-TZVP Geometry

|   |         |          |          |
|---|---------|----------|----------|
| C | 3.98653 | -3.27682 | -0.85824 |
| C | 4.38617 | -1.96776 | -0.55229 |
| C | 5.67135 | -1.75713 | -0.03607 |
| C | 6.53029 | -2.81549 | 0.16840  |

|   |          |          |          |
|---|----------|----------|----------|
| C | 3.53928  | -0.83199 | -0.74216 |
| C | 2.26830  | -0.80565 | -1.22422 |
| C | 1.60894  | 0.43156  | -1.32486 |
| H | 2.15229  | 1.31854  | -1.00277 |
| N | 0.40340  | 0.66367  | -1.75491 |
| C | -0.18284 | 2.03111  | -1.78670 |
| C | -0.50617 | -0.37866 | -2.23715 |
| H | 2.99755  | -3.46715 | -1.25839 |
| H | 5.98500  | -0.74641 | 0.20262  |
| H | 7.52160  | -2.64256 | 0.56768  |
| H | 1.76982  | -1.72257 | -1.51553 |
| H | -1.17824 | 1.93715  | -1.33988 |
| H | -0.97437 | -0.00069 | -3.14970 |
| C | 4.84508  | -4.33055 | -0.65268 |
| C | 6.11721  | -4.10170 | -0.13971 |
| H | 6.78937  | -4.93634 | 0.01994  |
| H | 4.53169  | -5.33947 | -0.88985 |
| H | 3.97777  | 0.12479  | -0.46071 |
| H | 0.07858  | -1.25350 | -2.52170 |
| H | -0.32951 | 2.27540  | -2.84314 |
| C | 1.33723  | 3.96793  | -1.89433 |
| C | 0.62846  | 3.08595  | -1.11901 |
| C | -3.87038 | -0.97535 | -0.61333 |
| C | -2.90156 | -0.64150 | -1.54619 |
| C | -1.55800 | -0.72553 | -1.22194 |
| C | -1.19660 | -1.13984 | 0.05171  |
| C | 2.16748  | 5.10862  | 0.03585  |
| C | 2.11076  | 4.98815  | -1.32081 |
| C | -3.50942 | -1.38698 | 0.65558  |
| C | -2.16643 | -1.46443 | 0.98269  |
| H | -0.14963 | -1.20639 | 0.33562  |
| C | -1.71267 | -1.88650 | 2.35311  |
| C | -5.31580 | -0.86270 | -1.02147 |
| H | -3.20470 | -0.31562 | -2.53689 |
| H | 2.65132  | 5.67593  | -1.95872 |
| H | 1.28820  | 3.88259  | -2.97549 |
| H | 2.75784  | 5.89442  | 0.49495  |
| C | 0.66941  | 3.19184  | 0.29974  |
| C | 1.45833  | 4.22442  | 0.87586  |
| C | 1.51215  | 4.35042  | 2.27895  |
| C | 0.82276  | 3.49504  | 3.08739  |
| C | 0.04383  | 2.47290  | 2.52271  |
| C | -0.03028 | 2.32322  | 1.16586  |
| H | 2.11275  | 5.14805  | 2.70276  |
| H | 0.86878  | 3.60346  | 4.16396  |
| H | -0.50826 | 1.80085  | 3.16794  |

|   |          |          |          |
|---|----------|----------|----------|
| H | -0.65417 | 1.53204  | 0.76074  |
| H | -4.26721 | -1.64309 | 1.38428  |
| F | -5.56663 | -1.63394 | -2.07630 |
| F | -6.13823 | -1.21639 | -0.04809 |
| F | -5.60482 | 0.38976  | -1.37145 |
| F | -2.72064 | -2.20788 | 3.14328  |
| F | -0.89212 | -2.93295 | 2.28073  |
| F | -1.02877 | -0.89868 | 2.94031  |

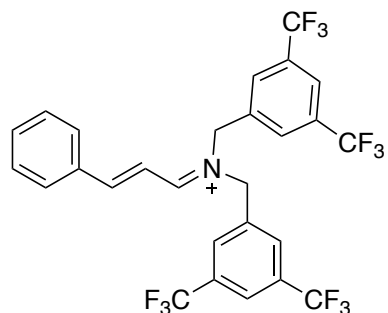

### Iminium 45

#### M06/def2-TZVP Geometry

|   |          |          |          |
|---|----------|----------|----------|
| C | -6.13994 | -0.29712 | -1.24202 |
| C | -5.99983 | -1.01713 | -0.04489 |
| C | -7.12092 | -1.18176 | 0.78177  |
| C | -8.34015 | -0.64778 | 0.42757  |
| C | -4.76474 | -1.59128 | 0.37457  |
| C | -3.56109 | -1.55677 | -0.26489 |
| C | -2.46156 | -2.19249 | 0.32569  |
| H | -2.62796 | -2.68380 | 1.28296  |
| N | -1.24042 | -2.27753 | -0.12957 |
| C | -0.20777 | -3.01914 | 0.62133  |
| C | -0.81582 | -1.68756 | -1.40756 |
| H | -5.28898 | -0.15420 | -1.89755 |
| H | -7.01694 | -1.73669 | 1.70811  |
| H | -9.20037 | -0.77935 | 1.07140  |
| H | -3.45182 | -1.04106 | -1.21151 |
| H | 0.05228  | -3.90566 | 0.03516  |
| H | -0.08354 | -2.36991 | -1.84550 |
| C | -7.35753 | 0.23451  | -1.59166 |
| C | -8.45802 | 0.05983  | -0.75849 |
| H | -9.41532 | 0.48186  | -1.04038 |
| H | -7.46205 | 0.79014  | -2.51500 |
| H | -4.80042 | -2.11965 | 1.32696  |
| H | -1.67579 | -1.68162 | -2.07995 |
| H | -0.66611 | -3.35741 | 1.55309  |

|   |          |          |          |
|---|----------|----------|----------|
| C | 0.94738  | -1.10642 | 1.74976  |
| C | 1.01301  | -2.19070 | 0.88075  |
| C | -0.28242 | 1.92773  | -0.39781 |
| C | -0.85912 | 0.67762  | -0.54204 |
| C | -0.21533 | -0.31440 | -1.26238 |
| C | 1.00752  | -0.03163 | -1.85269 |
| C | 3.24092  | -0.57527 | 1.27024  |
| C | 2.05323  | -0.30627 | 1.94074  |
| C | 0.93607  | 2.20900  | -0.98481 |
| C | 1.57468  | 1.22325  | -1.71828 |
| H | 1.53073  | -0.79662 | -2.41743 |
| C | 2.93709  | 1.48818  | -2.30361 |
| C | -1.02436 | 2.95512  | 0.41315  |
| H | -1.81242 | 0.48680  | -0.05864 |
| H | 0.02320  | -0.88005 | 2.27342  |
| H | 4.10473  | 0.06257  | 1.41618  |
| C | 2.19819  | -2.46702 | 0.22856  |
| C | 3.30904  | -1.65556 | 0.41774  |
| C | 4.56113  | -1.97942 | -0.35268 |
| F | 4.97576  | -3.21351 | -0.08036 |
| H | 1.39004  | 3.18448  | -0.86476 |
| F | -2.17997 | 3.27200  | -0.17356 |
| F | -1.32509 | 2.47020  | 1.62035  |
| F | -0.33004 | 4.06497  | 0.57875  |
| F | 3.10505  | 2.76783  | -2.59618 |
| F | 3.88846  | 1.14736  | -1.42830 |
| F | 3.14021  | 0.77967  | -3.40624 |
| F | 5.54638  | -1.14261 | -0.08608 |
| F | 4.31793  | -1.92933 | -1.66572 |
| H | 2.26643  | -3.31540 | -0.44708 |
| C | 1.99752  | 0.89394  | 2.84800  |
| F | 3.04774  | 0.93644  | 3.65455  |
| F | 2.00210  | 2.02016  | 2.12924  |
| F | 0.90197  | 0.89899  | 3.59589  |



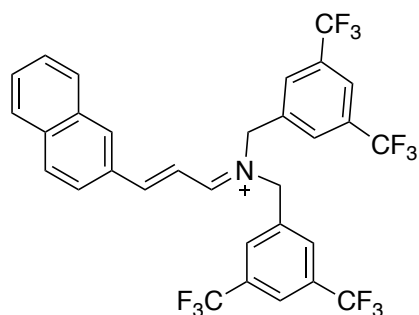

### Iminium 46

M06/def2-TZVP Geometry

|   |          |          |          |
|---|----------|----------|----------|
| C | -5.29833 | -0.20845 | -1.32459 |
| C | -5.17031 | -1.00728 | -0.15275 |
| C | -6.29096 | -1.22085 | 0.63986  |
| C | -3.94868 | -1.60140 | 0.25197  |
| C | -2.73308 | -1.52991 | -0.37222 |
| C | -1.64216 | -2.19539 | 0.18990  |
| H | -1.81525 | -2.73653 | 1.11858  |
| N | -0.41376 | -2.25986 | -0.25978 |
| C | 0.60968  | -3.03920 | 0.46032  |
| C | 0.01954  | -1.61150 | -1.50429 |
| H | -4.43576 | -0.02811 | -1.95435 |
| H | -6.20196 | -1.82812 | 1.53630  |
| H | -2.61717 | -0.96113 | -1.28705 |
| H | 0.87637  | -3.89656 | -0.16532 |
| H | 0.74996  | -2.27560 | -1.97301 |
| C | -6.49531 | 0.33191  | -1.65707 |
| H | -6.59285 | 0.94144  | -2.54865 |
| H | -3.99577 | -2.18258 | 1.17226  |
| H | -0.83741 | -1.56689 | -2.17931 |
| H | 0.14371  | -3.42329 | 1.37035  |
| C | 1.75357  | -1.17542 | 1.68043  |
| C | 1.82952  | -2.22700 | 0.77249  |
| C | 2.43312  | 1.29336  | -1.65973 |
| C | 1.85650  | 0.05202  | -1.86120 |
| C | 0.62820  | -0.25063 | -1.29191 |
| C | -0.01054 | 0.70810  | -0.52365 |
| C | 4.05518  | -0.63280 | 1.25461  |
| C | 2.85738  | -0.38488 | 1.91580  |
| C | 1.79928  | 2.24517  | -0.87864 |
| C | 0.57643  | 1.94392  | -0.31145 |
| H | -0.96659 | 0.49873  | -0.05341 |
| C | -0.15297 | 2.92821  | 0.56141  |
| C | 3.80309  | 1.57716  | -2.21699 |
| H | 2.37844  | -0.68982 | -2.45746 |

|   |           |          |          |
|---|-----------|----------|----------|
| H | 0.82081   | -0.96409 | 2.19486  |
| H | 4.91659   | 0.00002  | 1.43405  |
| C | 3.02345   | -2.48142 | 0.12816  |
| C | 4.13385   | -1.68139 | 0.36481  |
| C | 5.39492   | -1.97767 | -0.40107 |
| F | 6.38127   | -1.15994 | -0.08313 |
| H | 2.26177   | 3.20858  | -0.70536 |
| F | 4.02253   | 0.90772  | -3.34071 |
| F | 3.97539   | 2.86655  | -2.46263 |
| F | 4.74249   | 1.20636  | -1.34057 |
| F | 0.54473   | 4.02855  | 0.77383  |
| F | -1.31762  | 3.27542  | 0.01133  |
| F | -0.43368  | 2.38133  | 1.74696  |
| F | 5.17152   | -1.86717 | -1.71389 |
| F | 5.79959   | -3.22537 | -0.17908 |
| H | 3.09898   | -3.30234 | -0.57984 |
| C | 2.79544   | 0.78245  | 2.86406  |
| F | 3.77810   | 0.73090  | 3.75264  |
| F | 2.92430   | 1.93205  | 2.19629  |
| F | 1.64518   | 0.82727  | 3.52291  |
| C | -7.53565  | -0.67546 | 0.31687  |
| C | -7.64735  | 0.12036  | -0.85750 |
| C | -8.89481  | 0.66973  | -1.18485 |
| C | -9.98407  | 0.44215  | -0.38620 |
| C | -9.87676  | -0.34338 | 0.77419  |
| C | -8.67695  | -0.89173 | 1.12004  |
| H | -8.98413  | 1.27698  | -2.07865 |
| H | -10.94297 | 0.87221  | -0.64964 |
| H | -10.75118 | -0.50985 | 1.39074  |
| H | -8.58075  | -1.49958 | 2.01309  |

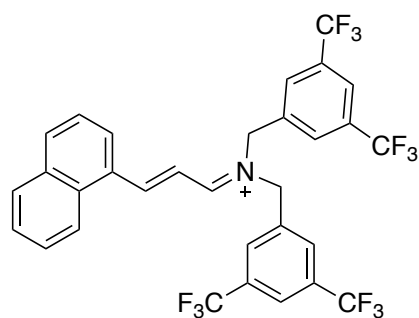

**Iminium 47**

M06/def2-TZVP Geometry

|   |          |          |          |
|---|----------|----------|----------|
| C | -5.19243 | 0.70788  | -1.61797 |
| C | -5.28225 | -0.36741 | -0.73555 |
| C | -4.13305 | -1.14498 | -0.44036 |

|   |          |          |          |
|---|----------|----------|----------|
| C | -2.87719 | -1.04587 | -0.97868 |
| C | -1.87705 | -1.90469 | -0.52161 |
| H | -2.14863 | -2.61686 | 0.25562  |
| N | -0.62671 | -1.97054 | -0.91000 |
| C | 0.29242  | -2.95963 | -0.32020 |
| C | -0.06485 | -1.10689 | -1.95621 |
| H | -4.24126 | 0.94073  | -2.08114 |
| H | -2.65262 | -0.31184 | -1.74296 |
| H | 0.56260  | -3.67379 | -1.10416 |
| H | 0.65846  | -1.70843 | -2.51220 |
| C | -6.28232 | 1.50908  | -1.91219 |
| H | -6.17622 | 2.34056  | -2.59672 |
| H | -4.25354 | -1.91801 | 0.31383  |
| H | -0.86492 | -0.85850 | -2.65654 |
| H | -0.26375 | -3.50276 | 0.44699  |
| C | 2.75316  | -2.51448 | -0.35175 |
| C | 1.52461  | -2.32302 | 0.24793  |
| C | 0.59611  | 2.08243  | -0.01577 |
| C | -0.04041 | 0.96049  | -0.51803 |
| C | 0.60444  | 0.13080  | -1.41999 |
| C | 1.89212  | 0.45005  | -1.82517 |
| C | 3.78491  | -1.03727 | 1.23126  |
| C | 3.88134  | -1.86788 | 0.13633  |
| C | 1.87966  | 2.39838  | -0.41720 |
| C | 2.52170  | 1.57799  | -1.32972 |
| H | 2.41660  | -0.18992 | -2.52747 |
| C | 3.94592  | 1.86910  | -1.72395 |
| C | -0.15670 | 2.93709  | 0.96679  |
| H | -1.04409 | 0.73356  | -0.17204 |
| H | 2.84380  | -3.16422 | -1.21806 |
| H | 4.66244  | -0.52822 | 1.61192  |
| C | 1.42977  | -1.49357 | 1.36081  |
| C | 2.55098  | -0.85552 | 1.84530  |
| C | 2.46662  | 0.07662  | 3.02428  |
| F | 1.29774  | -0.01390 | 3.64543  |
| H | 2.37961  | 3.27164  | -0.01778 |
| F | -0.61425 | 2.19713  | 1.97931  |
| F | 0.58772  | 3.90413  | 1.46949  |
| F | -1.22143 | 3.49384  | 0.38538  |
| F | 4.20862  | 3.16628  | -1.68943 |
| F | 4.79031  | 1.26571  | -0.88183 |
| F | 4.21606  | 1.42349  | -2.94385 |
| F | 2.61627  | 1.34356  | 2.62763  |
| F | 3.42251  | -0.17558 | 3.90695  |
| H | 0.47013  | -1.33515 | 1.84399  |
| C | 5.18650  | -2.08441 | -0.58107 |

|   |           |          |          |
|---|-----------|----------|----------|
| F | 6.18279   | -1.42010 | -0.02525 |
| F | 5.50558   | -3.37584 | -0.59943 |
| F | 5.08316   | -1.68956 | -1.85317 |
| C | -7.49384  | 1.24209  | -1.32250 |
| H | -8.35502  | 1.86442  | -1.54287 |
| C | -6.54830  | -0.66174 | -0.11478 |
| C | -7.65804  | 0.17231  | -0.42738 |
| C | -8.91610  | -0.07846 | 0.15886  |
| C | -9.08734  | -1.11711 | 1.02443  |
| C | -7.99878  | -1.94502 | 1.33110  |
| C | -6.76619  | -1.72558 | 0.77709  |
| H | -9.74364  | 0.57398  | -0.09665 |
| H | -10.05444 | -1.30682 | 1.47256  |
| H | -8.13434  | -2.77324 | 2.01623  |
| H | -5.96236  | -2.40057 | 1.04175  |

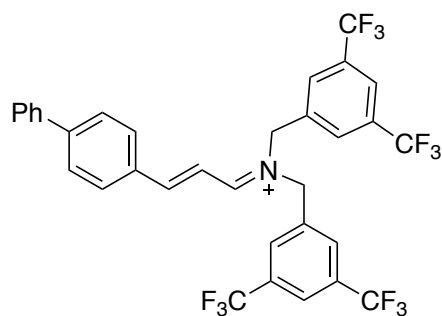

### Iminium 48

#### M06/def2-TZVP Geometry

|   |          |          |          |
|---|----------|----------|----------|
| C | 4.85101  | -0.73176 | -0.72664 |
| C | 4.56172  | -1.51163 | 0.40812  |
| C | 3.27184  | -2.01608 | 0.69874  |
| C | 2.11663  | -1.85120 | -0.01880 |
| C | 0.93979  | -2.43604 | 0.44748  |
| H | 0.99908  | -2.99860 | 1.37759  |
| N | -0.25343 | -2.39943 | -0.09481 |
| C | -1.38331 | -3.11034 | 0.53028  |
| C | -0.53786 | -1.70568 | -1.35684 |
| H | 4.06510  | -0.47761 | -1.42835 |
| H | 2.11370  | -1.26737 | -0.93170 |
| H | -1.02595 | -3.51619 | 1.47915  |
| H | 0.36717  | -1.72782 | -1.96747 |
| C | 6.11876  | -0.27236 | -0.95396 |
| H | 6.31123  | 0.34975  | -1.81922 |
| H | 3.19969  | -2.60682 | 1.61166  |
| H | -1.28519 | -2.29993 | -1.88843 |
| H | -1.64501 | -3.95425 | -0.11568 |
| C | -3.71508 | -2.40872 | -0.02917 |

|   |          |          |          |
|---|----------|----------|----------|
| C | -2.57642 | -2.22612 | 0.73057  |
| C | -0.89492 | 1.85687  | -0.11297 |
| C | -0.40054 | 0.57879  | -0.30989 |
| C | -1.04252 | -0.29965 | -1.16579 |
| C | -2.17821 | 0.12656  | -1.84068 |
| C | -4.74448 | -0.50651 | 1.00835  |
| C | -4.79530 | -1.54768 | 0.10627  |
| C | -2.02591 | 2.27979  | -0.78112 |
| C | -2.66076 | 1.40890  | -1.65136 |
| H | -2.70281 | -0.54977 | -2.50811 |
| C | -3.93915 | 1.84447  | -2.31692 |
| C | -0.17460 | 2.74596  | 0.86215  |
| H | 0.48217  | 0.27255  | 0.24310  |
| H | -3.76888 | -3.22300 | -0.74668 |
| H | -5.58485 | 0.16895  | 1.11231  |
| C | -2.53089 | -1.18506 | 1.65160  |
| C | -3.60662 | -0.33251 | 1.78704  |
| C | -3.54432 | 0.83239  | 2.73896  |
| F | -2.62796 | 0.65038  | 3.68115  |
| H | -2.42086 | 3.27479  | -0.61814 |
| F | -0.78053 | 3.90603  | 1.03306  |
| F | -0.07795 | 2.14950  | 2.05321  |
| F | 1.07173  | 2.98689  | 0.45036  |
| F | -4.97262 | 1.66457  | -1.48791 |
| F | -3.90803 | 3.12970  | -2.63716 |
| F | -4.18458 | 1.14965  | -3.41878 |
| F | -4.71007 | 1.03993  | 3.33144  |
| F | -3.22609 | 1.95296  | 2.08138  |
| H | -1.64285 | -1.03117 | 2.25810  |
| C | -5.98805 | -1.76528 | -0.78530 |
| F | -6.45148 | -3.00594 | -0.66302 |
| F | -6.97379 | -0.92732 | -0.52184 |
| F | -5.63776 | -1.60268 | -2.06498 |
| C | 7.17040  | -0.55703 | -0.06542 |
| C | 5.61379  | -1.79734 | 1.29529  |
| C | 6.88187  | -1.33146 | 1.06560  |
| H | 5.41249  | -2.40571 | 2.17089  |
| H | 7.67793  | -1.59077 | 1.75223  |
| C | 11.10016 | 0.89197  | -0.79044 |
| C | 10.26242 | 0.59665  | -1.85367 |
| C | 8.98337  | 0.13433  | -1.61939 |
| C | 8.52130  | -0.05805 | -0.31537 |
| C | 9.38106  | 0.23697  | 0.74511  |
| C | 10.65412 | 0.71454  | 0.50929  |
| H | 12.10174 | 1.26104  | -0.97493 |
| H | 10.61079 | 0.72346  | -2.87135 |

|   |          |          |          |
|---|----------|----------|----------|
| H | 8.34765  | -0.11656 | -2.46077 |
| H | 9.03626  | 0.12709  | 1.76685  |
| H | 11.30176 | 0.95486  | 1.34348  |

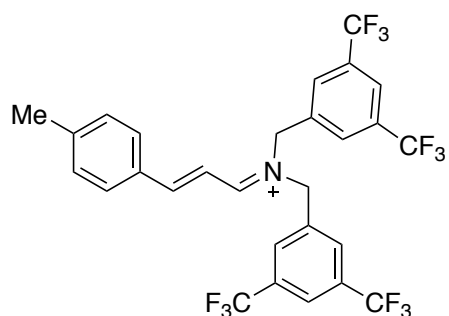

### Iminium 49

#### M06/def2-TZVP Geometry

|   |          |          |          |
|---|----------|----------|----------|
| C | -5.89318 | -0.39668 | -1.07598 |
| C | -5.71338 | -1.14215 | 0.10341  |
| C | -4.46770 | -1.70452 | 0.48571  |
| C | -3.27403 | -1.64147 | -0.17739 |
| C | -2.15459 | -2.26286 | 0.38189  |
| H | -2.29262 | -2.76992 | 1.33538  |
| N | -0.93765 | -2.31725 | -0.09612 |
| C | 0.12184  | -3.04558 | 0.62711  |
| C | -0.55051 | -1.70745 | -1.37546 |
| H | -5.05968 | -0.22706 | -1.74757 |
| H | -3.19229 | -1.10895 | -1.11753 |
| H | 0.38057  | -3.92912 | 0.03552  |
| H | 0.19096  | -2.36742 | -1.83225 |
| C | -7.12019 | 0.12448  | -1.38611 |
| H | -7.24994 | 0.69947  | -2.29666 |
| H | -4.47574 | -2.24998 | 1.42911  |
| H | -1.42205 | -1.71789 | -2.03311 |
| H | -0.30805 | -3.39019 | 1.57011  |
| C | 2.51519  | -2.47617 | 0.18905  |
| C | 1.33883  | -2.20242 | 0.85715  |
| C | 1.75275  | 1.26970  | -1.71446 |
| C | 1.21459  | 0.00375  | -1.85522 |
| C | 0.01804  | -0.32057 | -1.23038 |
| C | -0.62542 | 0.64091  | -0.47041 |
| C | 3.55778  | -0.55917 | 1.18483  |
| C | 3.62283  | -1.65378 | 0.35087  |
| C | 1.11468  | 2.22503  | -0.94004 |
| C | -0.07461 | 1.90246  | -0.31852 |
| H | -1.55539 | 0.41589  | 0.04262  |
| C | -0.80312 | 2.88789  | 0.55346  |
| C | 3.08900  | 1.60041  | -2.32502 |

|   |           |          |          |
|---|-----------|----------|----------|
| H | 1.74284   | -0.74035 | -2.44301 |
| H | 2.57976   | -3.33231 | -0.47699 |
| H | 4.41616   | 0.09157  | 1.30480  |
| C | 1.27893   | -1.10810 | 1.71451  |
| C | 2.37863   | -0.29282 | 1.87255  |
| C | 2.32850   | 0.91993  | 2.76319  |
| F | 3.36001   | 0.94783  | 3.59480  |
| H | 1.55266   | 3.20723  | -0.81272 |
| F | 4.05806   | 1.44930  | -1.41679 |
| F | 3.37324   | 0.80934  | -3.34989 |
| F | 3.13337   | 2.85559  | -2.74636 |
| F | -2.00277  | 3.17335  | 0.04382  |
| F | -1.01259  | 2.37043  | 1.76666  |
| F | -0.13963  | 4.01919  | 0.70050  |
| F | 1.21551   | 0.96058  | 3.48359  |
| F | 2.37772   | 2.03722  | 2.03187  |
| H | 0.36156   | -0.88421 | 2.25086  |
| C | 4.86287   | -1.97860 | -0.43766 |
| F | 5.86276   | -1.16120 | -0.16436 |
| F | 5.26365   | -3.22354 | -0.19657 |
| F | 4.60612   | -1.89625 | -1.74655 |
| C | -8.22360  | -0.06909 | -0.54443 |
| C | -6.82064  | -1.33368 | 0.94336  |
| C | -8.04987  | -0.80740 | 0.62346  |
| H | -6.69672  | -1.90601 | 1.85677  |
| H | -8.89524  | -0.96453 | 1.28335  |
| C | -9.54294  | 0.51154  | -0.90600 |
| H | -10.31152 | 0.26899  | -0.17377 |
| H | -9.47505  | 1.59963  | -0.98581 |
| H | -9.86995  | 0.14793  | -1.88342 |

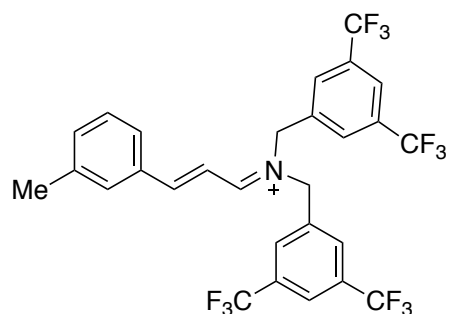

### Iminium 50

M06/def2-TZVP Geometry

|   |          |          |          |
|---|----------|----------|----------|
| C | -6.84691 | -1.42744 | 1.05397  |
| C | -5.77276 | -1.15781 | 0.19641  |
| C | -4.51300 | -1.75026 | 0.49537  |
| C | -3.34228 | -1.63412 | -0.19608 |

|   |          |          |          |
|---|----------|----------|----------|
| C | -2.20805 | -2.30539 | 0.27409  |
| N | -1.01058 | -2.32864 | -0.24930 |
| C | -0.66175 | -1.61830 | -1.48811 |
| C | 0.07089  | -3.11032 | 0.38052  |
| C | -8.08567 | -0.87634 | 0.80555  |
| C | -0.67491 | 0.66022  | -0.41436 |
| C | -0.06303 | -0.25742 | -1.25026 |
| C | 2.27774  | -0.45444 | 1.89281  |
| C | 1.19582  | -1.27455 | 1.65630  |
| C | 1.27327  | -2.27065 | 0.68819  |
| C | 2.44848  | -2.44258 | -0.01554 |
| C | 1.09911  | 2.23326  | -0.78900 |
| C | -0.09273 | 1.89501  | -0.18022 |
| C | 3.45475  | -0.61687 | 1.17080  |
| C | 3.53669  | -1.61290 | 0.22220  |
| C | 4.77537  | -1.81461 | -0.60924 |
| C | 2.20340  | 0.65821  | 2.90487  |
| C | 1.13427  | 0.08361  | -1.86367 |
| C | 1.70692  | 1.32110  | -1.63653 |
| C | 3.05081  | 1.65282  | -2.22969 |
| F | 3.13842  | 2.93465  | -2.55106 |
| F | 2.16200  | 1.84376  | 2.29008  |
| F | 1.12220  | 0.56370  | 3.66717  |
| F | 3.26680  | 0.66090  | 3.69548  |
| F | 5.21903  | -3.06368 | -0.49957 |
| F | 4.49934  | -1.60943 | -1.90058 |
| F | 5.75188  | -0.99618 | -0.26456 |
| F | 4.01747  | 1.39573  | -1.34212 |
| F | 3.30328  | 0.93431  | -3.31415 |
| C | -0.78336 | 2.82397  | 0.77981  |
| F | -0.91344 | 2.24145  | 1.97445  |
| F | -0.13050 | 3.95855  | 0.94553  |
| F | -2.01516 | 3.11242  | 0.35530  |
| C | -8.26064 | -0.05520 | -0.29329 |
| C | -5.97781 | -0.32038 | -0.91271 |
| C | -7.21046 | 0.23776  | -1.17073 |
| C | -7.44312 | 1.13117  | -2.34270 |
| H | -6.69403 | -2.07222 | 1.91247  |
| H | -4.49502 | -2.37078 | 1.39095  |
| H | -3.28729 | -1.02670 | -1.09156 |
| H | -2.31851 | -2.88683 | 1.18798  |
| H | -1.55760 | -1.56157 | -2.10928 |
| H | 0.05052  | -2.24867 | -2.02598 |
| H | 0.33745  | -3.91913 | -0.30636 |
| H | -0.34161 | -3.56297 | 1.28480  |
| H | -8.91770 | -1.08344 | 1.46653  |



|   |          |          |          |
|---|----------|----------|----------|
| H | -1.60428 | 0.42029  | 0.09345  |
| H | 0.27893  | -1.13101 | 2.22046  |
| H | 2.52599  | -3.22049 | -0.77040 |
| H | 1.56129  | 3.19359  | -0.59646 |
| H | 4.29846  | 0.03907  | 1.35063  |
| H | 1.63359  | -0.62577 | -2.51529 |
| H | -9.23674 | 0.37873  | -0.48685 |
| H | -5.15600 | -0.09912 | -1.58577 |
| H | -8.21799 | 0.72421  | -2.99596 |
| H | -7.78499 | 2.11688  | -2.01972 |
| H | -6.53834 | 1.26566  | -2.93495 |

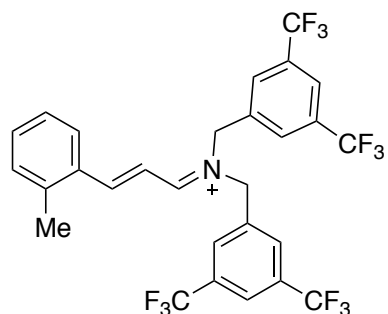

### Iminium 51

M06/def2-TZVP Geometry

|   |          |          |          |
|---|----------|----------|----------|
| C | -5.86506 | 0.10417  | -1.46282 |
| C | -5.83537 | -0.75173 | -0.34654 |
| C | -4.63347 | -1.40935 | 0.03822  |
| C | -3.40804 | -1.35099 | -0.56376 |
| C | -2.35021 | -2.08207 | -0.01368 |
| N | -1.11748 | -2.16520 | -0.44245 |
| C | -0.63548 | -1.46777 | -1.64323 |
| C | -0.13401 | -3.01275 | 0.25864  |
| C | -7.01773 | 0.74390  | -1.83799 |
| C | 1.25588  | 0.15755  | -1.86887 |
| C | 0.00434  | -0.13697 | -1.34772 |
| C | 2.14634  | -0.49823 | 1.89793  |
| C | 1.02849  | -1.24539 | 1.59758  |
| C | 1.09978  | -2.25425 | 0.64194  |
| C | 2.30310  | -2.51267 | 0.01697  |
| C | 1.23211  | 2.30053  | -0.77925 |
| C | 1.86133  | 1.36965  | -1.58868 |
| C | 3.35454  | -0.74992 | 1.25737  |
| C | 3.42861  | -1.75770 | 0.32120  |
| C | 4.69998  | -2.05022 | -0.42936 |
| C | 2.08775  | 0.62989  | 2.89285  |
| C | -0.62919 | 0.80176  | -0.55090 |

|   |          |          |          |
|---|----------|----------|----------|
| C | -0.01510 | 2.00859  | -0.26258 |
| C | -0.74476 | 2.97194  | 0.63313  |
| F | -0.03127 | 4.04799  | 0.90625  |
| F | 2.27568  | 1.80062  | 2.27770  |
| F | 0.91616  | 0.68536  | 3.51264  |
| F | 3.03580  | 0.51001  | 3.81132  |
| F | 5.05910  | -3.32123 | -0.27238 |
| F | 4.51421  | -1.85514 | -1.73838 |
| F | 5.70227  | -1.28511 | -0.03939 |
| F | -1.88897 | 3.36465  | 0.07039  |
| F | -1.06515 | 2.38317  | 1.78806  |
| C | 3.25575  | 1.63909  | -2.09020 |
| F | 4.15549  | 1.19474  | -1.20592 |
| F | 3.49024  | 1.02139  | -3.23996 |
| F | 3.47342  | 2.93315  | -2.26271 |
| C | -8.17664 | 0.53807  | -1.09860 |
| C | -7.01920 | -0.95722 | 0.40484  |
| C | -8.16975 | -0.29959 | 0.00226  |
| H | -4.96195 | 0.26766  | -2.03849 |
| H | -4.69598 | -2.03785 | 0.92392  |
| H | -3.24900 | -0.74634 | -1.44834 |
| H | -2.56043 | -2.66213 | 0.88336  |
| H | -1.47393 | -1.36624 | -2.33500 |
| H | 0.08791  | -2.12919 | -2.12609 |
| H | 0.12246  | -3.84237 | -0.40714 |
| H | -0.63380 | -3.43098 | 1.13507  |
| H | -7.02560 | 1.40144  | -2.69765 |
| H | 1.77358  | -0.56794 | -2.48851 |
| H | 0.08806  | -1.03066 | 2.09640  |
| H | 2.37501  | -3.30004 | -0.72853 |
| H | 1.71680  | 3.23989  | -0.54504 |
| H | 4.22754  | -0.15058 | 1.48834  |
| H | -1.60386 | 0.59875  | -0.11759 |
| H | -9.09477 | 1.03769  | -1.38451 |
| C | -7.06700 | -1.85020 | 1.60169  |
| H | -9.08321 | -0.44733 | 0.56668  |
| H | -8.06911 | -1.86307 | 2.02695  |
| H | -6.80655 | -2.88209 | 1.35360  |
| H | -6.38544 | -1.51723 | 2.38841  |

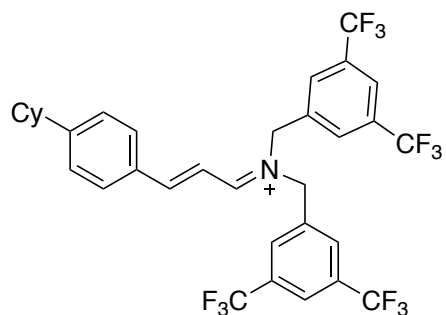

### Iminium 52

#### M06/def2-TZVP Geometry

|   |          |          |          |
|---|----------|----------|----------|
| C | -5.35350 | -2.05817 | 1.40295  |
| C | -4.34764 | -1.68265 | 0.49890  |
| C | -3.03937 | -2.19425 | 0.68962  |
| C | -1.92088 | -1.95645 | -0.06157 |
| C | -0.71632 | -2.55752 | 0.30758  |
| N | 0.45142  | -2.45520 | -0.27635 |
| C | 0.67658  | -1.65112 | -1.48475 |
| C | 1.62042  | -3.18440 | 0.24757  |
| C | -6.63639 | -1.58550 | 1.26576  |
| C | 0.51032  | 0.55612  | -0.28399 |
| C | 1.16456  | -0.25628 | -1.19501 |
| C | 3.73996  | -0.46057 | 1.76536  |
| C | 2.70012  | -1.33872 | 1.54965  |
| C | 2.77986  | -2.27664 | 0.52515  |
| C | 3.91568  | -2.33038 | -0.25762 |
| C | 2.10859  | 2.31005  | -0.64965 |
| C | 0.98413  | 1.82736  | -0.00885 |
| C | 4.87615  | -0.50492 | 0.96560  |
| C | 4.96039  | -1.44105 | -0.04162 |
| C | 6.15430  | -1.51762 | -0.95491 |
| C | 3.66421  | 0.58584  | 2.84497  |
| C | 2.29257  | 0.22938  | -1.83997 |
| C | 2.75688  | 1.50470  | -1.57099 |
| C | 4.02394  | 1.98857  | -2.22570 |
| F | 4.03837  | 3.30637  | -2.35165 |
| F | 4.77366  | 0.60998  | 3.56973  |
| F | 3.51424  | 1.79928  | 2.30717  |
| F | 2.64116  | 0.38032  | 3.66415  |
| F | 5.77997  | -1.30414 | -2.21982 |
| F | 7.08166  | -0.62996 | -0.64733 |
| F | 6.70445  | -2.72805 | -0.91119 |
| F | 5.08491  | 1.64410  | -1.48882 |
| F | 4.18656  | 1.45519  | -3.42924 |
| C | 0.23574  | 2.65251  | 1.00166  |
| F | -0.99805 | 2.92052  | 0.56931  |

|   |           |          |          |
|---|-----------|----------|----------|
| F | 0.10485   | 1.98253  | 2.14886  |
| F | 0.83590   | 3.79885  | 1.26268  |
| C | -6.97394  | -0.71996 | 0.22608  |
| C | -4.68982  | -0.81059 | -0.55072 |
| C | -5.97067  | -0.34446 | -0.67912 |
| H | -5.10566  | -2.72947 | 2.21864  |
| H | -2.92078  | -2.85543 | 1.54781  |
| H | -1.96508  | -1.30201 | -0.92401 |
| H | -0.72932  | -3.19500 | 1.19005  |
| H | -0.25028  | -1.63983 | -2.06174 |
| H | 1.41324   | -2.18454 | -2.09041 |
| H | 1.90018   | -3.94073 | -0.49218 |
| H | 1.29879   | -3.70614 | 1.15154  |
| H | -7.40199  | -1.88389 | 1.97309  |
| H | -0.36897  | 0.20323  | 0.24622  |
| H | 1.81349   | -1.28679 | 2.17479  |
| H | 3.99504   | -3.06194 | -1.05729 |
| H | 2.48278   | 3.30169  | -0.42887 |
| H | 5.68640   | 0.19481  | 1.13312  |
| H | 2.82358   | -0.39332 | -2.55292 |
| H | -6.21362  | 0.32747  | -1.49412 |
| H | -3.93858  | -0.49869 | -1.26711 |
| C | -10.45653 | -0.24434 | -1.32597 |
| C | -9.02156  | -0.72731 | -1.21277 |
| C | -8.37225  | -0.21536 | 0.07704  |
| C | -8.44962  | 1.31211  | 0.14045  |
| C | -9.88748  | 1.78605  | 0.02451  |
| C | -10.53671 | 1.26985  | -1.24728 |
| H | -11.04865 | -0.68259 | -0.51268 |
| H | -10.89707 | -0.60664 | -2.25795 |
| H | -8.44601  | -0.36334 | -2.07400 |
| H | -8.97350  | -1.82012 | -1.24370 |
| H | -8.95886  | -0.61015 | 0.91807  |
| H | -7.99418  | 1.66921  | 1.06900  |
| H | -7.86139  | 1.73917  | -0.68210 |
| H | -10.45514 | 1.42960  | 0.89332  |
| H | -9.92229  | 2.87752  | 0.06023  |
| H | -10.02484 | 1.70424  | -2.11592 |
| H | -11.57651 | 1.59954  | -1.30514 |

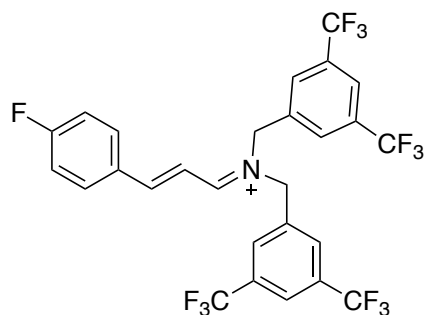

### Iminium 53

#### M06/def2-TZVP Geometry

|   |          |          |          |
|---|----------|----------|----------|
| C | 5.90277  | -0.35042 | -1.09718 |
| C | 5.73025  | -1.10095 | 0.07941  |
| C | 4.48419  | -1.66947 | 0.45965  |
| C | 3.29138  | -1.60709 | -0.20122 |
| C | 2.17478  | -2.24298 | 0.35304  |
| N | 0.96088  | -2.30450 | -0.12715 |
| C | 0.56739  | -1.68431 | -1.40037 |
| C | -0.09411 | -3.04897 | 0.58822  |
| C | 7.12492  | 0.17837  | -1.41894 |
| C | -1.22881 | 0.00090  | -1.84783 |
| C | -0.02066 | -0.30745 | -1.24016 |
| C | -3.58879 | -1.63553 | 0.34617  |
| C | -2.48513 | -2.45785 | 0.16193  |
| C | -1.30927 | -2.21052 | 0.84195  |
| C | -1.24643 | -1.14459 | 1.73357  |
| C | -1.14701 | 2.22461  | -0.93820 |
| C | -1.78329 | 1.26007  | -1.70139 |
| C | -3.52302 | -0.57294 | 1.22084  |
| C | -2.34501 | -0.33326 | 1.91899  |
| C | -2.29083 | 0.84841  | 2.85030  |
| C | -4.82989 | -1.92779 | -0.45410 |
| C | 0.62078  | 0.66339  | -0.48948 |
| C | 0.05642  | 1.91772  | -0.33331 |
| C | 0.79512  | 2.92161  | 0.50930  |
| F | 1.96223  | 3.23986  | -0.05414 |
| F | -5.26417 | -3.16210 | -0.21554 |
| F | -5.81004 | -1.08482 | -0.18838 |
| F | -4.56134 | -1.85358 | -1.76107 |
| F | -2.27189 | 1.98842  | 2.15381  |
| F | -3.35309 | 0.88685  | 3.64108  |
| F | -1.20718 | 0.82682  | 3.61524  |
| F | 0.10831  | 4.03408  | 0.68736  |
| F | 1.07425  | 2.40993  | 1.71055  |
| C | -3.13018 | 1.55389  | -2.30879 |
| F | -3.32301 | 0.86338  | -3.42461 |

|   |          |          |          |
|---|----------|----------|----------|
| F | -4.10341 | 1.21682  | -1.45664 |
| F | -3.27230 | 2.83989  | -2.58723 |
| C | 8.19485  | -0.04168 | -0.55913 |
| C | 6.83842  | -1.29748 | 0.92000  |
| C | 8.06962  | -0.77403 | 0.60974  |
| H | 5.06631  | -0.17984 | -1.76422 |
| H | 4.49545  | -2.22114 | 1.39922  |
| H | 3.20447  | -1.06843 | -1.13735 |
| H | 2.31679  | -2.75723 | 1.30212  |
| H | -0.16368 | -2.34949 | -1.86605 |
| H | 1.44004  | -1.67477 | -2.05633 |
| H | 0.34203  | -3.41233 | 1.52119  |
| H | -0.35415 | -3.91989 | -0.02099 |
| H | 7.28102  | 0.76009  | -2.31828 |
| H | -1.75079 | -0.74774 | -2.43518 |
| H | -2.55132 | -3.29162 | -0.53188 |
| H | -0.32942 | -0.94056 | 2.27859  |
| H | -1.59149 | 3.20333  | -0.80910 |
| H | -4.38069 | 0.07414  | 1.36228  |
| H | 1.56198  | 0.45177  | 0.00869  |
| H | 8.93355  | -0.91596 | 1.24588  |
| H | 6.71465  | -1.87409 | 1.83024  |
| F | 9.36258  | 0.46393  | -0.86896 |

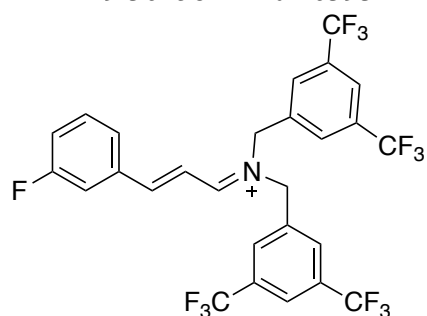

**Iminium 54**

M06/def2-TZVP Geometry

|   |          |          |          |
|---|----------|----------|----------|
| C | -6.86033 | -1.40154 | 1.03340  |
| C | -5.77253 | -1.15224 | 0.18715  |
| C | -4.51288 | -1.73911 | 0.51702  |
| C | -3.33908 | -1.63343 | -0.16403 |
| C | -2.20366 | -2.29258 | 0.33074  |
| N | -1.00407 | -2.31829 | -0.18061 |
| C | -0.64442 | -1.62530 | -1.42771 |
| C | 0.07326  | -3.09386 | 0.46806  |
| C | -8.09969 | -0.85851 | 0.76094  |
| C | -0.69524 | 0.66892  | -0.38941 |
| C | -0.06293 | -0.25447 | -1.20473 |
| C | 2.34010  | -0.43833 | 1.88930  |

|   |          |          |          |
|---|----------|----------|----------|
| C | 1.24255  | -1.24731 | 1.68830  |
| C | 1.28896  | -2.26159 | 0.73722  |
| C | 2.44807  | -2.46201 | 0.01436  |
| C | 1.04980  | 2.26750  | -0.79173 |
| C | -0.13759 | 1.91817  | -0.17824 |
| C | 3.50064  | -0.62962 | 1.14817  |
| C | 3.55090  | -1.64265 | 0.21558  |
| C | 4.77105  | -1.87929 | -0.63382 |
| C | 2.30225  | 0.69060  | 2.88499  |
| C | 1.12935  | 0.09634  | -1.82089 |
| C | 1.67657  | 1.35088  | -1.61903 |
| C | 3.00814  | 1.68850  | -2.23747 |
| F | 3.13324  | 2.98817  | -2.45228 |
| F | 3.38671  | 0.69742  | 3.64573  |
| F | 2.25215  | 1.86612  | 2.25226  |
| F | 1.24163  | 0.61578  | 3.67819  |
| F | 5.21626  | -3.12332 | -0.48265 |
| F | 4.46545  | -1.72765 | -1.92593 |
| F | 5.75476  | -1.04862 | -0.34464 |
| F | 4.00087  | 1.31794  | -1.42221 |
| F | 3.18470  | 1.05729  | -3.39033 |
| C | -0.86469 | 2.86765  | 0.73485  |
| F | -1.11287 | 2.28617  | 1.91113  |
| F | -0.18141 | 3.97359  | 0.96040  |
| F | -2.04574 | 3.20708  | 0.21611  |
| C | -8.27516 | -0.06006 | -0.35448 |
| C | -5.95308 | -0.34233 | -0.94289 |
| C | -7.19420 | 0.18534  | -1.19016 |
| H | -6.71947 | -2.02695 | 1.90753  |
| H | -4.50689 | -2.33967 | 1.42577  |
| H | -3.27637 | -1.04452 | -1.07140 |
| H | -2.32123 | -2.85842 | 1.25350  |
| H | -1.53231 | -1.58765 | -2.06165 |
| H | 0.08039  | -2.25853 | -1.94454 |
| H | 0.32179  | -3.92740 | -0.19557 |
| H | -0.33874 | -3.51091 | 1.38943  |
| H | -8.93678 | -1.05468 | 1.41846  |
| H | -1.62400 | 0.42372  | 0.11669  |
| H | 0.33940  | -1.08204 | 2.26848  |
| H | 2.50164  | -3.25564 | -0.72605 |
| H | 1.48998  | 3.24160  | -0.61976 |
| H | 4.35739  | 0.01590  | 1.30194  |
| H | 1.64582  | -0.61537 | -2.45713 |
| F | -7.36989 | 0.94833  | -2.25147 |
| H | -5.14672 | -0.11486 | -1.62882 |
| H | -9.23519 | 0.38079  | -0.59413 |

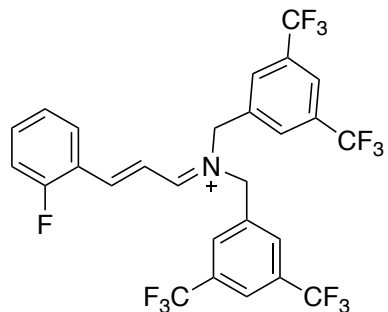

**Iminium 55**

M06/def2-TZVP Geometry

|   |          |          |          |
|---|----------|----------|----------|
| C | 6.94259  | -1.12745 | 1.02016  |
| C | 5.86209  | -0.97731 | 0.13102  |
| C | 4.60705  | -1.54592 | 0.49060  |
| C | 3.41904  | -1.53610 | -0.17850 |
| C | 2.31770  | -2.17910 | 0.40707  |
| N | 1.10826  | -2.28319 | -0.07111 |
| C | 0.70230  | -1.71254 | -1.36523 |
| C | 0.06505  | -3.01644 | 0.67360  |
| C | 8.18131  | -0.60396 | 0.74279  |
| C | 0.70120  | 0.66115  | -0.52074 |
| C | 0.08621  | -0.34363 | -1.24767 |
| C | -3.44150 | -1.62688 | 0.45643  |
| C | -2.33826 | -2.45120 | 0.27669  |
| C | -1.14997 | -2.17642 | 0.92337  |
| C | -1.07346 | -1.08145 | 1.77785  |
| C | -1.10007 | 2.16821  | -1.01776 |
| C | 0.10596  | 1.90516  | -0.39887 |
| C | -3.36113 | -0.53313 | 1.29062  |
| C | -2.17037 | -0.26679 | 1.95735  |
| C | -2.10057 | 0.94397  | 2.85006  |
| C | -4.70078 | -1.95730 | -0.29950 |
| C | -1.12623 | -0.08009 | -1.86825 |
| C | -1.70908 | 1.16956  | -1.75929 |
| C | -3.06303 | 1.41756  | -2.36991 |
| F | -3.26565 | 0.65875  | -3.43829 |
| F | -5.67413 | -1.10009 | -0.05505 |
| F | -4.46293 | -1.95238 | -1.61397 |
| F | -5.13010 | -3.17681 | 0.01386  |
| F | -2.10056 | 2.06197  | 2.11938  |
| F | -3.14635 | 1.00284  | 3.66170  |
| F | -1.00104 | 0.94915  | 3.59207  |
| F | -4.02330 | 1.12985  | -1.48519 |
| F | -3.21579 | 2.68345  | -2.72525 |



|   |          |          |          |
|---|----------|----------|----------|
| C | 0.79897  | 2.93312  | 0.45244  |
| F | 0.96279  | 2.46916  | 1.69449  |
| F | 2.01626  | 3.20005  | -0.02293 |
| F | 0.12820  | 4.06712  | 0.52395  |
| C | 8.37895  | 0.09202  | -0.44347 |
| C | 6.11194  | -0.26697 | -1.05424 |
| C | 7.34330  | 0.26287  | -1.34739 |
| H | 6.77592  | -1.67200 | 1.94321  |
| H | 4.61738  | -2.06027 | 1.45124  |
| H | 3.32090  | -1.03872 | -1.13259 |
| H | 2.47064  | -2.65440 | 1.37483  |
| H | -0.01619 | -2.40751 | -1.80620 |
| H | 1.57458  | -1.70659 | -2.02134 |
| H | 0.51475  | -3.35710 | 1.60874  |
| H | -0.19735 | -3.90135 | 0.08632  |
| H | 8.99692  | -0.73164 | 1.44215  |
| H | 1.64450  | 0.48586  | -0.01257 |
| H | -2.41522 | -3.30815 | -0.38706 |
| H | -0.14667 | -0.85709 | 2.29781  |
| H | -1.56967 | 3.13829  | -0.91394 |
| H | -4.21830 | 0.11586  | 1.42688  |
| H | -1.62959 | -0.85660 | -2.43534 |
| F | 5.12967  | -0.09780 | -1.92631 |
| H | 9.35297  | 0.50879  | -0.66967 |
| H | 7.47764  | 0.80211  | -2.27635 |

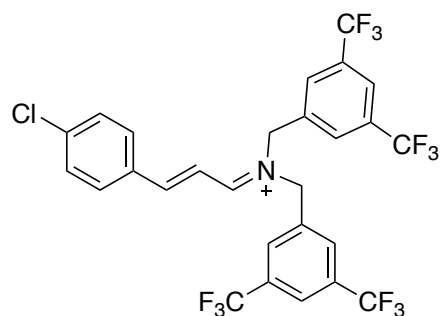

### Iminium 56

M06/def2-TZVP Geometry

|   |          |          |          |
|---|----------|----------|----------|
| C | 6.53569  | -1.46802 | 1.02541  |
| C | 5.43983  | -1.22800 | 0.18162  |
| C | 4.18044  | -1.78834 | 0.53021  |
| C | 2.99887  | -1.68908 | -0.14596 |
| C | 1.86150  | -2.31347 | 0.37850  |
| N | 0.65332  | -2.33623 | -0.11935 |
| C | 0.29331  | -1.68227 | -1.38558 |
| C | -0.42749 | -3.07387 | 0.56395  |

|   |          |          |          |
|---|----------|----------|----------|
| C | 7.77735  | -0.95238 | 0.74392  |
| C | -1.43916 | 0.07114  | -1.83101 |
| C | -0.25357 | -0.29089 | -1.20623 |
| C | -2.69483 | -0.35032 | 1.85557  |
| C | -1.59619 | -1.16685 | 1.69296  |
| C | -1.64143 | -2.22635 | 0.79230  |
| C | -2.80213 | -2.46446 | 0.08361  |
| C | -1.29997 | 2.26975  | -0.86724 |
| C | -1.95347 | 1.34387  | -1.66422 |
| C | -3.85643 | -0.57935 | 1.12671  |
| C | -3.90701 | -1.63965 | 0.24824  |
| C | -5.13029 | -1.92422 | -0.58120 |
| C | -2.65540 | 0.82466  | 2.79630  |
| C | 0.40381  | 0.64025  | -0.42080 |
| C | -0.12050 | 1.91003  | -0.24697 |
| C | 0.63094  | 2.86479  | 0.63988  |
| F | 0.00357  | 4.01572  | 0.79065  |
| F | -1.61358 | 0.76695  | 3.61551  |
| F | -2.56702 | 1.96772  | 2.11013  |
| F | -3.75507 | 0.88983  | 3.53194  |
| F | -6.12862 | -1.10691 | -0.30260 |
| F | -5.54784 | -3.17280 | -0.39389 |
| F | -4.84110 | -1.79852 | -1.87965 |
| F | 0.81565  | 2.33127  | 1.84972  |
| F | 1.84299  | 3.11549  | 0.14048  |
| C | -3.27751 | 1.71333  | -2.27993 |
| F | -3.55378 | 0.96656  | -3.33962 |
| F | -4.26145 | 1.53526  | -1.39308 |
| F | -3.30306 | 2.98448  | -2.65086 |
| C | 7.94200  | -0.17828 | -0.39811 |
| C | 5.63810  | -0.44118 | -0.96586 |
| C | 6.87221  | 0.07941  | -1.25480 |
| H | 6.39588  | -2.07239 | 1.91528  |
| H | 4.17010  | -2.36432 | 1.45505  |
| H | 2.93578  | -1.12705 | -1.07021 |
| H | 1.97886  | -2.85153 | 1.31767  |
| H | -0.45258 | -2.31643 | -1.87047 |
| H | 1.17337  | -1.68822 | -2.03180 |
| H | -0.01907 | -3.44802 | 1.50516  |
| H | -0.68122 | -3.93804 | -0.05757 |
| H | 8.62285  | -1.13738 | 1.39363  |
| H | -1.97575 | -0.64734 | -2.44252 |
| H | -0.69283 | -0.97305 | 2.26393  |
| H | -2.85643 | -3.29515 | -0.61484 |
| H | -1.71675 | 3.25892  | -0.72384 |
| H | -4.71458 | 0.07061  | 1.25099  |

|    |         |          |          |
|----|---------|----------|----------|
| H  | 1.32653 | 0.38623  | 0.09175  |
| H  | 4.81316 | -0.23290 | -1.63680 |
| Cl | 9.48002 | 0.47206  | -0.76178 |
| H  | 7.03107 | 0.68794  | -2.13574 |

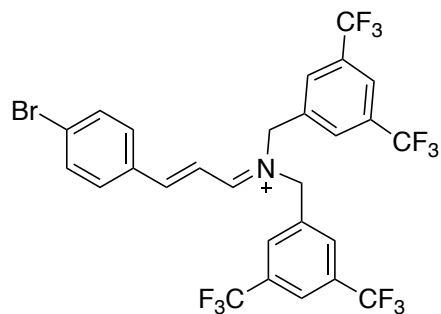

### Iminium 57

#### M06/def2-TZVP Geometry

|   |          |          |          |
|---|----------|----------|----------|
| C | 5.95448  | -1.59032 | 1.18977  |
| C | 4.88242  | -1.33435 | 0.32084  |
| C | 3.60677  | -1.87549 | 0.64047  |
| C | 2.44197  | -1.75409 | -0.06063 |
| C | 1.28394  | -2.36462 | 0.43418  |
| N | 0.08670  | -2.36465 | -0.09017 |
| C | -0.23552 | -1.69256 | -1.35709 |
| C | -1.01886 | -3.09441 | 0.56158  |
| C | 7.21052  | -1.09351 | 0.93592  |
| C | -1.92743 | 0.09435  | -1.82567 |
| C | -0.76476 | -0.29462 | -1.17454 |
| C | -3.28220 | -0.35449 | 1.82448  |
| C | -2.19050 | -1.18370 | 1.68069  |
| C | -2.22750 | -2.23416 | 0.76910  |
| C | -3.37312 | -2.45001 | 0.02939  |
| C | -1.78348 | 2.27560  | -0.82412 |
| C | -2.42854 | 1.37155  | -1.65220 |
| C | -4.42858 | -0.56191 | 1.06570  |
| C | -4.47088 | -1.61223 | 0.17484  |
| C | -5.67476 | -1.86842 | -0.69152 |
| C | -3.24920 | 0.81351  | 2.77405  |
| C | -0.11456 | 0.61551  | -0.35900 |
| C | -0.62496 | 1.89019  | -0.18022 |
| C | 0.11818  | 2.82266  | 0.73669  |
| F | -0.50033 | 3.97762  | 0.89342  |
| F | -2.22675 | 0.73748  | 3.61582  |
| F | -3.13078 | 1.95974  | 2.09725  |
| F | -4.36425 | 0.88836  | 3.48514  |
| F | -6.67080 | -1.04409 | -0.42558 |

|    |          |          |          |
|----|----------|----------|----------|
| F  | -6.11151 | -3.11495 | -0.53776 |
| F  | -5.34918 | -1.72338 | -1.97955 |
| F  | 1.34243  | 3.06846  | 0.26560  |
| F  | 0.27302  | 2.26818  | 1.94125  |
| C  | -3.73185 | 1.76805  | -2.29462 |
| F  | -3.73500 | 3.04683  | -2.63917 |
| F  | -3.98758 | 1.04662  | -3.37676 |
| F  | -4.74060 | 1.58189  | -1.43767 |
| C  | 7.41461  | -0.32422 | -0.20265 |
| C  | 5.11908  | -0.55260 | -0.82248 |
| C  | 6.36843  | -0.05219 | -1.08327 |
| H  | 5.78493  | -2.19124 | 2.07691  |
| H  | 3.56724  | -2.45467 | 1.56253  |
| H  | 2.40787  | -1.18572 | -0.98251 |
| H  | 1.37256  | -2.91192 | 1.37116  |
| H  | -0.98053 | -2.30987 | -1.86453 |
| H  | 0.65816  | -1.70578 | -1.98422 |
| H  | -0.63698 | -3.48132 | 1.50877  |
| H  | -1.26831 | -3.95025 | -0.07305 |
| H  | 8.03416  | -1.29343 | 1.60917  |
| H  | -2.45648 | -0.60589 | -2.46423 |
| H  | -1.29839 | -1.00621 | 2.27424  |
| H  | -3.42050 | -3.27266 | -0.67900 |
| H  | -2.19015 | 3.26823  | -0.67605 |
| H  | -5.28177 | 0.09686  | 1.17659  |
| H  | 0.79077  | 0.34062  | 0.17342  |
| H  | 4.31343  | -0.33291 | -1.51304 |
| Br | 9.11472  | 0.35947  | -0.56279 |
| H  | 6.55130  | 0.55124  | -1.96317 |

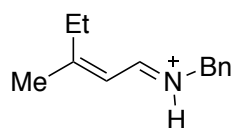

**Iminium 58**

M06/def2-TZVP Geometry

|   |          |          |          |
|---|----------|----------|----------|
| N | -0.03030 | 1.81924  | 0.15224  |
| C | 0.63549  | 0.72706  | -0.03455 |
| C | -1.50263 | 1.95568  | 0.24932  |
| C | -2.22057 | 0.65689  | 0.11540  |
| C | -2.61618 | 0.20180  | -1.13671 |
| C | -3.25688 | -1.01797 | -1.26397 |
| C | -3.50400 | -1.78937 | -0.14012 |
| C | -3.11367 | -1.34124 | 1.11138  |
| C | -2.47322 | -0.12149 | 1.23881  |

|   |          |          |          |
|---|----------|----------|----------|
| C | 2.05403  | 0.65207  | -0.11859 |
| C | 2.55061  | -0.58907 | -0.32523 |
| C | 2.85447  | 1.90475  | 0.01721  |
| C | 3.95628  | -1.00838 | -0.45347 |
| C | 4.27617  | -2.18263 | 0.46516  |
| H | 0.49432  | 2.68352  | 0.24345  |
| H | 0.04424  | -0.18139 | -0.13015 |
| H | -1.80049 | 2.66038  | -0.53152 |
| H | -1.70628 | 2.42819  | 1.21385  |
| H | -2.43402 | 0.81443  | -2.01473 |
| H | -3.57457 | -1.36220 | -2.24050 |
| H | -4.01359 | -2.74015 | -0.23879 |
| H | -3.31955 | -1.93811 | 1.99138  |
| H | -2.17915 | 0.23831  | 2.22042  |
| H | 1.82590  | -1.40014 | -0.40167 |
| H | 2.66394  | 2.39804  | 0.97518  |
| H | 3.92292  | 1.71375  | -0.03684 |
| H | 2.61661  | 2.61669  | -0.77900 |
| H | 4.64449  | -0.17916 | -0.28352 |
| H | 4.10451  | -1.32522 | -1.49485 |
| H | 5.30360  | -2.51156 | 0.31619  |
| H | 4.15957  | -1.90721 | 1.51413  |
| H | 3.62023  | -3.03160 | 0.26346  |

### Cartesian coordinates of reaction components for predicting gold catalyzed dearomatization

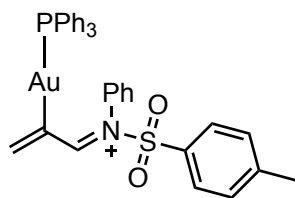

### Gold intermediate 1

M06/def2-TZVP Geometry

|   |          |          |          |
|---|----------|----------|----------|
| C | -0.78726 | -3.36224 | 1.99169  |
| C | -0.87123 | -2.35379 | 1.09910  |
| C | -2.15110 | -2.30669 | 0.47226  |
| N | -2.64408 | -1.34165 | -0.25559 |
| C | -2.04894 | -0.04627 | -0.42177 |
| S | -4.24057 | -1.58517 | -1.05450 |
| C | -1.45892 | 0.29780  | -1.62572 |
| C | -0.93089 | 1.56918  | -1.76987 |

|   |          |          |          |
|---|----------|----------|----------|
| C | -1.00820 | 2.47895  | -0.72829 |
| C | -1.60993 | 2.12370  | 0.46934  |
| C | -2.13472 | 0.85478  | 0.62892  |
| O | -3.98505 | -1.30323 | -2.41971 |
| O | -4.65383 | -2.86264 | -0.59186 |
| C | -5.16151 | -0.31168 | -0.31958 |
| C | -5.71594 | -0.52044 | 0.93748  |
| C | -6.40709 | 0.51023  | 1.53592  |
| C | -6.55600 | 1.74249  | 0.89939  |
| C | -5.98725 | 1.92055  | -0.35904 |
| C | -5.28756 | 0.90437  | -0.97658 |
| C | -7.34035 | 2.83402  | 1.54254  |
| P | 2.64308  | 0.16630  | 0.05459  |
| C | 2.45291  | 0.89794  | -1.59627 |
| C | 2.95417  | 1.55296  | 1.17609  |
| C | 2.13466  | 0.04327  | -2.64987 |
| C | 1.97010  | 0.54163  | -3.92787 |
| C | 2.10815  | 1.90247  | -4.16349 |
| C | 2.41717  | 2.75724  | -3.12003 |
| C | 2.59283  | 2.25820  | -1.83788 |
| C | 4.22445  | 2.10081  | 1.32439  |
| C | 4.41404  | 3.19752  | 2.14617  |
| C | 3.33993  | 3.75449  | 2.82117  |
| C | 2.07375  | 3.21145  | 2.68005  |
| C | 1.88156  | 2.11076  | 1.86416  |
| H | -1.62547 | -4.02653 | 2.20565  |
| H | 0.11591  | -3.55613 | 2.55980  |
| H | -1.40827 | -0.42555 | -2.43053 |
| H | -0.44887 | 1.84582  | -2.70040 |
| H | -0.59133 | 3.47201  | -0.85009 |
| H | -1.67117 | 2.83761  | 1.28218  |
| H | -2.61170 | 0.55448  | 1.55595  |
| H | -5.61458 | -1.48249 | 1.42639  |
| H | -6.85203 | 0.36117  | 2.51362  |
| H | -6.09918 | 2.87452  | -0.86219 |
| H | -4.84392 | 1.04206  | -1.95527 |
| H | -7.03392 | 3.81634  | 1.18290  |
| H | -8.40367 | 2.72090  | 1.31310  |
| H | -7.24284 | 2.81177  | 2.62850  |
| H | 2.02099  | -1.02164 | -2.46463 |
| H | 1.73436  | -0.13084 | -4.74410 |
| H | 1.97894  | 2.29426  | -5.16538 |
| H | 2.53196  | 3.81902  | -3.30324 |
| H | 2.83927  | 2.93421  | -1.02607 |
| H | 5.06922  | 1.66638  | 0.79989  |
| H | 5.40576  | 3.61761  | 2.26257  |

|    |          |          |          |
|----|----------|----------|----------|
| H  | 3.49295  | 4.61088  | 3.46697  |
| H  | 1.23582  | 3.63929  | 3.21781  |
| H  | 0.89309  | 1.67170  | 1.76225  |
| H  | 3.65377  | -1.92898 | 1.71774  |
| C  | 6.34906  | -1.24694 | -0.95465 |
| C  | 6.57035  | -2.19729 | 0.02750  |
| C  | 5.60439  | -2.43951 | 0.99087  |
| C  | 4.41566  | -1.73433 | 0.96851  |
| C  | 4.18860  | -0.77470 | -0.01365 |
| C  | 5.16275  | -0.53403 | -0.97683 |
| H  | 7.10337  | -1.05887 | -1.70914 |
| H  | 7.49877  | -2.75551 | 0.04048  |
| H  | 5.77565  | -3.18535 | 1.75757  |
| H  | 4.99531  | 0.21005  | -1.74840 |
| H  | -2.81819 | -3.16763 | 0.56047  |
| Au | 0.76401  | -1.12526 | 0.63083  |

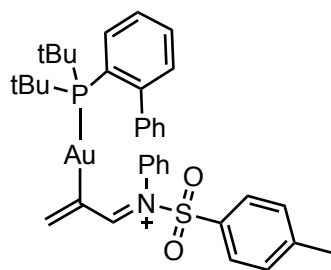

## Gold intermediate 2

M06/def2-TZVP Geometry

|   |          |          |          |
|---|----------|----------|----------|
| C | -0.77987 | 0.29683  | -2.04263 |
| C | -0.59405 | 1.10770  | -3.10725 |
| C | -2.10129 | -0.22738 | -2.01280 |
| N | -2.72818 | -0.77808 | -1.00676 |
| C | -2.29536 | -0.76248 | 0.35947  |
| S | -4.39220 | -1.41273 | -1.28162 |
| O | -4.36227 | -2.72526 | -0.74783 |
| O | -4.63259 | -1.14481 | -2.65537 |
| C | -5.30152 | -0.34595 | -0.25643 |
| C | -5.61891 | 0.92394  | -0.72273 |
| C | -6.29791 | 1.78570  | 0.11062  |
| C | -6.66702 | 1.39971  | 1.39918  |
| C | -6.33238 | 0.12144  | 1.83763  |
| C | -5.64897 | -0.75746 | 1.02217  |
| C | -7.43697 | 2.32840  | 2.27401  |
| C | -2.24546 | 0.45701  | 1.01908  |

|   |          |          |          |
|---|----------|----------|----------|
| C | -1.97816 | 0.47996  | 2.37505  |
| C | -1.77103 | -0.70680 | 3.06032  |
| C | -1.80247 | -1.91701 | 2.38670  |
| C | -2.06638 | -1.95367 | 1.02872  |
| P | 2.89288  | -0.80389 | 0.23803  |
| C | 4.01557  | 0.56869  | 0.70868  |
| C | 2.55043  | -1.76540 | 1.81682  |
| C | 3.83282  | -1.79304 | -1.07342 |
| C | 2.84090  | -2.68616 | -1.81906 |
| C | 4.37723  | -0.76065 | -2.05920 |
| C | 4.97102  | -2.67574 | -0.57915 |
| C | 1.72105  | -0.81938 | 2.68115  |
| C | 3.75759  | -2.20946 | 2.63317  |
| C | 1.71330  | -2.98983 | 1.46223  |
| C | 3.70958  | 1.92405  | 0.50221  |
| C | 4.69284  | 2.88162  | 0.75581  |
| C | 5.94442  | 2.54026  | 1.22374  |
| C | 6.24135  | 1.20999  | 1.45427  |
| C | 5.28782  | 0.24755  | 1.19329  |
| C | 2.40677  | 2.47417  | 0.04907  |
| C | 1.30764  | 2.51692  | 0.90215  |
| C | 0.15086  | 3.17990  | 0.52792  |
| C | 0.07073  | 3.80428  | -0.70510 |
| C | 1.15704  | 3.76410  | -1.56376 |
| C | 2.31694  | 3.10866  | -1.18716 |
| H | -1.39048 | 1.33733  | -3.81658 |
| H | 0.35667  | 1.59292  | -3.30028 |
| H | -2.69366 | -0.21336 | -2.93054 |
| H | -5.34706 | 1.22006  | -1.72958 |
| H | -6.56005 | 2.77745  | -0.24136 |
| H | -6.61729 | -0.18868 | 2.83686  |
| H | -5.38976 | -1.75263 | 1.36236  |
| H | -8.50759 | 2.24092  | 2.06857  |
| H | -7.29012 | 2.10190  | 3.33011  |
| H | -7.16072 | 3.36838  | 2.09668  |
| H | -2.43762 | 1.37204  | 0.46819  |
| H | -1.94589 | 1.42630  | 2.90173  |
| H | -1.57494 | -0.68737 | 4.12576  |
| H | -1.62715 | -2.84244 | 2.92183  |
| H | -2.11619 | -2.89279 | 0.49244  |
| H | 3.38135  | -3.22249 | -2.60468 |
| H | 2.04627  | -2.10799 | -2.29539 |
| H | 2.37648  | -3.43315 | -1.17397 |
| H | 3.59372  | -0.08038 | -2.40923 |
| H | 5.18414  | -0.16221 | -1.63264 |
| H | 4.77345  | -1.28470 | -2.93376 |



|    |          |          |          |
|----|----------|----------|----------|
| H  | 5.43531  | -3.15267 | -1.44775 |
| H  | 4.61923  | -3.47716 | 0.07321  |
| H  | 5.75814  | -2.12342 | -0.06723 |
| H  | 0.81493  | -0.48543 | 2.16897  |
| H  | 1.41851  | -1.34345 | 3.59383  |
| H  | 2.29677  | 0.06052  | 2.98101  |
| H  | 4.44027  | -2.85337 | 2.07858  |
| H  | 4.31771  | -1.36337 | 3.03180  |
| H  | 3.39506  | -2.78544 | 3.49032  |
| H  | 2.29954  | -3.74919 | 0.94068  |
| H  | 1.34429  | -3.44503 | 2.38674  |
| H  | 0.84725  | -2.73406 | 0.84453  |
| H  | 4.44554  | 3.92446  | 0.59028  |
| H  | 6.68142  | 3.31110  | 1.41390  |
| H  | 7.21454  | 0.91736  | 1.82908  |
| H  | 5.55248  | -0.78595 | 1.36370  |
| H  | 1.37491  | 2.05300  | 1.88085  |
| H  | -0.68542 | 3.22643  | 1.21671  |
| H  | -0.82876 | 4.33719  | -0.99034 |
| H  | 1.10913  | 4.26349  | -2.52480 |
| H  | 3.17791  | 3.09948  | -1.84822 |
| Au | 0.84920  | -0.16325 | -0.80079 |

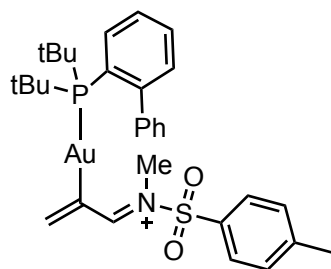

### Gold intermediate 3

M06/def2-TZVP Geometry

|   |          |          |          |
|---|----------|----------|----------|
| C | -0.86394 | 1.38979  | 2.05446  |
| C | -0.65097 | 1.91399  | 3.23725  |
| C | -1.71576 | 1.25565  | 0.98816  |
| N | -2.64544 | 0.29077  | 0.85305  |
| S | -3.05193 | -0.20612 | -0.74745 |
| O | -2.50049 | -1.51245 | -0.89804 |
| O | -2.63751 | 0.87643  | -1.57570 |
| C | -4.79073 | -0.30495 | -0.67506 |
| C | -5.53540 | 0.86877  | -0.65831 |
| C | -6.90860 | 0.78445  | -0.61791 |

|   |          |          |          |
|---|----------|----------|----------|
| C | -7.55567 | -0.45210 | -0.59943 |
| C | -6.78534 | -1.60867 | -0.62019 |
| C | -5.40495 | -1.54681 | -0.65773 |
| C | -9.04476 | -0.51552 | -0.57745 |
| P | 2.35876  | -1.07781 | 0.00870  |
| C | 3.58238  | -0.14986 | -0.98329 |
| C | 3.28102  | -1.84689 | 1.46365  |
| C | 1.55945  | -2.31263 | -1.15847 |
| C | 2.53330  | -3.19447 | -1.92989 |
| C | 0.59462  | -3.19124 | -0.37066 |
| C | 0.77140  | -1.47706 | -2.16555 |
| C | 4.09924  | -3.09481 | 1.15650  |
| C | 2.26300  | -2.20822 | 2.54583  |
| C | 4.19366  | -0.75248 | 2.01211  |
| C | 3.45614  | 1.21632  | -1.27833 |
| C | 4.46464  | 1.84133  | -2.01065 |
| C | 5.57591  | 1.15468  | -2.45458 |
| C | 5.69972  | -0.19359 | -2.17313 |
| C | 4.71295  | -0.82923 | -1.44845 |
| C | 2.32205  | 2.09469  | -0.88672 |
| C | 1.21110  | 2.22722  | -1.71361 |
| C | 0.22127  | 3.15223  | -1.42030 |
| C | 0.33065  | 3.95479  | -0.29612 |
| C | 1.43041  | 3.82605  | 0.53730  |
| C | 2.42315  | 2.90689  | 0.24034  |
| H | -1.40383 | 2.52498  | 3.72827  |
| H | 0.28066  | 1.76973  | 3.77153  |
| H | -1.61314 | 1.92943  | 0.13765  |
| H | -5.03806 | 1.83143  | -0.68793 |
| H | -7.50223 | 1.69232  | -0.60649 |
| H | -7.27670 | -2.57515 | -0.61068 |
| H | -4.80447 | -2.44794 | -0.68556 |
| H | -9.45720 | -0.17785 | -1.53172 |
| H | -9.45541 | 0.13867  | 0.19405  |
| H | -9.40448 | -1.52816 | -0.39818 |
| H | 1.94916  | -3.88040 | -2.55048 |
| H | 3.16705  | -3.80296 | -1.28444 |
| H | 3.16784  | -2.61600 | -2.60209 |
| H | -0.11331 | -2.60285 | 0.21894  |
| H | 0.00815  | -3.78590 | -1.07675 |
| H | 1.11574  | -3.88710 | 0.29018  |
| H | 0.26737  | -2.15358 | -2.86178 |
| H | 1.42499  | -0.82491 | -2.75075 |
| H | -0.00058 | -0.86796 | -1.68920 |
| H | 3.47540  | -3.92888 | 0.83079  |
| H | 4.87981  | -2.92971 | 0.41494  |

|    |          |          |          |
|----|----------|----------|----------|
| H  | 4.60024  | -3.40945 | 2.07684  |
| H  | 1.53050  | -2.94370 | 2.21008  |
| H  | 2.79913  | -2.64103 | 3.39539  |
| H  | 1.72222  | -1.33000 | 2.90806  |
| H  | 3.64688  | 0.17749  | 2.20005  |
| H  | 4.61063  | -1.08820 | 2.96587  |
| H  | 5.02496  | -0.52880 | 1.34209  |
| H  | 4.35662  | 2.89746  | -2.23209 |
| H  | 6.34154  | 1.67095  | -3.02097 |
| H  | 6.56203  | -0.75236 | -2.51555 |
| H  | 4.83122  | -1.88385 | -1.24097 |
| H  | 1.13379  | 1.61453  | -2.60564 |
| H  | -0.63096 | 3.25150  | -2.08288 |
| H  | -0.43381 | 4.69105  | -0.07588 |
| H  | 1.52456  | 4.45518  | 1.41457  |
| H  | 3.29952  | 2.82323  | 0.87562  |
| C  | -2.82842 | -0.69629 | 1.90490  |
| H  | -1.94735 | -1.34424 | 1.97719  |
| H  | -2.97831 | -0.18688 | 2.85505  |
| H  | -3.70570 | -1.30289 | 1.68678  |
| Au | 0.64896  | 0.26833  | 0.94425  |

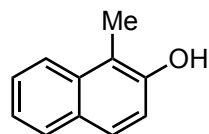

### Naphthol 29

M06-2X/def2-TZVP Geometry

|   |          |          |         |
|---|----------|----------|---------|
| C | 2.44977  | 0.48213  | 0.00000 |
| C | 2.50429  | 1.84703  | 0.00000 |
| C | 1.30744  | 2.59321  | 0.00000 |
| C | 0.09283  | 1.96462  | 0.00000 |
| C | 0.00000  | 0.54904  | 0.00000 |
| C | 1.20861  | -0.19642 | 0.00000 |
| C | 1.13970  | -1.60893 | 0.00000 |
| C | -0.06688 | -2.24006 | 0.00000 |
| C | -1.26638 | -1.49159 | 0.00000 |
| C | -1.25841 | -0.11842 | 0.00000 |
| C | -2.54383 | 0.65814  | 0.00000 |
| O | -2.46927 | -2.13880 | 0.00000 |
| H | -0.12089 | -3.32353 | 0.00000 |
| H | 3.36016  | -0.10591 | 0.00000 |
| H | 3.45846  | 2.35717  | 0.00000 |
| H | 1.35242  | 3.67481  | 0.00000 |
| H | -0.81314 | 2.55541  | 0.00000 |

|   |          |          |          |
|---|----------|----------|----------|
| H | 2.05846  | -2.18253 | 0.00000  |
| H | -3.39915 | -0.01106 | 0.00000  |
| H | -2.61120 | 1.30107  | 0.88016  |
| H | -2.61120 | 1.30107  | -0.88016 |
| H | -2.32256 | -3.08861 | 0.00000  |

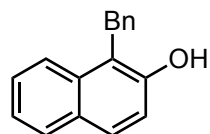

### Naphthol 30

M06-2X/def2-TZVP Geometry

|   |          |          |          |
|---|----------|----------|----------|
| C | -3.83738 | -0.34341 | 0.56548  |
| C | -3.94623 | -1.64907 | 0.17993  |
| C | -2.86056 | -2.27438 | -0.46524 |
| C | -1.70725 | -1.58496 | -0.72116 |
| C | -1.56262 | -0.22353 | -0.34545 |
| C | -2.65527 | 0.39414  | 0.32350  |
| C | -2.53610 | 1.74024  | 0.74564  |
| C | -1.38322 | 2.43369  | 0.54387  |
| C | -0.29869 | 1.81688  | -0.11595 |
| C | -0.37751 | 0.52961  | -0.59615 |
| C | 0.79659  | -0.01710 | -1.36955 |
| O | 0.81237  | 2.58839  | -0.26784 |
| H | -1.26174 | 3.45565  | 0.87707  |
| H | -4.65788 | 0.15198  | 1.07127  |
| H | -4.85412 | -2.20508 | 0.37241  |
| H | -2.93899 | -3.31329 | -0.75892 |
| H | -0.88930 | -2.10138 | -1.20397 |
| H | -3.37508 | 2.20595  | 1.24827  |
| H | 1.08186  | 0.71011  | -2.13553 |
| H | 0.50862  | -0.91446 | -1.91497 |
| H | 1.59004  | 2.03495  | -0.40925 |
| C | 4.25355  | -0.90758 | 1.04914  |
| C | 2.98157  | -1.24621 | 1.49467  |
| C | 1.86908  | -0.95081 | 0.72242  |
| C | 2.01066  | -0.32218 | -0.51349 |
| C | 3.28876  | 0.01609  | -0.94956 |
| C | 4.40499  | -0.27303 | -0.17405 |
| H | 5.12038  | -1.13258 | 1.65648  |
| H | 2.85617  | -1.73716 | 2.45114  |
| H | 0.87649  | -1.20109 | 1.07947  |
| H | 3.41135  | 0.50839  | -1.90838 |
| H | 5.39102  | 0.00042  | -0.52683 |

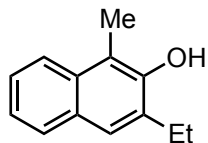

### Naphthol 31

M06-2X/def2-TZVP Geometry

|   |          |          |          |
|---|----------|----------|----------|
| C | 1.73932  | -1.97257 | 0.00000  |
| C | 3.07319  | -1.67432 | 0.00000  |
| C | 3.48753  | -0.32689 | -0.00000 |
| C | 2.56652  | 0.68499  | -0.00000 |
| C | 1.17629  | 0.40786  | -0.00000 |
| C | 0.76487  | -0.94790 | 0.00000  |
| C | -0.61841 | -1.24705 | 0.00000  |
| C | -1.56395 | -0.26331 | 0.00000  |
| C | -1.12712 | 1.09488  | -0.00000 |
| C | 0.19955  | 1.44410  | -0.00000 |
| C | 0.61518  | 2.88757  | -0.00000 |
| O | -2.05188 | 2.10155  | -0.00000 |
| C | -3.04725 | -0.54682 | 0.00000  |
| H | 1.40585  | -3.00389 | 0.00000  |
| H | 3.81099  | -2.46585 | 0.00000  |
| H | 4.54436  | -0.09246 | -0.00000 |
| H | 2.90315  | 1.71295  | -0.00000 |
| H | -0.91395 | -2.28874 | 0.00000  |
| H | 1.21965  | 3.11808  | 0.87989  |
| H | -0.25143 | 3.54163  | 0.00000  |
| H | -2.93981 | 1.73549  | 0.00000  |
| H | 1.21965  | 3.11809  | -0.87989 |
| H | -3.49962 | -0.06854 | 0.87747  |
| H | -3.49962 | -0.06854 | -0.87747 |
| C | -3.43032 | -2.01898 | 0.00000  |
| H | -4.51425 | -2.12680 | 0.00000  |
| H | -3.04117 | -2.52663 | -0.88303 |
| H | -3.04117 | -2.52663 | 0.88303  |

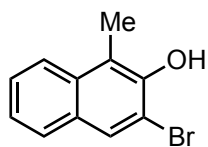

### Naphthol 32

M06-2X/def2-TZVP Geometry

|   |         |          |          |
|---|---------|----------|----------|
| C | 2.26323 | -1.97796 | -0.00000 |
|---|---------|----------|----------|

|    |          |          |          |
|----|----------|----------|----------|
| C  | 3.59488  | -1.67616 | 0.00000  |
| C  | 4.00693  | -0.32693 | 0.00000  |
| C  | 3.08656  | 0.68417  | 0.00000  |
| C  | 1.69537  | 0.40717  | 0.00000  |
| C  | 1.28864  | -0.95190 | -0.00000 |
| C  | -0.09082 | -1.25585 | -0.00000 |
| C  | -1.00195 | -0.24701 | -0.00000 |
| C  | -0.61177 | 1.11825  | 0.00000  |
| C  | 0.72423  | 1.44707  | 0.00000  |
| C  | 1.14417  | 2.88941  | 0.00000  |
| O  | -1.53044 | 2.11257  | 0.00000  |
| Br | -2.85848 | -0.65524 | -0.00000 |
| H  | 1.93044  | -3.00908 | -0.00000 |
| H  | 4.33421  | -2.46604 | 0.00000  |
| H  | 5.06339  | -0.09145 | 0.00000  |
| H  | 3.42299  | 1.71187  | 0.00000  |
| H  | -0.41519 | -2.28794 | -0.00000 |
| H  | 1.74866  | 3.11671  | 0.88041  |
| H  | 0.27925  | 3.54538  | -0.00000 |
| H  | -2.41886 | 1.73518  | 0.00000  |
| H  | 1.74866  | 3.11671  | -0.88041 |

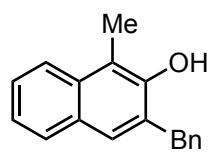

**Naphthol 33**

M06-2X/def2-TZVP Geometry

|   |          |          |          |
|---|----------|----------|----------|
| C | 3.21571  | -1.88923 | -0.09570 |
| C | 4.44984  | -1.52163 | 0.36214  |
| C | 4.70008  | -0.17377 | 0.69072  |
| C | 3.71841  | 0.76996  | 0.55694  |
| C | 2.42737  | 0.42083  | 0.08702  |
| C | 2.18242  | -0.93557 | -0.24415 |
| C | 0.90322  | -1.30069 | -0.72494 |
| C | -0.09277 | -0.38088 | -0.87683 |
| C | 0.16359  | 0.97524  | -0.51753 |
| C | 1.38752  | 1.38572  | -0.04984 |
| C | 1.62821  | 2.82387  | 0.31006  |
| O | -0.81566 | 1.91389  | -0.68061 |
| H | 3.00885  | -2.92115 | -0.35461 |
| H | 5.23487  | -2.25823 | 0.47172  |
| H | 5.67903  | 0.11565  | 1.05084  |
| H | 3.93014  | 1.79959  | 0.81166  |

|   |          |          |          |
|---|----------|----------|----------|
| H | 0.72155  | -2.33662 | -0.99048 |
| H | 1.95964  | 2.91411  | 1.34653  |
| H | 0.72228  | 3.40914  | 0.18604  |
| H | -1.68741 | 1.50517  | -0.62031 |
| H | 2.40714  | 3.25869  | -0.32024 |
| C | -1.44228 | -0.76513 | -1.42505 |
| H | -1.64566 | -0.19053 | -2.33342 |
| H | -1.40899 | -1.81562 | -1.72185 |
| C | -4.72073 | -0.20552 | 1.32133  |
| C | -3.50435 | -0.69815 | 1.77663  |
| C | -2.44686 | -0.87067 | 0.89643  |
| C | -2.59052 | -0.56054 | -0.45477 |
| C | -3.81227 | -0.06112 | -0.89980 |
| C | -4.87217 | 0.11469  | -0.01946 |
| H | -5.54344 | -0.06643 | 2.01029  |
| H | -3.37740 | -0.94402 | 2.82302  |
| H | -1.49440 | -1.24217 | 1.25624  |
| H | -3.93328 | 0.19174  | -1.94728 |
| H | -5.81415 | 0.50497  | -0.38249 |

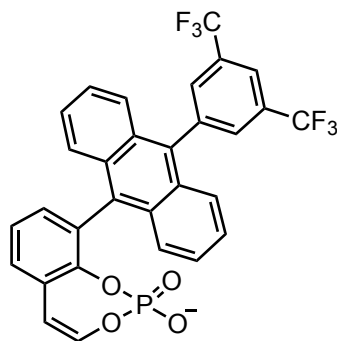

### 9-Anthryl-3,5-(CF<sub>3</sub>)<sub>2</sub>-C<sub>6</sub>H<sub>3</sub>

M06-2X/def2-TZVP Geometry

|   |          |          |          |
|---|----------|----------|----------|
| C | -5.81327 | -2.12872 | 0.48174  |
| C | -5.47735 | -0.96139 | -0.19425 |
| C | -4.13557 | -0.55695 | -0.19742 |
| C | -3.14354 | -1.31902 | 0.41101  |
| C | -3.51902 | -2.47897 | 1.09028  |
| C | -4.84751 | -2.86592 | 1.15478  |
| C | -6.39869 | -0.35237 | -1.16353 |
| C | -6.70744 | 0.94412  | -1.28435 |
| O | -3.84082 | 0.64226  | -0.76886 |
| O | -6.02537 | 2.00505  | -0.85394 |
| P | -4.54801 | 1.99479  | -0.08322 |
| O | -4.81168 | 1.68660  | 1.33647  |

|   |          |          |          |
|---|----------|----------|----------|
| O | -3.81892 | 3.15830  | -0.58857 |
| C | -1.70051 | -0.96398 | 0.29780  |
| C | -1.13930 | 0.04236  | 1.09581  |
| C | -0.89204 | -1.67995 | -0.59852 |
| C | -1.94623 | 0.79956  | 1.99738  |
| C | 0.26377  | 0.32550  | 1.01551  |
| C | 0.51109  | -1.39680 | -0.68801 |
| C | -1.43788 | -2.68451 | -1.45903 |
| C | -1.40205 | 1.77865  | 2.76484  |
| C | 0.79779  | 1.33783  | 1.87232  |
| C | 1.06849  | -0.40129 | 0.12557  |
| C | 1.29148  | -2.13137 | -1.63733 |
| C | -0.65820 | -3.36492 | -2.33815 |
| C | -0.00886 | 2.04076  | 2.71057  |
| C | 0.73083  | -3.08226 | -2.42817 |
| C | 2.52264  | -0.10478 | 0.03700  |
| C | 3.46496  | -1.00922 | 0.50987  |
| C | 4.82379  | -0.72981 | 0.41821  |
| C | 5.26867  | 0.45276  | -0.14170 |
| C | 4.32737  | 1.35929  | -0.61325 |
| C | 2.97215  | 1.09058  | -0.52780 |
| C | 4.81402  | 2.66096  | -1.18514 |
| C | 5.80182  | -1.75551 | 0.91479  |
| F | 5.17585  | 3.51883  | -0.21829 |
| F | 5.89581  | 2.48682  | -1.95953 |
| F | 3.88940  | 3.27183  | -1.92527 |
| F | 5.80367  | -2.85177 | 0.14144  |
| F | 7.05740  | -1.29414 | 0.93842  |
| F | 5.50783  | -2.16552 | 2.15495  |
| H | -6.84338 | -2.46560 | 0.46444  |
| H | -2.74947 | -3.07356 | 1.56830  |
| H | -5.12530 | -3.76020 | 1.69781  |
| H | -7.11325 | -1.03387 | -1.61127 |
| H | -7.54938 | 1.23892  | -1.90367 |
| H | -3.01414 | 0.62683  | 2.03016  |
| H | -2.49905 | -2.88461 | -1.40386 |
| H | -2.04205 | 2.36843  | 3.40733  |
| H | 1.85930  | 1.54458  | 1.85048  |
| H | 2.34633  | -1.91176 | -1.73348 |
| H | -1.09602 | -4.11461 | -2.98455 |
| H | 0.41558  | 2.81232  | 3.34121  |
| H | 1.34246  | -3.61962 | -3.14208 |
| H | 3.13109  | -1.94095 | 0.95124  |
| H | 6.32576  | 0.66788  | -0.21491 |
| H | 2.24777  | 1.80417  | -0.89990 |



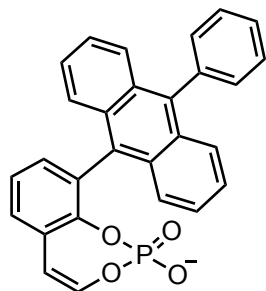

### 9-Anthryl-Ph

M06-2X/def2-TZVP Geometry

|   |          |          |          |
|---|----------|----------|----------|
| C | -4.28785 | -1.10927 | 1.93767  |
| C | -4.01169 | -0.78535 | 0.61364  |
| C | -2.67848 | -0.57205 | 0.23327  |
| C | -1.64527 | -0.63640 | 1.16907  |
| C | -1.95908 | -0.93495 | 2.49191  |
| C | -3.27154 | -1.16620 | 2.88005  |
| C | -5.03568 | -0.81693 | -0.44331 |
| C | -5.21681 | 0.25043  | -1.21904 |
| O | -2.41364 | -0.29168 | -1.06174 |
| O | -4.38485 | 1.30943  | -1.16466 |
| P | -2.79957 | 1.21039  | -1.67970 |
| O | -2.08486 | 2.23568  | -0.90231 |
| O | -2.77331 | 1.05572  | -3.13870 |
| C | -0.22540 | -0.42558 | 0.77085  |
| C | 0.50350  | -1.48500 | 0.21331  |
| C | 0.39799  | 0.80626  | 1.00526  |
| C | -0.10830 | -2.74696 | -0.06306 |
| C | 1.89176  | -1.31665 | -0.09904 |
| C | 1.79435  | 0.96748  | 0.72377  |
| C | -0.33391 | 1.92436  | 1.51294  |
| C | 0.59542  | -3.76679 | -0.61840 |
| C | 2.59118  | -2.41433 | -0.69391 |
| C | 2.52286  | -0.09474 | 0.17124  |
| C | 2.40783  | 2.22228  | 1.03525  |
| C | 0.28503  | 3.10229  | 1.77642  |
| C | 1.96808  | -3.59522 | -0.94285 |
| C | 1.68012  | 3.24660  | 1.55008  |
| C | 3.96708  | 0.08065  | -0.14574 |
| C | 4.95083  | -0.50111 | 0.65104  |
| C | 6.29637  | -0.33777 | 0.35111  |
| C | 6.67768  | 0.41169  | -0.75354 |
| C | 5.70531  | 0.99594  | -1.55431 |
| C | 4.36073  | 0.83154  | -1.25186 |
| H | -5.31396 | -1.30666 | 2.22618  |

|   |          |          |          |
|---|----------|----------|----------|
| H | -1.15621 | -0.98172 | 3.21824  |
| H | -3.49800 | -1.39854 | 3.91288  |
| H | -5.75562 | -1.62509 | -0.46359 |
| H | -6.01271 | 0.31976  | -1.95473 |
| H | -1.15794 | -2.86993 | 0.16759  |
| H | -1.40338 | 1.82802  | 1.62982  |
| H | 0.10840  | -4.71017 | -0.82986 |
| H | 3.63302  | -2.28671 | -0.95608 |
| H | 3.46710  | 2.34555  | 0.85387  |
| H | -0.29068 | 3.94612  | 2.13311  |
| H | 2.51592  | -4.40952 | -1.40076 |
| H | 2.16290  | 4.18998  | 1.77484  |
| H | 4.64900  | -1.08723 | 1.51086  |
| H | 7.04797  | -0.79542 | 0.98229  |
| H | 7.72661  | 0.53966  | -0.98925 |
| H | 5.99329  | 1.58041  | -2.41910 |
| H | 3.59838  | 1.28698  | -1.87240 |

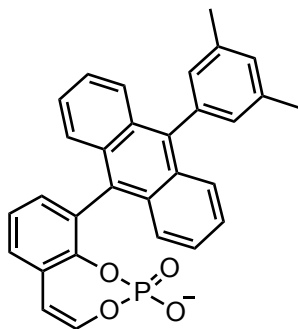

### 9-Anthryl-3,5-Me-C<sub>6</sub>H<sub>3</sub>

M06-2X/def2-TZVP Geometry

|   |         |          |          |
|---|---------|----------|----------|
| C | 4.67265 | 1.95617  | 1.08855  |
| C | 4.37828 | 1.02469  | 0.09955  |
| C | 3.05104 | 0.59578  | -0.03814 |
| C | 2.03013 | 1.11814  | 0.75008  |
| C | 2.36580 | 2.04218  | 1.74082  |
| C | 3.68003 | 2.43566  | 1.93322  |
| C | 5.32353 | 0.75394  | -0.99275 |
| C | 5.67803 | -0.44032 | -1.48154 |
| O | 2.80174 | -0.39576 | -0.93699 |
| O | 5.03317 | -1.60246 | -1.38690 |
| P | 3.55201 | -1.86455 | -0.66554 |
| O | 3.80193 | -1.97796 | 0.78503  |
| O | 2.86924 | -2.85416 | -1.50000 |
| C | 0.59852 | 0.77129  | 0.52094  |
| C | 0.06282 | -0.43724 | 0.98640  |

|   |          |          |          |
|---|----------|----------|----------|
| C | -0.22914 | 1.69421  | -0.13646 |
| C | 0.88548  | -1.40388 | 1.64034  |
| C | -1.33104 | -0.72196 | 0.80820  |
| C | -1.62302 | 1.40916  | -0.31945 |
| C | 0.28440  | 2.92314  | -0.66069 |
| C | 0.36395  | -2.57691 | 2.08268  |
| C | -1.84057 | -1.95707 | 1.31811  |
| C | -2.15712 | 0.20599  | 0.15844  |
| C | -2.42875 | 2.36794  | -1.01299 |
| C | -0.51756 | 3.80776  | -1.30769 |
| C | -1.02057 | -2.85143 | 1.92972  |
| C | -1.89911 | 3.52555  | -1.48567 |
| C | -3.60215 | -0.09676 | -0.03952 |
| C | -4.57191 | 0.50571  | 0.75912  |
| C | -5.92198 | 0.22879  | 0.58297  |
| C | -6.29532 | -0.66434 | -0.41862 |
| C | -5.35021 | -1.27919 | -1.23093 |
| C | -4.00370 | -0.98709 | -1.02834 |
| C | -6.95811 | 0.85513  | 1.47688  |
| C | -5.76117 | -2.23140 | -2.32111 |
| H | 5.69093  | 2.31594  | 1.18241  |
| H | 1.57426  | 2.44847  | 2.35945  |
| H | 3.92506  | 3.14250  | 2.71577  |
| H | 6.01457  | 1.55953  | -1.21448 |
| H | 6.53128  | -0.51337 | -2.14962 |
| H | 1.94792  | -1.22144 | 1.73710  |
| H | 1.33893  | 3.13105  | -0.54128 |
| H | 1.01677  | -3.31072 | 2.53663  |
| H | -2.89452 | -2.17306 | 1.20493  |
| H | -3.47748 | 2.14974  | -1.16553 |
| H | -0.10285 | 4.72672  | -1.70232 |
| H | -1.42427 | -3.78678 | 2.29821  |
| H | -2.52759 | 4.23349  | -2.01181 |
| H | -4.25822 | 1.20277  | 1.52866  |
| H | -7.34785 | -0.88447 | -0.56761 |
| H | -3.24799 | -1.45894 | -1.64725 |
| H | -6.62265 | 1.82322  | 1.84835  |
| H | -7.90153 | 0.99651  | 0.94877  |
| H | -7.15641 | 0.21983  | 2.34336  |
| H | -5.20031 | -3.16466 | -2.25495 |
| H | -6.82404 | -2.46445 | -2.26234 |
| H | -5.56208 | -1.80289 | -3.30540 |

## Cartesian coordinates of reaction components relevant to secondary amine catalysis

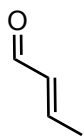

**Carbonyl 1**

M06-2X/def2-TZVP Geometry

|   |          |          |          |
|---|----------|----------|----------|
| C | 2.41641  | -0.16193 | -0.00000 |
| C | 1.03252  | 0.38970  | -0.00000 |
| C | -0.08691 | -0.32977 | -0.00000 |
| C | -1.39907 | 0.33121  | 0.00000  |
| O | -2.45235 | -0.24995 | 0.00000  |
| H | 2.96630  | 0.18771  | 0.87644  |
| H | 2.41221  | -1.25048 | -0.00000 |
| H | 2.96630  | 0.18771  | -0.87644 |
| H | 0.94032  | 1.47431  | 0.00000  |
| H | -0.08178 | -1.41435 | -0.00000 |
| H | -1.36230 | 1.43943  | -0.00000 |

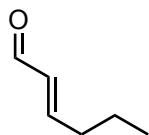

**Carbonyl 2**

M06-2X/def2-TZVP Geometry

|   |          |          |          |
|---|----------|----------|----------|
| C | -1.21212 | 0.86488  | 0.00001  |
| C | 0.27982  | 0.92963  | 0.00000  |
| C | 1.12099  | -0.10267 | -0.00000 |
| C | 2.57214  | 0.12765  | -0.00000 |
| O | 3.39918  | -0.74609 | -0.00001 |
| C | -1.81271 | -0.53309 | -0.00000 |
| H | -1.57688 | 1.42542  | 0.86887  |
| H | -1.57689 | 1.42543  | -0.86885 |
| H | 0.71059  | 1.92970  | 0.00001  |
| H | 0.79206  | -1.13504 | -0.00001 |
| H | 2.87449  | 1.19457  | 0.00000  |
| C | -3.33529 | -0.49628 | 0.00000  |
| H | -1.45560 | -1.08037 | -0.87608 |
| H | -1.45559 | -1.08038 | 0.87607  |
| H | -3.75626 | -1.50133 | -0.00000 |
| H | -3.71319 | 0.02500  | 0.88144  |
| H | -3.71319 | 0.02501  | -0.88143 |

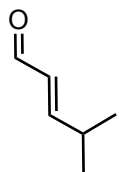

### Carbonyl 3

M06-2X/def2-TZVP Geometry

|   |          |          |          |
|---|----------|----------|----------|
| C | -1.53323 | -0.04218 | -0.40727 |
| C | -0.10080 | -0.47952 | -0.40165 |
| C | 0.95717  | 0.23318  | -0.02003 |
| C | 2.30105  | -0.36098 | -0.05682 |
| O | 3.30620  | 0.21244  | 0.27209  |
| C | -2.35974 | -1.00072 | 0.45782  |
| C | -1.73095 | 1.40210  | 0.03008  |
| H | -1.88634 | -0.14702 | -1.44029 |
| H | 0.07351  | -1.50314 | -0.73279 |
| H | 0.88824  | 1.25734  | 0.32686  |
| H | 2.33820  | -1.40844 | -0.41865 |
| H | -2.24004 | -2.03533 | 0.13396  |
| H | -2.04557 | -0.93271 | 1.50103  |
| H | -3.41857 | -0.74643 | 0.40250  |
| H | -2.78564 | 1.67193  | -0.02618 |
| H | -1.40482 | 1.53963  | 1.06331  |
| H | -1.16951 | 2.09333  | -0.59921 |

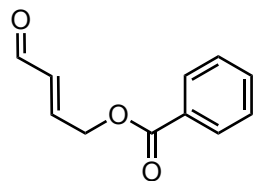

### Carbonyl 4

M06-2X/def2-TZVP Geometry

|   |          |          |          |
|---|----------|----------|----------|
| C | -1.58709 | -1.69284 | 0.00001  |
| C | -2.89474 | -0.98658 | 0.00001  |
| C | -3.07535 | 0.32964  | 0.00001  |
| C | -4.43719 | 0.88652  | 0.00001  |
| O | -4.68468 | 2.06273  | 0.00000  |
| O | -0.53134 | -0.74468 | 0.00000  |
| H | -1.50101 | -2.34173 | -0.87642 |
| H | -3.76369 | -1.64055 | 0.00002  |
| H | -2.24990 | 1.02961  | -0.00000 |
| H | -5.25118 | 0.13385  | 0.00002  |
| H | -1.50100 | -2.34173 | 0.87644  |
| C | 0.70923  | -1.26751 | 0.00001  |

|   |         |          |          |
|---|---------|----------|----------|
| O | 0.91205 | -2.45109 | 0.00002  |
| C | 3.82012 | 1.63789  | -0.00002 |
| C | 4.11850 | 0.28081  | -0.00001 |
| C | 3.09468 | -0.65157 | 0.00000  |
| C | 1.77006 | -0.22555 | -0.00000 |
| C | 1.47040 | 1.13330  | -0.00002 |
| C | 2.49838 | 2.06326  | -0.00003 |
| H | 4.62074 | 2.36632  | -0.00003 |
| H | 5.14912 | -0.04823 | -0.00000 |
| H | 3.29949 | -1.71388 | 0.00001  |
| H | 0.43890 | 1.45614  | -0.00002 |
| H | 2.26827 | 3.12035  | -0.00003 |

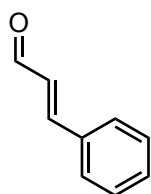

**Carbonyl 5**

M06-2X/def2-TZVP Geometry

|   |          |          |          |
|---|----------|----------|----------|
| C | -0.93462 | -0.58745 | 0.00006  |
| C | -1.97789 | 0.24678  | 0.00004  |
| C | -3.34379 | -0.28799 | 0.00012  |
| O | -4.33780 | 0.39081  | 0.00012  |
| H | -1.14957 | -1.65434 | 0.00013  |
| H | -1.88298 | 1.32573  | -0.00003 |
| H | -3.41186 | -1.39446 | 0.00018  |
| C | 3.22242  | 0.32711  | -0.00012 |
| C | 2.29272  | 1.36178  | -0.00008 |
| C | 0.93848  | 1.08212  | -0.00002 |
| C | 0.48674  | -0.24077 | 0.00000  |
| C | 1.43017  | -1.26904 | -0.00004 |
| C | 2.78821  | -0.98979 | -0.00010 |
| H | 4.28127  | 0.55031  | -0.00017 |
| H | 2.62877  | 2.39037  | -0.00009 |
| H | 0.22640  | 1.89677  | 0.00002  |
| H | 1.08988  | -2.29779 | -0.00002 |
| H | 3.50583  | -1.79958 | -0.00014 |

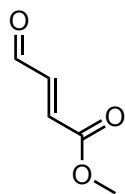

### Carbonyl 6

M06-2X/def2-TZVP Geometry

|   |          |          |          |
|---|----------|----------|----------|
| C | -0.32987 | -0.48556 | -0.00000 |
| C | -1.44372 | 0.23688  | -0.00004 |
| C | -2.76582 | -0.42325 | -0.00006 |
| O | -3.80563 | 0.17611  | -0.00009 |
| H | -0.35071 | -1.56941 | 0.00001  |
| H | -1.41373 | 1.32057  | -0.00005 |
| H | -2.74119 | -1.52999 | -0.00005 |
| C | 1.00581  | 0.16924  | 0.00002  |
| O | 1.19057  | 1.35454  | 0.00001  |
| O | 1.98378  | -0.74163 | 0.00006  |
| C | 3.30843  | -0.20935 | 0.00008  |
| H | 3.97350  | -1.06691 | 0.00010  |
| H | 3.46670  | 0.40291  | -0.88633 |
| H | 3.46666  | 0.40292  | 0.88649  |

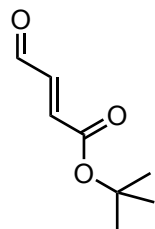

### Carbonyl 7

M06-2X/def2-TZVP Geometry

|   |          |          |          |
|---|----------|----------|----------|
| C | -1.42774 | 0.45949  | -0.00008 |
| C | -2.57768 | -0.20403 | -0.00026 |
| C | -3.86309 | 0.52332  | -0.00029 |
| O | -4.93378 | -0.01965 | -0.00045 |
| H | -1.39399 | 1.54301  | 0.00004  |
| H | -2.60285 | -1.28782 | -0.00037 |
| H | -3.78036 | 1.62741  | -0.00017 |
| C | -0.12348 | -0.26543 | -0.00003 |
| O | -0.02630 | -1.46283 | -0.00015 |
| O | 0.88534  | 0.60377  | 0.00014  |
| C | 2.27412  | 0.14859  | 0.00022  |
| C | 2.55939  | -0.65012 | -1.26396 |

|   |         |          |          |
|---|---------|----------|----------|
| H | 3.63001 | -0.85103 | -1.32046 |
| H | 2.02497 | -1.59676 | -1.26644 |
| H | 2.27374 | -0.07343 | -2.14483 |
| C | 2.55917 | -0.65038 | 1.26428  |
| H | 2.27336 | -0.07386 | 2.14522  |
| H | 2.02476 | -1.59702 | 1.26648  |
| H | 3.62978 | -0.85128 | 1.32093  |
| C | 3.05840 | 1.45089  | 0.00042  |
| H | 2.81817 | 2.03912  | 0.88622  |
| H | 4.12736 | 1.23810  | 0.00049  |
| H | 2.81832 | 2.03930  | -0.88531 |

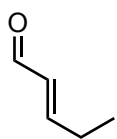

### Carbonyl 8

M06-2X/def2-TZVP Geometry

|   |          |          |          |
|---|----------|----------|----------|
| C | 0.42529  | 0.80619  | 0.00001  |
| C | -0.52128 | -0.13023 | -0.00000 |
| C | -1.93998 | 0.25253  | -0.00000 |
| O | -2.85459 | -0.52898 | -0.00002 |
| H | 0.10546  | 1.84694  | 0.00003  |
| H | -0.30351 | -1.19168 | -0.00002 |
| H | -2.12792 | 1.34539  | 0.00002  |
| C | 1.90204  | 0.58031  | 0.00001  |
| H | 2.32122  | 1.09909  | -0.86846 |
| H | 2.32121  | 1.09907  | 0.86851  |
| C | 2.33205  | -0.87790 | -0.00001 |
| H | 3.41834  | -0.95656 | -0.00001 |
| H | 1.95662  | -1.39789 | 0.88219  |
| H | 1.95662  | -1.39786 | -0.88222 |

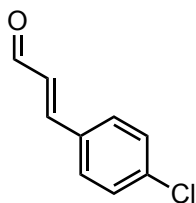

### Carbonyl 9

M06-2X/def2-TZVP Geometry

|   |          |         |          |
|---|----------|---------|----------|
| C | -1.89438 | 0.60050 | -0.00007 |
|---|----------|---------|----------|



|    |          |          |          |
|----|----------|----------|----------|
| C  | -2.88335 | -0.29723 | 0.00003  |
| C  | -4.28070 | 0.15112  | 0.00001  |
| O  | -5.22871 | -0.58994 | 0.00012  |
| H  | -2.17472 | 1.65193  | -0.00016 |
| H  | -2.72206 | -1.36835 | 0.00014  |
| H  | -4.41864 | 1.25093  | -0.00012 |
| C  | 2.29867  | -0.05394 | -0.00001 |
| C  | 1.44644  | -1.15159 | 0.00005  |
| C  | 0.08010  | -0.94888 | 0.00003  |
| C  | -0.45536 | 0.34246  | -0.00005 |
| C  | 0.42520  | 1.42472  | -0.00011 |
| C  | 1.79739  | 1.23724  | -0.00009 |
| H  | -0.57644 | -1.80872 | 0.00007  |
| H  | 0.02739  | 2.43235  | -0.00017 |
| H  | 2.47562  | 2.07897  | -0.00013 |
| Cl | 4.00910  | -0.30550 | 0.00003  |
| H  | 1.85981  | -2.15056 | 0.00011  |

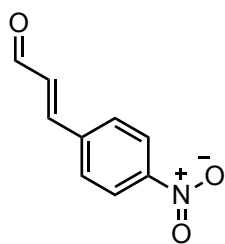

**Carbonyl 10**

M06-2X/def2-TZVP Geometry

|   |          |          |          |
|---|----------|----------|----------|
| C | 2.18706  | 0.61427  | -0.00001 |
| C | 3.16417  | -0.29422 | 0.00003  |
| C | 4.57063  | 0.13704  | 0.00007  |
| O | 5.50330  | -0.62101 | 0.00019  |
| H | 2.47519  | 1.66313  | -0.00003 |
| H | 2.99204  | -1.36363 | 0.00006  |
| H | 4.72556  | 1.23399  | -0.00000 |
| C | -1.98872 | -0.01199 | -0.00003 |
| C | -1.16079 | -1.12269 | -0.00000 |
| C | 0.20605  | -0.92728 | 0.00000  |
| C | 0.74374  | 0.36396  | -0.00002 |
| C | -0.12536 | 1.45687  | -0.00006 |
| C | -1.49805 | 1.27918  | -0.00006 |
| H | 0.85985  | -1.78838 | 0.00003  |
| H | 0.28275  | 2.45970  | -0.00008 |
| H | -2.18303 | 2.11406  | -0.00009 |
| H | -1.59438 | -2.11177 | 0.00002  |
| N | -3.45032 | -0.21635 | -0.00004 |
| O | -4.15031 | 0.76953  | -0.00004 |

O -3.85275 -1.35646 -0.00004

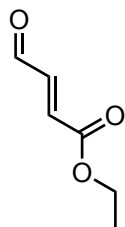

### Carbonyl 11

M06-2X/def2-TZVP Geometry

|   |          |          |          |
|---|----------|----------|----------|
| C | -0.80965 | -0.39341 | -0.00004 |
| C | -1.99521 | 0.20413  | -0.00005 |
| C | -3.23782 | -0.59507 | -0.00013 |
| O | -4.33681 | -0.11243 | -0.00014 |
| H | -0.71361 | -1.47326 | -0.00010 |
| H | -2.08234 | 1.28473  | 0.00000  |
| H | -3.09328 | -1.69268 | -0.00018 |
| C | 0.44845  | 0.40179  | 0.00003  |
| O | 0.50034  | 1.60073  | 0.00009  |
| O | 1.51824  | -0.39753 | 0.00003  |
| C | 2.79143  | 0.26704  | 0.00009  |
| H | 2.84664  | 0.90795  | 0.88091  |
| H | 2.84669  | 0.90802  | -0.88067 |
| C | 3.86020  | -0.79726 | 0.00008  |
| H | 4.84442  | -0.32951 | 0.00013  |
| H | 3.77645  | -1.42740 | 0.88486  |
| H | 3.77650  | -1.42733 | -0.88474 |

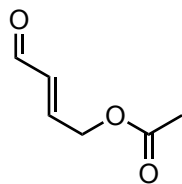

### Carbonyl 12

M06-2X/def2-TZVP Geometry

|   |          |          |          |
|---|----------|----------|----------|
| C | 0.74483  | -0.80684 | -0.13181 |
| C | 1.79577  | -0.14988 | 0.34719  |
| C | 2.96677  | 0.12582  | -0.50574 |
| O | 3.94778  | 0.70443  | -0.12456 |
| H | 0.73918  | -1.13736 | -1.16813 |
| H | 1.84380  | 0.20660  | 1.37133  |
| H | 2.88455  | -0.23966 | -1.54792 |
| O | -1.66070 | -0.96185 | -0.07393 |
| C | -2.22368 | 0.26953  | -0.18127 |

|   |          |          |          |
|---|----------|----------|----------|
| O | -3.15686 | 0.40373  | -0.91095 |
| C | -0.46666 | -1.17069 | 0.66643  |
| H | -0.45395 | -2.24201 | 0.87456  |
| H | -0.48218 | -0.64533 | 1.62243  |
| C | -1.65194 | 1.38371  | 0.65860  |
| H | -2.18040 | 2.29540  | 0.40100  |
| H | -1.79925 | 1.17054  | 1.71846  |
| H | -0.58410 | 1.51144  | 0.48336  |

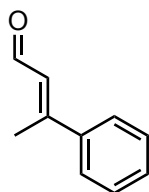

**Carbonyl 13**

M06-2X/def2-TZVP Geometry

|   |          |          |          |
|---|----------|----------|----------|
| C | 0.83795  | 0.51247  | 0.12717  |
| C | 1.77889  | -0.41044 | -0.13017 |
| C | 3.22926  | -0.20367 | -0.07967 |
| O | 4.01940  | -1.07643 | -0.34445 |
| H | 1.49352  | -1.41255 | -0.42795 |
| H | 3.59615  | 0.79437  | 0.21335  |
| C | -3.30710 | -0.54584 | -0.10817 |
| C | -2.36768 | -1.48754 | 0.29079  |
| C | -1.02807 | -1.14579 | 0.37009  |
| C | -0.59768 | 0.14522  | 0.05369  |
| C | -1.55615 | 1.08783  | -0.32372 |
| C | -2.89624 | 0.74303  | -0.41418 |
| H | -4.35372 | -0.81339 | -0.17087 |
| H | -2.68086 | -2.49050 | 0.54992  |
| H | -0.30889 | -1.87980 | 0.70909  |
| H | -1.25512 | 2.09818  | -0.56672 |
| H | -3.62098 | 1.48523  | -0.72254 |
| C | 1.13706  | 1.94693  | 0.46814  |
| H | 0.50417  | 2.27616  | 1.29276  |
| H | 2.17411  | 2.11036  | 0.74109  |
| H | 0.91487  | 2.59021  | -0.38628 |

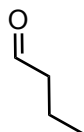

**Carbonyl 14**

M06-2X/def2-TZVP Geometry

|   |          |          |          |
|---|----------|----------|----------|
| C | 0.09436  | 0.74489  | 0.00001  |
| C | -0.82502 | -0.46422 | 0.00029  |
| C | 1.55824  | 0.40367  | 0.00052  |
| O | 1.99393  | -0.71386 | -0.00028 |
| C | -2.29500 | -0.06587 | -0.00020 |
| H | -0.08813 | 1.38741  | -0.87011 |
| H | -0.08850 | 1.38811  | 0.86953  |
| H | -0.59788 | -1.08223 | -0.87015 |
| H | -0.59827 | -1.08152 | 0.87134  |
| H | 2.24914  | 1.27056  | -0.00109 |
| H | -2.94242 | -0.94253 | 0.00002  |
| H | -2.54061 | 0.53051  | 0.88068  |
| H | -2.54022 | 0.52979  | -0.88167 |

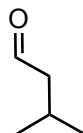

**Carbonyl 15**

M06-2X/def2-TZVP Geometry

|   |          |          |          |
|---|----------|----------|----------|
| C | -0.30105 | -0.84502 | 0.40766  |
| C | 0.72625  | 0.04054  | -0.28689 |
| C | -1.73518 | -0.44180 | 0.19881  |
| O | -2.10113 | 0.43139  | -0.53810 |
| C | 2.09733  | -0.62723 | -0.27017 |
| H | -0.11916 | -0.88750 | 1.48893  |
| H | -0.22747 | -1.88511 | 0.06459  |
| H | 0.40454  | 0.16675  | -1.32410 |
| C | 0.78723  | 1.41890  | 0.36530  |
| H | -2.47834 | -1.03184 | 0.77206  |
| H | 2.07733  | -1.59728 | -0.76997 |
| H | 2.43503  | -0.78517 | 0.75763  |
| H | 2.83943  | -0.00413 | -0.77109 |
| H | 1.50826  | 2.05675  | -0.14774 |
| H | -0.18271 | 1.91371  | 0.33795  |
| H | 1.10462  | 1.33041  | 1.40825  |

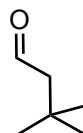

**Carbonyl 16**

M06-2X/def2-TZVP Geometry

|   |          |         |          |
|---|----------|---------|----------|
| C | -0.40515 | 1.04688 | -0.00002 |
|---|----------|---------|----------|

|   |          |          |          |
|---|----------|----------|----------|
| C | 0.69955  | -0.01434 | -0.00003 |
| C | -1.83950 | 0.59219  | 0.00006  |
| O | -2.22845 | -0.54284 | 0.00011  |
| C | 0.60721  | -0.88593 | 1.25455  |
| H | -0.29862 | 1.70921  | -0.86949 |
| H | -0.29856 | 1.70926  | 0.86942  |
| C | 0.60718  | -0.88593 | -1.25460 |
| C | 2.04338  | 0.71842  | -0.00005 |
| H | -2.57320 | 1.42476  | 0.00005  |
| H | -0.32269 | -1.45175 | 1.27533  |
| H | 0.66287  | -0.27277 | 2.15764  |
| H | 1.44033  | -1.59144 | 1.27962  |
| H | 2.86675  | 0.00160  | -0.00005 |
| H | 2.14716  | 1.35106  | -0.88474 |
| H | 2.14718  | 1.35107  | 0.88464  |
| H | 1.44031  | -1.59144 | -1.27970 |
| H | -0.32272 | -1.45177 | -1.27536 |
| H | 0.66281  | -0.27278 | -2.15770 |

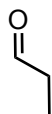

**Carbonyl 17**

M06-2X/def2-TZVP Geometry

|   |          |          |          |
|---|----------|----------|----------|
| C | 0.54453  | 0.73360  | 0.00006  |
| C | 1.42491  | -0.50264 | 0.00002  |
| C | -0.92592 | 0.42155  | -0.00012 |
| O | -1.38259 | -0.68757 | -0.00001 |
| H | 0.73548  | 1.37233  | -0.86933 |
| H | 0.73530  | 1.37213  | 0.86963  |
| H | -1.59970 | 1.30134  | 0.00003  |
| H | 1.22507  | -1.11632 | -0.87731 |
| H | 1.22489  | -1.11650 | 0.87718  |
| H | 2.47861  | -0.22748 | 0.00016  |

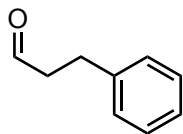

**Carbonyl 18**

M06-2X/def2-TZVP Geometry

|   |         |          |          |
|---|---------|----------|----------|
| C | 1.81424 | -0.00003 | 0.73104  |
| C | 1.03276 | 0.00004  | -0.57842 |
| C | 3.30495 | -0.00003 | 0.54121  |

|   |          |          |          |
|---|----------|----------|----------|
| O | 3.85039  | 0.00002  | -0.52705 |
| H | 1.55715  | -0.86996 | 1.34624  |
| H | 1.55716  | 0.86985  | 1.34632  |
| H | 3.90321  | -0.00008 | 1.47411  |
| H | 1.32192  | -0.87391 | -1.16399 |
| H | 1.32192  | 0.87406  | -1.16390 |
| C | -3.19486 | -0.00002 | 0.22092  |
| C | -2.51032 | 1.19949  | 0.08237  |
| C | -1.14990 | 1.19657  | -0.19123 |
| C | -0.45192 | 0.00002  | -0.33136 |
| C | -1.14987 | -1.19655 | -0.19129 |
| C | -2.51029 | -1.19951 | 0.08231  |
| H | -4.25650 | -0.00004 | 0.43035  |
| H | -3.03769 | 2.13952  | 0.18248  |
| H | -0.62065 | 2.13621  | -0.30540 |
| H | -0.62060 | -2.13617 | -0.30551 |
| H | -3.03764 | -2.13956 | 0.18238  |

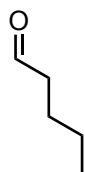

**Carbonyl 19**

M06-2X/def2-TZVP Geometry

|   |          |          |          |
|---|----------|----------|----------|
| C | -1.02609 | 1.03921  | 0.07811  |
| C | 0.35036  | 0.70925  | -0.47754 |
| C | -1.94969 | -0.14501 | 0.17816  |
| O | -1.69652 | -1.24460 | -0.22914 |
| C | 1.21906  | -0.06670 | 0.50737  |
| H | -1.54927 | 1.77794  | -0.54044 |
| H | -0.96256 | 1.49262  | 1.07405  |
| H | 0.23163  | 0.12330  | -1.39227 |
| H | 0.85818  | 1.63641  | -0.75516 |
| H | -2.93001 | 0.05945  | 0.65346  |
| H | 0.70296  | -0.98543 | 0.79310  |
| C | 2.58511  | -0.40402 | -0.07481 |
| H | 1.34268  | 0.52605  | 1.41913  |
| H | 2.48139  | -1.02364 | -0.96725 |
| H | 3.12329  | 0.50239  | -0.35984 |
| H | 3.20141  | -0.94861 | 0.64064  |

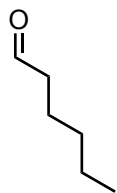

### Carbonyl 20

M06-2X/def2-TZVP Geometry

|   |          |          |          |
|---|----------|----------|----------|
| C | 1.71210  | -0.91578 | 0.29957  |
| C | 0.37744  | -0.94595 | -0.42881 |
| C | 2.41032  | 0.41659  | 0.25050  |
| O | 2.03346  | 1.36197  | -0.38460 |
| H | 1.60423  | -1.19301 | 1.35451  |
| H | 2.42023  | -1.64187 | -0.11701 |
| H | 3.34455  | 0.48234  | 0.84348  |
| H | 0.50972  | -0.51907 | -1.42592 |
| H | 0.06546  | -1.98454 | -0.56383 |
| C | -0.71756 | -0.18026 | 0.30585  |
| H | -0.85761 | -0.61539 | 1.30196  |
| C | -2.04657 | -0.19401 | -0.43883 |
| H | -0.39777 | 0.85445  | 0.45475  |
| C | -3.14141 | 0.55943  | 0.30515  |
| H | -2.35766 | -1.23007 | -0.60384 |
| H | -1.90363 | 0.24643  | -1.42957 |
| H | -2.85957 | 1.60316  | 0.45554  |
| H | -4.08396 | 0.54248  | -0.24252 |
| H | -3.31757 | 0.11917  | 1.28863  |

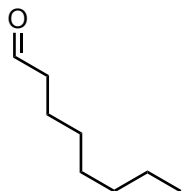

### Carbonyl 21

M06-2X/def2-TZVP Geometry

|   |         |          |          |
|---|---------|----------|----------|
| C | 2.98264 | -0.74533 | 0.36427  |
| C | 1.66068 | -0.98889 | -0.34694 |
| C | 3.51043 | 0.65668  | 0.21955  |
| O | 3.01820 | 1.50344  | -0.47317 |
| H | 2.91179 | -0.96217 | 1.43634  |
| H | 3.77457 | -1.40477 | -0.01015 |
| H | 4.43043 | 0.87703  | 0.79736  |
| H | 1.73683 | -0.61586 | -1.37111 |
| H | 1.47997 | -2.06476 | -0.41047 |

|   |          |          |          |
|---|----------|----------|----------|
| C | 0.48051  | -0.31758 | 0.34744  |
| H | 0.39778  | -0.70108 | 1.37062  |
| C | -0.83708 | -0.54366 | -0.38253 |
| H | 0.67106  | 0.75584  | 0.42591  |
| C | -2.02541 | 0.11024  | 0.31064  |
| H | -1.02071 | -1.61946 | -0.47900 |
| H | -0.75361 | -0.15372 | -1.40227 |
| H | -2.11039 | -0.27903 | 1.33119  |
| H | -1.84034 | 1.18529  | 0.40837  |
| C | -3.34388 | -0.10832 | -0.42135 |
| C | -4.52265 | 0.55119  | 0.28272  |
| H | -3.25724 | 0.28180  | -1.43963 |
| H | -3.52651 | -1.18256 | -0.51934 |
| H | -5.45668 | 0.38544  | -0.25478 |
| H | -4.64284 | 0.15542  | 1.29313  |
| H | -4.37108 | 1.62909  | 0.36641  |

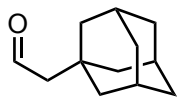

**Carbonyl 22**

M06-2X/def2-TZVP Geometry

|   |          |          |          |
|---|----------|----------|----------|
| C | 2.03325  | 1.08440  | 0.00001  |
| C | 3.20816  | 0.14380  | -0.00000 |
| O | 3.16553  | -1.05537 | -0.00000 |
| H | 2.17351  | 1.74133  | -0.86947 |
| H | 2.17351  | 1.74127  | 0.86953  |
| H | 4.19172  | 0.65812  | -0.00006 |
| C | -1.07042 | -0.88062 | -1.25341 |
| C | 0.36927  | -0.35354 | -1.25407 |
| C | 0.62403  | 0.50119  | -0.00001 |
| C | -0.37930 | 1.66899  | 0.00034  |
| C | -1.82050 | 1.15077  | 0.00036  |
| C | -2.05135 | 0.29628  | -1.25100 |
| H | 0.54255  | 0.25632  | -2.14824 |
| H | 1.07275  | -1.18724 | -1.28019 |
| H | -0.20758 | 2.29624  | 0.88221  |
| H | -0.20774 | 2.29664  | -0.88127 |
| C | -2.05112 | 0.29571  | 1.25137  |
| H | -2.50996 | 1.99856  | 0.00062  |
| H | -1.91024 | 0.90342  | -2.15025 |
| H | -3.08096 | -0.07301 | -1.26559 |
| H | -3.08073 | -0.07358 | 1.26598  |
| C | -1.07019 | -0.88119 | 1.25306  |
| H | -1.90984 | 0.90243  | 2.15088  |
| H | -1.22950 | -1.49120 | 2.14534  |



|   |          |          |          |
|---|----------|----------|----------|
| C | -1.29567 | -1.73529 | -0.00035 |
| C | 0.36949  | -0.35412 | 1.25370  |
| H | -1.22990 | -1.49022 | -2.14594 |
| H | -2.31353 | -2.13634 | -0.00035 |
| H | -0.60810 | -2.58565 | -0.00061 |
| H | 1.07299  | -1.18782 | 1.27931  |
| H | 0.54294  | 0.25534  | 2.14812  |

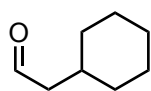

**Carbonyl 23**

M06-2X/def2-TZVP Geometry

|   |          |          |          |
|---|----------|----------|----------|
| C | 1.59121  | 0.88143  | 0.45456  |
| C | 2.81196  | 0.08671  | 0.07841  |
| O | 2.82281  | -0.82669 | -0.69945 |
| H | 1.78712  | 1.90969  | 0.12297  |
| H | 1.55303  | 0.93762  | 1.54948  |
| H | 3.75389  | 0.41331  | 0.56346  |
| C | -2.15711 | 0.88599  | -0.52808 |
| C | -0.83050 | 1.39828  | 0.02670  |
| C | 0.28182  | 0.35845  | -0.11604 |
| C | -0.13316 | -0.95616 | 0.54933  |
| C | -1.45705 | -1.47342 | -0.00734 |
| C | -2.56140 | -0.42908 | 0.13422  |
| H | -2.05451 | 0.72682  | -1.60680 |
| H | -2.93752 | 1.63739  | -0.39236 |
| H | -0.95277 | 1.64181  | 1.08946  |
| H | -0.54140 | 2.32451  | -0.47743 |
| H | 0.43634  | 0.15927  | -1.18261 |
| H | 0.65256  | -1.70134 | 0.41753  |
| H | -0.24098 | -0.78101 | 1.62744  |
| H | -1.32645 | -1.71942 | -1.06634 |
| H | -1.74062 | -2.39851 | 0.49827  |
| H | -2.75192 | -0.25058 | 1.19826  |
| H | -3.49391 | -0.79927 | -0.29627 |

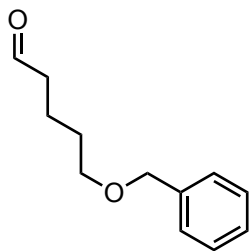

**Carbonyl 24**

M06-2X/def2-TZVP Geometry

|   |          |          |          |
|---|----------|----------|----------|
| C | 2.30402  | 1.23097  | 1.07796  |
| C | 1.46594  | 1.86586  | -0.04040 |
| O | 1.83781  | 1.86975  | -1.21382 |
| H | 1.63124  | 0.69348  | 1.74576  |
| H | 2.71335  | 2.05679  | 1.65810  |
| H | 0.52917  | 2.31928  | 0.28463  |
| C | 3.45963  | 0.29774  | 0.63190  |
| C | 3.07207  | -1.18728 | 0.42701  |
| H | 3.93752  | 0.68099  | -0.27272 |
| H | 4.24201  | 0.34101  | 1.39129  |
| C | 1.99061  | -1.46395 | -0.63002 |
| H | 2.75405  | -1.61998 | 1.37635  |
| H | 3.97045  | -1.73586 | 0.14270  |
| O | 0.72777  | -1.10342 | -0.08905 |
| H | 2.21614  | -0.90995 | -1.54383 |
| H | 1.97862  | -2.52499 | -0.88568 |
| C | -0.33378 | -1.11968 | -1.03744 |
| H | -0.52867 | -2.13868 | -1.37565 |
| H | -0.06455 | -0.51848 | -1.90906 |
| C | -3.93067 | 0.48056  | 0.71281  |
| C | -3.66412 | 0.69105  | -0.63859 |
| C | -2.50001 | 0.17324  | -1.20123 |
| C | -1.60221 | -0.55130 | -0.41113 |
| C | -1.87975 | -0.76076 | 0.94382  |
| C | -3.04368 | -0.24348 | 1.50683  |
| H | -4.83423 | 0.88177  | 1.14908  |
| H | -4.35728 | 1.25317  | -1.24792 |
| H | -2.29600 | 0.33943  | -2.24951 |
| H | -1.18827 | -1.32209 | 1.55660  |
| H | -3.25655 | -0.40432 | 2.55374  |

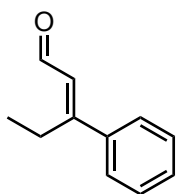

**Carbonyl 25**

M06-2X/def2-TZVP Geometry

|   |          |          |          |
|---|----------|----------|----------|
| C | -1.65413 | -0.77232 | -0.21584 |
| C | -3.11569 | -0.65207 | -0.21498 |
| O | -3.84755 | -1.61133 | -0.21634 |
| H | -3.54569 | 0.36400  | -0.20184 |
| C | -0.77810 | 0.24524  | -0.21673 |
| C | -1.16219 | 1.70189  | -0.23806 |
| H | -1.29651 | -1.79608 | -0.21486 |

|   |          |          |          |
|---|----------|----------|----------|
| C | 3.40708  | -0.64225 | 0.02385  |
| C | 2.95720  | 0.35929  | -0.82482 |
| C | 1.60541  | 0.65894  | -0.89672 |
| C | 0.67549  | -0.05112 | -0.13544 |
| C | 1.14218  | -1.05355 | 0.71707  |
| C | 2.49458  | -1.34556 | 0.79774  |
| H | 4.46313  | -0.87008 | 0.08510  |
| H | 3.66110  | 0.90993  | -1.43518 |
| H | 1.27359  | 1.43536  | -1.57330 |
| H | 0.43584  | -1.59014 | 1.33763  |
| H | 2.83680  | -2.12007 | 1.47172  |
| C | -0.87720 | 2.37005  | 1.10944  |
| H | -0.58754 | 2.20776  | -1.01630 |
| H | -2.20853 | 1.82923  | -0.50340 |
| H | -1.47018 | 1.90579  | 1.89833  |
| H | 0.17542  | 2.27312  | 1.37699  |
| H | -1.12476 | 3.43058  | 1.07267  |

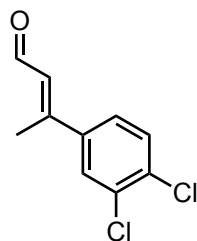

**Carbonyl 26**

M06-2X/def2-TZVP Geometry

|    |          |          |          |
|----|----------|----------|----------|
| C  | -3.11345 | -0.41385 | -0.19058 |
| C  | -4.55678 | -0.14718 | -0.18995 |
| O  | -5.36181 | -0.95352 | -0.58463 |
| H  | -4.90007 | 0.83023  | 0.18787  |
| C  | -2.15217 | 0.43194  | 0.21166  |
| C  | -2.40838 | 1.83413  | 0.69163  |
| H  | -2.85607 | -1.39121 | -0.58148 |
| C  | 1.95735  | -0.77795 | 0.06484  |
| C  | 0.95765  | -1.71869 | 0.27795  |
| C  | -0.36727 | -1.33353 | 0.32858  |
| C  | -0.73183 | 0.00558  | 0.16796  |
| C  | 0.27977  | 0.94331  | -0.02321 |
| C  | 1.61141  | 0.56081  | -0.08452 |
| Cl | 3.59798  | -1.28974 | 0.00709  |
| H  | 1.23723  | -2.75440 | 0.41288  |
| H  | -1.12471 | -2.07980 | 0.52499  |
| H  | 0.05008  | 1.99255  | -0.14378 |
| Cl | 2.81414  | 1.76680  | -0.34131 |

|   |          |         |          |
|---|----------|---------|----------|
| H | -2.10854 | 2.55465 | -0.07282 |
| H | -3.45225 | 2.01699 | 0.92231  |
| H | -1.81503 | 2.04165 | 1.58268  |

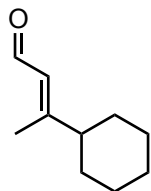

**Carbonyl 27**

M06-2X/def2-TZVP Geometry

|   |          |          |          |
|---|----------|----------|----------|
| C | 2.05699  | -0.34446 | -0.37004 |
| C | 3.47293  | -0.10737 | -0.07429 |
| O | 4.36486  | -0.72459 | -0.60343 |
| H | 3.71526  | 0.67663  | 0.66385  |
| C | 1.01523  | 0.29828  | 0.17542  |
| C | 1.13379  | 1.40087  | 1.18913  |
| H | 1.88503  | -1.12075 | -1.10873 |
| H | 0.40504  | 1.26217  | 1.98926  |
| H | 2.11945  | 1.47096  | 1.63779  |
| H | 0.90586  | 2.36021  | 0.71836  |
| C | -2.64832 | 0.67358  | -1.04576 |
| C | -1.26095 | 1.12010  | -0.59083 |
| C | -0.38721 | -0.08770 | -0.22919 |
| C | -1.07425 | -0.92612 | 0.86195  |
| C | -2.46642 | -1.36791 | 0.41550  |
| C | -3.33129 | -0.17158 | 0.02673  |
| H | -2.55407 | 0.08459  | -1.96404 |
| H | -3.25922 | 1.54444  | -1.29045 |
| H | -1.36817 | 1.76731  | 0.28581  |
| H | -0.77228 | 1.71177  | -1.36900 |
| H | -0.30910 | -0.72059 | -1.11958 |
| H | -0.45409 | -1.79278 | 1.09976  |
| H | -1.16373 | -0.33250 | 1.77772  |
| H | -2.36961 | -2.03701 | -0.44587 |
| H | -2.94639 | -1.94319 | 1.20941  |
| H | -3.50650 | 0.44798  | 0.91299  |
| H | -4.30934 | -0.50863 | -0.32148 |

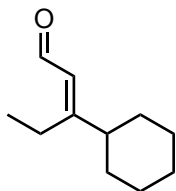

**Carbonyl 28**

M06-2X/def2-TZVP Geometry

|   |          |          |          |
|---|----------|----------|----------|
| C | 1.59212  | -0.85421 | -0.09632 |
| C | 3.03647  | -0.92507 | -0.33722 |
| O | 3.66000  | -1.95790 | -0.31656 |
| H | 3.56034  | 0.02692  | -0.53887 |
| C | 0.87504  | 0.27744  | -0.10088 |
| C | 1.48078  | 1.64385  | -0.31873 |
| H | 1.13018  | -1.81219 | 0.10908  |
| H | 0.71075  | 2.30898  | -0.71468 |
| C | 2.01240  | 2.22165  | 0.99621  |
| H | 2.27832  | 1.61709  | -1.05984 |
| C | -2.65704 | -0.76230 | 1.17309  |
| C | -1.16014 | -0.91804 | 0.91304  |
| C | -0.61214 | 0.28752  | 0.15144  |
| C | -1.37404 | 0.44544  | -1.17813 |
| C | -2.87542 | 0.58937  | -0.93960 |
| C | -3.42524 | -0.58507 | -0.13448 |
| H | -2.82425 | 0.11116  | 1.81245  |
| H | -3.03289 | -1.62915 | 1.71944  |
| H | -1.00186 | -1.82481 | 0.32082  |
| H | -0.61379 | -1.04850 | 1.84980  |
| H | -0.82308 | 1.18551  | 0.75003  |
| H | -0.99621 | 1.30313  | -1.73829 |
| H | -1.17851 | -0.44344 | -1.78723 |
| H | -3.06274 | 1.52026  | -0.39375 |
| H | -3.39700 | 0.67316  | -1.89499 |
| H | -3.33371 | -1.50036 | -0.72885 |
| H | -4.48889 | -0.44243 | 0.06507  |
| H | 1.23249  | 2.23477  | 1.75940  |
| H | 2.36736  | 3.24279  | 0.85720  |
| H | 2.83680  | 1.61695  | 1.37521  |

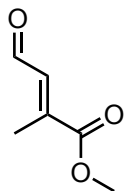

### Carbonyl 29

M06-2X/def2-TZVP Geometry

|   |          |          |          |
|---|----------|----------|----------|
| C | 1.17838  | -0.41441 | -0.00006 |
| C | 2.64614  | -0.27061 | -0.00010 |
| O | 3.38192  | -1.22327 | -0.00020 |
| H | 3.06093  | 0.75066  | -0.00005 |
| C | 0.30625  | 0.59788  | 0.00003  |
| C | 0.61403  | 2.06211  | 0.00009  |
| H | 0.82430  | -1.43741 | -0.00010 |
| H | 0.15730  | 2.53142  | -0.87204 |
| H | 1.67846  | 2.27096  | 0.00007  |
| H | 0.15735  | 2.53133  | 0.87229  |
| C | -1.16767 | 0.30621  | 0.00007  |
| O | -1.99950 | 1.17388  | 0.00014  |
| O | -1.46136 | -0.99489 | -0.00001 |
| C | -2.85467 | -1.30292 | 0.00003  |
| H | -3.33162 | -0.88798 | 0.88657  |
| H | -2.91831 | -2.38634 | -0.00004 |
| H | -3.33168 | -0.88787 | -0.88644 |

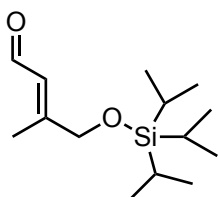

### Carbonyl 30

M06-2X/def2-TZVP Geometry

|   |          |          |          |
|---|----------|----------|----------|
| C | -2.98805 | -0.18783 | -0.46104 |
| C | -4.35724 | -0.71177 | -0.42117 |
| O | -4.64995 | -1.81272 | -0.81703 |
| H | -5.14120 | -0.05568 | -0.00402 |
| C | -2.60686 | 1.01384  | -0.02027 |
| C | -3.48581 | 2.05972  | 0.59874  |
| H | -2.24760 | -0.85441 | -0.88595 |
| H | -4.54376 | 1.82419  | 0.55009  |
| H | -3.32787 | 3.02030  | 0.10296  |
| H | -3.21421 | 2.19669  | 1.64868  |
| C | -1.16378 | 1.43723  | -0.10414 |

|    |          |          |          |
|----|----------|----------|----------|
| H  | -1.11511 | 2.34628  | -0.71949 |
| H  | -0.84350 | 1.73468  | 0.90622  |
| O  | -0.33262 | 0.45535  | -0.64385 |
| Si | 1.16954  | 0.01720  | -0.07497 |
| C  | 1.07463  | -0.12047 | 1.80362  |
| C  | 1.54814  | -1.57681 | -0.99344 |
| C  | 2.42664  | 1.33677  | -0.55825 |
| C  | 2.38275  | 1.57182  | -2.07264 |
| C  | 2.22458  | 2.65696  | 0.19196  |
| H  | 3.41900  | 0.94903  | -0.29895 |
| H  | 2.94508  | 3.40829  | -0.14182 |
| H  | 1.22732  | 3.06709  | 0.00867  |
| H  | 2.34475  | 2.54149  | 1.27036  |
| H  | 3.12081  | 2.31921  | -2.37465 |
| H  | 2.58213  | 0.65962  | -2.63829 |
| H  | 1.39832  | 1.93577  | -2.37744 |
| C  | 2.36038  | -0.71724 | 2.38721  |
| H  | 1.00065  | 0.91211  | 2.16734  |
| C  | -0.15881 | -0.87480 | 2.31153  |
| H  | 2.46584  | -1.76620 | 2.10008  |
| H  | 3.25423  | -0.18853 | 2.04716  |
| H  | 2.34807  | -0.68012 | 3.47937  |
| H  | -0.23065 | -0.80535 | 3.40022  |
| H  | -1.08775 | -0.48705 | 1.88783  |
| H  | -0.10790 | -1.93396 | 2.05640  |
| C  | 0.72972  | -2.77148 | -0.49407 |
| H  | 1.22327  | -1.35821 | -2.01865 |
| C  | 3.04017  | -1.92308 | -1.03459 |
| H  | 3.43475  | -2.10882 | -0.03283 |
| H  | 3.20671  | -2.83041 | -1.62084 |
| H  | 3.63746  | -1.12667 | -1.48148 |
| H  | 0.83789  | -3.62343 | -1.16975 |
| H  | 1.07571  | -3.09455 | 0.49069  |
| H  | -0.33427 | -2.54032 | -0.41589 |

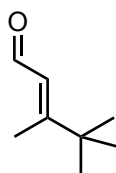

**Carbonyl 31**

M06-2X/def2-TZVP Geometry

|   |          |          |          |
|---|----------|----------|----------|
| C | -1.21277 | -0.37247 | -0.00121 |
| C | -2.59450 | 0.12347  | 0.00311  |
| O | -3.54938 | -0.61418 | -0.00863 |
| H | -2.75085 | 1.21543  | 0.01019  |

|   |          |          |          |
|---|----------|----------|----------|
| C | -0.10561 | 0.38278  | 0.00459  |
| C | -0.14682 | 1.88924  | 0.00284  |
| H | -1.15370 | -1.45267 | -0.02275 |
| H | -1.09079 | 2.28960  | 0.35796  |
| H | 0.64524  | 2.30258  | 0.62610  |
| H | 0.01896  | 2.26420  | -1.00979 |
| C | 1.28853  | -0.23870 | -0.00343 |
| C | 1.94561  | -0.00627 | 1.36766  |
| C | 1.26228  | -1.74392 | -0.26764 |
| C | 2.14158  | 0.42896  | -1.09267 |
| H | 3.12726  | -0.03807 | -1.12178 |
| H | 1.68049  | 0.31061  | -2.07544 |
| H | 2.28469  | 1.49323  | -0.90568 |
| H | 2.28548  | -2.11980 | -0.30999 |
| H | 0.74513  | -2.28508 | 0.52555  |
| H | 0.77631  | -1.97411 | -1.21712 |
| H | 2.94139  | -0.45376 | 1.37398  |
| H | 2.05882  | 1.05300  | 1.59799  |
| H | 1.35675  | -0.47027 | 2.16029  |

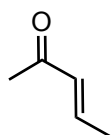

### Carbonyl 43

M06-2X/def2-TZVP Geometry

|   |          |          |          |
|---|----------|----------|----------|
| O | 1.98134  | -1.08067 | -0.00002 |
| C | 1.14485  | -0.20754 | 0.00001  |
| C | -0.29378 | -0.56636 | -0.00002 |
| C | 1.53971  | 1.25151  | 0.00004  |
| C | -1.29205 | 0.31223  | 0.00000  |
| C | -2.74006 | -0.04707 | -0.00002 |
| H | -0.48712 | -1.63420 | -0.00005 |
| H | 1.14056  | 1.75632  | 0.88106  |
| H | 2.62389  | 1.31877  | 0.00003  |
| H | 1.14055  | 1.75636  | -0.88094 |
| H | -1.06131 | 1.37404  | 0.00004  |
| H | -3.23881 | 0.37198  | -0.87667 |
| H | -2.88173 | -1.12653 | -0.00006 |
| H | -3.23883 | 0.37193  | 0.87664  |



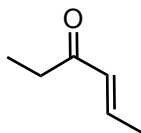

**Carbonyl 44**

M06-2X/def2-TZVP Geometry

|   |          |          |          |
|---|----------|----------|----------|
| O | -0.68049 | 1.36132  | 0.00001  |
| C | -0.52304 | 0.16341  | 0.00000  |
| C | 0.82914  | -0.46109 | -0.00000 |
| C | -1.69268 | -0.79673 | -0.00000 |
| C | 1.93081  | 0.28166  | -0.00000 |
| C | 3.32443  | -0.24479 | -0.00001 |
| H | 0.88379  | -1.54533 | -0.00001 |
| H | -1.57625 | -1.45145 | 0.87041  |
| C | -3.04029 | -0.10074 | 0.00000  |
| H | -1.57625 | -1.45144 | -0.87042 |
| H | 1.79876  | 1.36066  | 0.00001  |
| H | 3.86802  | 0.11649  | 0.87585  |
| H | 3.34457  | -1.33369 | -0.00001 |
| H | 3.86802  | 0.11650  | -0.87586 |
| H | -3.85210 | -0.82725 | 0.00000  |
| H | -3.14242 | 0.53728  | 0.87683  |
| H | -3.14243 | 0.53729  | -0.87682 |

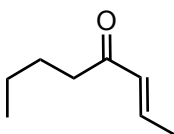

**Carbonyl 45**

M06-2X/def2-TZVP Geometry

|   |          |          |          |
|---|----------|----------|----------|
| O | -0.20727 | -0.99628 | -0.76780 |
| C | -0.47982 | 0.08581  | -0.30353 |
| C | -1.86410 | 0.44270  | 0.11403  |
| C | 0.55964  | 1.17508  | -0.13312 |
| C | -2.86226 | -0.42761 | 0.00508  |
| C | -4.27685 | -0.16863 | 0.39367  |
| H | -2.02985 | 1.43899  | 0.51190  |
| H | 0.47609  | 1.56602  | 0.88721  |
| C | 1.97929  | 0.72686  | -0.43797 |
| H | 0.24934  | 1.99909  | -0.78607 |
| H | -2.62175 | -1.40685 | -0.40099 |
| H | -4.60143 | -0.88648 | 1.15033  |
| H | -4.40992 | 0.83841  | 0.78641  |
| H | -4.93792 | -0.30061 | -0.46584 |
| C | 2.55590  | -0.19081 | 0.63522  |

|   |         |          |          |
|---|---------|----------|----------|
| H | 1.98641 | 0.20566  | -1.39816 |
| H | 2.62052 | 1.60598  | -0.54394 |
| C | 3.96733 | -0.65306 | 0.29883  |
| H | 2.55931 | 0.33759  | 1.59387  |
| H | 1.90169 | -1.05701 | 0.75138  |
| H | 4.64115 | 0.19866  | 0.18387  |
| H | 4.37371 | -1.29890 | 1.07752  |
| H | 3.97596 | -1.21235 | -0.63837 |

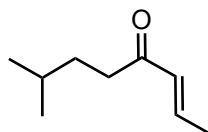

### Carbonyl 46

#### M06-2X/def2-TZVP Geometry

|   |          |          |          |
|---|----------|----------|----------|
| O | -0.57224 | -1.36407 | -0.19212 |
| C | -0.79595 | -0.29561 | 0.32689  |
| C | -2.14274 | 0.33888  | 0.28362  |
| C | 0.26711  | 0.47038  | 1.08761  |
| C | -3.15795 | -0.24258 | -0.34641 |
| C | -4.53844 | 0.30812  | -0.44660 |
| H | -2.26674 | 1.29388  | 0.78459  |
| H | -0.07127 | 0.50379  | 2.12997  |
| C | 1.65650  | -0.13850 | 0.98807  |
| H | 0.24567  | 1.51107  | 0.75051  |
| H | -2.95959 | -1.19768 | -0.82610 |
| H | -5.25914 | -0.39117 | -0.01671 |
| H | -4.62993 | 1.26457  | 0.06617  |
| H | -4.81997 | 0.44241  | -1.49344 |
| C | 2.31670  | -0.00337 | -0.38731 |
| H | 2.30804  | 0.32658  | 1.73500  |
| H | 1.58374  | -1.19860 | 1.24066  |
| C | 2.61443  | 1.45242  | -0.73705 |
| C | 3.60098  | -0.82545 | -0.42379 |
| H | 1.62780  | -0.41190 | -1.13146 |
| H | 3.11088  | 1.52335  | -1.70617 |
| H | 1.71154  | 2.06210  | -0.78893 |
| H | 3.27853  | 1.89584  | 0.01051  |
| H | 4.08684  | -0.75713 | -1.39842 |
| H | 4.30779  | -0.46260 | 0.32797  |
| H | 3.39998  | -1.87764 | -0.21736 |

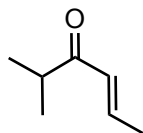

**Carbonyl 47**

M06-2X/def2-TZVP Geometry

|   |          |          |          |
|---|----------|----------|----------|
| O | -0.30822 | -1.50573 | 0.53736  |
| C | -0.25845 | -0.42215 | 0.00447  |
| C | 1.03534  | 0.26670  | -0.26524 |
| C | -1.51436 | 0.33028  | -0.40139 |
| C | 2.19280  | -0.27714 | 0.09574  |
| C | 3.53627  | 0.32278  | -0.13790 |
| H | 1.00354  | 1.22439  | -0.77521 |
| H | -1.33769 | 0.73010  | -1.40608 |
| C | -2.73184 | -0.57841 | -0.40815 |
| C | -1.70112 | 1.51392  | 0.55673  |
| H | 2.15041  | -1.23871 | 0.60095  |
| H | 4.15468  | -0.34966 | -0.73675 |
| H | 3.46681  | 1.28222  | -0.64859 |
| H | 4.05935  | 0.46665  | 0.81019  |
| H | -2.59258 | -1.42077 | -1.08499 |
| H | -2.90350 | -0.98435 | 0.58877  |
| H | -3.61826 | -0.02310 | -0.71686 |
| H | -2.57242 | 2.10016  | 0.26369  |
| H | -1.86247 | 1.14785  | 1.57238  |
| H | -0.83399 | 2.17517  | 0.56812  |

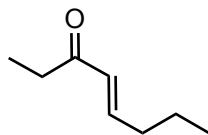

**Carbonyl 48**

M06-2X/def2-TZVP Geometry

|   |          |          |          |
|---|----------|----------|----------|
| O | -2.06516 | 1.36473  | 0.00000  |
| C | -1.62533 | 0.23940  | 0.00000  |
| C | -0.16314 | -0.04643 | -0.00000 |
| C | -2.53247 | -0.97213 | -0.00000 |
| C | 0.72453  | 0.94344  | 0.00000  |
| C | 2.21136  | 0.80512  | 0.00000  |
| H | 0.14029  | -1.08745 | -0.00000 |
| H | -2.26327 | -1.58017 | -0.87040 |
| C | -4.00727 | -0.61794 | 0.00000  |
| H | 0.32615  | 1.95520  | 0.00000  |
| C | 2.74986  | -0.61774 | -0.00000 |
| H | 2.60263  | 1.34839  | -0.86841 |
| H | 2.60263  | 1.34839  | 0.86841  |

|   |          |          |          |
|---|----------|----------|----------|
| H | -4.25872 | -0.02264 | -0.87678 |
| H | -4.62230 | -1.51718 | -0.00000 |
| H | -4.25872 | -0.02264 | 0.87678  |
| H | -2.26327 | -1.58017 | 0.87040  |
| C | 4.27271  | -0.65006 | -0.00000 |
| H | 2.36898  | -1.14884 | 0.87632  |
| H | 2.36898  | -1.14884 | -0.87633 |
| H | 4.67337  | -0.14561 | -0.88121 |
| H | 4.67337  | -0.14561 | 0.88121  |
| H | 4.64958  | -1.67266 | -0.00000 |

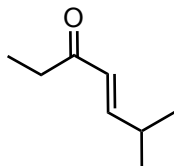

**Carbonyl 49**

M06-2X/def2-TZVP Geometry

|   |          |          |          |
|---|----------|----------|----------|
| O | -1.66569 | -1.37551 | -0.30412 |
| C | -1.42749 | -0.21152 | -0.08519 |
| C | -0.04087 | 0.33493  | -0.09127 |
| C | -2.52604 | 0.78592  | 0.21316  |
| C | 1.00138  | -0.45192 | -0.34011 |
| C | 2.44582  | -0.05710 | -0.36242 |
| H | 0.07680  | 1.39329  | 0.11309  |
| H | -2.29432 | 1.24593  | 1.17985  |
| C | -3.91304 | 0.17222  | 0.20411  |
| H | 0.78642  | -1.50131 | -0.53252 |
| C | 3.22082  | -0.91288 | 0.64617  |
| H | 2.82131  | -0.31115 | -1.36115 |
| C | 2.68377  | 1.42620  | -0.11841 |
| H | -3.98567 | -0.62282 | 0.94506  |
| H | -4.67113 | 0.92359  | 0.42240  |
| H | -4.12988 | -0.27113 | -0.76685 |
| H | -2.43799 | 1.59556  | -0.51932 |
| H | 2.88553  | -0.69400 | 1.66180  |
| H | 3.07101  | -1.97728 | 0.46257  |
| H | 4.28902  | -0.70162 | 0.58558  |
| H | 3.74825  | 1.65397  | -0.17960 |
| H | 2.16244  | 2.04304  | -0.85140 |
| H | 2.33763  | 1.71292  | 0.87726  |

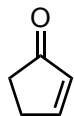

### Carbonyl 50

M06-2X/def2-TZVP Geometry

|   |          |          |          |
|---|----------|----------|----------|
| C | 1.46939  | -0.61752 | 0.00001  |
| C | 0.05016  | -1.19562 | 0.00001  |
| C | -0.88044 | 0.01602  | 0.00000  |
| C | -0.02475 | 1.22638  | -0.00001 |
| C | 1.25841  | 0.87391  | -0.00001 |
| O | -2.08255 | -0.01994 | -0.00000 |
| H | 2.04799  | -0.92170 | 0.87461  |
| H | 2.04799  | -0.92172 | -0.87458 |
| H | -0.16642 | -1.80439 | -0.87743 |
| H | -0.16642 | -1.80438 | 0.87746  |
| H | -0.43091 | 2.22706  | -0.00002 |
| H | 2.09156  | 1.56560  | -0.00002 |

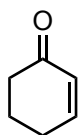

### Carbonyl 51

M06-2X/def2-TZVP Geometry

|   |          |          |          |
|---|----------|----------|----------|
| C | -1.80539 | 0.08111  | 0.12647  |
| C | -1.05557 | -1.15761 | -0.35288 |
| C | 0.32724  | -1.23146 | 0.28719  |
| C | 1.13502  | 0.02174  | 0.02086  |
| C | 0.37203  | 1.28919  | -0.04875 |
| C | -0.95835 | 1.31505  | 0.02861  |
| O | 2.33786  | 0.00222  | -0.09092 |
| H | -2.72392 | 0.22386  | -0.44603 |
| H | -2.11824 | -0.04602 | 1.17009  |
| H | -1.62703 | -2.05943 | -0.13126 |
| H | -0.94484 | -1.10494 | -1.43928 |
| H | 0.22664  | -1.31526 | 1.37570  |
| H | 0.90514  | -2.08866 | -0.05491 |
| H | 0.96124  | 2.19322  | -0.13966 |
| H | -1.47172 | 2.27139  | 0.02370  |

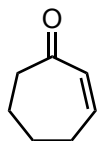

### Carbonyl 52

M06-2X/def2-TZVP Geometry

|   |          |          |          |
|---|----------|----------|----------|
| C | -0.53339 | -1.65878 | -0.04015 |
| C | 0.61216  | -1.02742 | 0.76284  |
| C | 1.30209  | 0.10333  | 0.03256  |
| C | 0.62477  | 1.42768  | 0.01486  |
| C | -0.68614 | 1.63037  | 0.13906  |
| O | 2.38974  | -0.03604 | -0.47644 |
| H | -1.08705 | -2.31559 | 0.63435  |
| H | -0.11421 | -2.29137 | -0.82415 |
| H | 0.21732  | -0.63145 | 1.70188  |
| H | 1.36588  | -1.77797 | 0.99588  |
| H | 1.29521  | 2.26671  | -0.13117 |
| C | -1.48988 | -0.64435 | -0.66837 |
| H | -2.43206 | -1.14407 | -0.89889 |
| C | -1.76664 | 0.58391  | 0.20713  |
| H | -1.08162 | -0.29326 | -1.61904 |
| H | -1.03095 | 2.65971  | 0.12684  |
| H | -1.92795 | 0.27690  | 1.24755  |
| H | -2.70037 | 1.05040  | -0.10932 |

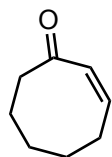

### Carbonyl 53

M06-2X/def2-TZVP Geometry

|   |          |          |          |
|---|----------|----------|----------|
| C | -0.04225 | -1.78941 | 0.15210  |
| C | 0.90665  | -0.85469 | 0.93084  |
| C | 1.50081  | 0.22632  | 0.05349  |
| C | 0.75313  | 1.48057  | -0.23277 |
| C | -0.52963 | 1.76657  | 0.00108  |
| O | 2.59677  | 0.07907  | -0.43968 |
| H | 0.58143  | -2.49953 | -0.39401 |
| H | -0.62467 | -2.37253 | 0.87053  |
| H | 0.40949  | -0.40163 | 1.78585  |
| H | 1.74544  | -1.43818 | 1.30839  |
| H | 1.36814  | 2.21327  | -0.74364 |
| C | -0.98192 | -1.12828 | -0.85798 |
| H | -0.86430 | 2.74107  | -0.34287 |
| C | -1.59567 | 0.91100  | 0.62751  |

|   |          |          |          |
|---|----------|----------|----------|
| C | -2.07695 | -0.24076 | -0.27468 |
| H | -2.45387 | 1.54225  | 0.85963  |
| H | -1.25725 | 0.50725  | 1.57983  |
| H | -1.46630 | -1.92050 | -1.43328 |
| H | -0.39278 | -0.55751 | -1.57998 |
| H | -2.65613 | 0.17926  | -1.10074 |
| H | -2.76832 | -0.85366 | 0.31025  |

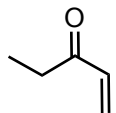

**Carbonyl 55**

M06-2X/def2-TZVP Geometry

|   |          |          |          |
|---|----------|----------|----------|
| C | -2.22999 | -0.78171 | -0.00001 |
| C | -1.56191 | 0.36399  | -0.00001 |
| C | -0.07663 | 0.47816  | 0.00000  |
| C | 0.75803  | -0.78638 | 0.00000  |
| O | 0.43301  | 1.57337  | 0.00000  |
| C | 2.24894  | -0.49814 | 0.00001  |
| H | -3.31208 | -0.80106 | -0.00002 |
| H | -1.72550 | -1.74013 | -0.00001 |
| H | -2.07583 | 1.31855  | -0.00001 |
| H | 0.47098  | -1.38013 | 0.87276  |
| H | 0.47098  | -1.38013 | -0.87276 |
| H | 2.81882  | -1.42656 | 0.00001  |
| H | 2.52896  | 0.08352  | -0.87697 |
| H | 2.52896  | 0.08352  | 0.87699  |

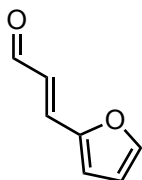

**Carbonyl 56**

M06-2X/def2-TZVP Geometry

|   |          |          |          |
|---|----------|----------|----------|
| C | 1.60055  | -0.20477 | -0.00001 |
| C | 0.59083  | 0.67306  | 0.00003  |
| C | 2.98464  | 0.27503  | 0.00001  |
| O | 3.95288  | -0.44036 | -0.00003 |
| C | -0.80705 | 0.34403  | 0.00002  |
| O | -1.16882 | -0.96458 | -0.00004 |
| C | -2.51491 | -1.00822 | -0.00004 |
| C | -3.03801 | 0.24183  | 0.00002  |
| C | -1.92289 | 1.12701  | 0.00006  |
| H | 1.43760  | -1.27530 | -0.00006 |

|   |          |          |          |
|---|----------|----------|----------|
| H | 0.81130  | 1.73656  | 0.00008  |
| H | 3.09509  | 1.37851  | 0.00005  |
| H | -2.95613 | -1.98968 | -0.00008 |
| H | -4.08319 | 0.49765  | 0.00003  |
| H | -1.93623 | 2.20398  | 0.00010  |

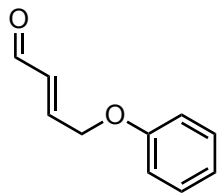

### Carbonyl 57

M06-2X/def2-TZVP Geometry

|   |          |          |          |
|---|----------|----------|----------|
| C | -2.83471 | 0.10735  | 0.00000  |
| C | -2.19215 | -1.05525 | -0.00000 |
| C | -4.30591 | 0.13013  | -0.00000 |
| O | -4.96706 | 1.13390  | -0.00000 |
| C | -0.71401 | -1.23159 | 0.00000  |
| H | -2.31379 | 1.05593  | 0.00000  |
| H | -2.76421 | -1.98011 | -0.00000 |
| H | -4.78899 | -0.86810 | -0.00000 |
| H | -0.41784 | -1.81305 | 0.88328  |
| H | -0.41784 | -1.81305 | -0.88328 |
| O | -0.08573 | 0.02231  | 0.00000  |
| C | 4.04431  | 0.34262  | -0.00000 |
| C | 3.22139  | 1.46538  | -0.00000 |
| C | 1.84702  | 1.32810  | -0.00000 |
| C | 1.27608  | 0.05681  | 0.00000  |
| C | 2.08686  | -1.07201 | 0.00000  |
| C | 3.47019  | -0.91573 | 0.00000  |
| H | 5.11999  | 0.45309  | -0.00000 |
| H | 3.65617  | 2.45651  | -0.00000 |
| H | 1.19147  | 2.18866  | -0.00000 |
| H | 1.66555  | -2.06665 | 0.00000  |
| H | 4.09744  | -1.79783 | 0.00000  |

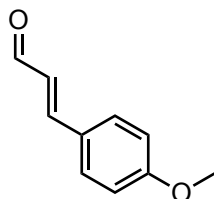

### Carbonyl 58

M06-2X/def2-TZVP Geometry

|   |         |          |          |
|---|---------|----------|----------|
| C | 2.93708 | -0.24166 | -0.00012 |
| C | 1.89371 | 0.59535  | -0.00009 |



|   |          |          |          |
|---|----------|----------|----------|
| C | 4.30100  | 0.29083  | -0.00019 |
| O | 5.29770  | -0.38566 | -0.00021 |
| H | 2.83940  | -1.32039 | -0.00008 |
| H | 2.11367  | 1.66147  | -0.00013 |
| H | 4.36831  | 1.39775  | -0.00023 |
| C | -2.27141 | -0.29919 | 0.00010  |
| C | -1.33744 | -1.34157 | 0.00007  |
| C | 0.00859  | -1.06531 | 0.00001  |
| C | 0.47568  | 0.25756  | -0.00003 |
| C | -0.46810 | 1.27988  | 0.00001  |
| C | -1.83193 | 1.02015  | 0.00007  |
| O | -3.56886 | -0.67169 | 0.00016  |
| H | -1.70511 | -2.35883 | 0.00009  |
| H | 0.71299  | -1.88675 | -0.00002 |
| H | -0.13003 | 2.30948  | -0.00002 |
| H | -2.53094 | 1.84321  | 0.00009  |
| C | -4.54945 | 0.34352  | 0.00019  |
| H | -4.46758 | 0.96942  | -0.89202 |
| H | -5.51015 | -0.16333 | 0.00023  |
| H | -4.46751 | 0.96943  | 0.89238  |

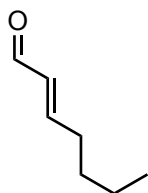

### Carbonyl 59

M06-2X/def2-TZVP Geometry

|   |          |          |          |
|---|----------|----------|----------|
| O | 4.23591  | -0.40535 | -0.41265 |
| C | 3.21718  | -0.33713 | 0.22376  |
| C | 1.96911  | 0.26087  | -0.26920 |
| C | 0.88424  | 0.29615  | 0.50124  |
| C | -0.44392 | 0.85238  | 0.11373  |
| C | -1.54767 | -0.20771 | 0.16190  |
| C | -2.91778 | 0.35752  | -0.19106 |
| C | -4.01189 | -0.70100 | -0.14731 |
| H | 3.16509  | -0.73821 | 1.25618  |
| H | 1.98049  | 0.66511  | -1.27566 |
| H | 0.95192  | -0.13440 | 1.50004  |
| H | -0.70601 | 1.66103  | 0.80460  |
| H | -0.38721 | 1.28837  | -0.88600 |
| H | -1.58256 | -0.65013 | 1.16269  |
| H | -1.29573 | -1.01964 | -0.52649 |
| H | -2.87576 | 0.80467  | -1.18829 |
| H | -4.98475 | -0.28082 | -0.40241 |

|   |          |          |          |
|---|----------|----------|----------|
| H | -3.16019 | 1.16964  | 0.50046  |
| H | -4.08770 | -1.14121 | 0.84868  |
| H | -3.80041 | -1.50811 | -0.85101 |

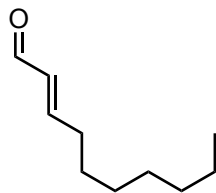

### Carbonyl 60

M06-2X/def2-TZVP Geometry

|   |          |          |          |
|---|----------|----------|----------|
| O | -6.06903 | -0.67822 | -0.51150 |
| C | -5.09578 | -0.45565 | 0.15988  |
| C | -3.85960 | 0.15524  | -0.34687 |
| C | -2.82658 | 0.36749  | 0.46533  |
| C | -1.51408 | 0.95640  | 0.07298  |
| C | -0.35284 | -0.01052 | 0.32119  |
| C | 0.99830  | 0.59479  | -0.03684 |
| C | 2.16040  | -0.36127 | 0.20058  |
| C | 3.51356  | 0.24077  | -0.15597 |
| C | 4.67728  | -0.71410 | 0.08060  |
| H | -5.08037 | -0.71048 | 1.23893  |
| H | -3.83584 | 0.41959  | -1.39857 |
| H | -2.92726 | 0.07043  | 1.50901  |
| H | -1.53801 | 1.25048  | -0.97853 |
| H | -1.34284 | 1.86570  | 0.65924  |
| H | -0.35101 | -0.31165 | 1.37357  |
| H | -0.51516 | -0.92184 | -0.26142 |
| H | 0.99044  | 0.90223  | -1.08777 |
| H | 2.00405  | -1.27348 | -0.38481 |
| H | 3.50773  | 0.54963  | -1.20688 |
| H | 3.67052  | 1.15331  | 0.42932  |
| H | 4.68083  | -1.02226 | 1.13023  |
| H | 4.51930  | -1.62422 | -0.50537 |
| H | 1.15307  | 1.50733  | 0.54855  |
| H | 2.16688  | -0.66961 | 1.25148  |
| C | 6.02344  | -0.09865 | -0.27868 |
| H | 6.04966  | 0.19166  | -1.33075 |
| H | 6.21223  | 0.79720  | 0.31600  |
| H | 6.84349  | -0.79533 | -0.10347 |

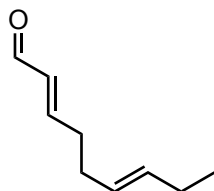

**Carbonyl 61**

M06-2X/def2-TZVP Geometry

|   |          |          |          |
|---|----------|----------|----------|
| O | -3.22816 | -1.87702 | -0.24798 |
| C | -2.65439 | -0.98666 | 0.32298  |
| C | -1.99684 | 0.14218  | -0.34839 |
| C | -1.36596 | 1.07533  | 0.35970  |
| C | -0.63298 | 2.24935  | -0.19615 |
| C | 0.85391  | 2.23170  | 0.20543  |
| C | 1.57556  | 1.05422  | -0.37318 |
| C | 2.09841  | 0.06185  | 0.33357  |
| C | 2.75508  | -1.15472 | -0.24066 |
| C | 1.98927  | -2.42930 | 0.11665  |
| H | -2.58579 | -0.97374 | 1.42961  |
| H | -2.04352 | 0.16684  | -1.43171 |
| H | -1.35277 | 0.97269  | 1.44475  |
| H | -0.72518 | 2.26396  | -1.28413 |
| H | -1.08843 | 3.16841  | 0.18391  |
| H | 1.31205  | 3.16209  | -0.13942 |
| H | 0.93684  | 2.21664  | 1.29512  |
| H | 1.63211  | 1.01244  | -1.45980 |
| H | 2.02692  | 0.09941  | 1.42008  |
| H | 2.82622  | -1.05158 | -1.32535 |
| H | 3.77762  | -1.23180 | 0.14033  |
| H | 0.97619  | -2.39350 | -0.28606 |
| H | 2.48671  | -3.31343 | -0.28237 |
| H | 1.91393  | -2.54600 | 1.19925  |

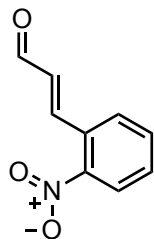

**Carbonyl 62**

M06-2X/def2-TZVP Geometry

|   |          |          |          |
|---|----------|----------|----------|
| O | -4.68507 | 0.18676  | -0.20904 |
| C | -3.62513 | -0.24431 | 0.15976  |
| C | -2.33490 | 0.40213  | -0.12730 |

|   |          |          |          |
|---|----------|----------|----------|
| C | -1.20254 | -0.12884 | 0.33335  |
| C | 0.12455  | 0.47566  | 0.13996  |
| C | 0.25092  | 1.86730  | 0.14735  |
| C | 1.48022  | 2.48698  | 0.00260  |
| C | 2.63561  | 1.72957  | -0.13290 |
| C | 2.55034  | 0.34863  | -0.12202 |
| C | 1.30997  | -0.25143 | 0.00422  |
| H | -3.56135 | -1.17684 | 0.75345  |
| H | -2.36277 | 1.29712  | -0.73820 |
| H | -1.25652 | -1.05545 | 0.89298  |
| H | -0.63825 | 2.46428  | 0.29927  |
| H | 1.53727  | 3.56739  | 0.00931  |
| H | 3.59837  | 2.20945  | -0.24183 |
| H | 3.42598  | -0.27626 | -0.21895 |
| N | 1.28999  | -1.72610 | -0.04739 |
| O | 0.27149  | -2.26311 | -0.42225 |
| O | 2.30023  | -2.30629 | 0.27449  |

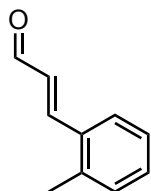

**Carbonyl 63**

M06-2X/def2-TZVP Geometry

|   |          |          |          |
|---|----------|----------|----------|
| O | 4.44867  | -0.42922 | -0.17152 |
| C | 3.43297  | 0.17244  | 0.06324  |
| C | 2.08544  | -0.38453 | -0.09812 |
| C | 1.01438  | 0.36022  | 0.19212  |
| C | -0.38832 | -0.05253 | 0.10025  |
| C | -0.73190 | -1.40633 | 0.12765  |
| C | -2.05097 | -1.81136 | 0.03585  |
| C | -3.05206 | -0.85747 | -0.08377 |
| C | -2.72276 | 0.48925  | -0.10439 |
| C | -1.40217 | 0.91493  | -0.00906 |
| C | -1.08640 | 2.38612  | -0.04295 |
| H | 3.46464  | 1.21951  | 0.42651  |
| H | 2.02093  | -1.39994 | -0.47065 |
| H | 1.19939  | 1.37872  | 0.52350  |
| H | 0.04778  | -2.14773 | 0.24597  |
| H | -2.29809 | -2.86420 | 0.06509  |
| H | -4.08850 | -1.16076 | -0.15529 |
| H | -3.50715 | 1.23064  | -0.19726 |
| H | -1.99533 | 2.96704  | -0.18705 |
| H | -0.62467 | 2.71700  | 0.88992  |
| H | -0.39767 | 2.62912  | -0.85354 |

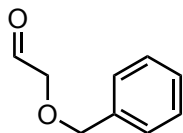

### Carbonyl 79

M06-2X/def2-TZVP Geometry

|   |          |          |          |
|---|----------|----------|----------|
| C | 0.89477  | 0.64672  | 0.24806  |
| C | -0.28769 | 1.53522  | 0.55369  |
| O | -1.48026 | 0.81273  | 0.77438  |
| C | 1.12012  | -0.49339 | 1.01551  |
| C | 2.20894  | -1.31007 | 0.75513  |
| C | 3.08935  | -0.99216 | -0.27265 |
| C | 2.87048  | 0.14093  | -1.04080 |
| C | 1.77256  | 0.95301  | -0.78329 |
| C | -1.95720 | 0.16025  | -0.37192 |
| C | -3.24755 | -0.53655 | -0.01396 |
| O | -3.91976 | -1.11785 | -0.81561 |
| H | -0.11256 | 2.09352  | 1.47460  |
| H | -0.42917 | 2.25790  | -0.25940 |
| H | 0.42830  | -0.73825 | 1.81271  |
| H | 2.37486  | -2.19552 | 1.35512  |
| H | 3.94011  | -1.62957 | -0.47509 |
| H | 3.54820  | 0.39000  | -1.84701 |
| H | 1.59582  | 1.83205  | -1.39267 |
| H | -1.24698 | -0.58913 | -0.74415 |
| H | -2.15313 | 0.86845  | -1.18786 |
| H | -3.52808 | -0.47227 | 1.05487  |

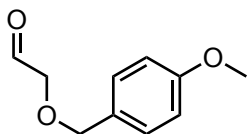

### Carbonyl 80

M06-2X/def2-TZVP Geometry

|   |          |          |          |
|---|----------|----------|----------|
| C | -0.10014 | 1.06809  | -0.06948 |
| C | -1.44762 | 1.71929  | -0.24206 |
| O | -2.50747 | 0.94173  | 0.28275  |
| C | 0.72452  | 0.80672  | -1.14897 |
| C | 1.96859  | 0.20082  | -0.98653 |
| C | 2.38783  | -0.15952 | 0.28762  |
| C | 1.56025  | 0.09039  | 1.38623  |
| C | 0.33688  | 0.69724  | 1.20497  |

|   |          |          |          |
|---|----------|----------|----------|
| C | -2.69730 | -0.27143 | -0.39291 |
| C | -3.88108 | -0.97411 | 0.22568  |
| O | -4.34264 | -1.98739 | -0.21391 |
| O | 3.57230  | -0.75559 | 0.56414  |
| C | 4.43822  | -1.02912 | -0.51413 |
| H | -1.49288 | 2.66408  | 0.30089  |
| H | -1.62681 | 1.92651  | -1.30442 |
| H | 0.39909  | 1.07723  | -2.14725 |
| H | 2.58612  | 0.01366  | -1.85260 |
| H | 1.90854  | -0.20063 | 2.36827  |
| H | -0.30328 | 0.88467  | 2.05922  |
| H | -2.89802 | -0.11437 | -1.46115 |
| H | -1.82144 | -0.92822 | -0.31235 |
| H | -4.29314 | -0.48169 | 1.12726  |
| H | 4.73066  | -0.10994 | -1.02895 |
| H | 5.31894  | -1.49897 | -0.08519 |
| H | 3.97386  | -1.71258 | -1.23010 |

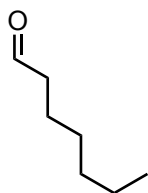

### Carbonyl 85

#### M06-2X/def2-TZVP Geometry

|   |          |          |          |
|---|----------|----------|----------|
| C | 2.35456  | -0.87750 | 0.21501  |
| C | 2.98310  | 0.48996  | 0.20316  |
| O | 2.52985  | 1.44487  | -0.36419 |
| C | 0.98974  | -0.94054 | -0.45278 |
| C | -0.10585 | -0.27241 | 0.37121  |
| C | -1.46570 | -0.31686 | -0.31305 |
| C | -2.57222 | 0.33317  | 0.50845  |
| C | -3.92525 | 0.28675  | -0.18964 |
| H | 3.07689  | -1.54476 | -0.26994 |
| H | 2.31092  | -1.21139 | 1.25809  |
| H | 3.94049  | 0.57456  | 0.75540  |
| H | 1.05239  | -0.45642 | -1.43030 |
| H | 0.72424  | -1.98576 | -0.62937 |
| H | -0.17563 | -0.76619 | 1.34701  |
| H | 0.16961  | 0.76809  | 0.56173  |
| H | -1.39587 | 0.18366  | -1.28454 |
| H | -1.73538 | -1.35797 | -0.52297 |
| H | -2.64057 | -0.16716 | 1.47901  |
| H | -2.29981 | 1.37170  | 0.71705  |
| H | -4.70442 | 0.75617  | 0.41140  |

|   |          |          |          |
|---|----------|----------|----------|
| H | -3.88449 | 0.80531  | -1.14941 |
| H | -4.22741 | -0.74428 | -0.38386 |

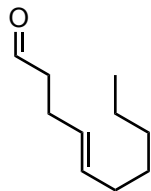

### Carbonyl 86

M06-2X/def2-TZVP Geometry

|   |          |          |          |
|---|----------|----------|----------|
| C | -2.87237 | -1.00986 | -0.57695 |
| C | -1.87150 | -1.88837 | 0.12540  |
| O | -1.28690 | -1.58777 | 1.12881  |
| C | -2.90434 | 0.42342  | -0.05256 |
| C | -1.69228 | 1.19505  | -0.48320 |
| C | -0.74277 | 1.62825  | 0.33346  |
| C | 0.50297  | 2.34289  | -0.08889 |
| C | 1.76900  | 1.59495  | 0.34286  |
| C | 1.86742  | 0.19550  | -0.25040 |
| C | 3.15169  | -0.52865 | 0.13300  |
| C | 3.21357  | -1.94148 | -0.43325 |
| H | -2.65183 | -1.04163 | -1.64915 |
| H | -3.84471 | -1.50408 | -0.46375 |
| H | -1.70656 | -2.88176 | -0.33773 |
| H | -3.80886 | 0.91129  | -0.42363 |
| H | -2.96179 | 0.40524  | 1.03656  |
| H | -1.59107 | 1.37482  | -1.55273 |
| H | -0.83957 | 1.41894  | 1.39778  |
| H | 0.50076  | 2.46953  | -1.17516 |
| H | 0.51629  | 3.34480  | 0.35081  |
| H | 2.64680  | 2.18011  | 0.05410  |
| H | 1.78854  | 1.52383  | 1.43530  |
| H | 1.00815  | -0.39669 | 0.07796  |
| H | 1.79777  | 0.26005  | -1.34296 |
| H | 4.01366  | 0.04857  | -0.21503 |
| H | 3.22745  | -0.56717 | 1.22363  |
| H | 4.13648  | -2.44947 | -0.15176 |
| H | 2.37598  | -2.53893 | -0.06771 |
| H | 3.15929  | -1.92561 | -1.52382 |

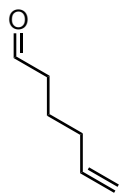

**Carbonyl 87**

M06-2X/def2-TZVP Geometry

|   |          |          |          |
|---|----------|----------|----------|
| C | -0.95642 | 0.37137  | 0.98565  |
| C | -1.81592 | -0.67023 | 0.32378  |
| O | -2.04247 | -0.72352 | -0.85371 |
| C | -0.26861 | 1.31955  | 0.01559  |
| C | 0.83818  | 0.64182  | -0.80347 |
| C | 1.95147  | 0.12817  | 0.05635  |
| C | 2.29687  | -1.14642 | 0.16629  |
| H | -1.61119 | 0.91113  | 1.67946  |
| H | -0.23278 | -0.15485 | 1.61763  |
| H | -2.26501 | -1.41609 | 1.00965  |
| H | 0.15684  | 2.15528  | 0.57646  |
| H | -1.01206 | 1.73279  | -0.66770 |
| H | 1.23795  | 1.37433  | -1.51010 |
| H | 0.41253  | -0.17353 | -1.38992 |
| H | 2.49113  | 0.87364  | 0.63739  |
| H | 3.10741  | -1.46375 | 0.80961  |
| H | 1.78146  | -1.91628 | -0.39787 |

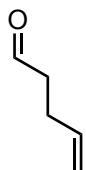

**Carbonyl 93**

M06-2X/def2-TZVP Geometry

|   |          |          |          |
|---|----------|----------|----------|
| C | 0.39078  | 0.64860  | -0.00000 |
| C | 1.88865  | 0.52184  | 0.00000  |
| O | 2.48200  | -0.52047 | 0.00001  |
| C | -2.54767 | 0.50580  | -0.00001 |
| C | -1.82017 | -0.60174 | -0.00000 |
| C | -0.32403 | -0.68778 | 0.00000  |
| H | 0.11614  | 1.25456  | 0.87112  |
| H | 0.11615  | 1.25455  | -0.87114 |
| H | 2.44460  | 1.48032  | 0.00001  |
| H | -3.62866 | 0.46272  | -0.00001 |
| H | -2.10201 | 1.49312  | -0.00001 |
| H | -2.33346 | -1.55904 | 0.00000  |



|   |         |          |          |
|---|---------|----------|----------|
| H | 0.00290 | -1.27139 | -0.86531 |
| H | 0.00290 | -1.27138 | 0.86531  |

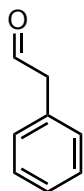

### Carbonyl 94

M06-2X/def2-TZVP Geometry

|   |          |          |          |
|---|----------|----------|----------|
| C | -1.48669 | -0.59227 | 0.69199  |
| C | -2.35976 | -0.20524 | -0.47957 |
| O | -3.24814 | 0.59636  | -0.42305 |
| C | -0.04592 | -0.27476 | 0.37316  |
| C | 0.86113  | -1.27529 | 0.04210  |
| C | 2.17371  | -0.95973 | -0.28390 |
| C | 2.59089  | 0.36283  | -0.28495 |
| C | 1.68992  | 1.36939  | 0.03881  |
| C | 0.38000  | 1.05191  | 0.36226  |
| H | -1.83605 | -0.05258 | 1.57185  |
| H | -1.60197 | -1.66565 | 0.86282  |
| H | -2.10555 | -0.70487 | -1.43571 |
| H | 0.54061  | -2.31053 | 0.04757  |
| H | 2.87050  | -1.74914 | -0.53430 |
| H | 3.61399  | 0.60977  | -0.53635 |
| H | 2.00874  | 2.40361  | 0.03869  |
| H | -0.32481 | 1.83750  | 0.61038  |

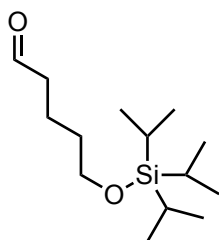

### Carbonyl 95

M06-2X/def2-TZVP Geometry

|   |          |          |          |
|---|----------|----------|----------|
| C | -3.33566 | -0.10526 | -1.06067 |
| C | -2.79976 | -1.24730 | -0.23507 |
| O | -3.01661 | -1.38550 | 0.93908  |
| C | -1.29955 | 1.24343  | 0.81216  |
| C | -2.41807 | 1.98485  | 0.09564  |
| C | -3.64742 | 1.14011  | -0.23817 |

|    |          |          |          |
|----|----------|----------|----------|
| O  | -0.61581 | 0.39287  | -0.09791 |
| Si | 1.00455  | 0.03237  | 0.00871  |
| C  | 1.95778  | 1.63970  | 0.26867  |
| C  | 1.32456  | -1.15149 | 1.43727  |
| C  | 1.47550  | -0.74484 | -1.64626 |
| C  | 1.53818  | 2.71818  | -0.73357 |
| C  | 3.47046  | 1.40274  | 0.20793  |
| C  | 0.30454  | -1.43565 | -2.35109 |
| C  | 2.66068  | -1.70971 | -1.51850 |
| C  | 0.37684  | -2.35503 | 1.37028  |
| C  | 1.22218  | -0.46632 | 2.80419  |
| H  | -2.62885 | 0.10641  | -1.86504 |
| H  | -4.24479 | -0.49216 | -1.53676 |
| H  | -2.21131 | -2.00521 | -0.78490 |
| H  | -0.60120 | 1.96898  | 1.24403  |
| H  | -1.70934 | 0.64230  | 1.63038  |
| H  | -2.73050 | 2.82146  | 0.72590  |
| H  | -2.00008 | 2.41321  | -0.82078 |
| H  | -4.35880 | 1.76256  | -0.78340 |
| H  | -4.13815 | 0.82792  | 0.68612  |
| H  | 1.71781  | 2.00066  | 1.27522  |
| H  | 2.35250  | -1.51532 | 1.31903  |
| H  | 1.79315  | 0.09210  | -2.28057 |
| H  | 0.46852  | 2.93037  | -0.68260 |
| H  | 1.76189  | 2.41070  | -1.75828 |
| H  | 2.07578  | 3.65250  | -0.55140 |
| H  | 3.79733  | 0.63556  | 0.91425  |
| H  | 3.77323  | 1.08455  | -0.79318 |
| H  | 4.02010  | 2.31957  | 0.43557  |
| H  | 0.60508  | -1.79132 | -3.34025 |
| H  | -0.03631 | -2.30496 | -1.78376 |
| H  | -0.54517 | -0.76381 | -2.47295 |
| H  | 2.38473  | -2.58864 | -0.93106 |
| H  | 2.97943  | -2.06186 | -2.50285 |
| H  | 3.52494  | -1.25152 | -1.03419 |
| H  | 0.59368  | -3.06538 | 2.17245  |
| H  | 0.46226  | -2.89351 | 0.42357  |
| H  | -0.66382 | -2.04086 | 1.47999  |
| H  | 1.39323  | -1.18443 | 3.61049  |
| H  | 0.22745  | -0.04065 | 2.95975  |
| H  | 1.95132  | 0.33813  | 2.91697  |

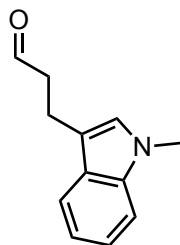

**Carbonyl 96**

M06-2X/def2-TZVP Geometry

|   |          |          |          |
|---|----------|----------|----------|
| C | 2.63154  | -1.36501 | -0.21945 |
| C | 3.39354  | -0.27353 | -0.92065 |
| O | 3.55640  | 0.83237  | -0.48348 |
| C | 0.66347  | -0.07917 | 0.65746  |
| C | 1.87655  | -0.87761 | 1.01511  |
| C | 0.55946  | 1.27686  | 0.55406  |
| N | -0.70853 | 1.63749  | 0.16174  |
| C | -1.45238 | 0.49877  | -0.00142 |
| C | -0.62324 | -0.60510 | 0.29855  |
| C | -1.19204 | 2.97858  | -0.04793 |
| C | -2.78418 | 0.34733  | -0.38484 |
| C | -3.27919 | -0.93937 | -0.46809 |
| C | -2.47275 | -2.05132 | -0.17550 |
| C | -1.15514 | -1.89564 | 0.20630  |
| H | 1.95414  | -1.82429 | -0.94658 |
| H | 3.36795  | -2.13783 | 0.03308  |
| H | 3.83712  | -0.55504 | -1.89608 |
| H | 1.57984  | -1.74079 | 1.61454  |
| H | 2.55124  | -0.27711 | 1.62620  |
| H | 1.31569  | 2.02884  | 0.71723  |
| H | -1.53895 | 3.10844  | -1.07483 |
| H | -2.01504 | 3.20585  | 0.63257  |
| H | -0.38065 | 3.67843  | 0.13744  |
| H | -3.40841 | 1.20325  | -0.60871 |
| H | -4.30856 | -1.09476 | -0.76344 |
| H | -2.89649 | -3.04415 | -0.25029 |
| H | -0.54314 | -2.76096 | 0.43295  |

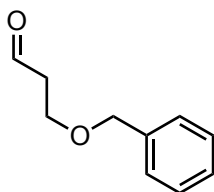

**Carbonyl 97**

M06-2X/def2-TZVP Geometry

|   |          |          |          |
|---|----------|----------|----------|
| C | -3.24149 | 1.02041  | -0.01187 |
| O | -2.32292 | 1.77208  | -0.17882 |
| C | -3.12053 | -0.35695 | 0.58750  |
| C | -1.69409 | -0.84357 | 0.69806  |
| O | -1.24232 | -1.12481 | -0.60736 |
| C | 0.06338  | -1.64608 | -0.65337 |
| C | 1.14251  | -0.64932 | -0.29446 |
| C | 2.36596  | -1.09709 | 0.19160  |
| C | 3.38467  | -0.19836 | 0.47465  |
| C | 3.18101  | 1.16162  | 0.28560  |
| C | 1.95649  | 1.61413  | -0.18728 |
| C | 0.94137  | 0.71413  | -0.48095 |
| H | -4.27030 | 1.32910  | -0.28235 |
| H | -3.59628 | -0.31626 | 1.57354  |
| H | -3.71521 | -1.05046 | -0.01305 |
| H | -1.06810 | -0.07904 | 1.16991  |
| H | -1.64890 | -1.75270 | 1.31076  |
| H | 0.14360  | -2.52410 | 0.00163  |
| H | 0.20652  | -1.98712 | -1.68076 |
| H | 2.52284  | -2.15836 | 0.35143  |
| H | 4.33358  | -0.55884 | 0.85072  |
| H | 3.97096  | 1.86585  | 0.51238  |
| H | 1.78770  | 2.67414  | -0.32742 |
| H | -0.02011 | 1.06615  | -0.83422 |

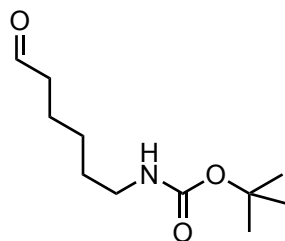

**Carbonyl 98**

M06-2X/def2-TZVP Geometry

|   |          |          |          |
|---|----------|----------|----------|
| C | 3.00622  | 2.14284  | -0.13588 |
| O | 2.03600  | 1.86200  | -0.78790 |
| C | 4.00211  | 1.14458  | 0.38828  |
| C | 3.61411  | -0.29623 | 0.09885  |
| C | 2.45943  | -0.77040 | 0.98157  |
| C | 1.76746  | -2.03075 | 0.47133  |
| C | 1.07169  | -1.83414 | -0.87830 |
| N | 0.17464  | -0.69788 | -0.89916 |
| C | -1.06328 | -0.79494 | -0.35804 |
| O | -1.65351 | 0.41500  | -0.33093 |
| C | -3.00684 | 0.56525  | 0.16939  |
| C | -3.07897 | 0.16800  | 1.63840  |

|   |          |          |          |
|---|----------|----------|----------|
| C | -3.98201 | -0.23296 | -0.68628 |
| C | -3.26245 | 2.05694  | 0.01150  |
| O | -1.56137 | -1.82911 | 0.02973  |
| H | 3.22068  | 3.20250  | 0.10047  |
| H | 4.96637  | 1.41401  | -0.05802 |
| H | 4.11915  | 1.33007  | 1.46240  |
| H | 3.33806  | -0.36311 | -0.95500 |
| H | 4.47797  | -0.94886 | 0.24039  |
| H | 2.83443  | -0.94328 | 1.99378  |
| H | 1.71347  | 0.02444  | 1.06264  |
| H | 1.01463  | -2.34838 | 1.19572  |
| H | 2.48871  | -2.84833 | 0.37654  |
| H | 0.48919  | -2.72266 | -1.11844 |
| H | 1.79806  | -1.69285 | -1.67876 |
| H | 0.55283  | 0.22665  | -1.04974 |
| H | -4.06193 | 0.43023  | 2.03297  |
| H | -2.91969 | -0.89986 | 1.76452  |
| H | -2.32495 | 0.71319  | 2.20872  |
| H | -3.82654 | -1.30199 | -0.56543 |
| H | -5.00306 | 0.01350  | -0.39066 |
| H | -3.85651 | 0.03082  | -1.73755 |
| H | -2.53727 | 2.62827  | 0.59151  |
| H | -3.17445 | 2.34677  | -1.03576 |
| H | -4.26538 | 2.30187  | 0.36183  |

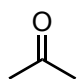

### Carbonyl 100

M06-2X/def2-TZVP Geometry

|   |          |          |          |
|---|----------|----------|----------|
| C | 0.00001  | 0.18642  | 0.00003  |
| O | -0.00032 | 1.39000  | -0.00002 |
| C | -1.28285 | -0.61082 | 0.00130  |
| C | 1.28314  | -0.61038 | -0.00136 |
| H | -1.35080 | -1.19601 | -0.91817 |
| H | -1.28706 | -1.31825 | 0.83250  |
| H | -2.13604 | 0.05802  | 0.07428  |
| H | 1.35101  | -1.19544 | 0.91829  |
| H | 1.28749  | -1.31817 | -0.83224 |
| H | 2.13617  | 0.05861  | -0.07432 |

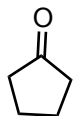

### Carbonyl 103

M06-2X/def2-TZVP Geometry

|   |          |          |          |
|---|----------|----------|----------|
| C | 0.91929  | -0.00000 | -0.00002 |
| C | 0.02848  | 1.23031  | -0.12722 |
| O | 2.11827  | -0.00000 | -0.00000 |
| C | 0.02847  | -1.23031 | 0.12725  |
| C | -1.36914 | -0.73104 | -0.23853 |
| C | -1.36914 | 0.73104  | 0.23852  |
| H | 0.41284  | 2.05067  | 0.47596  |
| H | 0.06987  | 1.54367  | -1.17517 |
| H | 0.41283  | -2.05070 | -0.47588 |
| H | 0.06985  | -1.54361 | 1.17522  |
| H | -1.50196 | -0.76088 | -1.32264 |
| H | -2.16767 | -1.32044 | 0.20843  |
| H | -1.50200 | 0.76087  | 1.32262  |
| H | -2.16767 | 1.32044  | -0.20846 |

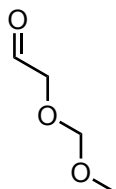

### Carbonyl 111

M06-2X/def2-TZVP Geometry

|   |          |          |          |
|---|----------|----------|----------|
| C | -1.48890 | -0.49948 | -0.26250 |
| C | -1.12198 | 0.96586  | -0.13067 |
| O | -2.41358 | -0.99012 | 0.31745  |
| O | 0.19721  | 1.24974  | -0.52765 |
| C | 1.14828  | 0.90425  | 0.43985  |
| O | 1.23147  | -0.46978 | 0.64420  |
| C | 1.90236  | -1.15148 | -0.39774 |
| H | -0.86873 | -1.07965 | -0.97221 |
| H | -1.31964 | 1.28593  | 0.89804  |
| H | -1.78235 | 1.52707  | -0.79662 |
| H | 0.88031  | 1.33889  | 1.40705  |
| H | 2.09836  | 1.31031  | 0.08149  |
| H | 1.44989  | -0.93798 | -1.36950 |
| H | 2.95756  | -0.86265 | -0.42599 |
| H | 1.82529  | -2.21558 | -0.18803 |

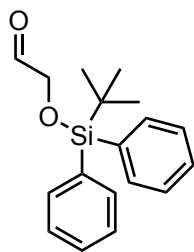

### Carbonyl 112

M06-2X/def2-TZVP Geometry

|    |          |          |          |
|----|----------|----------|----------|
| C  | 2.40999  | -1.47713 | -2.35094 |
| C  | 0.96812  | -1.03597 | -2.28769 |
| O  | 2.99333  | -2.02961 | -1.46443 |
| O  | 0.33928  | -1.42947 | -1.11537 |
| Si | -0.11280 | -0.44223 | 0.13879  |
| C  | 1.10564  | 0.98184  | 0.22985  |
| C  | -1.83175 | 0.20403  | -0.23579 |
| C  | -0.12760 | -1.55193 | 1.65644  |
| C  | -0.67779 | -0.79953 | 2.87181  |
| C  | 1.28916  | -2.05039 | 1.96521  |
| C  | -1.02996 | -2.75523 | 1.35166  |
| C  | -2.52429 | -0.27899 | -1.34880 |
| C  | -3.81173 | 0.15359  | -1.64131 |
| C  | -4.43452 | 1.08068  | -0.81890 |
| C  | -3.76752 | 1.57130  | 0.29644  |
| C  | -2.48185 | 1.13546  | 0.58206  |
| C  | 2.47663  | 0.71088  | 0.33998  |
| C  | 3.41064  | 1.73635  | 0.37919  |
| C  | 2.99396  | 3.05941  | 0.31084  |
| C  | 1.64314  | 3.35024  | 0.19019  |
| C  | 0.71168  | 2.32047  | 0.14475  |
| H  | 2.91212  | -1.24309 | -3.31149 |
| H  | 0.96441  | 0.05456  | -2.43731 |
| H  | 0.45782  | -1.46992 | -3.15740 |
| H  | -1.72468 | -0.52145 | 2.73466  |
| H  | -0.62070 | -1.44060 | 3.75744  |
| H  | -0.10357 | 0.10694  | 3.08370  |
| H  | 1.76053  | -2.50371 | 1.08971  |
| H  | 1.92795  | -1.23945 | 2.32046  |
| H  | 1.24511  | -2.80495 | 2.75744  |
| H  | -0.64404 | -3.33812 | 0.51365  |
| H  | -1.07611 | -3.41033 | 2.22766  |
| H  | -2.05024 | -2.44502 | 1.11242  |
| H  | -2.05123 | -1.01313 | -1.99145 |
| H  | -4.32920 | -0.23510 | -2.50923 |
| H  | -5.43783 | 1.41946  | -1.04353 |

|   |          |          |         |
|---|----------|----------|---------|
| H | -4.25068 | 2.29250  | 0.94335 |
| H | -1.97811 | 1.53059  | 1.45823 |
| H | 2.82242  | -0.31544 | 0.37844 |
| H | 4.46433  | 1.50208  | 0.46222 |
| H | 3.72145  | 3.86051  | 0.34464 |
| H | 1.31332  | 4.37934  | 0.12476 |
| H | -0.33640 | 2.56783  | 0.02705 |

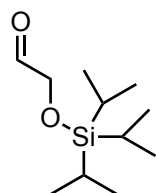

**Carbonyl 113**

M06-2X/def2-TZVP Geometry

|    |          |          |          |
|----|----------|----------|----------|
| C  | -3.40474 | -0.16913 | 0.70597  |
| C  | -2.22523 | -0.46441 | -0.19770 |
| O  | -4.53878 | -0.16800 | 0.32486  |
| O  | -1.04489 | -0.44652 | 0.55261  |
| Si | 0.44223  | 0.04905  | -0.00993 |
| C  | 0.23181  | 1.73827  | -0.81630 |
| C  | 1.54588  | 0.15247  | 1.51290  |
| C  | 1.09254  | -1.19944 | -1.26277 |
| C  | 1.59081  | 2.32104  | -1.21971 |
| C  | -0.52885 | 2.70944  | 0.09054  |
| C  | 3.01998  | -0.10262 | 1.17493  |
| C  | 1.08648  | -0.77122 | 2.64644  |
| C  | 0.38949  | -1.09364 | -2.62036 |
| C  | 0.98541  | -2.62560 | -0.71094 |
| H  | -3.13165 | 0.05081  | 1.75732  |
| H  | -2.39221 | -1.44323 | -0.66150 |
| H  | -2.23026 | 0.28322  | -1.00189 |
| H  | -0.35606 | 1.59621  | -1.73071 |
| H  | 1.46021  | 1.18541  | 1.87210  |
| H  | 2.15414  | -0.97163 | -1.41549 |
| H  | 1.46973  | 3.27049  | -1.74685 |
| H  | 2.20502  | 2.51659  | -0.33665 |
| H  | 2.15203  | 1.64781  | -1.87257 |
| H  | -0.66321 | 3.67737  | -0.39879 |
| H  | -1.51762 | 2.33242  | 0.35983  |
| H  | 0.01633  | 2.88857  | 1.02056  |
| H  | 3.65039  | 0.06512  | 2.05149  |
| H  | 3.17361  | -1.13652 | 0.85651  |
| H  | 3.38556  | 0.54403  | 0.37458  |
| H  | 0.05755  | -0.56834 | 2.94088  |



|   |          |          |          |
|---|----------|----------|----------|
| H | 1.13871  | -1.82040 | 2.34724  |
| H | 1.72772  | -0.64753 | 3.52295  |
| H | 0.77484  | -1.84396 | -3.31556 |
| H | -0.68637 | -1.26599 | -2.52785 |
| H | 0.52927  | -0.11379 | -3.07995 |
| H | 1.36843  | -3.35289 | -1.43128 |
| H | 1.54580  | -2.75092 | 0.21722  |
| H | -0.05522 | -2.88448 | -0.50023 |

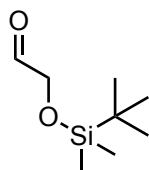

### Carbonyl 114

#### M06-2X/def2-TZVP Geometry

|    |          |          |          |
|----|----------|----------|----------|
| C  | 3.02486  | -0.51888 | -0.10476 |
| C  | 2.30211  | 0.57886  | -0.84935 |
| O  | 2.48782  | -1.46113 | 0.40033  |
| O  | 0.94378  | 0.35475  | -0.98252 |
| Si | -0.21976 | 0.66214  | 0.16970  |
| C  | -1.57505 | -0.60357 | -0.13220 |
| C  | -0.83047 | 2.41009  | -0.09757 |
| C  | 0.49744  | 0.53650  | 1.89113  |
| C  | -0.98349 | -2.01467 | -0.04373 |
| C  | -2.17300 | -0.39428 | -1.52797 |
| C  | -2.67496 | -0.44348 | 0.92267  |
| H  | 4.12526  | -0.38813 | -0.05401 |
| H  | 2.54032  | 1.52393  | -0.33486 |
| H  | 2.76374  | 0.65316  | -1.84158 |
| H  | -0.02754 | 3.12797  | 0.08678  |
| H  | -1.17819 | 2.55533  | -1.12138 |
| H  | -1.65034 | 2.65597  | 0.58037  |
| H  | 0.75897  | -0.48924 | 2.14994  |
| H  | 1.39883  | 1.14689  | 1.99240  |
| H  | -0.22425 | 0.90993  | 2.62105  |
| H  | -0.55625 | -2.21616 | 0.94086  |
| H  | -1.76748 | -2.75718 | -0.22670 |
| H  | -0.19191 | -2.16116 | -0.77969 |
| H  | -2.65705 | 0.58088  | -1.61910 |
| H  | -2.93100 | -1.15894 | -1.72747 |
| H  | -1.40910 | -0.46981 | -2.30479 |
| H  | -3.47357 | -1.17055 | 0.74278  |
| H  | -2.29486 | -0.61699 | 1.93233  |
| H  | -3.12636 | 0.55168  | 0.89541  |

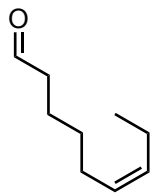

**Carbonyl 116**

M06-2X/def2-TZVP Geometry

|   |          |          |          |
|---|----------|----------|----------|
| O | 3.24593  | 0.38031  | -1.16072 |
| C | 3.36482  | 0.59465  | 0.01377  |
| C | 2.22775  | 0.62024  | 0.99929  |
| C | 0.88368  | 0.21998  | 0.41192  |
| C | 0.79077  | -1.27334 | 0.11700  |
| C | -0.54507 | -1.66083 | -0.52828 |
| C | -1.70886 | -1.44904 | 0.39474  |
| C | -2.62920 | -0.49183 | 0.33360  |
| C | -2.72999 | 0.61955  | -0.66784 |
| C | -2.70898 | 1.98991  | 0.01088  |
| H | 4.36493  | 0.81037  | 0.44040  |
| H | 2.20678  | 1.63708  | 1.40892  |
| H | 2.50780  | -0.02196 | 1.84238  |
| H | 0.08722  | 0.50227  | 1.10331  |
| H | 0.72038  | 0.77979  | -0.51352 |
| H | 1.60534  | -1.56191 | -0.54986 |
| H | 0.92009  | -1.83454 | 1.04893  |
| H | -0.66741 | -1.09792 | -1.45461 |
| H | -0.50718 | -2.71674 | -0.80792 |
| H | -1.77612 | -2.15810 | 1.21648  |
| H | -3.39931 | -0.48281 | 1.10182  |
| H | -1.92300 | 0.56049  | -1.39794 |
| H | -3.66651 | 0.51475  | -1.22427 |
| H | -2.83141 | 2.79231  | -0.71697 |
| H | -3.51382 | 2.07287  | 0.74335  |
| H | -1.76482 | 2.14583  | 0.53478  |

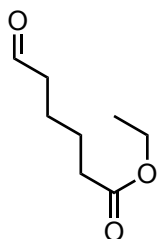

**Carbonyl 117**

M06-2X/def2-TZVP Geometry

|   |          |         |          |
|---|----------|---------|----------|
| O | -0.59991 | 1.59932 | -0.99818 |
|---|----------|---------|----------|

|   |          |          |          |
|---|----------|----------|----------|
| C | -1.15187 | 1.75819  | 0.05824  |
| C | -2.34053 | 0.97451  | 0.53567  |
| C | -2.73177 | -0.21387 | -0.33616 |
| C | -1.92786 | -1.49660 | -0.10504 |
| C | -0.48980 | -1.47483 | -0.61045 |
| C | 0.46807  | -0.74712 | 0.29580  |
| O | 1.64884  | -0.55942 | -0.29439 |
| O | 0.22726  | -0.38124 | 1.41872  |
| C | 2.61527  | 0.18785  | 0.45442  |
| C | 3.84935  | 0.31976  | -0.40362 |
| H | -0.80321 | 2.54676  | 0.75299  |
| H | -3.16126 | 1.70036  | 0.59224  |
| H | -2.13612 | 0.67115  | 1.56608  |
| H | -3.78185 | -0.44089 | -0.14340 |
| H | -2.65924 | 0.07737  | -1.38720 |
| H | -1.92791 | -1.74200 | 0.95974  |
| H | -2.44648 | -2.30941 | -0.61687 |
| H | -0.10344 | -2.49342 | -0.70734 |
| H | -0.41706 | -1.01727 | -1.59830 |
| H | 2.18285  | 1.15957  | 0.69888  |
| H | 2.81762  | -0.33388 | 1.39079  |
| H | 4.61127  | 0.88875  | 0.12908  |
| H | 4.25629  | -0.66149 | -0.64638 |
| H | 3.61390  | 0.83776  | -1.33259 |

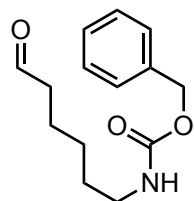

**Carbonyl 118**

M06-2X/def2-TZVP Geometry

|   |          |          |          |
|---|----------|----------|----------|
| O | 0.34664  | 3.11827  | -0.57447 |
| C | 1.24668  | 2.38679  | -0.89114 |
| C | 2.63459  | 2.44356  | -0.31576 |
| C | 3.15306  | 1.04596  | 0.02056  |
| C | 2.38706  | 0.40177  | 1.17193  |
| C | 2.91417  | -0.98413 | 1.53616  |
| C | 2.65296  | -2.04991 | 0.47366  |
| N | 1.24828  | -2.37043 | 0.31213  |
| C | 0.46053  | -1.77109 | -0.60557 |
| O | -0.77641 | -2.30478 | -0.57855 |
| O | 0.81439  | -0.89138 | -1.36086 |
| C | -1.79051 | -1.60331 | -1.31699 |

|   |          |          |          |
|---|----------|----------|----------|
| C | -2.40210 | -0.52063 | -0.47349 |
| C | -1.92216 | 0.78311  | -0.53921 |
| C | -2.45090 | 1.77021  | 0.28145  |
| C | -3.47068 | 1.45754  | 1.16944  |
| C | -3.96011 | 0.15884  | 1.23731  |
| C | -3.42530 | -0.82530 | 0.42012  |
| H | 1.09199  | 1.59787  | -1.65337 |
| H | 2.63040  | 3.10623  | 0.55101  |
| H | 3.27153  | 2.89535  | -1.08433 |
| H | 4.21402  | 1.10620  | 0.27650  |
| H | 3.07029  | 0.42219  | -0.87296 |
| H | 2.45481  | 1.05033  | 2.04976  |
| H | 1.32332  | 0.33787  | 0.91923  |
| H | 3.99407  | -0.92873 | 1.70652  |
| H | 2.46429  | -1.31609 | 2.47550  |
| H | 3.02553  | -1.73038 | -0.49924 |
| H | 3.17606  | -2.97044 | 0.73606  |
| H | 0.81155  | -3.04914 | 0.91228  |
| H | -1.35185 | -1.20030 | -2.22786 |
| H | -2.52379 | -2.36722 | -1.56834 |
| H | -1.12824 | 1.02713  | -1.23321 |
| H | -2.05361 | 2.77444  | 0.22085  |
| H | -3.88722 | 2.22604  | 1.80800  |
| H | -4.75872 | -0.08536 | 1.92604  |
| H | -3.80307 | -1.84016 | 0.47290  |

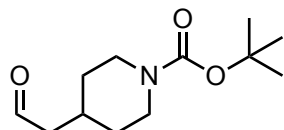

**Carbonyl 119**

M06-2X/def2-TZVP Geometry

|   |          |          |          |
|---|----------|----------|----------|
| O | -4.87525 | -1.46423 | -0.60447 |
| C | -4.93982 | -0.86248 | 0.43154  |
| C | -3.95512 | 0.18468  | 0.87667  |
| C | -2.75214 | 0.35892  | -0.03700 |
| C | -1.81468 | -0.84809 | 0.02819  |
| C | -0.58719 | -0.64324 | -0.85357 |
| N | 0.08263  | 0.60052  | -0.51075 |
| C | -0.75017 | 1.78753  | -0.58353 |
| C | -1.97874 | 1.63235  | 0.30507  |
| C | 1.39484  | 0.72201  | -0.17445 |
| O | 2.01783  | -0.47070 | -0.17768 |
| O | 1.92999  | 1.77539  | 0.09721  |
| C | 3.42714  | -0.56749 | 0.16425  |
| C | 3.70199  | -2.05840 | 0.03202  |

|   |          |          |          |
|---|----------|----------|----------|
| C | 3.65930  | -0.11156 | 1.59866  |
| C | 4.27272  | 0.21637  | -0.83071 |
| H | -5.77862 | -1.04899 | 1.13123  |
| H | -4.52373 | 1.11929  | 0.96657  |
| H | -3.64458 | -0.05995 | 1.89978  |
| H | -3.11996 | 0.44097  | -1.06648 |
| H | -1.48440 | -0.99064 | 1.06304  |
| H | -2.34124 | -1.74984 | -0.28656 |
| H | -0.90040 | -0.59493 | -1.90398 |
| H | 0.11157  | -1.46578 | -0.74914 |
| H | -0.14694 | 2.64155  | -0.28990 |
| H | -1.06902 | 1.93155  | -1.62356 |
| H | -2.62155 | 2.50885  | 0.19059  |
| H | -1.65742 | 1.59517  | 1.35133  |
| H | 3.49876  | -2.39266 | -0.98577 |
| H | 4.74597  | -2.26628 | 0.26683  |
| H | 3.06978  | -2.62327 | 0.71778  |
| H | 3.49011  | 0.95679  | 1.70401  |
| H | 2.99134  | -0.64936 | 2.27356  |
| H | 4.68777  | -0.33883 | 1.88344  |
| H | 4.10628  | 1.28574  | -0.73215 |
| H | 5.32703  | 0.00172  | -0.64938 |
| H | 4.03152  | -0.09195 | -1.84926 |

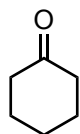

### Carbonyl 120

M06-2X/def2-TZVP Geometry

|   |          |          |          |
|---|----------|----------|----------|
| C | 1.77283  | 0.00000  | 0.09255  |
| C | 0.99615  | 1.25711  | -0.28941 |
| C | -0.38826 | 1.27697  | 0.37094  |
| C | -1.14600 | -0.00000 | 0.07649  |
| C | -0.38826 | -1.27697 | 0.37094  |
| C | 0.99616  | -1.25711 | -0.28941 |
| O | -2.26250 | -0.00000 | -0.37572 |
| H | 2.74971  | 0.00000  | -0.39397 |
| H | 1.95514  | 0.00000  | 1.17262  |
| H | 1.54943  | 2.15406  | -0.00760 |
| H | 0.87384  | 1.28829  | -1.37621 |
| H | -0.26261 | 1.34330  | 1.45744  |
| H | -0.99094 | 2.12249  | 0.04363  |
| H | -0.26262 | -1.34330 | 1.45744  |
| H | -0.99094 | -2.12249 | 0.04362  |
| H | 0.87384  | -1.28830 | -1.37621 |
| H | 1.54944  | -2.15405 | -0.00759 |

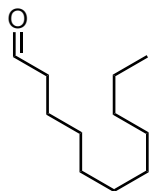

**Carbonyl 125**

M06-2X/def2-TZVP Geometry

|   |          |          |          |
|---|----------|----------|----------|
| O | 4.72726  | 1.61434  | -0.56446 |
| C | 5.28702  | 0.82013  | 0.13914  |
| C | 4.84997  | -0.60637 | 0.33740  |
| C | 3.52943  | -0.95138 | -0.33320 |
| C | 2.32647  | -0.33397 | 0.37204  |
| C | 1.00860  | -0.66210 | -0.31749 |
| C | -0.20154 | -0.06425 | 0.38885  |
| C | -1.52018 | -0.38513 | -0.30338 |
| C | -2.73093 | 0.21121  | 0.40343  |
| C | -4.04960 | -0.10798 | -0.28913 |
| C | -5.26125 | 0.48727  | 0.41771  |
| C | -6.57175 | 0.15996  | -0.28637 |
| H | 6.20544  | 1.11302  | 0.68638  |
| H | 5.67215  | -1.22757 | -0.03723 |
| H | 4.81729  | -0.79419 | 1.41680  |
| H | 3.55812  | -0.60433 | -1.36886 |
| H | 3.41440  | -2.03771 | -0.36233 |
| H | 2.29212  | -0.69183 | 1.40722  |
| H | 2.45162  | 0.75101  | 0.41587  |
| H | 1.04271  | -0.29648 | -1.34901 |
| H | 0.89074  | -1.74953 | -0.38053 |
| H | -0.23628 | -0.42997 | 1.42084  |
| H | -0.08117 | 1.02228  | 0.45331  |
| H | -1.48583 | -0.01764 | -1.33454 |
| H | -1.63929 | -1.47195 | -0.37040 |
| H | -2.76552 | -0.15654 | 1.43466  |
| H | -2.61131 | 1.29785  | 0.47092  |
| H | -4.01624 | 0.26053  | -1.32021 |
| H | -4.16976 | -1.19472 | -0.35785 |
| H | -5.29325 | 0.11807  | 1.44705  |
| H | -5.13975 | 1.57237  | 0.48536  |
| H | -7.42709 | 0.59311  | 0.23287  |
| H | -6.57026 | 0.54472  | -1.30809 |
| H | -6.72437 | -0.91973 | -0.34065 |

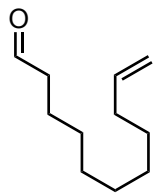

**Carbonyl 126**

M06-2X/def2-TZVP Geometry

|   |          |          |          |
|---|----------|----------|----------|
| O | -4.30411 | 1.27771  | 1.19195  |
| C | -4.93492 | 0.41900  | 0.64075  |
| C | -4.49319 | -0.30413 | -0.60311 |
| C | -3.08430 | 0.04331  | -1.05797 |
| C | -2.00612 | -0.54674 | -0.15518 |
| C | -0.59793 | -0.18014 | -0.60513 |
| C | 0.48782  | -0.77239 | 0.28440  |
| C | 1.89634  | -0.40427 | -0.16414 |
| C | 2.97849  | -0.99488 | 0.73062  |
| C | 4.39853  | -0.65462 | 0.26716  |
| C | 4.69266  | 0.81213  | 0.34010  |
| C | 5.03517  | 1.57419  | -0.68753 |
| H | -5.92711 | 0.11924  | 1.03394  |
| H | -4.60543 | -1.37853 | -0.41733 |
| H | -5.23948 | -0.06607 | -1.37028 |
| H | -2.93813 | -0.31573 | -2.07971 |
| H | -2.97916 | 1.13060  | -1.08245 |
| H | -2.16181 | -0.19682 | 0.86856  |
| H | -2.10776 | -1.63773 | -0.13693 |
| H | -0.44521 | -0.51703 | -1.63640 |
| H | -0.49790 | 0.91000  | -0.62022 |
| H | 0.33499  | -0.43206 | 1.31407  |
| H | 0.38523  | -1.86292 | 0.30441  |
| H | 2.05323  | -0.74910 | -1.19252 |
| H | 1.99844  | 0.68462  | -0.19068 |
| H | 2.83815  | -0.63608 | 1.75574  |
| H | 2.86630  | -2.08213 | 0.76622  |
| H | 5.11371  | -1.19245 | 0.89682  |
| H | 4.54651  | -1.00526 | -0.75794 |
| H | 5.23146  | 2.63207  | -0.57091 |
| H | 5.13344  | 1.16018  | -1.68501 |
| H | 4.59805  | 1.26483  | 1.32517  |

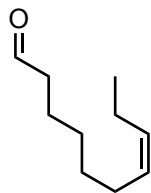

**Carbonyl 127**

M06-2X/def2-TZVP Geometry

|   |          |          |          |
|---|----------|----------|----------|
| O | -3.69176 | -0.90164 | -0.91398 |
| C | -4.06738 | 0.12844  | -0.42708 |
| C | -3.15968 | 1.22296  | 0.06687  |
| C | -1.68193 | 0.86500  | 0.03155  |
| C | -1.29827 | -0.15061 | 1.10460  |
| C | 0.19593  | -0.45554 | 1.14665  |
| C | 0.73248  | -1.09457 | -0.13949 |
| C | 2.16235  | -1.52639 | 0.01551  |
| C | 3.23972  | -0.80994 | -0.28811 |
| C | 3.27064  | 0.58029  | -0.84877 |
| C | 4.01634  | 1.54046  | 0.07968  |
| H | -5.15216 | 0.33527  | -0.33221 |
| H | -3.38087 | 2.09970  | -0.55325 |
| H | -3.48812 | 1.49447  | 1.07662  |
| H | -1.44792 | 0.46773  | -0.95779 |
| H | -1.08722 | 1.77311  | 0.16452  |
| H | -1.61032 | 0.23360  | 2.08098  |
| H | -1.85332 | -1.07695 | 0.93537  |
| H | 0.75990  | 0.46304  | 1.34185  |
| H | 0.40432  | -1.12533 | 1.98525  |
| H | 0.11248  | -1.96047 | -0.38833 |
| H | 0.63355  | -0.39601 | -0.97060 |
| H | 3.77174  | 0.56622  | -1.82151 |
| H | 2.25916  | 0.95020  | -1.02073 |
| H | 3.51731  | 1.60327  | 1.04774  |
| H | 5.03706  | 1.19626  | 0.25474  |
| H | 4.21545  | -1.24749 | -0.09051 |
| H | 2.31440  | -2.50684 | 0.45777  |
| H | 4.06733  | 2.54279  | -0.34651 |



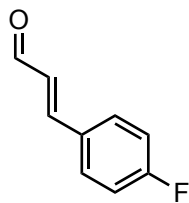

**Carbonyl 128**

M06-2X/def2-TZVP Geometry

|   |          |          |          |
|---|----------|----------|----------|
| C | 2.10299  | 1.22489  | 0.00001  |
| C | 0.71893  | 1.28530  | 0.00001  |
| C | -0.06000 | 0.12638  | 0.00000  |
| C | 0.59018  | -1.11225 | -0.00001 |
| C | 1.96921  | -1.19283 | -0.00001 |
| C | 2.70281  | -0.01818 | 0.00001  |
| F | 4.03811  | -0.09437 | -0.00000 |
| C | -1.51441 | 0.25823  | 0.00002  |
| C | -2.42275 | -0.72144 | -0.00004 |
| C | -3.86436 | -0.40118 | 0.00007  |
| O | -4.31512 | 0.71609  | -0.00008 |
| H | 2.71565  | 2.11562  | 0.00001  |
| H | 0.22767  | 2.25048  | 0.00001  |
| H | 0.01247  | -2.02687 | -0.00003 |
| H | 2.48612  | -2.14249 | -0.00003 |
| H | -1.90206 | 1.27382  | 0.00013  |
| H | -2.15333 | -1.77051 | -0.00012 |
| H | -4.54429 | -1.27289 | 0.00033  |

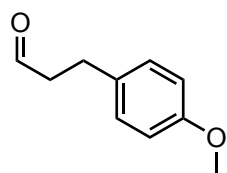

**Carbonyl 129**

M06-2X/def2-TZVP Geometry

|   |          |          |          |
|---|----------|----------|----------|
| H | 4.75273  | -0.09627 | 1.60414  |
| C | 4.19700  | -0.11858 | 0.64535  |
| C | 2.70242  | -0.01966 | 0.76380  |
| C | 1.97747  | -0.05072 | -0.57740 |
| C | 0.48598  | 0.05494  | -0.40562 |
| O | 4.78865  | -0.21659 | -0.39362 |
| C | -0.13220 | 1.29899  | -0.26320 |
| C | -1.49305 | 1.40692  | -0.06061 |
| C | -2.28251 | 0.25892  | 0.00635  |
| C | -1.68907 | -0.98949 | -0.13432 |
| C | -0.31445 | -1.07475 | -0.33777 |

|   |          |          |          |
|---|----------|----------|----------|
| O | -3.61042 | 0.46014  | 0.20467  |
| C | -4.44165 | -0.67521 | 0.26886  |
| H | 2.36578  | -0.83530 | 1.41407  |
| H | 2.47329  | 0.89805  | 1.31773  |
| H | 2.34876  | 0.76642  | -1.19841 |
| H | 2.23598  | -0.97336 | -1.09904 |
| H | 0.46804  | 2.20056  | -0.32054 |
| H | -1.97467 | 2.37019  | 0.04306  |
| H | -2.27642 | -1.89521 | -0.09392 |
| H | 0.13743  | -2.05380 | -0.45236 |
| H | -5.45097 | -0.30552 | 0.42832  |
| H | -4.15855 | -1.32733 | 1.09984  |
| H | -4.40686 | -1.24489 | -0.66393 |

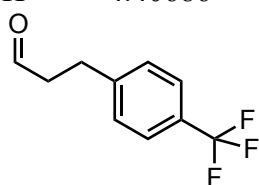

### Carbonyl 130

M06-2X/def2-TZVP Geometry

|   |          |          |          |
|---|----------|----------|----------|
| H | -4.30790 | 0.88809  | 1.87240  |
| C | -3.83974 | 0.73351  | 0.88107  |
| C | -3.60214 | -0.70245 | 0.49597  |
| C | -2.78475 | -0.86725 | -0.78425 |
| C | -1.32153 | -0.57605 | -0.56674 |
| O | -3.57861 | 1.67311  | 0.18273  |
| C | -0.48968 | -1.56011 | -0.03104 |
| C | 0.85000  | -1.30950 | 0.20147  |
| C | 1.37608  | -0.05974 | -0.10348 |
| C | 0.56654  | 0.92882  | -0.63689 |
| C | -0.77821 | 0.66822  | -0.86520 |
| C | 2.83496  | 0.18286  | 0.15180  |
| H | -4.59366 | -1.15894 | 0.39417  |
| H | -3.12913 | -1.20869 | 1.34331  |
| H | -2.89739 | -1.89081 | -1.14465 |
| H | -3.18630 | -0.20083 | -1.54788 |
| H | -0.89880 | -2.53770 | 0.19812  |
| H | 1.49069  | -2.07931 | 0.61305  |
| H | 0.98158  | 1.89911  | -0.87213 |
| H | -1.41863 | 1.44218  | -1.26732 |
| F | 3.20693  | 1.43026  | -0.14762 |
| F | 3.60794  | -0.64365 | -0.56858 |
| F | 3.15394  | -0.02747 | 1.43763  |

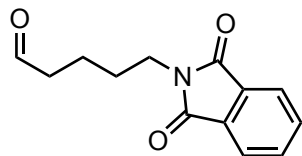

### Carbonyl 131

#### M06-2X/def2-TZVP Geometry

|   |          |          |          |
|---|----------|----------|----------|
| C | -5.78168 | 0.00027  | 0.72673  |
| C | -4.31838 | 0.00010  | 1.07131  |
| C | -3.40385 | 0.00011  | -0.14043 |
| C | -1.93229 | 0.00002  | 0.24868  |
| O | -6.21251 | -0.00034 | -0.39240 |
| C | -1.02942 | 0.00010  | -0.97810 |
| N | 0.37499  | 0.00006  | -0.62217 |
| C | 1.11829  | 1.15719  | -0.39991 |
| C | 2.48776  | 0.69270  | -0.02413 |
| C | 2.48771  | -0.69274 | -0.02414 |
| C | 1.11821  | -1.15713 | -0.39991 |
| C | 3.61818  | 1.41684  | 0.28754  |
| C | 4.76810  | 0.69609  | 0.60421  |
| C | 4.76805  | -0.69628 | 0.60420  |
| C | 3.61809  | -1.41695 | 0.28751  |
| O | 0.70143  | -2.27897 | -0.50008 |
| O | 0.70159  | 2.27906  | -0.50006 |
| H | -6.47368 | -0.00052 | 1.59208  |
| H | -4.13597 | 0.87065  | 1.71262  |
| H | -4.13613 | -0.87060 | 1.71246  |
| H | -3.62944 | -0.87243 | -0.75837 |
| H | -3.62935 | 0.87274  | -0.75828 |
| H | -1.70166 | 0.88153  | 0.85373  |
| H | -1.70172 | -0.88163 | 0.85356  |
| H | -1.20962 | -0.88739 | -1.58577 |
| H | -1.20958 | 0.88770  | -1.58562 |
| H | 3.60492  | 2.49870  | 0.28383  |
| H | 5.67801  | 1.22531  | 0.85500  |
| H | 5.67793  | -1.22556 | 0.85498  |
| H | 3.60475  | -2.49881 | 0.28379  |

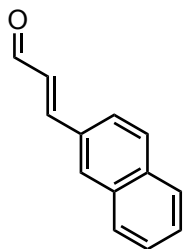

### Carbonyl 132

M06-2X/def2-TZVP Geometry

|   |          |          |          |
|---|----------|----------|----------|
| C | -4.64302 | -0.47775 | -0.00001 |
| C | -3.33177 | 0.17909  | -0.00002 |
| C | -2.21636 | -0.55737 | 0.00002  |
| O | -5.69512 | 0.10722  | -0.00002 |
| C | -0.83574 | -0.08221 | 0.00002  |
| C | -0.51270 | 1.30340  | 0.00002  |
| C | 0.78441  | 1.71487  | 0.00001  |
| C | 1.85098  | 0.77840  | 0.00000  |
| C | 1.54227  | -0.60501 | 0.00000  |
| C | 0.18562  | -1.00127 | 0.00001  |
| C | 3.20617  | 1.17907  | -0.00001 |
| C | 4.20763  | 0.24782  | -0.00001 |
| C | 3.90101  | -1.13026 | -0.00001 |
| C | 2.59945  | -1.54634 | -0.00001 |
| H | -4.60988 | -1.58596 | 0.00005  |
| H | -3.33551 | 1.26203  | -0.00006 |
| H | -2.33200 | -1.63947 | 0.00006  |
| H | -1.30734 | 2.03711  | 0.00003  |
| H | 1.02222  | 2.77185  | 0.00001  |
| H | -0.04603 | -2.06102 | 0.00001  |
| H | 3.43775  | 2.23739  | -0.00001 |
| H | 5.24250  | 0.56418  | -0.00002 |
| H | 4.70362  | -1.85598 | -0.00002 |
| H | 2.35776  | -2.60246 | -0.00000 |

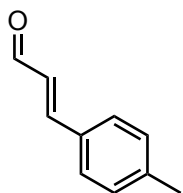

### Carbonyl 133

M06-2X/def2-TZVP Geometry

|   |         |          |          |
|---|---------|----------|----------|
| C | 3.86085 | 0.19364  | -0.00011 |
| C | 2.47454 | -0.28225 | 0.00009  |

|   |          |          |          |
|---|----------|----------|----------|
| C | 1.46721  | 0.59613  | -0.00022 |
| O | 4.82658  | -0.52549 | 0.00015  |
| C | 0.03405  | 0.31267  | -0.00011 |
| C | -0.86714 | 1.37550  | 0.00007  |
| C | -2.23607 | 1.15290  | 0.00025  |
| C | -2.74697 | -0.13904 | 0.00020  |
| C | -1.84339 | -1.20511 | 0.00007  |
| C | -0.48079 | -0.98853 | -0.00009 |
| C | -4.22637 | -0.39901 | -0.00015 |
| H | 3.97518  | 1.29643  | -0.00050 |
| H | 2.33294  | -1.35610 | 0.00051  |
| H | 1.72847  | 1.65277  | -0.00058 |
| H | -0.48777 | 2.39067  | 0.00012  |
| H | -2.91645 | 1.99585  | 0.00045  |
| H | 0.19178  | -1.83633 | -0.00020 |
| H | -4.79198 | 0.53121  | 0.00468  |
| H | -2.22360 | -2.22018 | 0.00013  |
| H | -4.51786 | -0.98028 | 0.87631  |
| H | -4.51879 | -0.97151 | -0.88210 |

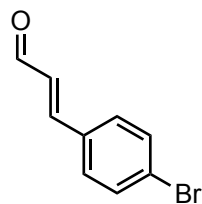

**Carbonyl 134**

M06-2X/def2-TZVP Geometry

|    |          |          |          |
|----|----------|----------|----------|
| C  | -5.03199 | 0.09604  | 0.00053  |
| C  | -3.62364 | -0.31764 | 0.00034  |
| C  | -2.65647 | 0.60326  | 0.00024  |
| O  | -5.96093 | -0.66823 | -0.00082 |
| C  | -1.21176 | 0.37818  | 0.00018  |
| C  | -0.35537 | 1.47979  | 0.00002  |
| C  | 1.02143  | 1.32322  | -0.00007 |
| C  | 1.55003  | 0.04304  | 0.00001  |
| C  | 0.72334  | -1.07363 | 0.00018  |
| C  | -0.64779 | -0.90080 | 0.00026  |
| Br | 3.42588  | -0.19200 | -0.00010 |
| H  | -5.19671 | 1.19251  | -0.00093 |
| H  | -3.43682 | -1.38472 | 0.00035  |
| H  | -2.96123 | 1.64792  | 0.00023  |
| H  | -0.77555 | 2.47848  | -0.00005 |
| H  | 1.67649  | 2.18297  | -0.00020 |
| H  | -1.28498 | -1.77525 | 0.00039  |

|   |         |          |         |
|---|---------|----------|---------|
| H | 1.15393 | -2.06509 | 0.00025 |
|---|---------|----------|---------|

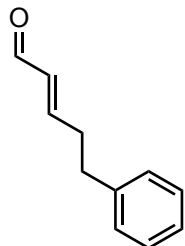

### Carbonyl 135

M06-2X/def2-TZVP Geometry

|   |          |          |          |
|---|----------|----------|----------|
| C | 4.59931  | -0.10743 | 0.08039  |
| C | 3.23505  | 0.24500  | -0.33777 |
| C | 2.22090  | -0.58662 | -0.11177 |
| O | 5.56278  | 0.59262  | -0.08825 |
| C | 0.79447  | -0.33568 | -0.46654 |
| C | -0.10868 | -0.32213 | 0.77910  |
| H | 4.69342  | -1.09262 | 0.58028  |
| H | 3.10330  | 1.20133  | -0.83233 |
| H | 2.43342  | -1.52832 | 0.39379  |
| H | 0.23048  | 0.46605  | 1.45422  |
| H | 0.44182  | -1.12486 | -1.13804 |
| H | 0.69747  | 0.61085  | -1.00147 |
| H | 0.00028  | -1.27056 | 1.31090  |
| C | -4.20601 | 0.31056  | -0.36333 |
| C | -3.39661 | 1.39078  | -0.04083 |
| C | -2.07936 | 1.18285  | 0.34313  |
| C | -1.55150 | -0.10314 | 0.41189  |
| C | -2.37264 | -1.17900 | 0.08572  |
| C | -3.69027 | -0.97658 | -0.29865 |
| H | -5.23435 | 0.47036  | -0.65977 |
| H | -3.79245 | 2.39728  | -0.08436 |
| H | -1.45162 | 2.02929  | 0.59859  |
| H | -1.97544 | -2.18674 | 0.13968  |
| H | -4.31654 | -1.82478 | -0.54361 |

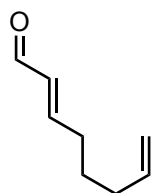

### Carbonyl 136

M06-2X/def2-TZVP Geometry

|   |         |          |         |
|---|---------|----------|---------|
| C | 3.56282 | -0.06559 | 0.31891 |
|---|---------|----------|---------|

|   |          |          |          |
|---|----------|----------|----------|
| C | 2.24634  | -0.24634 | -0.30709 |
| C | 1.13175  | -0.10439 | 0.40688  |
| O | 4.61193  | -0.17561 | -0.25979 |
| C | -0.25985 | -0.24178 | -0.10862 |
| C | -1.05934 | 1.05346  | 0.05671  |
| H | 3.53395  | 0.18896  | 1.39776  |
| H | 2.23275  | -0.49792 | -1.36207 |
| H | 1.23004  | 0.15263  | 1.46141  |
| H | -0.56406 | 1.85466  | -0.49587 |
| H | -0.76958 | -1.04095 | 0.43903  |
| H | -0.24172 | -0.53483 | -1.16103 |
| H | -1.05740 | 1.35025  | 1.11018  |
| C | -2.50514 | 0.91346  | -0.42989 |
| C | -3.29678 | -0.05411 | 0.39475  |
| C | -3.85095 | -1.16730 | -0.06114 |
| H | -3.39809 | 0.19433  | 1.44925  |
| H | -4.40912 | -1.83100 | 0.58618  |
| H | -2.51323 | 0.59657  | -1.47609 |
| H | -2.98276 | 1.89636  | -0.38815 |
| H | -3.76928 | -1.44863 | -1.10528 |

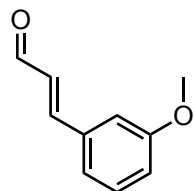

**Carbonyl 137**

M06-2X/def2-TZVP Geometry

|   |          |          |          |
|---|----------|----------|----------|
| C | 3.86706  | 0.11215  | 0.00002  |
| C | 2.40904  | 0.26924  | -0.00002 |
| C | 1.61958  | -0.80847 | 0.00004  |
| O | 4.64757  | 1.02867  | -0.00004 |
| C | 0.15701  | -0.84808 | 0.00002  |
| C | -0.47564 | -2.08602 | 0.00000  |
| C | -1.86463 | -2.15987 | -0.00002 |
| C | -2.62425 | -1.00951 | -0.00003 |
| C | -1.99599 | 0.24055  | -0.00001 |
| C | -0.61295 | 0.32266  | 0.00002  |
| O | -2.82338 | 1.31168  | -0.00001 |
| H | 4.22374  | -0.93747 | 0.00008  |
| H | 2.03637  | 1.28630  | -0.00009 |
| H | 2.10489  | -1.78234 | 0.00010  |
| H | 0.11950  | -2.99022 | 0.00001  |
| H | -2.35467 | -3.12457 | -0.00004 |

|   |          |          |          |
|---|----------|----------|----------|
| H | -0.12089 | 1.28356  | 0.00004  |
| H | -3.70550 | -1.04099 | -0.00004 |
| C | -2.24132 | 2.59650  | 0.00002  |
| H | -1.62897 | 2.75243  | -0.89210 |
| H | -3.06639 | 3.30311  | 0.00001  |
| H | -1.62899 | 2.75241  | 0.89216  |

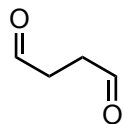

### Dialdehyde

M06-2X/def2-TZVP Geometry

|   |          |          |          |
|---|----------|----------|----------|
| C | -0.36826 | 0.66100  | 0.00021  |
| C | 0.36826  | -0.66100 | 0.00024  |
| C | -1.86133 | 0.50143  | 0.00034  |
| C | 1.86133  | -0.50143 | 0.00016  |
| O | 2.42707  | 0.55705  | -0.00034 |
| O | -2.42708 | -0.55705 | -0.00039 |
| H | -0.09041 | 1.27029  | -0.86556 |
| H | -0.09030 | 1.27039  | 0.86587  |
| H | 0.09031  | -1.27039 | -0.86542 |
| H | 0.09041  | -1.27029 | 0.86601  |
| H | -2.43922 | 1.44555  | -0.00056 |
| H | 2.43922  | -1.44555 | -0.00023 |

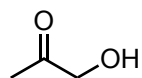

### Ketone OH

M06-2X/def2-TZVP Geometry

|   |          |          |          |
|---|----------|----------|----------|
| C | -1.83748 | -0.46026 | 0.01846  |
| C | -0.47067 | 0.16322  | -0.01714 |
| C | 0.72115  | -0.77081 | -0.03638 |
| O | 1.92488  | -0.07689 | 0.04071  |
| O | -0.29239 | 1.35577  | -0.01501 |
| H | -2.06613 | -0.72967 | 1.05221  |
| H | -2.58048 | 0.25227  | -0.33016 |
| H | -1.87174 | -1.37334 | -0.57589 |
| H | 0.62081  | -1.47565 | 0.79831  |
| H | 0.66194  | -1.36229 | -0.96007 |
| H | 1.69766  | 0.86472  | 0.02040  |



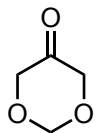

### Dihydroxyacetone 1

M06-2X/def2-TZVP Geometry

|   |          |          |          |
|---|----------|----------|----------|
| C | -0.29936 | 1.28948  | 0.11673  |
| C | -1.09329 | 0.00000  | 0.00209  |
| C | -0.29936 | -1.28948 | 0.11673  |
| O | -2.29110 | -0.00000 | -0.07789 |
| O | 1.04339  | 1.15445  | -0.29445 |
| C | 1.63372  | 0.00000  | 0.22175  |
| O | 1.04339  | -1.15445 | -0.29445 |
| H | -0.77255 | 2.05810  | -0.49060 |
| H | -0.35096 | 1.60038  | 1.17130  |
| H | -0.35096 | -1.60038 | 1.17130  |
| H | -0.77255 | -2.05810 | -0.49060 |
| H | 2.67324  | 0.00000  | -0.09305 |
| H | 1.55819  | 0.00000  | 1.32216  |

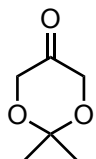

### Dihydroxyacetone 2

M06-2X/def2-TZVP Geometry

|   |          |          |          |
|---|----------|----------|----------|
| C | 0.88758  | 1.22470  | 0.25630  |
| C | 1.74747  | 0.00000  | -0.00001 |
| C | 0.88758  | -1.22470 | -0.25629 |
| O | 2.94595  | -0.00000 | -0.00000 |
| O | -0.32458 | 0.80204  | 0.84264  |
| C | -1.13902 | -0.00000 | -0.00000 |
| O | -0.32458 | -0.80204 | -0.84264 |
| H | 1.38513  | 1.88653  | 0.96197  |
| H | 0.73478  | 1.76625  | -0.68462 |
| H | 1.38513  | -1.88653 | -0.96196 |
| H | 0.73478  | -1.76624 | 0.68464  |
| C | -1.98202 | -0.85726 | 0.92405  |
| H | -2.66199 | -1.47160 | 0.33593  |
| H | -1.34644 | -1.50253 | 1.52946  |
| H | -2.55733 | -0.21965 | 1.59393  |
| C | -1.98201 | 0.85727  | -0.92406 |
| H | -2.66198 | 1.47161  | -0.33593 |
| H | -1.34642 | 1.50253  | -1.52946 |

H -2.55732 0.21965 -1.59393

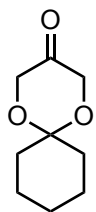

### Dihydroxyacetone 3

M06-2X/def2-TZVP Geometry

|   |          |          |          |
|---|----------|----------|----------|
| C | 1.95424  | 1.06329  | 0.49410  |
| C | 2.56619  | -0.14475 | -0.19224 |
| C | 1.49580  | -1.14800 | -0.58376 |
| O | 3.73817  | -0.28791 | -0.39846 |
| O | 0.78187  | 0.64843  | 1.16231  |
| C | -0.25577 | 0.19785  | 0.30814  |
| O | 0.29841  | -0.44366 | -0.83276 |
| C | -1.08940 | 1.35960  | -0.21535 |
| C | -1.10173 | -0.76841 | 1.12622  |
| C | -2.29406 | 0.86675  | -1.01460 |
| C | -3.14609 | -0.08525 | -0.17854 |
| C | -2.31020 | -1.25691 | 0.33192  |
| H | 2.64237  | 1.45317  | 1.24115  |
| H | 1.76152  | 1.84618  | -0.24856 |
| H | 1.78136  | -1.65559 | -1.50283 |
| H | 1.38774  | -1.89495 | 0.21142  |
| H | -1.42199 | 1.93385  | 0.65302  |
| H | -0.45610 | 2.00651  | -0.82512 |
| H | -0.47511 | -1.60088 | 1.45239  |
| H | -1.42181 | -0.23973 | 2.02772  |
| H | -2.88741 | 1.71971  | -1.34785 |
| H | -1.94055 | 0.34949  | -1.91002 |
| H | -3.56400 | 0.45926  | 0.67526  |
| H | -3.99000 | -0.45189 | -0.76550 |
| H | -1.96177 | -1.84775 | -0.51951 |
| H | -2.91585 | -1.91728 | 0.95451  |

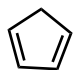

### Cyclopentadiene

M06/def2-TZVP Geometry

|   |          |          |          |
|---|----------|----------|----------|
| C | -1.16941 | 0.28067  | 0.00000  |
| C | -0.72913 | -0.98349 | -0.00000 |
| C | 0.72911  | -0.98350 | -0.00000 |

|   |          |          |          |
|---|----------|----------|----------|
| C | 1.16942  | 0.28065  | 0.00000  |
| C | 0.00001  | 1.20527  | 0.00001  |
| H | 1.34407  | -1.87389 | -0.00001 |
| H | 2.19963  | 0.60781  | 0.00000  |
| H | 0.00002  | 1.86728  | 0.87460  |
| H | -1.34410 | -1.87387 | -0.00001 |
| H | -2.19962 | 0.60785  | 0.00000  |
| H | 0.00002  | 1.86729  | -0.87458 |

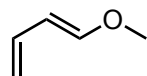

**Diene 1**

M06/def2-TZVP Geometry

|   |          |          |          |
|---|----------|----------|----------|
| C | -2.66134 | -0.38377 | 0.24549  |
| C | -1.83466 | 0.58038  | -0.14499 |
| C | -0.38254 | 0.55698  | -0.05782 |
| C | 0.32993  | -0.56244 | -0.20764 |
| H | 0.11893  | 1.50620  | 0.09787  |
| O | 1.65822  | -0.71528 | -0.12561 |
| H | -2.26583 | 1.48581  | -0.56761 |
| H | -3.73148 | -0.30095 | 0.10434  |
| H | -2.30029 | -1.28501 | 0.73010  |
| H | -0.15321 | -1.50612 | -0.44399 |
| C | 2.41395  | 0.42187  | 0.20188  |
| H | 3.45380  | 0.10617  | 0.26063  |
| H | 2.31599  | 1.19893  | -0.56458 |
| H | 2.10429  | 0.83907  | 1.16668  |

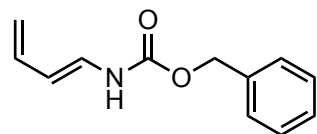

**Diene 2**

M06/def2-TZVP Geometry

|   |          |          |          |
|---|----------|----------|----------|
| C | -5.26230 | 1.74905  | 0.11469  |
| C | -5.20909 | 0.56905  | -0.49452 |
| C | -4.00853 | -0.19453 | -0.78448 |
| C | -2.89593 | -0.14946 | -0.05093 |
| H | -4.03971 | -0.86073 | -1.64452 |
| N | -1.74117 | -0.84590 | -0.34772 |
| H | -6.14286 | 0.11773  | -0.82296 |
| H | -6.20775 | 2.23150  | 0.32678  |
| H | -4.36479 | 2.27945  | 0.41553  |
| H | -2.82254 | 0.43739  | 0.85819  |
| C | -0.63945 | -0.83685 | 0.46271  |

|   |          |          |          |
|---|----------|----------|----------|
| O | -0.54480 | -0.23512 | 1.49695  |
| O | 0.31289  | -1.61543 | -0.07877 |
| H | -1.68664 | -1.38827 | -1.19537 |
| C | 1.56601  | -1.63996 | 0.61861  |
| H | 1.37934  | -1.63498 | 1.69386  |
| H | 2.01392  | -2.59467 | 0.33803  |
| C | 4.05144  | 1.62785  | -0.57278 |
| C | 3.89815  | 0.52962  | -1.40403 |
| C | 3.09905  | -0.52702 | -1.00833 |
| C | 2.44284  | -0.49769 | 0.21626  |
| C | 2.59853  | 0.60769  | 1.04087  |
| C | 3.40210  | 1.66507  | 0.64913  |
| H | 4.68016  | 2.45589  | -0.87901 |
| H | 4.40759  | 0.49595  | -2.36003 |
| H | 2.97853  | -1.39212 | -1.65373 |
| H | 2.07235  | 0.63793  | 1.98862  |
| H | 3.51892  | 2.52367  | 1.29999  |

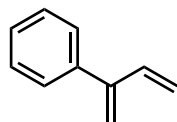

**Diene 3**

M06/def2-TZVP Geometry

|   |          |          |          |
|---|----------|----------|----------|
| C | -1.77818 | 1.64665  | -0.39091 |
| C | -1.29149 | 0.47379  | 0.01845  |
| C | -2.18437 | -0.58852 | 0.50216  |
| C | -3.35690 | -0.89933 | -0.03216 |
| H | -1.82425 | -1.15956 | 1.35620  |
| H | -1.13779 | 2.41891  | -0.79978 |
| H | -2.83701 | 1.86572  | -0.32819 |
| H | -3.72678 | -0.39263 | -0.91742 |
| H | -3.98346 | -1.67646 | 0.38771  |
| C | 2.89250  | -0.39012 | -0.03669 |
| C | 1.96635  | -1.39736 | -0.24456 |
| C | 0.61260  | -1.11420 | -0.21344 |
| C | 0.15617  | 0.18232  | 0.01530  |
| C | 1.10106  | 1.18314  | 0.23398  |
| C | 2.45357  | 0.90169  | 0.20516  |
| H | 3.95323  | -0.61136 | -0.05521 |
| H | 2.29939  | -2.41133 | -0.43409 |
| H | -0.10755 | -1.90629 | -0.39021 |
| H | 0.76505  | 2.19067  | 0.45302  |
| H | 3.17138  | 1.69396  | 0.38425  |

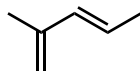

**Diene 4**

M06/def2-TZVP Geometry

|   |          |          |          |
|---|----------|----------|----------|
| C | -1.44139 | 1.36871  | -0.09029 |
| C | -1.08639 | 0.08681  | -0.05750 |
| C | 0.29938  | -0.35677 | -0.22963 |
| C | 1.38279  | 0.28036  | 0.20117  |
| H | 0.43071  | -1.31861 | -0.72836 |
| H | -2.47081 | 1.67162  | 0.06341  |
| H | -0.72074 | 2.15430  | -0.28543 |
| H | 1.25138  | 1.21072  | 0.75160  |
| C | -2.08699 | -1.00681 | 0.13744  |
| H | -1.84787 | -1.60404 | 1.02227  |
| H | -3.09856 | -0.61531 | 0.24700  |
| H | -2.07565 | -1.69461 | -0.71396 |
| C | 2.77725  | -0.18727 | 0.00312  |
| H | 3.36348  | 0.54389  | -0.56173 |
| H | 3.29304  | -0.32361 | 0.95811  |
| H | 2.80722  | -1.13446 | -0.53876 |

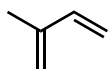

**Diene 5**

M06/def2-TZVP Geometry

|   |          |          |          |
|---|----------|----------|----------|
| C | -0.58716 | 1.43260  | -0.08943 |
| C | -0.45258 | 0.10997  | -0.05839 |
| C | 0.84389  | -0.55027 | -0.24446 |
| C | 2.01254  | -0.09969 | 0.18967  |
| H | 0.81115  | -1.51002 | -0.75953 |
| H | -1.55073 | 1.90437  | 0.06568  |
| H | 0.25550  | 2.08473  | -0.28730 |
| H | 2.08955  | 0.82240  | 0.75629  |
| H | 2.93238  | -0.64104 | 0.00692  |
| C | -1.61581 | -0.80656 | 0.14279  |
| H | -1.47002 | -1.43803 | 1.02405  |
| H | -2.54853 | -0.25525 | 0.26319  |
| H | -1.72457 | -1.48348 | -0.71035 |

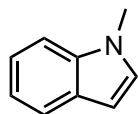

### N-Me indole

#### M06/def2-TZVP Geometry

|   |          |          |          |
|---|----------|----------|----------|
| C | 1.20383  | 1.05398  | 0.00000  |
| C | 0.00000  | 0.36010  | 0.00000  |
| C | -0.05904 | -1.04997 | 0.00000  |
| C | 1.13500  | -1.77161 | 0.00000  |
| C | 2.33073  | -1.08795 | 0.00000  |
| C | 2.36534  | 0.31119  | 0.00000  |
| C | -1.44107 | -1.40254 | 0.00000  |
| C | -2.14355 | -0.23833 | 0.00000  |
| N | -1.28635 | 0.83561  | 0.00000  |
| C | -1.65515 | 2.22257  | 0.00000  |
| H | 1.23167  | 2.13816  | 0.00000  |
| H | 1.12005  | -2.85603 | 0.00000  |
| H | 3.26422  | -1.63867 | 0.00000  |
| H | 3.32301  | 0.81865  | 0.00000  |
| H | -1.85982 | -2.39626 | 0.00000  |
| H | -3.21081 | -0.07126 | 0.00000  |
| H | -2.74115 | 2.30422  | 0.00000  |
| H | -1.26960 | 2.73359  | 0.88675  |
| H | -1.26960 | 2.73359  | -0.88675 |

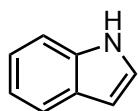

### Indole

#### M06/def2-TZVP Geometry

|   |          |          |         |
|---|----------|----------|---------|
| C | 1.35918  | 0.99681  | 0.00000 |
| C | 0.00000  | 0.70980  | 0.00000 |
| C | -0.49042 | -0.61234 | 0.00000 |
| C | 0.42294  | -1.66827 | 0.00000 |
| C | 1.77065  | -1.38796 | 0.00000 |
| C | 2.23469  | -0.06687 | 0.00000 |
| C | -1.91558 | -0.52593 | 0.00000 |
| C | -2.23455 | 0.79503  | 0.00000 |
| N | -1.08551 | 1.54786  | 0.00000 |
| H | 1.71863  | 2.01998  | 0.00000 |
| H | 0.07268  | -2.69459 | 0.00000 |
| H | 2.48869  | -2.19971 | 0.00000 |
| H | 3.30202  | 0.12101  | 0.00000 |
| H | -2.61593 | -1.34594 | 0.00000 |
| H | -3.20214 | 1.27234  | 0.00000 |

H -1.04685 2.55023 0.00000

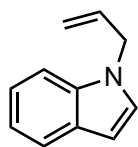

**N-allyl indole**

M06/def2-TZVP Geometry

|   |          |          |          |
|---|----------|----------|----------|
| C | -0.73823 | -1.39681 | -0.49835 |
| C | -0.30871 | -0.08365 | -0.35153 |
| C | -1.16094 | 0.93861  | 0.11746  |
| C | -2.48689 | 0.62476  | 0.41875  |
| C | -2.91977 | -0.67319 | 0.26187  |
| C | -2.05247 | -1.67507 | -0.18893 |
| C | -0.38103 | 2.13287  | 0.17106  |
| C | 0.86738  | 1.80732  | -0.25610 |
| N | 0.92352  | 0.47503  | -0.59405 |
| H | -0.06508 | -2.17857 | -0.83241 |
| H | -3.16419 | 1.39295  | 0.77524  |
| H | -3.94663 | -0.92883 | 0.49553  |
| H | -2.42002 | -2.68926 | -0.29223 |
| H | -0.71259 | 3.11285  | 0.47528  |
| H | 1.75092  | 2.42062  | -0.35888 |
| C | 2.12123  | -0.24451 | -0.92917 |
| C | 2.82010  | -0.85722 | 0.24266  |
| H | 1.87444  | -1.01961 | -1.66422 |
| H | 2.79879  | 0.44354  | -1.44720 |
| C | 2.43424  | -0.74774 | 1.50069  |
| H | 2.99111  | -1.21535 | 2.30254  |
| H | 1.54560  | -0.18968 | 1.77913  |
| H | 3.71340  | -1.42616 | -0.00485 |

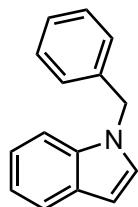

**N-Bn indole**

M06/def2-TZVP Geometry

|   |         |          |          |
|---|---------|----------|----------|
| C | 1.30407 | -1.24647 | -0.88378 |
| C | 1.39413 | 0.06034  | -0.42036 |
| C | 2.46238 | 0.50240  | 0.38795  |
| C | 3.47751 | -0.39852 | 0.71286  |
| C | 3.39862 | -1.69143 | 0.24533  |
| C | 2.32072 | -2.11233 | -0.54250 |
| C | 2.20861 | 1.87386  | 0.69149  |

|   |          |          |          |
|---|----------|----------|----------|
| C | 1.04286  | 2.20446  | 0.07530  |
| N | 0.54496  | 1.12304  | -0.61417 |
| H | 0.46227  | -1.57695 | -1.48240 |
| H | 4.31375  | -0.08389 | 1.32739  |
| H | 4.17978  | -2.40049 | 0.49336  |
| H | 2.28354  | -3.13926 | -0.88655 |
| H | 2.82422  | 2.53443  | 1.28102  |
| H | 0.50555  | 3.14163  | 0.05784  |
| C | -0.73879 | 1.05563  | -1.25485 |
| H | -1.04409 | 2.08137  | -1.48630 |
| H | -0.63297 | 0.54612  | -2.21941 |
| C | -3.85366 | -0.82615 | 1.01732  |
| C | -2.69996 | -0.40219 | 1.65288  |
| C | -1.68183 | 0.19667  | 0.92914  |
| C | -1.80881 | 0.37589  | -0.44008 |
| C | -2.96600 | -0.05928 | -1.07293 |
| C | -3.98462 | -0.65376 | -0.35104 |
| H | -4.64760 | -1.29647 | 1.58540  |
| H | -2.58732 | -0.54083 | 2.72189  |
| H | -0.77570 | 0.51928  | 1.43219  |
| H | -3.06600 | 0.06879  | -2.14719 |
| H | -4.88151 | -0.98969 | -0.85852 |

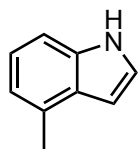

**5-Me indole**

M06/def2-TZVP Geometry

|   |          |          |          |
|---|----------|----------|----------|
| C | 0.04025  | 1.95008  | -0.00000 |
| C | 0.77007  | 0.76688  | 0.00000  |
| C | 0.15285  | -0.49840 | 0.00000  |
| C | -1.24606 | -0.59139 | -0.00000 |
| C | -1.96147 | 0.58830  | -0.00000 |
| C | -1.33173 | 1.83921  | -0.00000 |
| C | 1.19721  | -1.47212 | 0.00000  |
| C | 2.37488  | -0.79217 | 0.00000  |
| N | 2.12562  | 0.55821  | 0.00000  |
| H | 0.52909  | 2.91779  | 0.00000  |
| C | -1.90997 | -1.92680 | -0.00000 |
| H | -3.04601 | 0.54415  | -0.00000 |
| H | -1.93963 | 2.73648  | -0.00000 |
| H | 1.08724  | -2.54520 | 0.00000  |
| H | 3.38797  | -1.16300 | 0.00000  |
| H | 2.82418  | 1.27824  | 0.00001  |



|   |          |          |          |
|---|----------|----------|----------|
| H | -2.99646 | -1.83231 | -0.00001 |
| H | -1.62097 | -2.51258 | -0.87773 |
| H | -1.62098 | -2.51257 | 0.87774  |

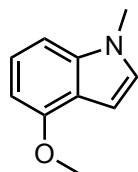

### N-Me 5-OMe indole

#### M06/def2-TZVP Geometry

|   |          |          |          |
|---|----------|----------|----------|
| C | 0.80623  | 1.77533  | -0.00000 |
| C | 1.00676  | 0.39569  | -0.00000 |
| C | -0.05336 | -0.52616 | 0.00000  |
| C | -1.36944 | -0.04614 | -0.00000 |
| C | -1.58185 | 1.31960  | -0.00000 |
| C | -0.49804 | 2.20987  | -0.00000 |
| C | 0.51666  | -1.83050 | 0.00000  |
| C | 1.86610  | -1.66145 | 0.00000  |
| N | 2.17502  | -0.32065 | -0.00000 |
| H | 1.63469  | 2.47368  | -0.00000 |
| O | -2.33981 | -0.98577 | 0.00000  |
| H | -2.58627 | 1.72161  | -0.00000 |
| H | -0.70504 | 3.27378  | -0.00000 |
| H | -0.01451 | -2.76799 | 0.00000  |
| H | 2.65967  | -2.39396 | 0.00000  |
| C | 3.49126  | 0.25028  | 0.00000  |
| C | -3.67236 | -0.55340 | 0.00000  |
| H | -4.29343 | -1.44772 | 0.00000  |
| H | -3.90487 | 0.04177  | 0.89054  |
| H | -3.90488 | 0.04177  | -0.89054 |
| H | 4.22914  | -0.55073 | -0.00001 |
| H | 3.65354  | 0.86992  | -0.88652 |
| H | 3.65355  | 0.86989  | 0.88654  |

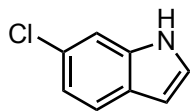

### 7-Cl indole

#### M06/def2-TZVP Geometry

|   |          |          |          |
|---|----------|----------|----------|
| C | -0.47334 | -0.99055 | -0.00000 |
| C | 0.86003  | -0.60169 | -0.00000 |
| C | 1.25556  | 0.75211  | 0.00000  |
| C | 0.26833  | 1.73818  | 0.00000  |

|    |          |          |          |
|----|----------|----------|----------|
| C  | -1.05713 | 1.37015  | 0.00000  |
| C  | -1.40988 | 0.01717  | 0.00000  |
| C  | 2.68265  | 0.76698  | 0.00000  |
| C  | 3.09387  | -0.52765 | -0.00000 |
| N  | 1.99982  | -1.36049 | -0.00000 |
| H  | -0.77601 | -2.03058 | -0.00000 |
| H  | -1.84226 | 2.11548  | 0.00001  |
| Cl | -3.09927 | -0.40192 | 0.00000  |
| H  | 3.32276  | 1.63464  | 0.00000  |
| H  | 4.09232  | -0.93607 | -0.00000 |
| H  | 0.53955  | 2.78780  | 0.00001  |
| H  | 2.03194  | -2.36325 | -0.00000 |

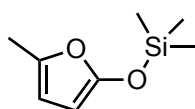

### Furan 1

M06/def2-TZVP Geometry

|    |          |          |          |
|----|----------|----------|----------|
| C  | 2.54107  | -0.26808 | -0.00001 |
| C  | 2.89393  | 1.03316  | 0.00000  |
| C  | 1.69061  | 1.80569  | 0.00001  |
| C  | 0.68500  | 0.90225  | -0.00000 |
| O  | 1.17002  | -0.36092 | -0.00001 |
| H  | 3.90661  | 1.40545  | 0.00001  |
| H  | 1.58091  | 2.87664  | 0.00001  |
| O  | -0.62434 | 1.04784  | -0.00000 |
| H  | 3.06443  | -2.14392 | 0.88136  |
| C  | 3.28939  | -1.53634 | -0.00001 |
| H  | 3.06443  | -2.14391 | -0.88140 |
| H  | 4.35881  | -1.32580 | -0.00001 |
| Si | -1.81801 | -0.12968 | 0.00000  |
| C  | -1.67618 | -1.16897 | -1.53370 |
| H  | -2.50809 | -1.87562 | -1.58952 |
| H  | -1.70429 | -0.54899 | -2.43221 |
| H  | -0.74658 | -1.74024 | -1.54161 |
| C  | -1.67617 | -1.16897 | 1.53371  |
| H  | -1.70427 | -0.54899 | 2.43222  |
| H  | -2.50808 | -1.87561 | 1.58954  |
| H  | -0.74657 | -1.74023 | 1.54161  |
| C  | -3.38512 | 0.86305  | 0.00001  |
| H  | -3.44365 | 1.50192  | 0.88330  |
| H  | -3.44366 | 1.50192  | -0.88329 |
| H  | -4.25850 | 0.20678  | 0.00001  |

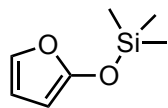

**Furan 2**

M06/def2-TZVP Geometry

|    |          |          |          |
|----|----------|----------|----------|
| C  | 2.73474  | -0.93634 | 0.00000  |
| C  | 3.32491  | 0.27416  | -0.00001 |
| C  | 2.28057  | 1.24692  | -0.00002 |
| C  | 1.12615  | 0.53794  | -0.00001 |
| O  | 1.37374  | -0.78884 | -0.00000 |
| H  | 4.38667  | 0.46123  | -0.00001 |
| H  | 2.36484  | 2.32012  | -0.00002 |
| O  | -0.13230 | 0.92095  | -0.00002 |
| Si | -1.52522 | -0.01610 | 0.00000  |
| C  | -1.57430 | -1.06241 | -1.53409 |
| H  | -2.52110 | -1.60553 | -1.59014 |
| H  | -1.48907 | -0.44758 | -2.43251 |
| H  | -0.76459 | -1.79374 | -1.54256 |
| C  | -1.57428 | -1.06235 | 1.53414  |
| H  | -1.48905 | -0.44749 | 2.43254  |
| H  | -2.52108 | -1.60547 | 1.59022  |
| H  | -0.76458 | -1.79368 | 1.54263  |
| C  | -2.88072 | 1.24984  | -0.00001 |
| H  | -2.82067 | 1.88849  | 0.88331  |
| H  | -2.82068 | 1.88846  | -0.88335 |
| H  | -3.86024 | 0.76611  | 0.00000  |
| H  | 3.09873  | -1.94900 | 0.00001  |

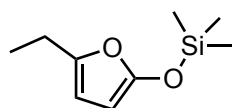

**Furan 3**

M06/def2-TZVP Geometry

|    |          |          |          |
|----|----------|----------|----------|
| C  | -2.15300 | 0.04201  | 0.00000  |
| C  | -2.38051 | 1.37196  | -0.00001 |
| C  | -1.10767 | 2.02482  | -0.00001 |
| C  | -0.19341 | 1.02950  | -0.00001 |
| O  | -0.79735 | -0.18135 | -0.00000 |
| H  | -3.34981 | 1.84517  | -0.00001 |
| H  | -0.89622 | 3.08039  | -0.00001 |
| O  | 1.12374  | 1.04912  | -0.00001 |
| Si | 2.20447  | -0.23216 | -0.00000 |
| C  | 1.96954  | -1.25468 | 1.53366  |

|   |          |          |          |
|---|----------|----------|----------|
| H | 2.73541  | -2.03252 | 1.58906  |
| H | 2.05314  | -0.64009 | 2.43241  |
| H | 0.99315  | -1.74153 | 1.54228  |
| C | 1.96954  | -1.25470 | -1.53365 |
| H | 0.99315  | -1.74155 | -1.54226 |
| H | 2.05315  | -0.64012 | -2.43241 |
| H | 2.73541  | -2.03254 | -1.58904 |
| C | 3.85635  | 0.61198  | -0.00000 |
| H | 3.97398  | 1.24265  | -0.88328 |
| H | 3.97398  | 1.24266  | 0.88327  |
| H | 4.66523  | -0.12231 | -0.00000 |
| C | -3.01378 | -1.15955 | 0.00001  |
| H | -2.77412 | -1.77955 | 0.87272  |
| H | -2.77413 | -1.77955 | -0.87270 |
| C | -4.48785 | -0.81473 | 0.00001  |
| H | -5.10059 | -1.71642 | 0.00001  |
| H | -4.75529 | -0.22813 | 0.88171  |
| H | -4.75529 | -0.22813 | -0.88170 |

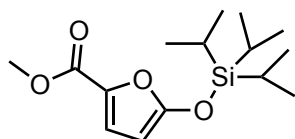

**Furan 4**

M06/def2-TZVP Geometry

|    |          |          |          |
|----|----------|----------|----------|
| C  | -2.43267 | -0.76327 | -0.21027 |
| C  | -2.45707 | -2.09121 | -0.49870 |
| C  | -1.11728 | -2.53736 | -0.54117 |
| C  | -0.35969 | -1.43351 | -0.27070 |
| O  | -1.13077 | -0.35685 | -0.06988 |
| H  | -3.35066 | -2.67231 | -0.66126 |
| H  | -0.74389 | -3.52714 | -0.74027 |
| O  | 0.93085  | -1.26753 | -0.17917 |
| Si | 1.74784  | 0.19526  | 0.12065  |
| C  | 1.30440  | 0.84948  | 1.83718  |
| H  | 2.27060  | 1.20430  | 2.22977  |
| C  | 0.33598  | 2.02664  | 1.84686  |
| C  | 0.79902  | -0.24895 | 2.76927  |
| C  | 3.54536  | -0.35433 | 0.08904  |
| C  | 3.85370  | -1.34871 | 1.20293  |
| C  | 3.97274  | -0.92593 | -1.25675 |
| H  | 4.12557  | 0.56071  | 0.28006  |
| C  | 1.31584  | 1.42214  | -1.23762 |
| C  | 2.35942  | 2.53441  | -1.28802 |
| C  | 1.11224  | 0.80149  | -2.61348 |

|   |          |          |          |
|---|----------|----------|----------|
| H | 0.36053  | 1.86462  | -0.92721 |
| C | -3.44236 | 0.25851  | -0.03347 |
| O | -3.22412 | 1.41303  | 0.22446  |
| O | -4.67341 | -0.25678 | -0.19739 |
| C | -5.73553 | 0.66845  | -0.04272 |
| H | -5.65836 | 1.47799  | -0.77075 |
| H | -6.65410 | 0.10853  | -0.20312 |
| H | -5.73244 | 1.10412  | 0.95805  |
| H | 0.17814  | 2.37822  | 2.87138  |
| H | 0.70143  | 2.87616  | 1.26520  |
| H | -0.64169 | 1.74804  | 1.44399  |
| H | 0.70389  | 0.12966  | 3.79144  |
| H | -0.19353 | -0.59063 | 2.46250  |
| H | 1.45273  | -1.12348 | 2.79770  |
| H | 2.04389  | 3.33639  | -1.96205 |
| H | 2.54230  | 2.98561  | -0.30738 |
| H | 3.31923  | 2.16183  | -1.65925 |
| H | 2.02270  | 0.32351  | -2.98448 |
| H | 0.32353  | 0.04598  | -2.61576 |
| H | 0.83157  | 1.56906  | -3.34175 |
| H | 3.34968  | -1.78138 | -1.53525 |
| H | 3.90686  | -0.19225 | -2.06279 |
| H | 5.00872  | -1.27753 | -1.21783 |
| H | 4.90773  | -1.64254 | 1.17735  |
| H | 3.65098  | -0.94245 | 2.19641  |
| H | 3.25991  | -2.26077 | 1.08776  |

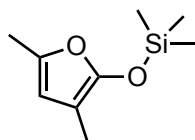

**Furan 5**

M06/def2-TZVP Geometry

|   |          |          |          |
|---|----------|----------|----------|
| C | 2.34315  | -0.85419 | -0.00840 |
| C | 2.82222  | 0.40338  | 0.07366  |
| C | 1.71387  | 1.30578  | -0.04535 |
| C | 0.63587  | 0.50267  | -0.19562 |
| O | 0.98411  | -0.80730 | -0.17880 |
| H | 3.85977  | 0.67131  | 0.20775  |
| C | 1.72392  | 2.78871  | -0.01755 |
| O | -0.64255 | 0.78867  | -0.37787 |
| H | 2.56841  | -2.78431 | 0.88140  |
| C | 2.95753  | -2.19154 | 0.04844  |
| H | 2.77936  | -2.76091 | -0.86824 |
| H | 4.03481  | -2.09112 | 0.18005  |

|    |          |          |          |
|----|----------|----------|----------|
| Si | -1.97162 | -0.14624 | 0.02869  |
| C  | -2.12532 | -1.57813 | -1.14485 |
| H  | -3.04059 | -2.13983 | -0.94126 |
| H  | -2.16807 | -1.23396 | -2.18031 |
| H  | -1.27913 | -2.26001 | -1.04741 |
| C  | -1.78684 | -0.73256 | 1.78328  |
| H  | -1.62454 | 0.10695  | 2.46274  |
| H  | -2.68921 | -1.25650 | 2.10780  |
| H  | -0.94529 | -1.42017 | 1.88496  |
| C  | -3.39989 | 1.02301  | -0.16022 |
| H  | -3.30937 | 1.87066  | 0.52157  |
| H  | -3.45175 | 1.41269  | -1.17881 |
| H  | -4.34383 | 0.51631  | 0.05362  |
| H  | 2.13884  | 3.17532  | 0.91734  |
| H  | 2.32308  | 3.20694  | -0.83112 |
| H  | 0.71072  | 3.18016  | -0.11867 |

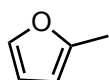

**5-methyl furan**

M06/def2-TZVP Geometry

|   |          |          |          |
|---|----------|----------|----------|
| O | 1.03051  | -0.23913 | 0.00000  |
| C | 0.49667  | -1.48361 | 0.00000  |
| C | -0.85029 | -1.41815 | 0.00000  |
| C | -1.17486 | -0.02991 | 0.00000  |
| C | -0.00000 | 0.64113  | 0.00000  |
| C | 0.34969  | 2.07314  | 0.00000  |
| H | 1.19821  | -2.30158 | 0.00000  |
| H | -1.53218 | -2.25298 | 0.00000  |
| H | -2.15712 | 0.41565  | 0.00000  |
| H | -0.55806 | 2.67574  | 0.00000  |
| H | 0.93890  | 2.34032  | 0.88091  |
| H | 0.93890  | 2.34032  | -0.88091 |

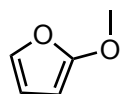

**5-methoxy furan**

M06/def2-TZVP Geometry

|   |          |          |          |
|---|----------|----------|----------|
| O | -0.17242 | -0.92546 | 0.00005  |
| C | -1.54226 | -0.98369 | 0.00002  |
| C | -2.05077 | 0.26360  | -0.00007 |

|   |          |          |          |
|---|----------|----------|----------|
| C | -0.94641 | 1.16657  | -0.00009 |
| C | 0.15405  | 0.37572  | -0.00001 |
| O | 1.43947  | 0.70250  | 0.00001  |
| C | 2.38086  | -0.35068 | 0.00007  |
| H | -1.96883 | -1.97137 | 0.00006  |
| H | -3.09773 | 0.52105  | -0.00011 |
| H | -0.95867 | 2.24283  | -0.00015 |
| H | 3.36191  | 0.11923  | 0.00008  |
| H | 2.27702  | -0.97860 | 0.88875  |
| H | 2.27706  | -0.97866 | -0.88858 |

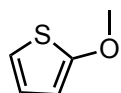

### 5-methoxy thiophene

M06/def2-TZVP Geometry

|   |          |          |          |
|---|----------|----------|----------|
| C | -1.90786 | -0.60265 | 0.00006  |
| C | -1.98240 | 0.75186  | 0.00001  |
| C | -0.72091 | 1.38917  | -0.00009 |
| C | 0.30493  | 0.49425  | -0.00007 |
| O | 1.60285  | 0.82146  | -0.00019 |
| C | 2.53534  | -0.22926 | 0.00003  |
| H | -2.70731 | -1.32637 | 0.00012  |
| H | -2.92178 | 1.28912  | 0.00000  |
| H | -0.55884 | 2.45801  | -0.00017 |
| H | 3.52500  | 0.22310  | -0.00016 |
| H | 2.42680  | -0.85668 | 0.89234  |
| H | 2.42670  | -0.85714 | -0.89195 |
| S | -0.27425 | -1.14512 | 0.00011  |

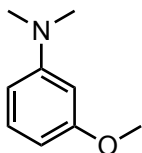

### Aromatic amine 1

M06/def2-TZVP Geometry

|   |          |          |          |
|---|----------|----------|----------|
| C | 0.74269  | 1.52603  | -0.01319 |
| C | -0.54106 | 2.02328  | 0.00296  |
| C | -1.65509 | 1.19685  | 0.00551  |
| C | -1.44528 | -0.17545 | -0.00618 |
| C | -0.15959 | -0.69920 | -0.02177 |
| C | 0.95841  | 0.13624  | -0.03155 |
| N | 2.23117  | -0.38490 | -0.06047 |
| O | -2.43900 | -1.09522 | -0.00115 |

|   |          |          |          |
|---|----------|----------|----------|
| C | -3.76221 | -0.63689 | 0.01828  |
| C | 3.36811  | 0.48982  | 0.03843  |
| C | 2.42302  | -1.80738 | 0.01947  |
| H | 1.57671  | 2.21395  | -0.01131 |
| H | -0.68517 | 3.09808  | 0.01593  |
| H | -2.64869 | 1.62207  | 0.01945  |
| H | -0.06748 | -1.77691 | -0.02607 |
| H | -4.39972 | -1.51976 | 0.02017  |
| H | -3.97464 | -0.04415 | 0.91544  |
| H | -3.99664 | -0.03223 | -0.86535 |
| H | 3.39579  | 1.21409  | -0.78296 |
| H | 3.38592  | 1.05456  | 0.98010  |
| H | 4.28081  | -0.10085 | -0.01489 |
| H | 1.93481  | -2.32854 | -0.81140 |
| H | 3.48704  | -2.03095 | -0.03134 |
| H | 2.03116  | -2.23310 | 0.95300  |

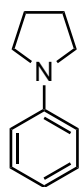

### Aromatic amine 2

#### M06/def2-TZVP Geometry

|   |          |          |          |
|---|----------|----------|----------|
| C | 1.25008  | -1.19668 | 0.09842  |
| C | 2.63130  | -1.18657 | 0.09685  |
| C | 3.33908  | -0.00004 | 0.00040  |
| C | 2.63140  | 1.18651  | -0.09648 |
| C | 1.25018  | 1.19665  | -0.09888 |
| C | 0.52626  | -0.00000 | -0.00044 |
| N | -0.84224 | 0.00003  | -0.00092 |
| C | -1.64640 | 1.20287  | 0.02679  |
| C | -3.04257 | 0.68664  | 0.32617  |
| C | -3.04283 | -0.68664 | -0.32533 |
| C | -1.64644 | -1.20279 | -0.02697 |
| H | 0.72506  | -2.13966 | 0.18836  |
| H | 3.16276  | -2.12857 | 0.17694  |
| H | 4.42188  | -0.00006 | 0.00073  |
| H | 0.72523  | 2.13963  | -0.18922 |
| H | -1.28739 | 1.90168  | 0.79031  |
| H | -1.61263 | 1.73329  | -0.93769 |
| H | -3.17450 | 0.58568  | 1.40756  |
| H | -3.82628 | 1.34727  | -0.04518 |
| H | -3.82624 | -1.34727 | 0.04666  |
| H | -3.17556 | -0.58573 | -1.40663 |



|   |          |          |          |
|---|----------|----------|----------|
| H | -1.28819 | -1.90216 | -0.79031 |
| H | -1.61182 | -1.73251 | 0.93789  |
| H | 3.16293  | 2.12849  | -0.17626 |

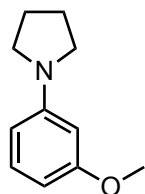

**Aromatic amine 3**

M06/def2-TZVP Geometry

|   |          |          |          |
|---|----------|----------|----------|
| C | 0.13336  | 1.71540  | -0.08588 |
| C | 1.46974  | 2.04537  | -0.09508 |
| C | 2.46914  | 1.08359  | -0.04625 |
| C | 2.08788  | -0.25076 | 0.01406  |
| C | 0.74632  | -0.60698 | 0.02686  |
| C | -0.25330 | 0.36508  | -0.02357 |
| N | -1.57417 | 0.01225  | -0.01362 |
| O | 2.95843  | -1.28653 | 0.06881  |
| C | 4.32859  | -0.99806 | 0.06708  |
| C | -2.03876 | -1.35757 | -0.05853 |
| C | -3.52744 | -1.21640 | -0.32023 |
| C | -3.86930 | 0.09409  | 0.36978  |
| C | -2.66280 | 0.96355  | 0.06277  |
| H | -0.61397 | 2.49611  | -0.14030 |
| H | 1.75117  | 3.09147  | -0.14677 |
| H | 3.50883  | 1.37891  | -0.05687 |
| H | 0.50810  | -1.66111 | 0.09007  |
| H | 4.84997  | -1.95287 | 0.11684  |
| H | 4.63369  | -0.47495 | -0.84656 |
| H | 4.61822  | -0.39062 | 0.93227  |
| H | -1.52701 | -1.92240 | -0.84522 |
| H | -1.84485 | -1.87931 | 0.89160  |
| H | -3.70646 | -1.12881 | -1.39603 |
| H | -4.10350 | -2.06666 | 0.04550  |
| H | -4.80621 | 0.53625  | 0.03025  |
| H | -3.94547 | -0.06300 | 1.44987  |
| H | -2.48055 | 1.71288  | 0.84044  |
| H | -2.79077 | 1.50673  | -0.88631 |

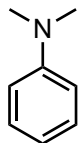

**Aromatic amine 4**

M06/def2-TZVP Geometry

|   |          |          |          |
|---|----------|----------|----------|
| C | -0.54640 | 1.19905  | -0.01516 |
| C | -1.92769 | 1.18895  | 0.00771  |
| C | -2.63635 | -0.00000 | 0.01809  |
| C | -1.92769 | -1.18895 | 0.00771  |
| C | -0.54639 | -1.19905 | -0.01516 |
| C | 0.18120  | 0.00000  | -0.03370 |
| N | 1.55793  | 0.00000  | -0.07149 |
| C | 2.27621  | 1.24124  | 0.02830  |
| C | 2.27621  | -1.24124 | 0.02830  |
| H | -0.03068 | 2.15015  | -0.01858 |
| H | -2.45729 | 2.13525  | 0.02030  |
| H | -3.71896 | -0.00000 | 0.03754  |
| H | -0.03068 | -2.15015 | -0.01858 |
| H | 2.02221  | 1.92309  | -0.79064 |
| H | 2.08017  | 1.76875  | 0.97179  |
| H | 3.34505  | 1.04383  | -0.02971 |
| H | 2.02221  | -1.92309 | -0.79064 |
| H | 3.34505  | -1.04383 | -0.02971 |
| H | 2.08017  | -1.76875 | 0.97179  |
| H | -2.45729 | -2.13525 | 0.02030  |

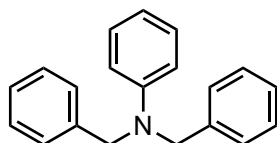

**Aromatic amine 5**

M06/def2-TZVP Geometry

|   |          |          |          |
|---|----------|----------|----------|
| C | -1.00482 | 2.26331  | -0.65324 |
| C | -0.99409 | 3.64510  | -0.65256 |
| C | 0.00090  | 4.35239  | 0.00003  |
| C | 0.99556  | 3.64464  | 0.65263  |
| C | 1.00562  | 2.26284  | 0.65335  |
| C | 0.00022  | 1.53909  | 0.00008  |
| N | -0.00009 | 0.15547  | 0.00008  |
| C | 0.81929  | -0.60354 | 0.90606  |
| C | -0.81964 | -0.60320 | -0.90603 |
| H | -1.81938 | 1.74280  | -1.14217 |
| H | -1.79012 | 4.17509  | -1.16367 |

|   |          |          |          |
|---|----------|----------|----------|
| H | 0.00117  | 5.43519  | 0.00001  |
| H | 1.81994  | 1.74196  | 1.14228  |
| H | 0.92907  | -0.05057 | 1.84601  |
| H | 0.27125  | -1.51579 | 1.17564  |
| H | -0.27182 | -1.51554 | -1.17576 |
| H | -0.92929 | -0.05005 | -1.84589 |
| H | 1.79186  | 4.17426  | 1.16372  |
| C | 4.71145  | -1.75714 | -0.50035 |
| C | 3.91994  | -0.92971 | -1.27574 |
| C | 2.66205  | -0.54958 | -0.83364 |
| C | 2.18250  | -0.99350 | 0.38848  |
| C | 2.98428  | -1.82617 | 1.16088  |
| C | 4.23897  | -2.20556 | 0.72361  |
| H | 5.69449  | -2.05372 | -0.84672 |
| H | 4.28246  | -0.57327 | -2.23312 |
| H | 2.04521  | 0.10481  | -1.44092 |
| H | 2.61272  | -2.18124 | 2.11848  |
| H | 4.85167  | -2.85571 | 1.33757  |
| C | -4.71202 | -1.75627 | 0.50024  |
| C | -3.92034 | -0.92912 | 1.27575  |
| C | -2.66238 | -0.54917 | 0.83371  |
| C | -2.18293 | -0.99298 | -0.38850 |
| C | -2.98487 | -1.82538 | -1.16101 |
| C | -4.23963 | -2.20459 | -0.72380 |
| H | -5.69512 | -2.05271 | 0.84657  |
| H | -4.28277 | -0.57278 | 2.23320  |
| H | -2.04538 | 0.10497  | 1.44109  |
| H | -2.61338 | -2.18038 | -2.11867 |
| H | -4.85246 | -2.85453 | -1.33785 |

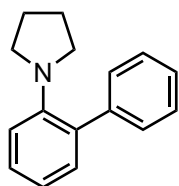

**Aromatic amine 6**

M06/def2-TZVP Geometry

|   |          |         |          |
|---|----------|---------|----------|
| C | -0.09647 | 1.22731 | -0.04337 |
| C | -0.16173 | 2.60873 | -0.18359 |
| C | 0.96087  | 3.41281 | -0.11769 |
| C | 2.18679  | 2.81605 | 0.11037  |
| C | 2.28927  | 1.44270 | 0.21558  |
| C | 1.16651  | 0.61241 | 0.10502  |
| H | -1.14227 | 3.05947 | -0.30047 |
| H | 0.87328  | 4.48790 | -0.21320 |

|   |          |          |          |
|---|----------|----------|----------|
| H | 3.26694  | 1.00388  | 0.36411  |
| H | 3.08285  | 3.42076  | 0.19387  |
| N | 1.31115  | -0.76452 | 0.14108  |
| C | 2.59587  | -1.36695 | 0.44585  |
| C | 2.34414  | -2.84538 | 0.24984  |
| C | 1.44196  | -2.83898 | -0.97193 |
| C | 0.51570  | -1.66478 | -0.70056 |
| H | 3.38295  | -1.03043 | -0.24998 |
| H | 2.92130  | -1.10444 | 1.45718  |
| H | 3.26353  | -3.41572 | 0.11496  |
| H | 1.81202  | -3.25461 | 1.11383  |
| H | 2.04167  | -2.65034 | -1.86768 |
| H | 0.89823  | -3.77145 | -1.12562 |
| H | -0.39398 | -1.99662 | -0.18678 |
| H | 0.19657  | -1.15765 | -1.61673 |
| C | -3.81726 | -0.85293 | 0.26494  |
| C | -3.51939 | -0.12862 | -0.87677 |
| C | -2.31065 | 0.53823  | -0.98145 |
| C | -1.37434 | 0.48597  | 0.04603  |
| C | -1.69067 | -0.23717 | 1.19305  |
| C | -2.89950 | -0.90023 | 1.30220  |
| H | -4.76282 | -1.37575 | 0.34853  |
| H | -4.23136 | -0.08396 | -1.69306 |
| H | -2.07331 | 1.09829  | -1.88051 |
| H | -0.97117 | -0.27761 | 2.00415  |
| H | -3.12912 | -1.45511 | 2.20481  |

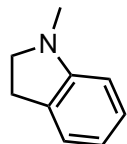

**Aromatic amine 7**

M06/def2-TZVP Geometry

|   |          |          |          |
|---|----------|----------|----------|
| C | -0.39275 | 0.93513  | -0.03792 |
| C | -1.74339 | 1.16211  | 0.07335  |
| C | -2.61735 | 0.07764  | 0.09967  |
| C | -2.12135 | -1.21114 | 0.01379  |
| C | -0.75747 | -1.45547 | -0.09998 |
| C | 0.09963  | -0.36865 | -0.13646 |
| H | -2.12511 | 2.17507  | 0.15086  |
| H | -3.68358 | 0.24247  | 0.19559  |
| H | -0.38278 | -2.47098 | -0.15487 |
| H | -2.80645 | -2.05084 | 0.04595  |
| N | 1.48177  | -0.35714 | -0.27344 |
| C | 0.77086  | 1.87885  | -0.12076 |

|   |         |          |          |
|---|---------|----------|----------|
| C | 1.94480 | 0.95055  | 0.17653  |
| H | 2.14798 | 0.92300  | 1.26160  |
| H | 2.87147 | 1.23036  | -0.33018 |
| C | 2.25468 | -1.49474 | 0.13224  |
| H | 3.30600 | -1.32386 | -0.10686 |
| H | 2.17416 | -1.69365 | 1.21372  |
| H | 1.93462 | -2.38895 | -0.40513 |
| H | 0.85503 | 2.29304  | -1.13204 |
| H | 0.71035 | 2.71864  | 0.57267  |

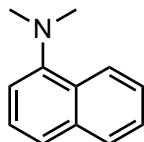

**Aromatic amine 8**

M06/def2-TZVP Geometry

|   |          |          |          |
|---|----------|----------|----------|
| C | 0.38980  | -0.18396 | -0.08160 |
| C | 1.42491  | 0.77583  | 0.06602  |
| C | 1.09899  | 2.14615  | 0.15472  |
| C | -0.20097 | 2.54582  | 0.08927  |
| C | -1.23572 | 1.60155  | -0.02116 |
| C | -0.96896 | 0.25611  | -0.08306 |
| C | 2.76529  | 0.33704  | 0.08845  |
| H | 1.90150  | 2.86860  | 0.25839  |
| H | -2.26152 | 1.94887  | -0.03474 |
| H | -0.45178 | 3.59907  | 0.14271  |
| N | -1.99056 | -0.71294 | -0.16673 |
| C | -2.18013 | -1.48907 | 1.04523  |
| H | -1.22527 | -1.81229 | 1.45684  |
| H | -2.70325 | -0.90340 | 1.81951  |
| C | -3.25673 | -0.27339 | -0.69586 |
| H | -3.87391 | -1.14919 | -0.91009 |
| H | -3.82435 | 0.36379  | 0.00391  |
| H | -3.10947 | 0.27885  | -1.62472 |
| C | 0.74838  | -1.53556 | -0.26615 |
| H | -2.78011 | -2.37627 | 0.82686  |
| C | 2.05744  | -1.92665 | -0.25327 |
| C | 3.07857  | -0.98301 | -0.05690 |
| H | 2.31128  | -2.96896 | -0.40797 |
| H | -0.03521 | -2.25986 | -0.45145 |
| H | 4.11388  | -1.30318 | -0.04076 |
| H | 3.54699  | 1.07939  | 0.21432  |

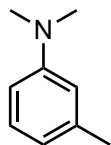

**Aromatic amine 9**

M06/def2-TZVP Geometry

|   |          |          |          |
|---|----------|----------|----------|
| C | -0.50842 | -0.78682 | -0.02619 |
| C | -1.83409 | -0.38352 | -0.01218 |
| C | -2.13441 | 0.97287  | -0.00007 |
| C | -1.10605 | 1.89708  | 0.00589  |
| C | 0.21677  | 1.50009  | -0.00404 |
| C | 0.54577  | 0.13756  | -0.02618 |
| H | -3.16938 | 1.29751  | 0.00501  |
| H | 0.99315  | 2.25315  | 0.00047  |
| H | -1.33477 | 2.95720  | 0.01683  |
| N | 1.85793  | -0.27893 | -0.05277 |
| C | 2.91778  | 0.68827  | 0.03142  |
| H | 2.88376  | 1.40245  | -0.79912 |
| H | 2.88807  | 1.26530  | 0.96543  |
| C | 2.16895  | -1.68035 | 0.01481  |
| H | 3.24891  | -1.81136 | -0.02036 |
| H | 1.80227  | -2.14878 | 0.93804  |
| H | 1.74122  | -2.23412 | -0.82877 |
| H | 3.87710  | 0.17617  | -0.01508 |
| H | -0.29814 | -1.84968 | -0.03958 |
| C | -2.92868 | -1.40239 | 0.02175  |
| H | -3.80598 | -1.06160 | -0.53133 |
| H | -2.60616 | -2.35482 | -0.40238 |
| H | -3.25137 | -1.59567 | 1.04897  |

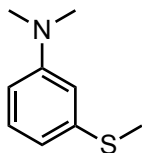

**Aromatic amine 10**

M06/def2-TZVP Geometry

|   |          |          |          |
|---|----------|----------|----------|
| C | 0.11509  | -0.59148 | -0.01954 |
| C | -1.13562 | 0.01535  | -0.00831 |
| C | -1.24328 | 1.39931  | 0.00056  |
| C | -0.07924 | 2.15097  | 0.00017  |
| C | 1.16820  | 1.56552  | -0.01166 |
| C | 1.29009  | 0.16588  | -0.02732 |
| H | -2.20505 | 1.89345  | 0.01038  |
| H | 2.04738  | 2.19488  | -0.00842 |

|   |          |          |          |
|---|----------|----------|----------|
| H | -0.14985 | 3.23324  | 0.01107  |
| N | 2.52454  | -0.44008 | -0.05119 |
| C | 3.71777  | 0.35786  | 0.03551  |
| H | 3.77467  | 0.93037  | 0.97076  |
| H | 4.58887  | -0.29291 | -0.01146 |
| C | 2.62246  | -1.87277 | 0.01943  |
| H | 2.19749  | -2.27795 | 0.94737  |
| H | 2.10873  | -2.35659 | -0.81882 |
| H | 3.67005  | -2.16447 | -0.02457 |
| H | 3.79229  | 1.06965  | -0.79405 |
| H | 0.16115  | -1.67375 | -0.02198 |
| S | -2.51030 | -1.08867 | -0.00464 |
| C | -3.92269 | 0.02112  | 0.02460  |
| H | -3.95510 | 0.65461  | -0.86259 |
| H | -4.80338 | -0.61986 | 0.03048  |
| H | -3.93075 | 0.63809  | 0.92392  |

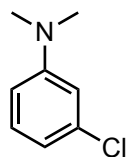

**Aromatic amine 11**

M06/def2-TZVP Geometry

|    |          |          |          |
|----|----------|----------|----------|
| C  | -0.28895 | -0.60286 | -0.00776 |
| C  | -1.51720 | 0.02516  | -0.00111 |
| C  | -1.64897 | 1.40040  | 0.00361  |
| C  | -0.48581 | 2.15089  | 0.00254  |
| C  | 0.76060  | 1.55817  | -0.00418 |
| C  | 0.88774  | 0.16035  | -0.01214 |
| H  | -2.62795 | 1.86000  | 0.00943  |
| H  | 1.64051  | 2.18670  | -0.00310 |
| H  | -0.55259 | 3.23296  | 0.00802  |
| N  | 2.11954  | -0.44537 | -0.02466 |
| C  | 3.31436  | 0.35460  | 0.01249  |
| H  | 3.37852  | 0.96541  | 0.92180  |
| H  | 4.18451  | -0.29828 | -0.01212 |
| C  | 2.21713  | -1.88009 | 0.00813  |
| H  | 1.77034  | -2.30690 | 0.91491  |
| H  | 1.72512  | -2.34371 | -0.85480 |
| H  | 3.26569  | -2.16977 | -0.01465 |
| H  | 3.38144  | 1.03074  | -0.84771 |
| H  | -0.25897 | -1.68327 | -0.00940 |
| Cl | -2.95158 | -0.96212 | 0.00299  |

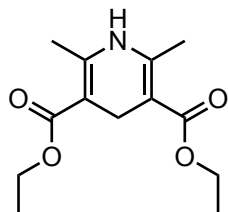

**HE**

M06/def2-TZVP Geometry

|   |          |          |          |
|---|----------|----------|----------|
| C | 0.00003  | 0.10426  | 0.01095  |
| C | -1.25800 | -0.72479 | 0.00295  |
| C | -1.21880 | -2.07311 | 0.00599  |
| N | 0.00006  | -2.71383 | 0.01228  |
| C | 1.21891  | -2.07308 | 0.00594  |
| C | 1.25808  | -0.72477 | 0.00299  |
| C | -2.38939 | -2.99666 | 0.00159  |
| C | 2.38951  | -2.99663 | 0.00152  |
| C | 2.54834  | -0.03742 | -0.00601 |
| C | -2.54828 | -0.03751 | -0.00626 |
| O | 2.38252  | 1.30036  | 0.00315  |
| O | -2.38257 | 1.30028  | 0.00331  |
| O | -3.64439 | -0.54625 | -0.02065 |
| O | 3.64447  | -0.54612 | -0.01988 |
| C | 3.57713  | 2.07634  | -0.00477 |
| C | 3.18026  | 3.52379  | 0.00595  |
| C | -3.57725 | 2.07613  | -0.00477 |
| C | -3.18055 | 3.52362  | 0.00673  |
| H | 0.00001  | 0.77414  | 0.87918  |
| H | 0.00005  | 0.78896  | -0.84520 |
| H | 0.00007  | -3.71924 | 0.01311  |
| H | -3.04395 | -2.81004 | 0.85194  |
| H | -3.00477 | -2.84952 | -0.88559 |
| H | -2.05856 | -4.03710 | 0.03156  |
| H | 3.00558  | -2.84860 | -0.88502 |
| H | 2.05867  | -4.03710 | 0.03017  |
| H | 3.04338  | -2.81091 | 0.85262  |
| H | 4.16738  | 1.81979  | -0.88957 |
| H | 4.18434  | 1.81153  | 0.86602  |
| H | 2.59525  | 3.76115  | 0.89599  |
| H | 2.57875  | 3.76973  | -0.87066 |
| H | 4.06809  | 4.15786  | 0.00073  |
| H | -4.18480 | 1.81088  | 0.86564  |
| H | -4.16710 | 1.81990  | -0.88994 |
| H | -2.59605 | 3.76070  | 0.89719  |
| H | -2.57858 | 3.76997  | -0.86945 |
| H | -4.06844 | 4.15759  | 0.00128  |



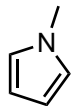

### N-Me pyrrole

#### M06/def2-TZVP Geometry

|   |          |          |          |
|---|----------|----------|----------|
| N | -0.62070 | 0.00000  | -0.03413 |
| C | 0.17340  | -1.11101 | -0.01253 |
| C | 1.48085  | -0.70654 | 0.01382  |
| C | 1.48086  | 0.70654  | 0.01382  |
| C | 0.17341  | 1.11101  | -0.01253 |
| C | -2.05788 | -0.00000 | 0.02328  |
| H | -0.26405 | -2.09772 | -0.02197 |
| H | 2.34272  | -1.35492 | 0.01986  |
| H | 2.34272  | 1.35492  | 0.01987  |
| H | -0.26404 | 2.09773  | -0.02196 |
| H | -2.44653 | 0.88411  | -0.48280 |
| H | -2.44656 | -0.88389 | -0.48318 |
| H | -2.42316 | -0.00021 | 1.05388  |

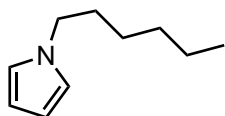

### N-hexyl pyrrole

#### M06/def2-TZVP Geometry

|   |          |          |          |
|---|----------|----------|----------|
| N | 1.97243  | 0.48389  | -0.13958 |
| C | 2.23115  | -0.46146 | -1.09077 |
| C | 2.82913  | -1.53417 | -0.48557 |
| C | 2.93000  | -1.23160 | 0.89152  |
| C | 2.38919  | 0.01340  | 1.07354  |
| C | 1.20535  | 1.69264  | -0.34134 |
| H | 1.95990  | -0.28722 | -2.12106 |
| H | 3.16727  | -2.43137 | -0.97913 |
| H | 3.36512  | -1.84994 | 1.66071  |
| H | 2.27157  | 0.61135  | 1.96476  |
| H | 1.74493  | 2.53619  | 0.10010  |
| H | 1.15819  | 1.86934  | -1.41986 |
| C | -0.19479 | 1.59667  | 0.23519  |
| H | -0.13221 | 1.51914  | 1.32740  |
| H | -0.71939 | 2.53647  | 0.02641  |
| C | -0.98927 | 0.42659  | -0.30710 |
| H | -0.47357 | -0.51018 | -0.06012 |
| H | -1.01037 | 0.47501  | -1.40499 |
| C | -2.40639 | 0.37871  | 0.22527  |
| H | -2.38143 | 0.34005  | 1.32268  |

|   |          |          |          |
|---|----------|----------|----------|
| H | -2.92720 | 1.31271  | -0.02614 |
| C | -3.20432 | -0.79806 | -0.29956 |
| H | -3.22437 | -0.75823 | -1.39525 |
| H | -2.68107 | -1.72729 | -0.04565 |
| C | -4.61723 | -0.83430 | 0.24233  |
| H | -5.16331 | 0.07448  | -0.02541 |
| H | -5.18199 | -1.68531 | -0.14211 |
| H | -4.61612 | -0.90293 | 1.33361  |

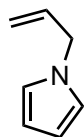

**N-allyl pyrrole**

M06/def2-TZVP Geometry

|   |          |          |          |
|---|----------|----------|----------|
| N | -0.15069 | -0.58649 | 0.00022  |
| C | -0.85561 | -0.21912 | -1.11209 |
| C | -2.02439 | 0.36581  | -0.70759 |
| C | -2.02438 | 0.36637  | 0.70732  |
| C | -0.85558 | -0.21824 | 1.11227  |
| C | 1.20707  | -1.06362 | 0.00040  |
| H | -0.45635 | -0.40516 | -2.09767 |
| H | -2.80209 | 0.73798  | -1.35545 |
| H | -2.80206 | 0.73905  | 1.35490  |
| H | -0.45630 | -0.40348 | 2.09798  |
| H | 1.34804  | -1.70897 | 0.87470  |
| H | 1.34804  | -1.70962 | -0.87342 |
| C | 2.23342  | 0.02373  | -0.00001 |
| C | 1.96918  | 1.31749  | -0.00051 |
| H | 2.76337  | 2.05312  | -0.00079 |
| H | 0.94929  | 1.69022  | -0.00066 |
| H | 3.26458  | -0.32215 | 0.00014  |

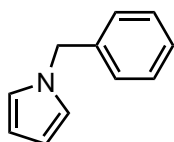

**N-Bn pyrrole**

M06/def2-TZVP Geometry

|   |          |          |          |
|---|----------|----------|----------|
| N | -1.54062 | -0.66211 | -0.00001 |
| C | -2.15296 | -0.15499 | -1.11225 |
| C | -3.17220 | 0.66336  | -0.70719 |
| C | -3.17218 | 0.66331  | 0.70728  |
| C | -2.15294 | -0.15506 | 1.11227  |
| C | -0.30918 | -1.40476 | -0.00005 |

|   |          |          |          |
|---|----------|----------|----------|
| H | -1.80265 | -0.42122 | -2.09807 |
| H | -3.85448 | 1.19086  | -1.35475 |
| H | -3.85446 | 1.19077  | 1.35489  |
| H | -1.80262 | -0.42136 | 2.09807  |
| H | -0.30505 | -2.06245 | 0.87560  |
| H | -0.30506 | -2.06239 | -0.87574 |
| C | 3.27660  | 0.95112  | 0.00001  |
| C | 2.04467  | 1.57956  | 0.00003  |
| C | 0.87611  | 0.83356  | 0.00002  |
| C | 0.93247  | -0.55139 | -0.00003 |
| C | 2.17366  | -1.17674 | -0.00005 |
| C | 3.33885  | -0.43367 | -0.00003 |
| H | 4.18819  | 1.53712  | 0.00002  |
| H | 1.98805  | 2.66201  | 0.00007  |
| H | -0.08723 | 1.33339  | 0.00004  |
| H | 2.22253  | -2.26242 | -0.00008 |
| H | 4.29967  | -0.93545 | -0.00005 |

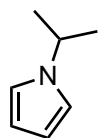

**N-iPr pyrrole**

M06/def2-TZVP Geometry

|   |          |          |          |
|---|----------|----------|----------|
| N | -0.12810 | -0.10024 | -0.15829 |
| C | -1.09131 | -0.98095 | -0.56169 |
| C | -2.31666 | -0.47484 | -0.22004 |
| C | -2.08909 | 0.76045  | 0.42582  |
| C | -0.73455 | 0.96157  | 0.45340  |
| C | 1.30643  | -0.33185 | -0.25636 |
| H | -0.81785 | -1.89520 | -1.06645 |
| H | -3.27015 | -0.93685 | -0.42121 |
| H | -2.83400 | 1.43341  | 0.82043  |
| H | -0.15672 | 1.77632  | 0.86118  |
| H | 1.41328  | -1.17493 | -0.94754 |
| C | 1.88084  | -0.72746 | 1.09005  |
| H | 2.94130  | -0.97227 | 1.00012  |
| H | 1.78294  | 0.09533  | 1.80309  |
| H | 1.35684  | -1.59338 | 1.49785  |
| C | 2.02019  | 0.86767  | -0.84339 |
| H | 1.57746  | 1.16408  | -1.79514 |
| H | 1.97445  | 1.72293  | -0.16467 |
| H | 3.07411  | 0.63474  | -1.00641 |

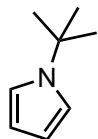

### N-tBu pyrrole

#### M06/def2-TZVP Geometry

|   |          |          |          |
|---|----------|----------|----------|
| N | 0.31949  | 0.02488  | -0.00000 |
| C | 1.10851  | -1.09503 | 0.00004  |
| C | 2.42127  | -0.71055 | 0.00002  |
| C | 2.44060  | 0.70023  | -0.00005 |
| C | 1.13876  | 1.12302  | -0.00006 |
| C | -1.15337 | -0.00070 | 0.00001  |
| H | 0.67677  | -2.08337 | 0.00009  |
| H | 3.27189  | -1.37387 | 0.00004  |
| H | 3.30874  | 1.34025  | -0.00008 |
| H | 0.74183  | 2.12380  | -0.00010 |
| C | -1.63549 | -0.72178 | 1.25098  |
| H | -2.72774 | -0.73402 | 1.28012  |
| H | -1.28662 | -1.75552 | 1.27794  |
| H | -1.26990 | -0.21604 | 2.14736  |
| C | -1.63550 | -0.72190 | -1.25089 |
| H | -1.26993 | -0.21625 | -2.14733 |
| H | -1.28664 | -1.75564 | -1.27775 |
| H | -2.72775 | -0.73414 | -1.28001 |
| C | -1.70111 | 1.41430  | -0.00006 |
| H | -1.38865 | 1.96750  | -0.88830 |
| H | -2.79174 | 1.37011  | -0.00005 |
| H | -1.38864 | 1.96759  | 0.88813  |

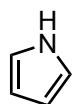

### Pyrrole

#### M06/def2-TZVP Geometry

|   |          |          |          |
|---|----------|----------|----------|
| N | -1.11554 | 0.00000  | -0.00000 |
| C | -0.32884 | 1.11598  | -0.00000 |
| C | 0.97627  | 0.70759  | -0.00000 |
| C | 0.97627  | -0.70759 | 0.00000  |
| C | -0.32885 | -1.11598 | 0.00000  |
| H | -0.75966 | 2.10408  | -0.00001 |
| H | 1.83894  | 1.35460  | -0.00000 |
| H | 1.83893  | -1.35461 | 0.00000  |
| H | -0.75967 | -2.10408 | 0.00000  |
| H | -2.11888 | 0.00000  | 0.00000  |

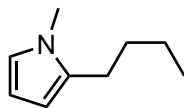

**N-Me 2-butyl pyrrole**

M06/def2-TZVP Geometry

|   |          |          |          |
|---|----------|----------|----------|
| N | 1.94693  | 0.52061  | 0.00000  |
| C | 2.95762  | -0.40385 | -0.00000 |
| C | 2.39978  | -1.65005 | -0.00001 |
| C | 0.99601  | -1.47759 | -0.00001 |
| C | 0.73793  | -0.12955 | -0.00000 |
| H | 3.98894  | -0.08604 | -0.00000 |
| H | 2.93831  | -2.58431 | -0.00002 |
| H | 0.25170  | -2.25882 | -0.00001 |
| C | 2.12603  | 1.94641  | 0.00001  |
| H | 1.67869  | 2.40549  | -0.88567 |
| H | 1.67869  | 2.40548  | 0.88570  |
| H | 3.19178  | 2.16996  | 0.00002  |
| C | -0.54236 | 0.62389  | 0.00000  |
| H | -0.58575 | 1.29201  | 0.87274  |
| H | -0.58575 | 1.29201  | -0.87272 |
| C | -1.77216 | -0.26054 | -0.00000 |
| H | -1.74850 | -0.92104 | -0.87538 |
| H | -1.74850 | -0.92104 | 0.87537  |
| C | -3.06364 | 0.53240  | 0.00000  |
| H | -3.08121 | 1.19395  | 0.87455  |
| H | -3.08121 | 1.19396  | -0.87454 |
| C | -4.28982 | -0.35507 | -0.00000 |
| H | -5.21472 | 0.22406  | 0.00000  |
| H | -4.30365 | -1.00309 | -0.88053 |
| H | -4.30365 | -1.00310 | 0.88051  |

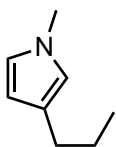

**N-Me 3-Pr pyrrole**

M06/def2-TZVP Geometry

|   |          |          |          |
|---|----------|----------|----------|
| N | -1.86763 | -0.14075 | 0.01662  |
| C | -1.58729 | 1.05332  | -0.58014 |
| C | -0.28745 | 1.38039  | -0.30242 |
| C | 0.25459  | 0.34191  | 0.49693  |
| C | -0.74520 | -0.57977 | 0.66498  |
| H | -2.34423 | 1.57367  | -1.14721 |
| H | 0.22215  | 2.27793  | -0.62045 |

|   |          |          |          |
|---|----------|----------|----------|
| C | -3.09935 | -0.87134 | -0.10423 |
| H | -3.05822 | -1.60892 | -0.91075 |
| H | -3.31775 | -1.39126 | 0.82961  |
| H | -3.91604 | -0.17914 | -0.30963 |
| H | -0.74715 | -1.51607 | 1.20438  |
| C | 1.64459  | 0.25702  | 1.02655  |
| H | 1.85372  | 1.12236  | 1.66549  |
| H | 1.72921  | -0.62694 | 1.67024  |
| C | 2.70453  | 0.17916  | -0.06700 |
| H | 2.63720  | 1.07506  | -0.69474 |
| H | 3.69630  | 0.20646  | 0.39614  |
| C | 2.56998  | -1.05922 | -0.92745 |
| H | 3.36393  | -1.12212 | -1.67386 |
| H | 2.61520  | -1.96506 | -0.31495 |
| H | 1.61270  | -1.06944 | -1.45395 |

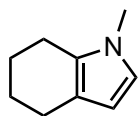

**N-Me dihydroindole**

M06/def2-TZVP Geometry

|   |          |          |          |
|---|----------|----------|----------|
| N | -1.61912 | -0.20190 | 0.02344  |
| C | -1.98550 | 1.11710  | -0.01418 |
| C | -0.85240 | 1.88191  | -0.06039 |
| C | 0.25233  | 0.99576  | -0.05072 |
| C | -0.25161 | -0.27850 | -0.00355 |
| H | -3.02847 | 1.39448  | -0.00228 |
| H | -0.81849 | 2.96047  | -0.08975 |
| C | -2.51522 | -1.32357 | 0.06560  |
| H | -3.53757 | -0.96013 | 0.16025  |
| H | -2.44762 | -1.92686 | -0.84430 |
| H | -2.29933 | -1.96912 | 0.92087  |
| C | 1.71842  | 1.26730  | -0.06910 |
| H | 2.04371  | 1.54965  | -1.07941 |
| H | 1.96393  | 2.11887  | 0.57315  |
| C | 2.48500  | 0.02830  | 0.37770  |
| H | 3.55555  | 0.16060  | 0.19993  |
| H | 2.35911  | -0.10472 | 1.45957  |
| C | 1.98460  | -1.22034 | -0.33386 |
| H | 2.62230  | -2.07728 | -0.10255 |
| H | 2.05108  | -1.06034 | -1.41687 |
| C | 0.53794  | -1.53441 | 0.03390  |
| H | 0.50033  | -1.98720 | 1.03560  |
| H | 0.12802  | -2.28635 | -0.65067 |

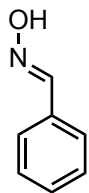

**OH imine**

M06/def2-TZVP Geometry

|   |          |          |          |
|---|----------|----------|----------|
| N | 2.28360  | -0.47405 | -0.00000 |
| C | 1.43326  | 0.46803  | -0.00000 |
| C | 0.00000  | 0.20872  | 0.00000  |
| O | 3.57447  | 0.00788  | -0.00000 |
| C | -0.52136 | -1.08494 | 0.00000  |
| C | -1.88607 | -1.28413 | 0.00000  |
| C | -2.75418 | -0.20065 | 0.00000  |
| C | -2.24680 | 1.08605  | 0.00000  |
| C | -0.87782 | 1.28800  | 0.00000  |
| H | 1.76794  | 1.50904  | -0.00000 |
| H | 4.11001  | -0.79087 | -0.00000 |
| H | 0.16138  | -1.92623 | -0.00000 |
| H | -2.28200 | -2.29313 | 0.00000  |
| H | -3.82565 | -0.36306 | 0.00000  |
| H | -2.91828 | 1.93661  | 0.00000  |
| H | -0.47645 | 2.29653  | 0.00000  |

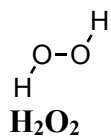

M06/def2-TZVP Geometry

|   |          |          |          |
|---|----------|----------|----------|
| O | 0.00000  | 0.71060  | -0.05745 |
| H | -0.79283 | 0.89892  | 0.45962  |
| O | -0.00000 | -0.71060 | -0.05745 |
| H | 0.79283  | -0.89892 | 0.45962  |

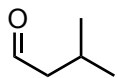

**Carbonyl 15**

M06/def2-TZVP Geometry

|   |          |          |          |
|---|----------|----------|----------|
| C | -0.30471 | -0.82361 | 0.40585  |
| C | 0.72902  | 0.04273  | -0.29014 |
| C | -1.73486 | -0.43176 | 0.20325  |
| O | -2.12264 | 0.42724  | -0.53475 |

|   |          |          |          |
|---|----------|----------|----------|
| C | 2.08232  | -0.64302 | -0.27115 |
| H | -0.11627 | -0.86358 | 1.48879  |
| H | -0.23152 | -1.87085 | 0.07776  |
| H | 0.40849  | 0.17247  | -1.33053 |
| C | 0.81637  | 1.41318  | 0.35772  |
| H | -2.45925 | -1.03754 | 0.79904  |
| H | 2.05275  | -1.61529 | -0.76926 |
| H | 2.41479  | -0.80710 | 0.75962  |
| H | 2.84088  | -0.03363 | -0.76729 |
| H | 1.55230  | 2.03980  | -0.15085 |
| H | -0.14149 | 1.93414  | 0.33468  |
| H | 1.13151  | 1.31848  | 1.40289  |

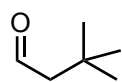

**Carbonyl 16**

M06/def2-TZVP Geometry

|   |          |          |          |
|---|----------|----------|----------|
| C | 0.41069  | 1.03128  | 0.00007  |
| C | -0.70050 | -0.01581 | 0.00009  |
| C | 1.83998  | 0.58466  | -0.00022 |
| O | 2.24517  | -0.54180 | -0.00030 |
| C | -0.62125 | -0.88309 | -1.24999 |
| H | 0.30333  | 1.70015  | 0.86748  |
| H | 0.30308  | 1.70038  | -0.86713 |
| C | -0.62130 | -0.88307 | 1.25019  |
| C | -2.03043 | 0.72784  | 0.00006  |
| H | 2.55870  | 1.44055  | 0.00006  |
| H | 0.30361  | -1.45970 | -1.28075 |
| H | -0.67546 | -0.26922 | -2.15463 |
| H | -1.46053 | -1.58371 | -1.27551 |
| H | -2.86444 | 0.02090  | 0.00004  |
| H | -2.13009 | 1.36334  | 0.88519  |
| H | -2.13005 | 1.36335  | -0.88507 |
| H | -1.46062 | -1.58364 | 1.27572  |
| H | 0.30353  | -1.45973 | 1.28097  |
| H | -0.67548 | -0.26918 | 2.15481  |

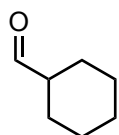

**Carbonyl 64**

M06/def2-TZVP Geometry

|   |          |          |         |
|---|----------|----------|---------|
| C | -0.11006 | -1.01537 | 0.97068 |
| C | -0.67187 | 0.38574  | 0.78754 |



|   |          |          |          |
|---|----------|----------|----------|
| C | 0.42653  | 1.41241  | 0.52119  |
| C | 1.30868  | 0.99060  | -0.64160 |
| C | 1.89915  | -0.38835 | -0.40158 |
| C | 0.80399  | -1.41696 | -0.17664 |
| C | -1.73411 | 0.46572  | -0.27631 |
| O | -2.27622 | -0.46230 | -0.80132 |
| H | 0.45769  | -1.03800 | 1.90861  |
| H | -0.92911 | -1.73096 | 1.07319  |
| H | -1.20234 | 0.69244  | 1.70286  |
| H | -0.01827 | 2.39625  | 0.33562  |
| H | 1.03924  | 1.51303  | 1.42416  |
| H | 0.71340  | 0.97227  | -1.56518 |
| H | 2.09915  | 1.72890  | -0.80072 |
| H | 2.53415  | -0.68380 | -1.24109 |
| H | 2.54975  | -0.34857 | 0.48266  |
| H | 1.23815  | -2.40009 | 0.02362  |
| H | 0.21077  | -1.52232 | -1.09174 |
| H | -2.01666 | 1.51651  | -0.54101 |

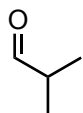

**Carbonyl 65**

M06/def2-TZVP Geometry

|   |          |          |          |
|---|----------|----------|----------|
| C | 1.10665  | -1.25156 | 0.04386  |
| C | 0.34011  | -0.00006 | -0.35429 |
| C | 1.10519  | 1.25234  | 0.04384  |
| C | -0.98806 | -0.00088 | 0.34687  |
| O | -2.06123 | -0.00031 | -0.17819 |
| H | 2.09710  | -1.25563 | -0.41550 |
| H | 1.24677  | -1.28671 | 1.12912  |
| H | 0.14169  | -0.00019 | -1.43037 |
| H | 1.24525  | 1.28768  | 1.12910  |
| H | -0.89152 | 0.00055  | 1.46531  |
| H | 0.58707  | -2.16233 | -0.25915 |
| H | 0.58454  | 2.16250  | -0.25919 |
| H | 2.09564  | 1.25758  | -0.41550 |

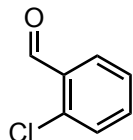

**Carbonyl 66**

M06/def2-TZVP Geometry

|   |         |         |         |
|---|---------|---------|---------|
| C | 1.54750 | 1.24040 | 0.00054 |
|---|---------|---------|---------|

|    |          |          |          |
|----|----------|----------|----------|
| O  | 1.73107  | 2.42707  | -0.00060 |
| H  | 2.39622  | 0.52725  | -0.00069 |
| C  | -2.37555 | -0.42333 | -0.00019 |
| C  | -1.28929 | -1.27793 | -0.00016 |
| C  | -0.00914 | -0.75273 | 0.00006  |
| C  | 0.20321  | 0.62360  | 0.00026  |
| C  | -0.90973 | 1.46176  | 0.00022  |
| C  | -2.18917 | 0.95127  | 0.00000  |
| H  | -3.37695 | -0.83788 | -0.00036 |
| H  | -1.42281 | -2.35247 | -0.00031 |
| Cl | 1.32096  | -1.87291 | 0.00008  |
| H  | -0.72528 | 2.53034  | 0.00038  |
| H  | -3.04318 | 1.61742  | -0.00002 |

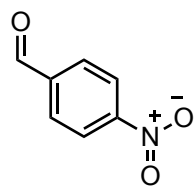

**Carbonyl 67**

M06/def2-TZVP Geometry

|   |          |          |          |
|---|----------|----------|----------|
| C | -3.16536 | 0.33114  | -0.00000 |
| O | -3.92187 | -0.59730 | 0.00001  |
| H | -3.53400 | 1.38314  | 0.00001  |
| C | 1.03544  | 0.01039  | -0.00002 |
| C | 0.46596  | 1.26806  | -0.00002 |
| C | -0.91251 | 1.35926  | -0.00001 |
| C | -1.69145 | 0.21020  | -0.00001 |
| C | -1.09123 | -1.04488 | -0.00001 |
| C | 0.28269  | -1.15148 | -0.00002 |
| H | 1.10182  | 2.14267  | -0.00002 |
| H | -1.39561 | 2.33114  | -0.00001 |
| H | -1.72350 | -1.92500 | -0.00001 |
| H | 0.78414  | -2.10967 | -0.00002 |
| N | 2.51085  | -0.09927 | -0.00003 |
| O | 2.98427  | -1.21115 | 0.00004  |
| O | 3.14384  | 0.93051  | 0.00005  |

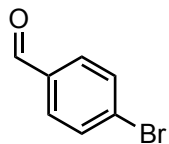

**Carbonyl 69**

M06/def2-TZVP Geometry

|   |          |         |         |
|---|----------|---------|---------|
| C | -3.56875 | 0.30545 | 0.00000 |
|---|----------|---------|---------|

|    |          |          |          |
|----|----------|----------|----------|
| O  | -4.32231 | -0.62798 | 0.00000  |
| H  | -3.94747 | 1.35499  | -0.00001 |
| C  | 0.64952  | 0.03599  | -0.00000 |
| C  | 0.05010  | 1.28343  | -0.00001 |
| C  | -1.33000 | 1.35770  | -0.00001 |
| C  | -2.10011 | 0.20301  | 0.00000  |
| C  | -1.47809 | -1.04170 | 0.00001  |
| C  | -0.10282 | -1.13078 | 0.00001  |
| H  | 0.65896  | 2.17865  | -0.00002 |
| H  | -1.82193 | 2.32585  | -0.00002 |
| H  | -2.09646 | -1.93229 | 0.00002  |
| H  | 0.39410  | -2.09297 | 0.00002  |
| Br | 2.53349  | -0.08254 | -0.00000 |

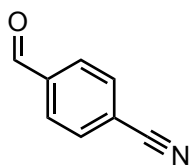

**Carbonyl 70**

M06/def2-TZVP Geometry

|   |          |          |          |
|---|----------|----------|----------|
| C | -2.77911 | 0.32910  | 0.00001  |
| O | -3.54164 | -0.59500 | 0.00000  |
| H | -3.14211 | 1.38335  | 0.00005  |
| C | 1.44778  | -0.01420 | -0.00000 |
| C | 0.85510  | 1.24537  | 0.00002  |
| C | -0.52127 | 1.34524  | 0.00002  |
| C | -1.30745 | 0.20144  | 0.00001  |
| C | -0.71160 | -1.05577 | -0.00001 |
| C | 0.66019  | -1.16697 | -0.00002 |
| H | 1.47984  | 2.12978  | 0.00003  |
| H | -0.99903 | 2.31991  | 0.00003  |
| H | -1.34805 | -1.93303 | -0.00002 |
| H | 1.14036  | -2.13774 | -0.00003 |
| N | 4.01690  | -0.22003 | -0.00001 |
| C | 2.87034  | -0.12790 | -0.00001 |

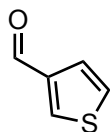

**Carbonyl 71**

M06/def2-TZVP Geometry

|   |         |          |          |
|---|---------|----------|----------|
| C | 2.02630 | -0.51987 | 0.00009  |
| O | 2.92921 | 0.27243  | -0.00007 |
| H | 2.21901 | -1.61847 | 0.00001  |

|   |          |          |          |
|---|----------|----------|----------|
| S | -1.92923 | -0.37494 | 0.00019  |
| C | -0.39095 | -1.09880 | -0.00006 |
| C | 0.60861  | -0.16459 | 0.00001  |
| C | 0.10762  | 1.16436  | -0.00009 |
| C | -1.24570 | 1.20395  | -0.00026 |
| H | -0.28026 | -2.17380 | -0.00005 |
| H | 0.75200  | 2.03316  | -0.00014 |
| H | -1.89208 | 2.06841  | -0.00042 |

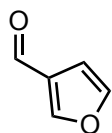

**Carbonyl 72**

M06/def2-TZVP Geometry

|   |          |          |          |
|---|----------|----------|----------|
| C | 1.72281  | 0.44733  | -0.00002 |
| O | 2.57832  | -0.39652 | -0.00002 |
| H | 1.97937  | 1.53238  | -0.00002 |
| O | -1.89639 | 0.51780  | 0.00000  |
| C | -0.69556 | 1.10509  | 0.00003  |
| C | 0.29507  | 0.17372  | -0.00000 |
| C | -0.36129 | -1.09613 | 0.00002  |
| C | -1.67927 | -0.82719 | -0.00001 |
| H | -0.67933 | 2.18400  | 0.00004  |
| H | 0.11767  | -2.06138 | 0.00002  |
| H | -2.56365 | -1.44218 | -0.00002 |

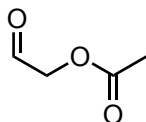

**Carbonyl 73**

M06/def2-TZVP Geometry

|   |          |          |          |
|---|----------|----------|----------|
| C | 1.94333  | -0.15149 | 0.04984  |
| O | 1.65356  | -1.28063 | -0.19965 |
| C | 1.02800  | 1.02507  | -0.13809 |
| O | -0.21528 | 0.65684  | -0.67272 |
| C | -1.07402 | 0.08372  | 0.20262  |
| C | -2.27750 | -0.42993 | -0.51032 |
| O | -0.86185 | 0.01690  | 1.37676  |
| H | 2.94664  | 0.13056  | 0.44626  |
| H | 1.49284  | 1.72466  | -0.83906 |
| H | 0.92267  | 1.53660  | 0.82579  |
| H | -2.66713 | 0.31846  | -1.20009 |
| H | -1.98738 | -1.30003 | -1.10218 |
| H | -3.03805 | -0.71938 | 0.20991  |

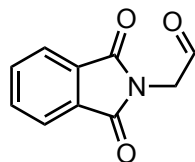

**Carbonyl 74**

M06/def2-TZVP Geometry

|   |          |          |          |
|---|----------|----------|----------|
| C | 3.20682  | 0.00003  | 0.64936  |
| O | 2.61142  | 0.00020  | 1.68255  |
| C | 2.54452  | -0.00011 | -0.70621 |
| N | 1.12010  | -0.00008 | -0.61261 |
| C | 0.37117  | -1.16182 | -0.40214 |
| C | -1.00889 | -0.69257 | -0.13024 |
| C | -1.00886 | 0.69256  | -0.13029 |
| C | 0.37120  | 1.16172  | -0.40239 |
| C | -2.15762 | -1.41256 | 0.10527  |
| C | -3.32296 | -0.69465 | 0.34357  |
| C | -3.32292 | 0.69478  | 0.34355  |
| C | -2.15754 | 1.41262  | 0.10522  |
| O | 0.80536  | 2.27800  | -0.45005 |
| O | 0.80523  | -2.27813 | -0.44993 |
| H | 4.31958  | -0.00002 | 0.60835  |
| H | 2.87798  | 0.88364  | -1.25900 |
| H | 2.87795  | -0.88399 | -1.25880 |
| H | -2.14233 | -2.49605 | 0.10604  |
| H | -4.24866 | -1.22412 | 0.53555  |
| H | -4.24859 | 1.22431  | 0.53550  |
| H | -2.14220 | 2.49611  | 0.10590  |

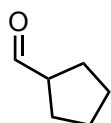

**Carbonyl 75**

M06/def2-TZVP Geometry

|   |          |          |          |
|---|----------|----------|----------|
| C | 1.68305  | 0.31776  | 0.06944  |
| O | 2.14190  | -0.44477 | -0.72955 |
| C | 0.38143  | 0.16064  | 0.80784  |
| C | -0.57306 | 1.27027  | 0.32173  |
| C | -1.35277 | 0.58678  | -0.78895 |
| C | -1.64322 | -0.78129 | -0.19281 |
| C | -0.33951 | -1.16170 | 0.51572  |
| H | 2.20891  | 1.27444  | 0.30922  |
| H | 0.61502  | 0.30197  | 1.86876  |
| H | -1.24986 | 1.55666  | 1.13179  |

|   |          |          |          |
|---|----------|----------|----------|
| H | -0.04630 | 2.17549  | 0.00594  |
| H | -0.71747 | 0.47994  | -1.67587 |
| H | -2.24764 | 1.13510  | -1.08808 |
| H | -2.45782 | -0.69084 | 0.53368  |
| H | -1.95319 | -1.52059 | -0.93287 |
| H | 0.29230  | -1.76847 | -0.13727 |
| H | -0.51471 | -1.74022 | 1.42326  |

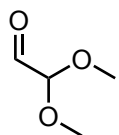

**Carbonyl 76**

M06/def2-TZVP Geometry

|   |          |          |          |
|---|----------|----------|----------|
| C | -1.21754 | -1.03618 | -0.14192 |
| O | -2.31830 | -0.59898 | -0.01073 |
| C | 0.03775  | -0.37575 | 0.41845  |
| O | -0.09567 | 0.96705  | 0.70301  |
| O | 1.05645  | -0.67629 | -0.47783 |
| C | 2.33853  | -0.36575 | 0.00846  |
| C | -0.35293 | 1.79471  | -0.41224 |
| H | -1.00799 | -1.99938 | -0.66102 |
| H | 0.23856  | -0.85317 | 1.39693  |
| H | 3.06143  | -0.71520 | -0.72722 |
| H | 2.46757  | 0.71122  | 0.15631  |
| H | 2.52652  | -0.87100 | 0.96473  |
| H | -1.30218 | 1.54355  | -0.89326 |
| H | -0.40989 | 2.81473  | -0.03618 |
| H | 0.45133  | 1.73278  | -1.15238 |

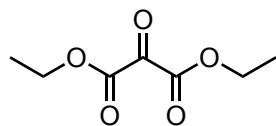

**Carbonyl 77**

M06/def2-TZVP Geometry

|   |          |          |          |
|---|----------|----------|----------|
| O | -0.00001 | 1.83834  | -0.00000 |
| C | -0.00000 | 0.64659  | 0.00000  |
| C | -1.21558 | -0.19373 | -0.38528 |
| C | 1.21558  | -0.19372 | 0.38530  |
| O | 2.33606  | 0.28836  | -0.11189 |
| O | -2.33606 | 0.28836  | 0.11189  |
| O | -1.09799 | -1.13372 | -1.11757 |
| O | 1.09800  | -1.13370 | 1.11758  |
| C | 3.53924  | -0.40333 | 0.26314  |

|   |          |          |          |
|---|----------|----------|----------|
| C | 4.68322  | 0.26286  | -0.43895 |
| C | -3.53924 | -0.40334 | -0.26315 |
| C | -4.68322 | 0.26287  | 0.43893  |
| H | 3.63657  | -0.36102 | 1.35123  |
| H | 3.43510  | -1.45605 | -0.01282 |
| H | 4.56044  | 0.21007  | -1.52148 |
| H | 4.75736  | 1.31302  | -0.15381 |
| H | 5.61939  | -0.23116 | -0.17610 |
| H | -3.63655 | -0.36103 | -1.35123 |
| H | -3.43511 | -1.45605 | 0.01283  |
| H | -4.75735 | 1.31302  | 0.15377  |
| H | -5.61939 | -0.23115 | 0.17606  |
| H | -4.56046 | 0.21009  | 1.52145  |

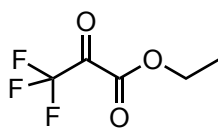

**Carbonyl 78**

M06/def2-TZVP Geometry

|   |          |          |          |
|---|----------|----------|----------|
| O | -0.45341 | 1.81723  | -0.00019 |
| C | -0.56921 | 0.63618  | 0.00003  |
| C | -1.96891 | -0.03200 | -0.00000 |
| C | 0.61888  | -0.33975 | 0.00004  |
| O | 1.75664  | 0.32315  | 0.00010  |
| O | 0.48196  | -1.52760 | -0.00012 |
| C | 2.94935  | -0.48026 | 0.00004  |
| C | 4.12360  | 0.45012  | 0.00011  |
| F | -2.12102 | -0.78512 | -1.07968 |
| F | -2.12094 | -0.78532 | 1.07956  |
| F | -2.90744 | 0.89215  | 0.00012  |
| H | 2.92923  | -1.12885 | 0.87999  |
| H | 2.92923  | -1.12871 | -0.88001 |
| H | 5.05098  | -0.12374 | 0.00007  |
| H | 4.11572  | 1.08902  | -0.88372 |
| H | 4.11572  | 1.08889  | 0.88404  |

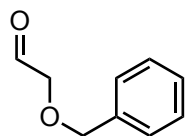

**Carbonyl 79**

M06/def2-TZVP Geometry

|   |          |         |         |
|---|----------|---------|---------|
| C | 0.88878  | 0.70699 | 0.07198 |
| C | -0.30230 | 1.61586 | 0.16319 |

|   |          |          |          |
|---|----------|----------|----------|
| O | -1.47487 | 0.95678  | 0.57935  |
| C | 1.29616  | -0.01266 | 1.18975  |
| C | 2.38503  | -0.86080 | 1.11962  |
| C | 3.08366  | -0.99756 | -0.07073 |
| C | 2.68394  | -0.28790 | -1.18850 |
| C | 1.58731  | 0.55675  | -1.11579 |
| C | -1.93787 | 0.01540  | -0.33993 |
| C | -3.24849 | -0.53552 | 0.14505  |
| O | -3.89946 | -1.32356 | -0.47260 |
| H | -0.13014 | 2.40075  | 0.90499  |
| H | -0.46929 | 2.10671  | -0.80828 |
| H | 0.74342  | 0.09631  | 2.11767  |
| H | 2.69538  | -1.41636 | 1.99700  |
| H | 3.93878  | -1.66102 | -0.12509 |
| H | 3.22265  | -0.39578 | -2.12267 |
| H | 1.26646  | 1.10847  | -1.99453 |
| H | -1.23662 | -0.82361 | -0.47295 |
| H | -2.09043 | 0.45848  | -1.33812 |
| H | -3.56293 | -0.14311 | 1.14008  |

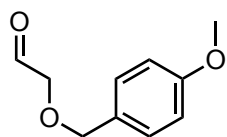

**Carbonyl 80**

M06/def2-TZVP Geometry

|   |          |          |          |
|---|----------|----------|----------|
| C | 0.10201  | -1.05472 | -0.23641 |
| C | 1.45192  | -1.64875 | -0.49786 |
| O | 2.49915  | -0.96435 | 0.15479  |
| C | -0.65848 | -0.50574 | -1.25134 |
| C | -1.90225 | 0.06053  | -1.00509 |
| C | -2.39355 | 0.08593  | 0.29214  |
| C | -1.63221 | -0.45620 | 1.32753  |
| C | -0.40573 | -1.01698 | 1.06156  |
| C | 2.68185  | 0.33864  | -0.30498 |
| C | 3.88703  | 0.92909  | 0.36929  |
| O | 4.31972  | 2.01273  | 0.11357  |
| O | -3.58464 | 0.60891  | 0.64987  |
| C | -4.39119 | 1.16862  | -0.35153 |
| H | 1.50456  | -2.67543 | -0.12529 |
| H | 1.64135  | -1.67672 | -1.58238 |
| H | -0.27437 | -0.51628 | -2.26746 |
| H | -2.46970 | 0.47906  | -1.82568 |
| H | -2.03590 | -0.42520 | 2.33264  |
| H | 0.18450  | -1.43428 | 1.87166  |
| H | 2.83765  | 0.37147  | -1.39638 |



|   |          |         |          |
|---|----------|---------|----------|
| H | 1.81543  | 0.98542 | -0.09335 |
| H | 4.34570  | 0.26415 | 1.13766  |
| H | -4.66790 | 0.42764 | -1.11003 |
| H | -5.29474 | 1.52667 | 0.13845  |
| H | -3.89674 | 2.01259 | -0.84555 |

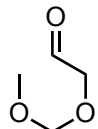

### Carbonyl 111

M06/def2-TZVP Geometry

|   |          |          |          |
|---|----------|----------|----------|
| C | -1.52603 | -0.49962 | -0.25558 |
| C | -1.12016 | 0.94664  | -0.11020 |
| O | -2.46868 | -0.97190 | 0.30490  |
| O | 0.18408  | 1.22060  | -0.53984 |
| C | 1.15416  | 0.90707  | 0.41124  |
| O | 1.27247  | -0.45358 | 0.64697  |
| C | 1.94369  | -1.14413 | -0.37875 |
| H | -0.89786 | -1.08528 | -0.96683 |
| H | -1.28554 | 1.25343  | 0.93210  |
| H | -1.80019 | 1.53593  | -0.73559 |
| H | 0.90093  | 1.36239  | 1.37816  |
| H | 2.09390  | 1.32867  | 0.03081  |
| H | 1.44043  | -1.03050 | -1.34553 |
| H | 2.97583  | -0.78601 | -0.47979 |
| H | 1.95953  | -2.19928 | -0.10976 |

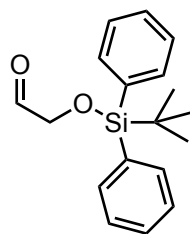

### Carbonyl 112

M06/def2-TZVP Geometry

|    |          |          |          |
|----|----------|----------|----------|
| C  | 2.25736  | -1.67184 | -2.40840 |
| C  | 0.83204  | -1.23939 | -2.21881 |
| O  | 2.95605  | -2.14400 | -1.56359 |
| O  | 0.33331  | -1.52898 | -0.96616 |
| Si | -0.10693 | -0.42442 | 0.18508  |
| C  | 1.14691  | 0.96988  | 0.18176  |
| C  | -1.81099 | 0.22138  | -0.25322 |
| C  | -0.15552 | -1.40930 | 1.79298  |
| C  | -0.57801 | -0.50850 | 2.94829  |

|   |          |          |          |
|---|----------|----------|----------|
| C | 1.21613  | -2.00444 | 2.09522  |
| C | -1.16888 | -2.54006 | 1.63499  |
| C | -2.51778 | -0.35380 | -1.30899 |
| C | -3.79541 | 0.06934  | -1.63791 |
| C | -4.39827 | 1.07952  | -0.90936 |
| C | -3.72092 | 1.65999  | 0.15049  |
| C | -2.44436 | 1.23331  | 0.47235  |
| C | 2.50969  | 0.67012  | 0.28109  |
| C | 3.46705  | 1.66947  | 0.27069  |
| C | 3.08386  | 2.99623  | 0.16130  |
| C | 1.74238  | 3.31606  | 0.04943  |
| C | 0.78779  | 2.31203  | 0.05514  |
| H | 2.62316  | -1.50658 | -3.45074 |
| H | 0.79447  | -0.16422 | -2.47146 |
| H | 0.23985  | -1.74010 | -3.00178 |
| H | -1.59603 | -0.12946 | 2.82104  |
| H | -0.55746 | -1.07493 | 3.88709  |
| H | 0.09394  | 0.34813  | 3.06743  |
| H | 1.59359  | -2.60741 | 1.26483  |
| H | 1.95457  | -1.22866 | 2.31572  |
| H | 1.14931  | -2.65022 | 2.97932  |
| H | -0.88692 | -3.22404 | 0.83031  |
| H | -1.22288 | -3.12165 | 2.56335  |
| H | -2.17367 | -2.16241 | 1.42297  |
| H | -2.06334 | -1.15878 | -1.87908 |
| H | -4.32334 | -0.39385 | -2.46389 |
| H | -5.39783 | 1.41281  | -1.16390 |
| H | -4.19042 | 2.44731  | 0.72930  |
| H | -1.93332 | 1.69951  | 1.31062  |
| H | 2.83067  | -0.36502 | 0.34660  |
| H | 4.51710  | 1.41077  | 0.34600  |
| H | 3.83277  | 3.78007  | 0.15535  |
| H | 1.43671  | 4.35157  | -0.04916 |
| H | -0.25722 | 2.58279  | -0.05541 |

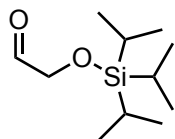

### Carbonyl 113

M06/def2-TZVP Geometry

|   |          |          |          |
|---|----------|----------|----------|
| C | -3.40009 | -0.10068 | 0.71329  |
| C | -2.22937 | -0.48239 | -0.15720 |
| O | -4.53617 | -0.13918 | 0.34890  |
| O | -1.04686 | -0.41993 | 0.56928  |

|    |          |          |          |
|----|----------|----------|----------|
| Si | 0.43724  | 0.04565  | -0.01369 |
| C  | 0.23991  | 1.73579  | -0.82848 |
| C  | 1.54187  | 0.14751  | 1.51106  |
| C  | 1.05938  | -1.22402 | -1.26286 |
| C  | 1.57481  | 2.29400  | -1.30659 |
| C  | -0.45676 | 2.72676  | 0.09460  |
| C  | 3.01815  | -0.03600 | 1.17353  |
| C  | 1.12728  | -0.80885 | 2.62279  |
| C  | 0.32197  | -1.15994 | -2.59518 |
| C  | 0.98949  | -2.63417 | -0.68754 |
| H  | -3.10279 | 0.22886  | 1.73813  |
| H  | -2.41709 | -1.49353 | -0.54722 |
| H  | -2.24070 | 0.19121  | -1.02901 |
| H  | -0.39783 | 1.58669  | -1.71135 |
| H  | 1.40967  | 1.17216  | 1.88796  |
| H  | 2.11469  | -0.97956 | -1.44844 |
| H  | 1.44035  | 3.24421  | -1.83292 |
| H  | 2.24107  | 2.49097  | -0.46028 |
| H  | 2.09646  | 1.61309  | -1.98529 |
| H  | -0.61352 | 3.68827  | -0.40449 |
| H  | -1.43166 | 2.36782  | 0.43486  |
| H  | 0.14415  | 2.92516  | 0.98774  |
| H  | 3.64232  | 0.13999  | 2.05511  |
| H  | 3.22253  | -1.05726 | 0.83754  |
| H  | 3.36304  | 0.64077  | 0.38722  |
| H  | 0.09570  | -0.64939 | 2.93814  |
| H  | 1.21072  | -1.85216 | 2.30376  |
| H  | 1.77427  | -0.68599 | 3.49743  |
| H  | 0.72010  | -1.89939 | -3.29747 |
| H  | -0.74305 | -1.38362 | -2.47428 |
| H  | 0.40005  | -0.18018 | -3.07256 |
| H  | 1.34724  | -3.37342 | -1.41146 |
| H  | 1.58789  | -2.74660 | 0.21990  |
| H  | -0.04053 | -2.90247 | -0.43133 |

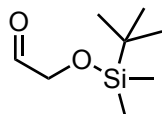

**Carbonyl 114**

M06/def2-TZVP Geometry

|   |         |          |          |
|---|---------|----------|----------|
| C | 3.12797 | -0.44569 | -0.14452 |
| C | 2.26668 | 0.55611  | -0.86107 |
| O | 2.73202 | -1.42820 | 0.40551  |
| O | 0.93749 | 0.21150  | -0.93110 |

|    |          |          |          |
|----|----------|----------|----------|
| Si | -0.22490 | 0.62070  | 0.18299  |
| C  | -1.64212 | -0.57539 | -0.13708 |
| C  | -0.72353 | 2.39553  | -0.11491 |
| C  | 0.44847  | 0.48118  | 1.91602  |
| C  | -1.19375 | -1.99439 | 0.19673  |
| C  | -2.05480 | -0.51040 | -1.60363 |
| C  | -2.83302 | -0.19869 | 0.73793  |
| H  | 4.21373  | -0.18221 | -0.17048 |
| H  | 2.44839  | 1.53189  | -0.37181 |
| H  | 2.68598  | 0.66733  | -1.87290 |
| H  | 0.14647  | 3.05496  | -0.04883 |
| H  | -1.17071 | 2.53374  | -1.10140 |
| H  | -1.44294 | 2.73272  | 0.63540  |
| H  | 0.80877  | -0.52568 | 2.13173  |
| H  | 1.27872  | 1.17578  | 2.07350  |
| H  | -0.32472 | 0.73842  | 2.64472  |
| H  | -0.94457 | -2.10461 | 1.25608  |
| H  | -1.99959 | -2.70454 | -0.02635 |
| H  | -0.31503 | -2.28830 | -0.38323 |
| H  | -2.39605 | 0.48916  | -1.89006 |
| H  | -2.88422 | -1.20382 | -1.78990 |
| H  | -1.23228 | -0.78909 | -2.26668 |
| H  | -3.65533 | -0.90676 | 0.57860  |
| H  | -2.58538 | -0.22482 | 1.80387  |
| H  | -3.21411 | 0.80010  | 0.50380  |

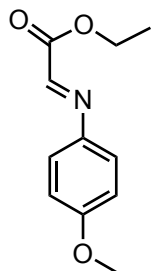

### Imine

#### M06/def2-TZVP Geometry

|   |          |          |          |
|---|----------|----------|----------|
| C | -1.43108 | -0.96840 | -0.18958 |
| N | -0.69491 | 0.03341  | 0.02705  |
| C | 0.69598  | -0.07140 | 0.05522  |
| C | -2.91657 | -0.88763 | -0.18475 |
| O | -3.38415 | 0.33578  | 0.03199  |
| O | -3.59939 | -1.86167 | -0.36406 |
| C | -4.80752 | 0.46300  | 0.04424  |
| C | -5.13177 | 1.90565  | 0.29574  |
| C | 1.42240  | 1.08566  | -0.19284 |

|   |          |          |          |
|---|----------|----------|----------|
| C | 2.80542  | 1.08120  | -0.20636 |
| C | 3.48802  | -0.09735 | 0.07030  |
| C | 2.76944  | -1.25791 | 0.35850  |
| C | 1.39638  | -1.24676 | 0.34625  |
| O | 4.82963  | -0.21457 | 0.10127  |
| C | 5.60414  | 0.92515  | -0.16435 |
| H | -1.06890 | -1.98072 | -0.40969 |
| H | -5.20455 | 0.11128  | -0.91256 |
| H | -5.21655 | -0.19299 | 0.81828  |
| H | -4.72513 | 2.23471  | 1.25305  |
| H | -4.71389 | 2.54054  | -0.48685 |
| H | -6.21298 | 2.04952  | 0.31395  |
| H | 0.87183  | 1.99779  | -0.39134 |
| H | 3.33872  | 1.99801  | -0.41944 |
| H | 3.32343  | -2.15740 | 0.59963  |
| H | 0.85574  | -2.15269 | 0.59593  |
| H | 6.64580  | 0.61835  | -0.09184 |
| H | 5.41726  | 1.31523  | -1.17097 |
| H | 5.41580  | 1.72085  | 0.56480  |

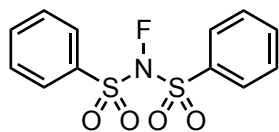

**NFSI**

M06/def2-TZVP Geometry

|   |          |          |          |
|---|----------|----------|----------|
| N | -0.22231 | 0.87037  | -0.41966 |
| F | -0.29094 | 0.38686  | -1.71937 |
| S | 1.35637  | 1.60324  | -0.19093 |
| S | -0.74828 | -0.44568 | 0.59378  |
| O | 1.23782  | 2.26867  | 1.05461  |
| O | 1.57421  | 2.28522  | -1.41554 |
| O | -0.19006 | -1.66126 | 0.10928  |
| O | -0.51323 | 0.02193  | 1.91493  |
| C | -2.46066 | -0.40194 | 0.22077  |
| C | 2.45975  | 0.24966  | -0.06155 |
| C | 2.80698  | -0.22213 | 1.19521  |
| C | 3.63057  | -1.32851 | 1.28323  |
| C | 4.08637  | -1.94812 | 0.13109  |
| C | 3.73388  | -1.46304 | -1.11829 |
| C | 2.91623  | -0.35444 | -1.22383 |
| C | -3.25201 | 0.55224  | 0.84242  |
| C | -4.60283 | 0.58217  | 0.55685  |
| C | -5.14224 | -0.32840 | -0.33936 |
| C | -4.33857 | -1.27269 | -0.95597 |

|   |          |          |          |
|---|----------|----------|----------|
| C | -2.98385 | -1.31455 | -0.67957 |
| H | 2.42757  | 0.27204  | 2.08077  |
| H | 3.91469  | -1.71050 | 2.25599  |
| H | 4.72692  | -2.81893 | 0.20739  |
| H | 4.09924  | -1.94957 | -2.01428 |
| H | 2.63213  | 0.04669  | -2.18869 |
| H | -2.80611 | 1.25181  | 1.53933  |
| H | -5.23832 | 1.31763  | 1.03459  |
| H | -6.20297 | -0.30010 | -0.55954 |
| H | -4.76735 | -1.97984 | -1.65535 |
| H | -2.33208 | -2.04253 | -1.14621 |

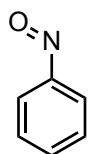

**PhNO**

M06/def2-TZVP Geometry

|   |          |          |         |
|---|----------|----------|---------|
| O | -1.33252 | 2.38174  | 0.00000 |
| N | -0.19009 | 2.01603  | 0.00000 |
| C | -0.00000 | 0.59011  | 0.00000 |
| C | -1.04771 | -0.32210 | 0.00000 |
| C | -0.75869 | -1.66913 | 0.00000 |
| C | 0.56490  | -2.09702 | 0.00000 |
| C | 1.60468  | -1.18236 | 0.00000 |
| C | 1.32036  | 0.17083  | 0.00000 |
| H | -2.06557 | 0.05030  | 0.00000 |
| H | -1.56019 | -2.39874 | 0.00000 |
| H | 0.78364  | -3.15888 | 0.00000 |
| H | 2.63204  | -1.52606 | 0.00000 |
| H | 2.09960  | 0.92526  | 0.00000 |

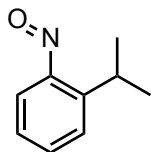

**PhNO 2-ipr**

M06/def2-TZVP Geometry

|   |          |          |          |
|---|----------|----------|----------|
| C | -0.29445 | 1.61160  | -0.00002 |
| C | -0.36207 | 0.21998  | -0.00002 |
| C | 0.85213  | -0.47396 | -0.00000 |
| C | 2.07732  | 0.19020  | 0.00001  |
| C | 2.11374  | 1.56264  | 0.00000  |
| C | 0.91690  | 2.27283  | -0.00001 |

|   |          |          |          |
|---|----------|----------|----------|
| N | 0.78685  | -1.90837 | 0.00001  |
| O | 1.84559  | -2.47642 | 0.00003  |
| C | -1.70003 | -0.47602 | -0.00002 |
| C | -2.49358 | -0.13686 | -1.25412 |
| C | -2.49352 | -0.13696 | 1.25414  |
| H | -1.21285 | 2.18892  | -0.00003 |
| H | 2.98047  | -0.40871 | 0.00002  |
| H | 3.06059  | 2.08927  | 0.00001  |
| H | 0.93415  | 3.35693  | -0.00001 |
| H | -1.51160 | -1.55111 | -0.00007 |
| H | -1.93707 | -0.38760 | -2.15937 |
| H | -3.43364 | -0.69301 | -1.26885 |
| H | -2.74044 | 0.92780  | -1.29674 |
| H | -1.93697 | -0.38780 | 2.15934  |
| H | -2.74036 | 0.92770  | 1.29687  |
| H | -3.43359 | -0.69310 | 1.26885  |

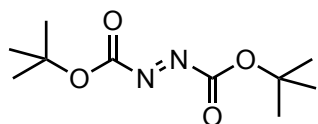

**tBu diimide**

M06/def2-TZVP Geometry

|   |          |          |          |
|---|----------|----------|----------|
| N | -0.30330 | -0.24072 | 0.47594  |
| N | 0.30326  | 0.23997  | -0.47554 |
| C | 1.63674  | 0.67314  | -0.12770 |
| O | 2.45165  | -0.35140 | -0.19563 |
| O | 1.86210  | 1.82194  | 0.09658  |
| C | -1.63692 | -0.67358 | 0.12821  |
| O | -2.45158 | 0.35118  | 0.19603  |
| O | -1.86243 | -1.82222 | -0.09665 |
| C | 3.89858  | -0.18906 | 0.01031  |
| C | -3.89849 | 0.18929  | -0.01045 |
| C | -4.46454 | -0.73086 | 1.04847  |
| C | -4.15765 | -0.31065 | -1.41456 |
| C | -4.41931 | 1.59741  | 0.16481  |
| C | 4.15801  | 0.31165  | 1.41409  |
| C | 4.46410  | 0.73071  | -1.04923 |
| C | 4.41971  | -1.59713 | -0.16440 |
| H | -4.19987 | -0.37244 | 2.04560  |
| H | -5.55385 | -0.73469 | 0.96843  |
| H | -4.10706 | -1.75265 | 0.93086  |
| H | -3.67080 | 0.33916  | -2.14483 |
| H | -3.80100 | -1.33018 | -1.55289 |
| H | -5.23289 | -0.29024 | -1.60560 |
| H | -4.18829 | 1.97191  | 1.16357  |

|   |          |          |          |
|---|----------|----------|----------|
| H | -3.96927 | 2.26789  | -0.56931 |
| H | -5.50253 | 1.60912  | 0.03013  |
| H | 3.67154  | -0.33791 | 2.14483  |
| H | 5.23331  | 0.29163  | 1.60484  |
| H | 3.80111  | 1.33116  | 1.55201  |
| H | 4.19923  | 0.37174  | -2.04610 |
| H | 4.10641  | 1.75247  | -0.93202 |
| H | 5.55344  | 0.73484  | -0.96952 |
| H | 3.97005  | -2.26736 | 0.57018  |
| H | 4.18849  | -1.97219 | -1.16291 |
| H | 5.50297  | -1.60851 | -0.03003 |

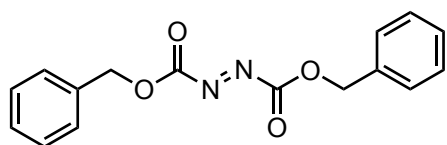

### Bn diimide

#### M06/def2-TZVP Geometry

|   |          |          |          |
|---|----------|----------|----------|
| N | 0.20206  | -0.49840 | -0.50606 |
| N | -0.17673 | 0.38211  | 0.26025  |
| C | -1.24777 | 1.17484  | -0.28714 |
| O | -2.39827 | 0.56409  | -0.09484 |
| O | -1.05299 | 2.25023  | -0.75765 |
| C | 1.27491  | -1.28982 | 0.04151  |
| O | 2.41372  | -0.63662 | -0.06065 |
| O | 1.09235  | -2.39554 | 0.44135  |
| C | -3.56461 | 1.29700  | -0.51940 |
| C | 3.58105  | -1.35737 | 0.37944  |
| H | -3.47381 | 1.47609  | -1.59522 |
| H | -3.57301 | 2.27028  | -0.02302 |
| C | -7.06093 | -0.97776 | 0.38949  |
| C | -6.04579 | -1.53690 | -0.37182 |
| C | -4.91284 | -0.80184 | -0.66253 |
| C | -4.77721 | 0.49730  | -0.18734 |
| C | -5.79303 | 1.04728  | 0.57883  |
| C | -6.93436 | 0.31545  | 0.86297  |
| H | -7.95053 | -1.55416 | 0.61474  |
| H | -6.14086 | -2.55084 | -0.74218 |
| H | -4.11584 | -1.23773 | -1.25579 |
| H | -5.68791 | 2.05870  | 0.95821  |
| H | -7.72264 | 0.75576  | 1.46209  |
| H | 3.67268  | -2.27649 | -0.20454 |
| H | 3.42392  | -1.64505 | 1.42356  |
| C | 7.02095  | 1.13748  | -0.03353 |
| C | 5.91286  | 1.59051  | 0.66605  |



|   |         |          |          |
|---|---------|----------|----------|
| C | 4.79783 | 0.78509  | 0.79490  |
| C | 4.77385 | -0.47886 | 0.21733  |
| C | 5.88234 | -0.92236 | -0.48686 |
| C | 7.00532 | -0.12026 | -0.60829 |
| H | 7.89607 | 1.76901  | -0.13191 |
| H | 5.92063 | 2.57672  | 1.11508  |
| H | 3.92857 | 1.13857  | 1.33930  |
| H | 5.86488 | -1.90543 | -0.94649 |
| H | 7.86654 | -0.47755 | -1.16045 |

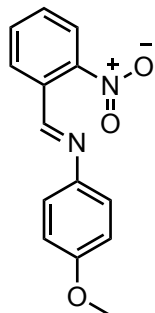

**Imine a**

M06/def2-TZVP Geometry

|   |          |          |          |
|---|----------|----------|----------|
| C | -0.77086 | -0.11542 | 0.14427  |
| N | 0.16524  | -0.87564 | -0.24376 |
| C | 1.49266  | -0.44950 | -0.16376 |
| C | 2.47741  | -1.41168 | 0.01304  |
| C | 3.81333  | -1.06564 | 0.11380  |
| C | 4.18744  | 0.26777  | -0.00214 |
| C | 3.21133  | 1.23742  | -0.22251 |
| C | 1.88449  | 0.88613  | -0.29902 |
| C | -2.17170 | -0.54072 | 0.03780  |
| C | -2.46165 | -1.90275 | -0.02016 |
| C | -3.76146 | -2.36251 | -0.05483 |
| C | -4.82233 | -1.47000 | -0.01378 |
| C | -4.56965 | -0.11566 | 0.05245  |
| C | -3.26098 | 0.33144  | 0.06225  |
| O | 5.45923  | 0.71491  | 0.06353  |
| C | 6.48287  | -0.22224 | 0.26167  |
| H | -0.57919 | 0.85961  | 0.60035  |
| H | 2.17343  | -2.44957 | 0.08604  |
| H | 4.55224  | -1.84061 | 0.26912  |
| H | 3.52762  | 2.26673  | -0.34385 |
| H | 1.13942  | 1.64781  | -0.50408 |
| H | -1.62404 | -2.58938 | -0.02801 |
| H | -3.95193 | -3.42808 | -0.10453 |
| H | -5.84408 | -1.82802 | -0.03653 |
| H | -5.37052 | 0.61085  | 0.08024  |

|   |          |          |          |
|---|----------|----------|----------|
| H | 7.41730  | 0.33553  | 0.28553  |
| H | 6.36462  | -0.75755 | 1.21065  |
| H | 6.52643  | -0.95353 | -0.55341 |
| N | -3.07013 | 1.79278  | 0.04586  |
| O | -3.93391 | 2.47246  | 0.54994  |
| O | -2.07312 | 2.22593  | -0.49231 |

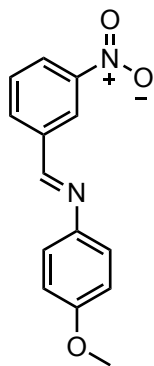

**Imine b**

M06/def2-TZVP Geometry

|   |          |          |          |
|---|----------|----------|----------|
| C | -0.31809 | -0.03020 | 0.01169  |
| N | 0.65589  | 0.77278  | 0.11298  |
| C | 1.97557  | 0.32053  | 0.11406  |
| C | 2.95466  | 1.18688  | -0.35395 |
| C | 4.28641  | 0.81525  | -0.40074 |
| C | 4.66550  | -0.43902 | 0.06209  |
| C | 3.69740  | -1.30347 | 0.56970  |
| C | 2.37432  | -0.93148 | 0.59232  |
| C | -1.70712 | 0.42125  | 0.05457  |
| C | -2.03079 | 1.76696  | 0.23126  |
| C | -3.34844 | 2.17585  | 0.26528  |
| C | -4.37291 | 1.25298  | 0.12685  |
| C | -4.04055 | -0.07578 | -0.04532 |
| C | -2.72978 | -0.50678 | -0.08422 |
| O | 5.93371  | -0.89821 | 0.07887  |
| C | 6.94994  | -0.05935 | -0.40121 |
| H | -0.18186 | -1.11308 | -0.13081 |
| H | 2.64650  | 2.16693  | -0.69946 |
| H | 5.01883  | 1.51170  | -0.78688 |
| H | 4.01799  | -2.26438 | 0.95456  |
| H | 1.64027  | -1.60607 | 1.01879  |
| H | -1.22030 | 2.47802  | 0.33974  |
| H | -3.58739 | 3.22338  | 0.40222  |
| H | -5.41426 | 1.54371  | 0.15091  |
| H | 7.88336  | -0.61020 | -0.30132 |
| H | 6.79960  | 0.19652  | -1.45607 |

|   |          |          |          |
|---|----------|----------|----------|
| H | 7.01954  | 0.86652  | 0.18079  |
| H | -2.51692 | -1.55986 | -0.22256 |
| N | -5.12042 | -1.06956 | -0.19279 |
| O | -4.79769 | -2.22661 | -0.33773 |
| O | -6.25983 | -0.66486 | -0.15934 |

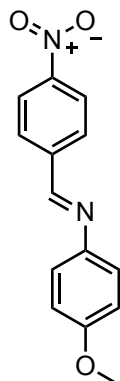

**Imine c**

M06/def2-TZVP Geometry

|   |          |          |          |
|---|----------|----------|----------|
| C | -0.11360 | 0.56271  | 0.10182  |
| N | 0.72163  | -0.36882 | -0.09914 |
| C | 2.09477  | -0.13016 | -0.10214 |
| C | 2.93132  | -1.18583 | 0.23736  |
| C | 4.30564  | -1.03532 | 0.27727  |
| C | 4.87202  | 0.18728  | -0.06355 |
| C | 4.04556  | 1.24359  | -0.44406 |
| C | 2.68027  | 1.08891  | -0.45956 |
| C | -1.55557 | 0.33705  | 0.06683  |
| C | -2.08618 | -0.92250 | -0.21386 |
| C | -3.44876 | -1.11531 | -0.23769 |
| C | -4.28115 | -0.03800 | 0.01907  |
| C | -3.78707 | 1.22088  | 0.29844  |
| C | -2.41874 | 1.39997  | 0.32049  |
| O | 6.19589  | 0.44129  | -0.07533 |
| C | 7.07481  | -0.59344 | 0.27849  |
| H | 0.19418  | 1.59396  | 0.33264  |
| H | 2.47600  | -2.13694 | 0.48802  |
| H | 4.92390  | -1.87616 | 0.56228  |
| H | 4.50930  | 2.17809  | -0.73713 |
| H | 2.05662  | 1.91315  | -0.78729 |
| H | -1.40313 | -1.73972 | -0.41060 |
| H | -3.88396 | -2.08201 | -0.45195 |
| H | 8.08161  | -0.18649 | 0.20599  |
| H | 6.90326  | -0.93700 | 1.30469  |
| H | 6.98709  | -1.44872 | -0.40069 |
| H | -2.00561 | 2.37921  | 0.53861  |
| H | -4.47439 | 2.03274  | 0.49299  |

|   |          |          |          |
|---|----------|----------|----------|
| N | -5.73945 | -0.24037 | -0.00694 |
| O | -6.14459 | -1.35398 | -0.25280 |
| O | -6.44130 | 0.71959  | 0.21958  |

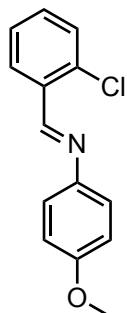

**Imine d**

M06/def2-TZVP Geometry

|    |          |          |          |
|----|----------|----------|----------|
| C  | -0.93143 | 0.05129  | -0.00227 |
| N  | -0.00161 | -0.80595 | 0.09779  |
| C  | 1.33673  | -0.41348 | 0.11804  |
| C  | 2.27999  | -1.30622 | -0.37391 |
| C  | 3.62755  | -0.99311 | -0.40182 |
| C  | 4.05941  | 0.22667  | 0.10433  |
| C  | 3.12776  | 1.11570  | 0.63568  |
| C  | 1.78880  | 0.80263  | 0.63985  |
| C  | -2.33960 | -0.33907 | 0.02484  |
| C  | -3.37840 | 0.58211  | -0.10976 |
| C  | -4.70514 | 0.18835  | -0.08203 |
| C  | -5.01820 | -1.14683 | 0.08128  |
| C  | -4.00515 | -2.08514 | 0.21755  |
| C  | -2.68920 | -1.68082 | 0.19029  |
| O  | 5.34844  | 0.62797  | 0.14252  |
| C  | 6.32728  | -0.24014 | -0.36023 |
| H  | -0.72908 | 1.12113  | -0.12978 |
| H  | 1.93089  | -2.25960 | -0.75352 |
| H  | 4.33023  | -1.70880 | -0.80773 |
| H  | 3.48815  | 2.04835  | 1.05367  |
| H  | 1.08191  | 1.49460  | 1.08396  |
| Cl | -3.05317 | 2.28077  | -0.32033 |
| H  | -5.48102 | 0.93581  | -0.18990 |
| H  | 6.35124  | -1.18724 | 0.19077  |
| H  | 7.28478  | 0.26320  | -0.23850 |
| H  | 6.17187  | -0.45481 | -1.42370 |
| H  | -1.87928 | -2.39312 | 0.29574  |
| H  | -4.24733 | -3.13311 | 0.34652  |
| H  | -6.05724 | -1.45346 | 0.10257  |

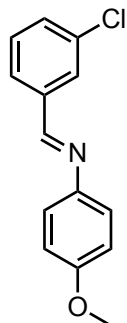

**Imine e**

M06/def2-TZVP Geometry

|    |          |          |          |
|----|----------|----------|----------|
| C  | -0.56635 | 0.88819  | -0.12817 |
| N  | 0.17130  | -0.13029 | 0.02237  |
| C  | 1.56091  | -0.01510 | 0.06832  |
| C  | 2.31636  | -1.08578 | -0.39122 |
| C  | 3.69950  | -1.04706 | -0.39184 |
| C  | 4.35573  | 0.07036  | 0.10968  |
| C  | 3.60970  | 1.13511  | 0.60960  |
| C  | 2.23520  | 1.09455  | 0.58645  |
| C  | -2.02464 | 0.81250  | -0.13365 |
| C  | -2.68070 | -0.40227 | 0.05409  |
| C  | -4.05707 | -0.43428 | 0.03932  |
| C  | -4.80724 | 0.71646  | -0.15645 |
| C  | -4.15268 | 1.92002  | -0.34102 |
| C  | -2.77014 | 1.96982  | -0.33010 |
| O  | 5.69773  | 0.20788  | 0.17215  |
| C  | 6.49390  | -0.84647 | -0.29640 |
| H  | -0.15178 | 1.89701  | -0.28179 |
| H  | 1.79205  | -1.95687 | -0.76691 |
| H  | 4.25373  | -1.89477 | -0.77269 |
| H  | 4.14027  | 1.98339  | 1.02596  |
| H  | 1.67108  | 1.91915  | 1.00807  |
| H  | -2.10014 | -1.30345 | 0.20825  |
| Cl | -4.87974 | -1.94664 | 0.27278  |
| H  | 6.31991  | -1.04469 | -1.36016 |
| H  | 6.31791  | -1.76936 | 0.26787  |
| H  | 7.52980  | -0.54135 | -0.15943 |
| H  | -2.25547 | 2.91392  | -0.47563 |
| H  | -4.72915 | 2.82439  | -0.49468 |
| H  | -5.88840 | 0.65819  | -0.16160 |

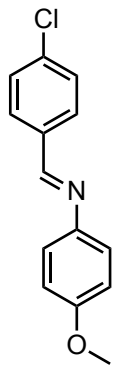

**Imine f**

M06/def2-TZVP Geometry

|    |          |          |          |
|----|----------|----------|----------|
| C  | -0.41219 | 0.49760  | 0.13267  |
| N  | 0.42473  | -0.41604 | -0.13350 |
| C  | 1.79629  | -0.16063 | -0.12165 |
| C  | 2.64901  | -1.20115 | 0.22270  |
| C  | 4.02087  | -1.02620 | 0.27060  |
| C  | 4.56886  | 0.20558  | -0.06579 |
| C  | 3.72714  | 1.24633  | -0.45061 |
| C  | 2.36358  | 1.06724  | -0.47527 |
| C  | -1.85402 | 0.28623  | 0.08536  |
| C  | -2.71183 | 1.32870  | 0.42039  |
| C  | -4.08342 | 1.16208  | 0.38968  |
| C  | -4.59865 | -0.06601 | 0.01828  |
| C  | -3.76499 | -1.12203 | -0.32121 |
| C  | -2.39977 | -0.94158 | -0.28727 |
| O  | 5.89112  | 0.48210  | -0.06885 |
| C  | 6.78181  | -0.53875 | 0.29018  |
| H  | -0.09813 | 1.50936  | 0.43507  |
| H  | 2.21003  | -2.16078 | 0.47035  |
| H  | 4.65150  | -1.85674 | 0.55922  |
| H  | 4.17553  | 2.18947  | -0.74025 |
| H  | 1.72582  | 1.87912  | -0.80704 |
| H  | -2.29408 | 2.28750  | 0.71121  |
| H  | -4.75347 | 1.97154  | 0.65024  |
| H  | 6.60888  | -0.88660 | 1.31505  |
| H  | 7.78352  | -0.11761 | 0.22527  |
| H  | 6.71224  | -1.39570 | -0.38951 |
| H  | -1.72659 | -1.74969 | -0.54823 |
| H  | -4.19668 | -2.07257 | -0.60908 |
| Cl | -6.31745 | -0.29214 | -0.02561 |

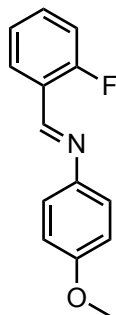

**Imine g**

M06/def2-TZVP Geometry

|   |          |          |          |
|---|----------|----------|----------|
| C | 1.12085  | 0.25072  | 0.04840  |
| N | 0.23171  | -0.63859 | -0.12018 |
| C | -1.12215 | -0.30112 | -0.12598 |
| C | -2.03071 | -1.25367 | 0.31635  |
| C | -3.38961 | -0.99475 | 0.35425  |
| C | -3.86797 | 0.23116  | -0.09161 |
| C | -2.97089 | 1.18096  | -0.57431 |
| C | -1.62048 | 0.92061  | -0.58851 |
| C | 2.54375  | -0.06867 | 0.00732  |
| C | 3.50435  | 0.91269  | 0.22221  |
| C | 4.85739  | 0.64885  | 0.19196  |
| C | 5.27857  | -0.64308 | -0.06113 |
| C | 4.34817  | -1.65024 | -0.28050 |
| C | 3.00076  | -1.36240 | -0.24706 |
| O | -5.17195 | 0.58373  | -0.11400 |
| C | -6.11645 | -0.34473 | 0.34410  |
| H | 0.86808  | 1.29930  | 0.24872  |
| H | -1.64572 | -2.21072 | 0.64918  |
| H | -4.06478 | -1.75666 | 0.72098  |
| H | -3.36636 | 2.11870  | -0.94676 |
| H | -0.93996 | 1.66056  | -0.99499 |
| F | 3.11189  | 2.16368  | 0.46783  |
| H | 5.55588  | 1.45752  | 0.36715  |
| H | -5.95186 | -0.60612 | 1.39571  |
| H | -6.10535 | -1.26357 | -0.25331 |
| H | -7.09254 | 0.12732  | 0.24687  |
| H | 2.25600  | -2.13111 | -0.41653 |
| H | 4.68097  | -2.66160 | -0.47937 |
| H | 6.33884  | -0.86455 | -0.08779 |

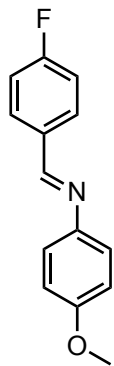

**Imine h**

M06/def2-TZVP Geometry

|   |          |          |          |
|---|----------|----------|----------|
| C | 0.86943  | 0.45661  | 0.13184  |
| N | 0.02265  | -0.44621 | -0.13990 |
| C | -1.34596 | -0.17393 | -0.12509 |
| C | -2.21157 | -1.20114 | 0.22671  |
| C | -3.58106 | -1.00791 | 0.27638  |
| C | -4.11371 | 0.22911  | -0.06511 |
| C | -3.25934 | 1.25649  | -0.45693 |
| C | -1.89807 | 1.05916  | -0.48391 |
| C | 2.30910  | 0.23361  | 0.08218  |
| C | 3.17575  | 1.26700  | 0.42405  |
| C | 4.54629  | 1.09000  | 0.39142  |
| C | 5.03879  | -0.14038 | 0.01077  |
| C | 4.20691  | -1.19028 | -0.33605 |
| C | 2.84336  | -0.99712 | -0.29952 |
| O | -5.43279 | 0.52293  | -0.06667 |
| C | -6.33531 | -0.48458 | 0.29943  |
| H | 0.56462  | 1.46926  | 0.44150  |
| H | -1.78496 | -2.16527 | 0.47852  |
| H | -4.22189 | -1.82866 | 0.57058  |
| H | -3.69579 | 2.20410  | -0.75028 |
| H | -1.25012 | 1.86064  | -0.82128 |
| H | 2.76445  | 2.22643  | 0.72150  |
| H | 5.23428  | 1.88353  | 0.65440  |
| H | -6.27828 | -1.34591 | -0.37599 |
| H | -6.16456 | -0.82966 | 1.32567  |
| H | -7.33186 | -0.05126 | 0.23470  |
| H | 2.16104  | -1.79596 | -0.56492 |
| H | 4.64285  | -2.13746 | -0.62887 |
| F | 6.35514  | -0.32550 | -0.02554 |



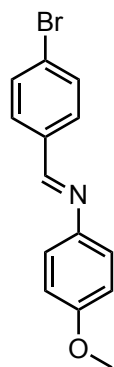

**Imine i**

M06/def2-TZVP Geometry

|    |          |          |          |
|----|----------|----------|----------|
| C  | -0.41012 | 0.53609  | 0.14140  |
| N  | -1.23604 | -0.38795 | -0.12295 |
| C  | -2.61055 | -0.14925 | -0.11516 |
| C  | -3.45130 | -1.20123 | 0.22386  |
| C  | -4.82541 | -1.04387 | 0.26677  |
| C  | -5.38770 | 0.18157  | -0.06930 |
| C  | -4.55774 | 1.23388  | -0.44848 |
| C  | -3.19202 | 1.07218  | -0.46822 |
| C  | 1.03426  | 0.34034  | 0.09607  |
| C  | 1.88001  | 1.39499  | 0.42294  |
| C  | 3.25388  | 1.24379  | 0.39108  |
| C  | 3.78340  | 0.01942  | 0.02767  |
| C  | 2.96116  | -1.04848 | -0.30218 |
| C  | 1.59342  | -0.88377 | -0.26798 |
| O  | -6.71321 | 0.44115  | -0.07731 |
| C  | -7.59243 | -0.59216 | 0.27458  |
| H  | -0.73562 | 1.54544  | 0.43951  |
| H  | -3.00106 | -2.15575 | 0.47100  |
| H  | -5.44652 | -1.88301 | 0.55109  |
| H  | -5.01699 | 2.17186  | -0.73786 |
| H  | -2.56355 | 1.89293  | -0.79587 |
| H  | 1.45162  | 2.35106  | 0.70744  |
| H  | 3.91032  | 2.06644  | 0.64534  |
| H  | -7.50846 | -1.44613 | -0.40722 |
| H  | -7.41991 | -0.94067 | 1.29927  |
| H  | -8.59914 | -0.18376 | 0.20600  |
| H  | 0.92948  | -1.70161 | -0.52243 |
| H  | 3.39815  | -1.99851 | -0.58401 |
| Br | 5.65962  | -0.20436 | -0.02375 |

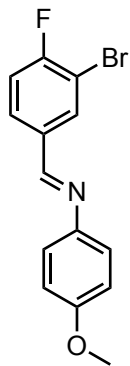

**Imine j**

M06/def2-TZVP Geometry

|    |          |          |          |
|----|----------|----------|----------|
| C  | 0.40830  | 1.08965  | -0.10429 |
| N  | 1.08178  | 0.02195  | -0.00248 |
| C  | 2.47551  | 0.05318  | 0.05824  |
| C  | 3.17477  | -1.02427 | -0.46913 |
| C  | 4.55795  | -1.06242 | -0.45912 |
| C  | 5.27038  | -0.02023 | 0.12169  |
| C  | 4.57954  | 1.04784  | 0.68896  |
| C  | 3.20505  | 1.08558  | 0.65491  |
| C  | -1.05048 | 1.10475  | -0.12117 |
| C  | -1.78416 | -0.07204 | 0.01310  |
| C  | -3.16092 | -0.04097 | -0.00853 |
| C  | -3.81549 | 1.17498  | -0.16394 |
| C  | -3.10623 | 2.35007  | -0.29690 |
| C  | -1.72578 | 2.31058  | -0.27476 |
| O  | 6.61731  | 0.03736  | 0.20149  |
| C  | 7.35874  | -1.02439 | -0.33512 |
| H  | 0.88515  | 2.07763  | -0.20417 |
| H  | 2.60732  | -1.83732 | -0.90707 |
| H  | 5.06783  | -1.91161 | -0.89454 |
| H  | 5.15191  | 1.83495  | 1.16569  |
| H  | 2.68288  | 1.90937  | 1.12897  |
| H  | -1.25584 | -1.01030 | 0.13396  |
| Br | -4.16138 | -1.62565 | 0.17249  |
| H  | 7.12559  | -1.97349 | 0.16081  |
| H  | 7.18571  | -1.13698 | -1.41149 |
| H  | 8.40842  | -0.78841 | -0.16961 |
| H  | -1.15799 | 3.22913  | -0.37923 |
| H  | -3.65244 | 3.27755  | -0.41591 |
| F  | -5.13712 | 1.21564  | -0.18476 |

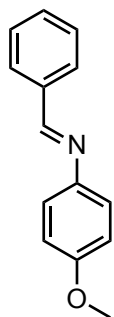

**Imine k**

M06/def2-TZVP Geometry

|   |          |          |          |
|---|----------|----------|----------|
| C | 1.32949  | 0.41246  | 0.12913  |
| N | 0.47070  | -0.47826 | -0.14491 |
| C | -0.89392 | -0.18767 | -0.12746 |
| C | -1.77264 | -1.20421 | 0.22304  |
| C | -3.13940 | -0.99306 | 0.27506  |
| C | -3.65604 | 0.25160  | -0.06311 |
| C | -2.78880 | 1.26852  | -0.45377 |
| C | -1.43024 | 1.05345  | -0.48274 |
| C | 2.76763  | 0.17220  | 0.07789  |
| C | 3.64272  | 1.19838  | 0.41966  |
| C | 5.01128  | 1.00008  | 0.38320  |
| C | 5.51786  | -0.23066 | 0.00376  |
| C | 4.65228  | -1.26106 | -0.33936 |
| C | 3.28783  | -1.06348 | -0.30444 |
| O | -4.97139 | 0.56268  | -0.06242 |
| C | -5.88623 | -0.43371 | 0.30298  |
| H | 1.03723  | 1.42777  | 0.44235  |
| H | -1.35824 | -2.17441 | 0.47187  |
| H | -3.79071 | -1.80590 | 0.56827  |
| H | -3.21315 | 2.22245  | -0.74442 |
| H | -0.77196 | 1.84701  | -0.81874 |
| H | 3.23802  | 2.16097  | 0.71732  |
| H | -5.84129 | -1.29450 | -0.37411 |
| H | -5.71858 | -0.78307 | 1.32831  |
| H | -6.87727 | 0.01247  | 0.24049  |
| H | 2.59696  | -1.85528 | -0.56937 |
| H | 5.05099  | -2.22410 | -0.63670 |
| H | 5.68373  | 1.80636  | 0.65149  |
| H | 6.58946  | -0.39038 | -0.02618 |

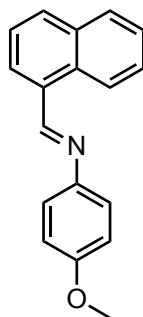

**Imine I**

M06/def2-TZVP Geometry

|   |          |          |          |
|---|----------|----------|----------|
| C | -0.32983 | 0.81766  | 0.16700  |
| N | 0.33396  | -0.26252 | 0.10770  |
| C | 1.72945  | -0.22631 | 0.09381  |
| C | 2.42206  | -1.24798 | 0.74713  |
| C | 3.79559  | -1.27038 | 0.76902  |
| C | 4.52590  | -0.28660 | 0.10526  |
| C | 3.85316  | 0.71503  | -0.58069 |
| C | 2.46678  | 0.74051  | -0.57881 |
| C | -1.78250 | 0.95631  | 0.13478  |
| C | -2.25081 | 2.24521  | 0.27429  |
| C | -3.61572 | 2.55105  | 0.27076  |
| C | -4.52656 | 1.54795  | 0.12337  |
| O | 5.87135  | -0.40287 | 0.16981  |
| C | 6.64957  | 0.56208  | -0.48230 |
| H | 0.19017  | 1.78436  | 0.27279  |
| H | 1.84841  | -2.01746 | 1.25084  |
| H | 4.33794  | -2.05233 | 1.28731  |
| H | 4.39466  | 1.47295  | -1.13171 |
| H | 1.95122  | 1.50812  | -1.14546 |
| H | -1.52867 | 3.04682  | 0.39311  |
| H | 7.69072  | 0.29956  | -0.30252 |
| H | 6.46743  | 0.56866  | -1.56328 |
| H | 6.46381  | 1.56795  | -0.08804 |
| H | -3.93890 | 3.57859  | 0.38549  |
| H | -5.59065 | 1.76116  | 0.11834  |
| C | -4.11004 | 0.20882  | -0.02792 |
| C | -2.72326 | -0.11071 | -0.02601 |
| C | -2.35721 | -1.46394 | -0.18695 |
| C | -3.30686 | -2.43682 | -0.33665 |
| C | -4.67252 | -2.11856 | -0.33417 |
| C | -5.06124 | -0.81991 | -0.18330 |
| H | -1.30666 | -1.71564 | -0.18763 |
| H | -2.99822 | -3.46869 | -0.45965 |
| H | -5.41259 | -2.90131 | -0.45307 |
| H | -6.11304 | -0.55259 | -0.18069 |

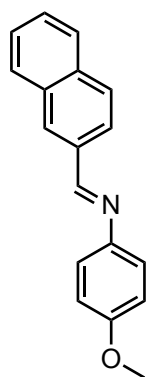

### Imine m

#### M06/def2-TZVP Geometry

|   |          |          |          |
|---|----------|----------|----------|
| C | 0.00387  | -0.22606 | 0.02937  |
| N | -0.91062 | 0.63893  | -0.12419 |
| C | -2.25503 | 0.26569  | -0.12026 |
| C | -3.18444 | 1.17801  | 0.36177  |
| C | -4.53481 | 0.87869  | 0.40864  |
| C | -4.98445 | -0.34668 | -0.06765 |
| C | -4.06741 | -1.25531 | -0.58942 |
| C | -2.72493 | -0.95552 | -0.61245 |
| C | 1.42124  | 0.10398  | -0.01704 |
| C | 1.85739  | 1.42872  | -0.26013 |
| C | 3.18455  | 1.71934  | -0.29972 |
| O | -6.27874 | -0.73573 | -0.08436 |
| C | -7.24258 | 0.15274  | 0.41060  |
| H | -0.22155 | -1.28656 | 0.22528  |
| H | -2.82285 | 2.13571  | 0.71818  |
| H | -5.22620 | 1.60987  | 0.80642  |
| H | -4.44089 | -2.19255 | -0.98521 |
| H | -2.02853 | -1.66228 | -1.05008 |
| H | 1.10544  | 2.19381  | -0.41135 |
| H | -7.26302 | 1.08867  | -0.15948 |
| H | -8.20673 | -0.34264 | 0.30981  |
| H | -7.07349 | 0.38800  | 1.46773  |
| H | 3.51962  | 2.73485  | -0.48578 |
| C | 2.35144  | -0.88562 | 0.17738  |
| H | 2.02198  | -1.90461 | 0.36438  |
| C | 4.16114  | 0.71509  | -0.10243 |
| C | 3.73252  | -0.61562 | 0.14117  |
| C | 4.70166  | -1.62054 | 0.33870  |
| C | 6.03385  | -1.32445 | 0.29717  |
| C | 6.45798  | -0.00642 | 0.05550  |
| C | 5.54159  | 0.98839  | -0.13942 |

|   |         |          |          |
|---|---------|----------|----------|
| H | 4.36678 | -2.63594 | 0.52492  |
| H | 6.76968 | -2.10505 | 0.45050  |
| H | 7.51776 | 0.21805  | 0.02445  |
| H | 5.86472 | 2.00742  | -0.32629 |

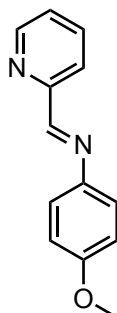

**Imine n**

M06/def2-TZVP Geometry

|   |          |          |          |
|---|----------|----------|----------|
| C | 1.34786  | -0.43552 | 0.12781  |
| N | 0.48690  | 0.45615  | -0.13337 |
| C | -0.87861 | 0.16811  | -0.11564 |
| C | -1.75389 | 1.20544  | 0.17708  |
| C | -3.12222 | 1.00508  | 0.22862  |
| C | -3.64217 | -0.25236 | -0.05196 |
| C | -2.77709 | -1.29296 | -0.38390 |
| C | -1.41803 | -1.08741 | -0.41203 |
| C | 2.78796  | -0.17057 | 0.07337  |
| N | 3.57345  | -1.20433 | 0.37949  |
| C | 4.88399  | -1.01925 | 0.34726  |
| O | -4.95782 | -0.55660 | -0.04707 |
| C | -5.87174 | 0.46019  | 0.26198  |
| H | 1.09579  | -1.46199 | 0.42835  |
| H | -1.33503 | 2.18418  | 0.38094  |
| H | -3.77148 | 1.83452  | 0.47607  |
| H | -3.20483 | -2.25823 | -0.62822 |
| H | -0.76200 | -1.90194 | -0.69788 |
| H | -5.81714 | 1.28664  | -0.45577 |
| H | -6.86392 | 0.01510  | 0.21265  |
| H | -5.71076 | 0.85773  | 1.27056  |
| H | 5.50049  | -1.87868 | 0.60041  |
| C | 3.28984  | 1.08026  | -0.27493 |
| H | 2.59667  | 1.87718  | -0.51378 |
| C | 5.47687  | 0.18737  | 0.01491  |
| C | 4.65642  | 1.25740  | -0.30203 |
| H | 6.55564  | 0.28248  | 0.00512  |
| H | 5.08164  | 2.21844  | -0.56792 |

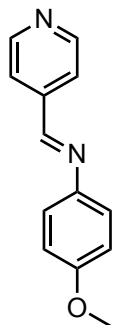

**Imine o**

M06/def2-TZVP Geometry

|   |          |          |          |
|---|----------|----------|----------|
| C | -1.33785 | 0.44440  | 0.12778  |
| N | -0.47669 | -0.44679 | -0.13266 |
| C | 0.88886  | -0.16314 | -0.11755 |
| C | 1.76017  | -1.20031 | 0.18847  |
| C | 3.12849  | -1.00307 | 0.24077  |
| C | 3.65309  | 0.24963  | -0.05375 |
| C | 2.79197  | 1.28886  | -0.40086 |
| C | 1.43246  | 1.08706  | -0.42876 |
| C | -2.77435 | 0.18118  | 0.07507  |
| C | -5.03410 | 0.91360  | 0.33392  |
| O | 4.96854  | 0.54964  | -0.04990 |
| C | 5.88021  | -0.46651 | 0.27082  |
| H | -1.05924 | 1.46691  | 0.42645  |
| H | 1.33777  | -2.17524 | 0.40260  |
| H | 3.77484  | -1.83141 | 0.49904  |
| H | 3.22357  | 2.24889  | -0.65848 |
| H | 0.78040  | 1.89924  | -0.73031 |
| H | 5.82387  | -1.29995 | -0.43840 |
| H | 6.87322  | -0.02403 | 0.21740  |
| H | 5.71730  | -0.85241 | 1.28345  |
| H | -5.75586 | 1.69010  | 0.57655  |
| C | -3.28813 | -1.06089 | -0.28257 |
| H | -2.61358 | -1.86961 | -0.53524 |
| N | -5.52796 | -0.26822 | -0.00493 |
| C | -4.65774 | -1.22902 | -0.30483 |
| H | -5.08162 | -2.19165 | -0.58052 |
| C | -3.67812 | 1.18719  | 0.38911  |
| H | -3.32609 | 2.17326  | 0.67395  |

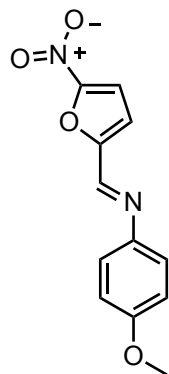

**Imine p**

M06/def2-TZVP Geometry

|   |          |          |          |
|---|----------|----------|----------|
| C | -1.34611 | 0.57888  | 0.18469  |
| N | -0.51629 | -0.34056 | -0.09541 |
| C | 0.85633  | -0.09540 | -0.09221 |
| C | 1.70432  | -1.14978 | 0.22112  |
| C | 3.07818  | -0.98756 | 0.25634  |
| C | 3.63318  | 0.24646  | -0.05917 |
| C | 2.79627  | 1.30225  | -0.41152 |
| C | 1.43098  | 1.13477  | -0.42606 |
| C | -2.76963 | 0.37624  | 0.14300  |
| C | -5.04626 | 0.77337  | 0.30571  |
| O | 4.95836  | 0.51200  | -0.07092 |
| C | 5.84312  | -0.52461 | 0.25487  |
| H | -1.03489 | 1.58885  | 0.49458  |
| H | 1.25931  | -2.11050 | 0.45321  |
| H | 3.70465  | -1.82964 | 0.51968  |
| H | 3.24944  | 2.24793  | -0.68519 |
| H | 0.79729  | 1.95928  | -0.73385 |
| H | 5.75764  | -1.36571 | -0.44271 |
| H | 6.84814  | -0.11162 | 0.18770  |
| H | 5.67872  | -0.89392 | 1.27370  |
| S | -3.45816 | -1.13613 | -0.32036 |
| C | -5.04066 | -0.52706 | -0.10142 |
| C | -3.74399 | 1.29032  | 0.44514  |
| H | -3.51493 | 2.30183  | 0.75776  |
| H | -5.89279 | -1.16429 | -0.28495 |
| H | -5.94936 | 1.33662  | 0.49811  |



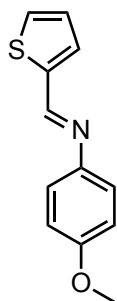

**Imine q**

M06/def2-TZVP Geometry

|   |          |          |          |
|---|----------|----------|----------|
| C | 0.54558  | -0.08507 | -0.00370 |
| N | -0.42318 | 0.72620  | -0.12928 |
| C | -1.74674 | 0.29650  | -0.11254 |
| C | -2.71694 | 1.24308  | 0.19374  |
| C | -4.05828 | 0.91239  | 0.25326  |
| C | -4.45560 | -0.38911 | -0.02945 |
| C | -3.49525 | -1.34147 | -0.37243 |
| C | -2.16462 | -1.00594 | -0.41069 |
| C | 1.90142  | 0.39140  | -0.06423 |
| C | 3.84533  | 1.45940  | -0.20902 |
| O | -5.73127 | -0.81990 | -0.01613 |
| C | -6.74205 | 0.09934  | 0.30559  |
| H | 0.43605  | -1.16372 | 0.16925  |
| H | -2.39079 | 2.25563  | 0.40117  |
| H | -4.78298 | 1.67371  | 0.50936  |
| H | -3.83045 | -2.34243 | -0.61705 |
| H | -1.43968 | -1.75619 | -0.70591 |
| H | -6.77578 | 0.92910  | -0.40894 |
| H | -7.68372 | -0.44432 | 0.26105  |
| H | -6.61261 | 0.50514  | 1.31494  |
| O | 2.87619  | -0.53244 | 0.10078  |
| C | 4.03248  | 0.13088  | 0.00997  |
| C | 2.45030  | 1.63002  | -0.25870 |
| H | 4.62526  | 2.19427  | -0.31731 |
| N | 5.23830  | -0.62018 | 0.14803  |
| O | 5.14617  | -1.81159 | 0.33833  |
| O | 6.26947  | 0.01655  | 0.06048  |
| H | 1.89070  | 2.53727  | -0.41623 |

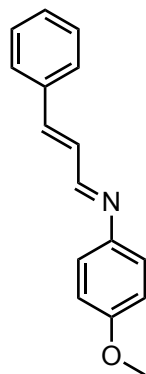

**Imine r**

M06/def2-TZVP Geometry

|   |          |          |          |
|---|----------|----------|----------|
| C | 0.21423  | 0.04719  | 0.00875  |
| N | -0.73186 | -0.77902 | -0.19685 |
| C | -2.06245 | -0.36626 | -0.15740 |
| C | -3.01934 | -1.30018 | 0.22038  |
| C | -4.36184 | -0.97340 | 0.29429  |
| C | -4.77719 | 0.30747  | -0.04853 |
| C | -3.83381 | 1.24328  | -0.46548 |
| C | -2.49954 | 0.91327  | -0.51623 |
| C | 1.59464  | -0.34733 | -0.07529 |
| O | -6.06101 | 0.72946  | -0.02797 |
| C | -7.05025 | -0.18203 | 0.36443  |
| H | 0.02904  | 1.10000  | 0.27701  |
| H | -2.68324 | -2.29953 | 0.47189  |
| H | -5.07405 | -1.72519 | 0.60809  |
| H | -4.18114 | 2.22713  | -0.75880 |
| H | -1.78440 | 1.64625  | -0.87282 |
| H | -6.89414 | -0.53417 | 1.39063  |
| H | -8.00096 | 0.34593  | 0.31375  |
| H | -7.09034 | -1.05030 | -0.30333 |
| C | 2.59891  | 0.51118  | 0.14098  |
| H | 2.33386  | 1.53862  | 0.38969  |
| H | 1.77100  | -1.38904 | -0.32767 |
| C | 6.78675  | -0.18619 | 0.00841  |
| C | 5.90955  | -1.22571 | -0.26661 |
| C | 4.54676  | -1.01703 | -0.22924 |
| C | 4.02419  | 0.23988  | 0.08542  |
| C | 4.92049  | 1.27365  | 0.35789  |
| C | 6.28655  | 1.06565  | 0.32086  |
| H | 7.85672  | -0.35453 | -0.02209 |
| H | 6.29553  | -2.20808 | -0.51286 |
| H | 3.87573  | -1.83982 | -0.44777 |
| H | 4.52842  | 2.25558  | 0.60335  |
| H | 6.96335  | 1.88404  | 0.53678  |

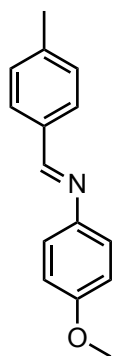

**Imine s**

M06/def2-TZVP Geometry

|   |          |          |          |
|---|----------|----------|----------|
| N | -0.00542 | -0.45084 | -0.14362 |
| C | 0.83941  | 0.45252  | 0.13497  |
| C | -1.37385 | -0.17884 | -0.12736 |
| C | 2.27958  | 0.23792  | 0.08550  |
| C | -2.23981 | -1.20403 | 0.22984  |
| C | -3.60931 | -1.01018 | 0.27967  |
| C | -4.14205 | 0.22524  | -0.06703 |
| C | -3.28789 | 1.25042  | -0.46402 |
| C | -1.92644 | 1.05259  | -0.49118 |
| O | -5.46189 | 0.51930  | -0.06887 |
| C | 2.82719  | -0.98563 | -0.30222 |
| C | 4.19210  | -1.15608 | -0.33489 |
| C | 5.06052  | -0.12059 | 0.01333  |
| C | 4.51188  | 1.09452  | 0.39627  |
| C | 3.14026  | 1.27201  | 0.43241  |
| C | 6.53836  | -0.33179 | -0.02764 |
| C | -6.36331 | -0.48663 | 0.30269  |
| H | 0.52934  | 1.46170  | 0.45160  |
| H | -1.81326 | -2.16717 | 0.48557  |
| H | -4.25002 | -1.82952 | 0.57821  |
| H | -3.72421 | 2.19699  | -0.76105 |
| H | -1.27810 | 1.85223  | -0.83217 |
| H | 2.15420  | -1.79060 | -0.57379 |
| H | 4.60936  | -2.11199 | -0.63784 |
| H | 5.17033  | 1.91264  | 0.66996  |
| H | 2.72417  | 2.22838  | 0.73475  |
| H | 7.08175  | 0.57667  | 0.23430  |
| H | 6.84327  | -1.11791 | 0.66817  |
| H | 6.86493  | -0.64582 | -1.02226 |
| H | -7.36030 | -0.05428 | 0.23700  |
| H | -6.30671 | -1.35134 | -0.36859 |
| H | -6.19157 | -0.82717 | 1.33037  |

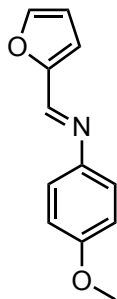

**Imine t**

M06/def2-TZVP Geometry

|   |          |          |          |
|---|----------|----------|----------|
| N | -0.78235 | 0.53225  | -0.17574 |
| C | -1.66131 | -0.33126 | 0.13263  |
| C | 0.57433  | 0.21448  | -0.13699 |
| C | -3.06474 | -0.03821 | 0.04703  |
| C | 1.47371  | 1.24225  | 0.11679  |
| C | 2.83669  | 1.01216  | 0.18316  |
| C | 3.32918  | -0.26757 | -0.04028 |
| C | 2.44164  | -1.30035 | -0.33243 |
| C | 1.08749  | -1.06400 | -0.37817 |
| O | 4.63851  | -0.60141 | -0.01533 |
| C | -3.77326 | 1.05400  | -0.35124 |
| C | -5.13964 | 0.72060  | -0.19654 |
| C | -5.16448 | -0.54791 | 0.28192  |
| O | -3.91745 | -1.02416 | 0.43611  |
| C | 5.57306  | 0.40774  | 0.25242  |
| H | -1.41902 | -1.34087 | 0.49532  |
| H | 1.07714  | 2.23820  | 0.27715  |
| H | 3.50387  | 1.83643  | 0.39842  |
| H | 2.84746  | -2.28470 | -0.53470 |
| H | 0.41535  | -1.87437 | -0.63807 |
| H | -5.96654 | -1.21642 | 0.54909  |
| H | 5.41847  | 0.85231  | 1.24231  |
| H | 6.55577  | -0.05991 | 0.22573  |
| H | 5.53810  | 1.20366  | -0.50035 |
| H | -5.99634 | 1.33800  | -0.41218 |
| H | -3.34247 | 1.97501  | -0.70854 |

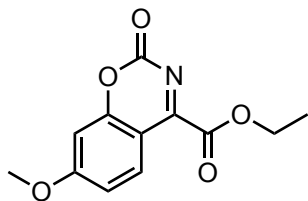

**Imine u**

M06/def2-TZVP Geometry

|   |          |          |          |
|---|----------|----------|----------|
| C | 0.36577  | -0.22397 | -0.15932 |
| C | -0.97119 | 0.27191  | -0.25284 |
| N | -1.28473 | 1.52117  | -0.23333 |
| C | -0.30287 | 2.48469  | -0.13467 |
| O | 1.01775  | 2.05452  | -0.00130 |
| C | 1.34829  | 0.75590  | -0.01220 |
| O | -0.49027 | 3.65654  | -0.14663 |
| C | -2.11873 | -0.69602 | -0.43198 |
| O | -3.17311 | -0.33832 | 0.27530  |
| O | -2.05390 | -1.65613 | -1.14969 |
| C | -4.33994 | -1.16001 | 0.12841  |
| C | -5.41347 | -0.57999 | 0.99892  |
| C | 2.69029  | 0.44056  | 0.12807  |
| C | 3.05775  | -0.89469 | 0.11947  |
| C | 2.08713  | -1.90013 | -0.02704 |
| C | 0.77014  | -1.56977 | -0.16360 |
| O | 4.31685  | -1.32519 | 0.24391  |
| C | 5.34520  | -0.37411 | 0.39183  |
| H | -4.62348 | -1.17463 | -0.92732 |
| H | -4.08508 | -2.18616 | 0.40826  |
| H | -6.32500 | -1.17249 | 0.91102  |
| H | -5.10740 | -0.57502 | 2.04590  |
| H | -5.63947 | 0.44557  | 0.70496  |
| H | 3.40025  | 1.24837  | 0.23760  |
| H | 2.41717  | -2.93115 | -0.03181 |
| H | 0.02513  | -2.34339 | -0.29262 |
| H | 6.27428  | -0.93373 | 0.47314  |
| H | 5.40109  | 0.29105  | -0.47546 |
| H | 5.20677  | 0.22580  | 1.29668  |

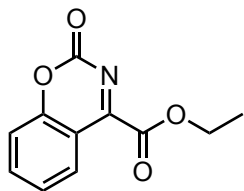

**Imine v**

M06/def2-TZVP Geometry

|   |          |          |          |
|---|----------|----------|----------|
| C | 2.42246  | -2.41307 | -0.20515 |
| C | 1.17515  | -1.87910 | 0.01253  |
| C | 1.00580  | -0.49066 | 0.05624  |
| C | 2.11916  | 0.33014  | -0.12314 |
| C | 3.37944  | -0.20311 | -0.34374 |
| C | 3.52027  | -1.57262 | -0.38228 |
| C | -0.23769 | 0.21070  | 0.23194  |
| N | -0.34516 | 1.48919  | 0.25454  |
| C | 0.77787  | 2.29221  | 0.12794  |
| O | 1.99750  | 1.66791  | -0.08716 |
| C | -1.51389 | -0.56869 | 0.45508  |
| O | -1.57019 | -1.52150 | 1.18242  |
| O | -2.52186 | -0.05728 | -0.22334 |
| C | -3.79736 | -0.68816 | -0.03175 |
| C | -4.79256 | 0.03547  | -0.88739 |
| O | 0.76744  | 3.47700  | 0.18260  |
| H | 2.55370  | -3.48726 | -0.23556 |
| H | 0.31827  | -2.52098 | 0.16784  |
| H | 4.21795  | 0.46831  | -0.47843 |
| H | 4.50140  | -2.00056 | -0.55193 |
| H | -3.70926 | -1.74546 | -0.29697 |
| H | -4.05029 | -0.64140 | 1.03073  |
| H | -5.78105 | -0.40889 | -0.76506 |
| H | -4.85139 | 1.08817  | -0.60885 |
| H | -4.51823 | -0.02402 | -1.94145 |

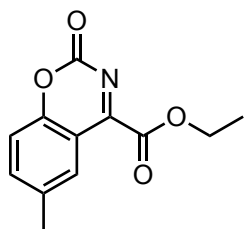

**Imine w**

M06/def2-TZVP Geometry

|   |          |          |          |
|---|----------|----------|----------|
| C | -2.65777 | -1.63752 | -0.13598 |
| C | -1.32503 | -1.35581 | 0.06535  |
| C | -0.86155 | -0.03440 | 0.08144  |

|   |          |          |          |
|---|----------|----------|----------|
| C | -1.77040 | 1.00283  | -0.10994 |
| C | -3.11645 | 0.74102  | -0.31558 |
| C | -3.54081 | -0.56673 | -0.32551 |
| C | 0.50429  | 0.38661  | 0.23856  |
| N | 0.88411  | 1.61278  | 0.23639  |
| C | -0.04052 | 2.63626  | 0.09901  |
| O | -1.36612 | 2.28511  | -0.10129 |
| C | 1.58635  | -0.64315 | 0.47061  |
| O | 1.44728  | -1.57099 | 1.21889  |
| O | 2.67279  | -0.37339 | -0.22645 |
| C | 3.78657  | -1.25692 | -0.02827 |
| C | 4.90660  | -0.77432 | -0.89948 |
| O | 0.22540  | 3.79224  | 0.13253  |
| C | -3.16975 | -3.04138 | -0.15035 |
| H | -0.62047 | -2.16165 | 0.23195  |
| H | -3.79826 | 1.56930  | -0.46170 |
| H | -4.59368 | -0.78029 | -0.48364 |
| H | 4.05118  | -1.24808 | 1.03236  |
| H | 3.47493  | -2.27574 | -0.27524 |
| H | 5.77939  | -1.41614 | -0.77346 |
| H | 4.61830  | -0.79041 | -1.95138 |
| H | 5.18905  | 0.24619  | -0.63867 |
| H | -3.65198 | -3.27722 | -1.10225 |
| H | -2.36545 | -3.76027 | 0.00607  |
| H | -3.91577 | -3.19792 | 0.63270  |

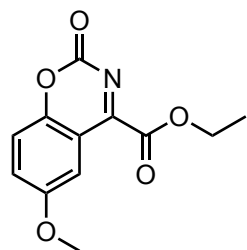

**Imine x**

M06/def2-TZVP Geometry

|   |          |          |          |
|---|----------|----------|----------|
| C | 2.75342  | -0.86187 | -0.14707 |
| C | 1.39169  | -0.87656 | 0.05953  |
| C | 0.68168  | 0.33395  | 0.07671  |
| C | 1.35993  | 1.53195  | -0.11376 |
| C | 2.73257  | 1.54595  | -0.32715 |
| C | 3.41604  | 0.35826  | -0.34223 |
| C | -0.74170 | 0.47450  | 0.23338  |
| N | -1.35600 | 1.60168  | 0.24371  |
| C | -0.65411 | 2.79086  | 0.12039  |
| O | 0.70923  | 2.71001  | -0.09802 |
| C | -1.60230 | -0.75163 | 0.44115  |

|   |          |          |          |
|---|----------|----------|----------|
| O | -1.26937 | -1.66952 | 1.14019  |
| O | -2.74077 | -0.66492 | -0.21782 |
| C | -3.65975 | -1.75260 | -0.03893 |
| C | -4.87434 | -1.45896 | -0.86652 |
| O | -1.14492 | 3.87040  | 0.17778  |
| O | 3.53963  | -1.95641 | -0.17641 |
| C | 2.93353  | -3.20697 | 0.02724  |
| H | 0.85409  | -1.79709 | 0.23394  |
| H | 3.23352  | 2.49436  | -0.47435 |
| H | 4.48759  | 0.33425  | -0.50197 |
| H | -3.16642 | -2.68208 | -0.33713 |
| H | -3.89271 | -1.83795 | 1.02578  |
| H | -4.61697 | -1.37779 | -1.92341 |
| H | -5.60525 | -2.26044 | -0.75235 |
| H | -5.33871 | -0.52249 | -0.55576 |
| H | 2.19172  | -3.42593 | -0.74890 |
| H | 3.72720  | -3.94971 | -0.02126 |
| H | 2.44769  | -3.26463 | 1.00724  |

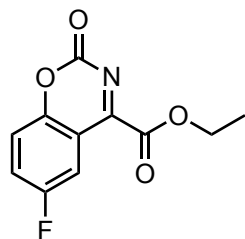

**Imine y**

M06/def2-TZVP Geometry

|   |          |          |          |
|---|----------|----------|----------|
| C | 2.63025  | -1.68060 | -0.13461 |
| C | 1.30026  | -1.42125 | 0.06147  |
| C | 0.87227  | -0.08938 | 0.07787  |
| C | 1.80640  | 0.92915  | -0.10315 |
| C | 3.14978  | 0.64683  | -0.30130 |
| C | 3.56146  | -0.66602 | -0.31609 |
| C | -0.48849 | 0.36157  | 0.22490  |
| N | -0.83606 | 1.59546  | 0.22748  |
| C | 0.11292  | 2.60036  | 0.10583  |
| O | 1.42975  | 2.22027  | -0.09133 |
| C | -1.59498 | -0.64769 | 0.43646  |
| O | -1.46037 | -1.61532 | 1.13376  |
| O | -2.69058 | -0.31321 | -0.21355 |
| C | -3.82375 | -1.17661 | -0.02928 |
| C | -4.95235 | -0.62048 | -0.84336 |
| O | -0.12854 | 3.76060  | 0.14976  |
| F | 3.05490  | -2.93995 | -0.15109 |
| H | 0.60318  | -2.23281 | 0.21961  |



|   |          |          |          |
|---|----------|----------|----------|
| H | 3.84523  | 1.46479  | -0.43871 |
| H | 4.60182  | -0.92763 | -0.46527 |
| H | -3.54606 | -2.18886 | -0.33604 |
| H | -4.05897 | -1.21490 | 1.03755  |
| H | -5.83880 | -1.24474 | -0.72502 |
| H | -5.19949 | 0.39245  | -0.52384 |
| H | -4.69306 | -0.59088 | -1.90243 |

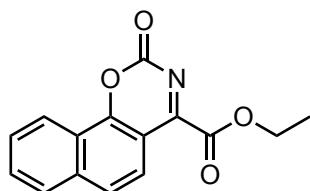

**Imine z**

M06/def2-TZVP Geometry

|   |          |          |          |
|---|----------|----------|----------|
| C | -1.57374 | -2.17981 | -0.05659 |
| C | -0.29883 | -1.74006 | -0.18798 |
| C | -0.02045 | -0.34833 | -0.19334 |
| C | -1.06348 | 0.54927  | -0.06439 |
| C | -2.40612 | 0.12323  | 0.07382  |
| C | -2.65486 | -1.27060 | 0.07631  |
| C | 1.27795  | 0.25099  | -0.28030 |
| N | 1.49747  | 1.51960  | -0.27047 |
| C | 0.44511  | 2.40545  | -0.19362 |
| O | -0.83704 | 1.86623  | -0.06451 |
| C | 2.49772  | -0.62563 | -0.44716 |
| O | 2.52677  | -1.55556 | -1.20492 |
| O | 3.49559  | -0.22315 | 0.31549  |
| C | 4.72501  | -0.95197 | 0.18325  |
| C | 5.71862  | -0.33663 | 1.12160  |
| O | 0.53482  | 3.58802  | -0.21960 |
| C | -3.47445 | 1.02928  | 0.20502  |
| C | -4.75346 | 0.56564  | 0.33492  |
| C | -5.00842 | -0.81411 | 0.33780  |
| C | -3.98335 | -1.71049 | 0.21132  |
| H | -1.79049 | -3.24217 | -0.05532 |
| H | 0.51922  | -2.43754 | -0.30709 |
| H | 4.53497  | -2.00516 | 0.40862  |
| H | 5.04906  | -0.89827 | -0.85942 |
| H | 6.67359  | -0.85824 | 1.04698  |
| H | 5.88065  | 0.71455  | 0.88071  |
| H | 5.37288  | -0.40081 | 2.15418  |
| H | -3.26546 | 2.09149  | 0.20018  |
| H | -5.57511 | 1.26434  | 0.43529  |
| H | -6.02697 | -1.16973 | 0.44077  |

|   |          |          |         |
|---|----------|----------|---------|
| H | -4.17923 | -2.77735 | 0.21274 |
|---|----------|----------|---------|

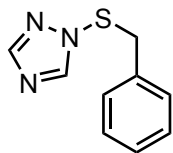

**sulfur**

M06/def2-TZVP Geometry

|   |          |          |          |
|---|----------|----------|----------|
| N | 2.43714  | -0.36285 | 0.68780  |
| N | 1.67552  | 0.17350  | -0.29809 |
| C | 1.28526  | -0.80811 | -1.14537 |
| N | 1.77632  | -1.95685 | -0.77196 |
| C | 2.46570  | -1.62969 | 0.35321  |
| S | 1.24111  | 1.81238  | -0.32836 |
| C | -0.11783 | 1.75656  | 0.89486  |
| C | -1.15140 | 0.74763  | 0.53725  |
| C | -2.07935 | 1.00219  | -0.46708 |
| C | -2.98912 | 0.03318  | -0.84426 |
| C | -2.97765 | -1.20875 | -0.22637 |
| C | -2.05709 | -1.47166 | 0.77202  |
| C | -1.14939 | -0.49679 | 1.15227  |
| H | 0.64941  | -0.60457 | -1.99606 |
| H | 3.00887  | -2.35630 | 0.94056  |
| H | 0.32301  | 1.56396  | 1.87452  |
| H | -0.50737 | 2.77842  | 0.88308  |
| H | -2.07503 | 1.96930  | -0.96144 |
| H | -3.71087 | 0.24444  | -1.62466 |
| H | -3.68742 | -1.97061 | -0.52616 |
| H | -2.03920 | -2.44178 | 1.25418  |
| H | -0.41682 | -0.70485 | 1.92633  |

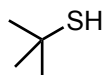

**SHtBu**

M06/def2-TZVP Geometry

|   |          |          |          |
|---|----------|----------|----------|
| H | 1.70841  | -1.23556 | 0.00000  |
| S | 1.49382  | 0.09389  | 0.00000  |
| C | -0.34875 | -0.00932 | 0.00000  |
| C | -0.82793 | 1.43115  | 0.00000  |
| C | -0.82793 | -0.72642 | 1.24707  |
| C | -0.82793 | -0.72642 | -1.24707 |
| H | -0.47712 | 1.96539  | -0.88619 |
| H | -1.92167 | 1.45374  | 0.00000  |
| H | -0.47712 | 1.96539  | 0.88619  |

|   |          |          |          |
|---|----------|----------|----------|
| H | -0.46709 | -1.75778 | 1.27305  |
| H | -0.47893 | -0.22161 | 2.14978  |
| H | -1.92319 | -0.75318 | 1.26626  |
| H | -0.46709 | -1.75778 | -1.27305 |
| H | -1.92319 | -0.75318 | -1.26626 |
| H | -0.47893 | -0.22161 | -2.14978 |

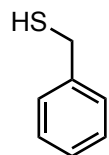

**SHBn**

M06/def2-TZVP Geometry

|   |          |          |          |
|---|----------|----------|----------|
| H | -2.04571 | 0.60052  | -1.43415 |
| S | -2.62105 | -0.16001 | -0.48483 |
| C | -1.44970 | 0.30215  | 0.84245  |
| H | -1.65191 | 1.32542  | 1.16254  |
| H | -1.71103 | -0.36201 | 1.66910  |
| C | 2.63471  | -0.16105 | -0.34232 |
| C | 2.07695  | 1.10085  | -0.24577 |
| C | 0.75597  | 1.24692  | 0.14631  |
| C | -0.02190 | 0.13666  | 0.44430  |
| C | 0.54716  | -1.12777 | 0.33868  |
| C | 1.86503  | -1.27662 | -0.04757 |
| H | 3.66831  | -0.27810 | -0.64604 |
| H | 2.67219  | 1.97770  | -0.47303 |
| H | 0.31998  | 2.23819  | 0.22783  |
| H | -0.06162 | -2.00045 | 0.55519  |
| H | 2.29713  | -2.26796 | -0.12066 |

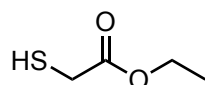

**SHCH<sub>2</sub>COOEt**

M06/def2-TZVP Geometry

|   |          |          |          |
|---|----------|----------|----------|
| H | 2.37089  | -0.19113 | -1.11760 |
| S | 1.86272  | -1.11737 | -0.28326 |
| C | 1.12594  | 0.09351  | 0.86176  |
| H | 0.60352  | -0.49174 | 1.61759  |
| H | 1.90796  | 0.67825  | 1.34186  |
| C | 0.23878  | 1.03949  | 0.09392  |
| O | 0.65888  | 2.07564  | -0.33009 |
| O | -1.02946 | 0.68700  | -0.14757 |
| C | -1.58371 | -0.54019 | 0.31901  |
| H | -0.96449 | -1.37830 | -0.01837 |
| H | -1.60193 | -0.54497 | 1.41510  |

|   |          |          |          |
|---|----------|----------|----------|
| C | -2.97538 | -0.64138 | -0.23445 |
| H | -3.44957 | -1.56383 | 0.10325  |
| H | -3.58370 | 0.20185  | 0.09491  |
| H | -2.95533 | -0.64192 | -1.32478 |

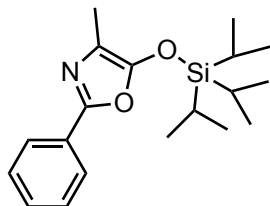

**Silanyloxy oxazole 1**

M06/def2-TZVP Geometry

|    |          |          |          |
|----|----------|----------|----------|
| N  | -1.97611 | 2.11071  | -0.30447 |
| C  | -0.62668 | 2.30429  | -0.53214 |
| C  | -0.05411 | 1.08835  | -0.68900 |
| O  | -1.01651 | 0.13499  | -0.57668 |
| C  | -2.15700 | 0.83398  | -0.33349 |
| C  | -3.38188 | 0.08439  | -0.13626 |
| C  | 0.01335  | 3.63591  | -0.57745 |
| O  | 1.17809  | 0.69635  | -0.93174 |
| Si | 2.07934  | -0.38650 | -0.00188 |
| C  | 1.94782  | 0.11704  | 1.80813  |
| C  | 1.39113  | -2.11380 | -0.28098 |
| C  | -4.57327 | 0.77138  | 0.08815  |
| C  | -5.74916 | 0.07585  | 0.28375  |
| C  | -5.75481 | -1.31077 | 0.25877  |
| C  | -4.57358 | -1.99824 | 0.03632  |
| C  | -3.39182 | -1.30817 | -0.16043 |
| C  | 0.57826  | -0.15500 | 2.42309  |
| C  | 2.34205  | 1.57452  | 2.02398  |
| C  | 2.23177  | -3.17288 | 0.42201  |
| C  | 1.24269  | -2.43755 | -1.76147 |
| C  | 3.82139  | -0.20861 | -0.69615 |
| C  | 4.88854  | -0.60967 | 0.31821  |
| C  | 4.10990  | 1.17985  | -1.25556 |
| H  | -0.42501 | 4.26022  | -1.35934 |
| H  | -0.10967 | 4.16857  | 0.36903  |
| H  | 1.08197  | 3.53616  | -0.77978 |
| H  | 2.68143  | -0.51615 | 2.32878  |
| H  | 0.38876  | -2.11121 | 0.16782  |
| H  | -4.55371 | 1.85462  | 0.10545  |
| H  | -6.67126 | 0.61833  | 0.45710  |
| H  | -6.67970 | -1.85414 | 0.41240  |
| H  | -4.57195 | -3.08184 | 0.01566  |
| H  | -2.46802 | -1.84752 | -0.33667 |

|   |          |          |          |
|---|----------|----------|----------|
| H | 0.58876  | 0.06570  | 3.49498  |
| H | -0.19297 | 0.48014  | 1.97624  |
| H | 0.25919  | -1.19344 | 2.30433  |
| H | 2.27757  | 1.84220  | 3.08335  |
| H | 3.36127  | 1.78819  | 1.69347  |
| H | 1.67091  | 2.24748  | 1.48078  |
| H | 1.78381  | -4.16536 | 0.31237  |
| H | 3.23571  | -3.22857 | -0.01197 |
| H | 2.34447  | -2.98075 | 1.49311  |
| H | 0.80232  | -3.43003 | -1.90087 |
| H | 0.60821  | -1.71565 | -2.27955 |
| H | 2.21420  | -2.44781 | -2.26631 |
| H | 3.86911  | -0.92216 | -1.53130 |
| H | 4.92921  | 0.09916  | 1.15069  |
| H | 4.72101  | -1.60282 | 0.74326  |
| H | 5.87992  | -0.61392 | -0.14492 |
| H | 5.12685  | 1.22858  | -1.65775 |
| H | 3.41733  | 1.45376  | -2.05226 |
| H | 4.03215  | 1.94832  | -0.47997 |

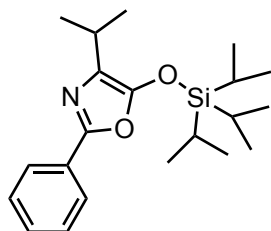

**Silanyloxy oxazole 2**

M06/def2-TZVP Geometry

|    |          |          |          |
|----|----------|----------|----------|
| N  | -2.08607 | 1.63356  | -0.10175 |
| C  | -0.75281 | 1.86839  | -0.38032 |
| C  | -0.18480 | 0.69010  | -0.72447 |
| O  | -1.13750 | -0.28162 | -0.67621 |
| C  | -2.26382 | 0.36878  | -0.28521 |
| C  | -3.47895 | -0.40632 | -0.12531 |
| C  | -0.12924 | 3.21492  | -0.26069 |
| O  | 1.02969  | 0.33402  | -1.08347 |
| Si | 2.14037  | -0.50488 | -0.12100 |
| C  | 3.70397  | -0.27556 | -1.13576 |
| C  | 2.16600  | 0.35018  | 1.55901  |
| C  | -3.49933 | -1.78094 | -0.34767 |
| C  | -4.67211 | -2.49422 | -0.18214 |
| C  | -5.83380 | -1.84811 | 0.20564  |
| C  | -5.81786 | -0.47932 | 0.42788  |
| C  | -4.65090 | 0.23905  | 0.26431  |
| C  | 4.86404  | -1.19034 | -0.76618 |

|   |          |          |          |
|---|----------|----------|----------|
| C | 4.13938  | 1.18531  | -1.14936 |
| C | 3.44557  | 0.09209  | 2.34804  |
| C | 0.94386  | 0.01773  | 2.41047  |
| C | 1.53786  | -2.28362 | -0.02574 |
| C | 2.30998  | -3.16149 | 0.95172  |
| C | 1.48742  | -2.91538 | -1.41165 |
| C | -0.17509 | 3.70240  | 1.18061  |
| H | 0.92052  | 3.10691  | -0.56464 |
| C | -0.80873 | 4.21309  | -1.18598 |
| H | 3.37673  | -0.53522 | -2.15332 |
| H | 2.12745  | 1.42366  | 1.31543  |
| H | -2.59088 | -2.28786 | -0.65180 |
| H | -4.67877 | -3.56368 | -0.35762 |
| H | -6.75152 | -2.40979 | 0.33457  |
| H | -6.72460 | 0.03110  | 0.73111  |
| H | -4.62377 | 1.30875  | 0.43450  |
| H | 4.61388  | -2.24712 | -0.88451 |
| H | 5.73148  | -0.98811 | -1.40261 |
| H | 5.18669  | -1.04360 | 0.26900  |
| H | 4.96491  | 1.33909  | -1.85123 |
| H | 4.49370  | 1.50494  | -0.16441 |
| H | 3.32654  | 1.85368  | -1.44298 |
| H | 3.41187  | 0.60409  | 3.31500  |
| H | 3.58464  | -0.97352 | 2.55617  |
| H | 4.33806  | 0.44147  | 1.82432  |
| H | 0.95375  | 0.59837  | 3.33878  |
| H | -0.00063 | 0.23398  | 1.90370  |
| H | 0.93288  | -1.03848 | 2.69573  |
| H | 0.50440  | -2.19851 | 0.34016  |
| H | 3.36685  | -3.24171 | 0.68089  |
| H | 2.26315  | -2.78524 | 1.97645  |
| H | 1.90476  | -4.17844 | 0.95978  |
| H | 1.02450  | -3.90649 | -1.37253 |
| H | 0.91520  | -2.30851 | -2.11778 |
| H | 2.49210  | -3.04835 | -1.82576 |
| H | 0.28040  | 4.69104  | 1.27446  |
| H | -1.21258 | 3.77185  | 1.51774  |
| H | 0.34917  | 3.01793  | 1.85271  |
| H | -0.75709 | 3.89191  | -2.22805 |
| H | -0.34428 | 5.19867  | -1.10560 |
| H | -1.86363 | 4.31102  | -0.91724 |

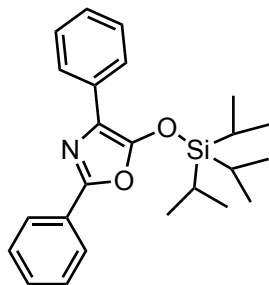

**Silanyloxy oxazole 3**

M06/def2-TZVP Geometry

|    |          |          |          |
|----|----------|----------|----------|
| N  | 1.92887  | 1.58578  | -0.18131 |
| C  | 0.55858  | 1.67973  | -0.36003 |
| C  | 0.08424  | 0.41610  | -0.54608 |
| O  | 1.12671  | -0.44962 | -0.49986 |
| C  | 2.21478  | 0.33434  | -0.26580 |
| C  | 3.50277  | -0.31872 | -0.14230 |
| O  | -1.10962 | -0.08339 | -0.75646 |
| Si | -1.86318 | -1.31476 | 0.13324  |
| C  | -1.79514 | -0.85842 | 1.95728  |
| C  | -3.62281 | -1.20957 | -0.51465 |
| C  | 4.64185  | 0.45389  | 0.07395  |
| C  | 5.87633  | -0.15050 | 0.19815  |
| C  | 5.99232  | -1.52961 | 0.10903  |
| C  | 4.86324  | -2.30182 | -0.10587 |
| C  | 3.62337  | -1.70331 | -0.23156 |
| C  | -2.41272 | 0.51268  | 2.21220  |
| C  | -0.39987 | -0.93369 | 2.56806  |
| C  | -4.64089 | -1.92239 | 0.36679  |
| C  | -3.75684 | -1.65801 | -1.96413 |
| C  | -0.94675 | -2.92694 | -0.18244 |
| C  | -0.61999 | -3.20204 | -1.64423 |
| C  | -1.67888 | -4.10778 | 0.44565  |
| H  | -2.42145 | -1.61409 | 2.45524  |
| H  | -3.83347 | -0.13003 | -0.47669 |
| H  | 4.53642  | 1.53014  | 0.14104  |
| H  | 6.75752  | 0.45779  | 0.36542  |
| H  | 6.96308  | -2.00114 | 0.20652  |
| H  | 4.94845  | -3.37983 | -0.17701 |
| H  | 2.74041  | -2.30859 | -0.40344 |
| H  | -2.43375 | 0.73608  | 3.28319  |
| H  | -1.83066 | 1.30531  | 1.73157  |
| H  | -3.43794 | 0.58988  | 1.84120  |
| H  | -0.43887 | -0.72711 | 3.64197  |
| H  | 0.06571  | -1.91403 | 2.43924  |
| H  | 0.26901  | -0.18716 | 2.12754  |
| H  | -5.65423 | -1.78154 | -0.02210 |

|   |          |          |          |
|---|----------|----------|----------|
| H | -4.45885 | -3.00086 | 0.39694  |
| H | -4.63270 | -1.55925 | 1.39722  |
| H | -3.02084 | -1.18322 | -2.61754 |
| H | -4.75144 | -1.42048 | -2.35414 |
| H | -3.63054 | -2.74149 | -2.05160 |
| H | 0.00651  | -2.79884 | 0.34928  |
| H | 0.02101  | -4.08511 | -1.73429 |
| H | -1.52252 | -3.40223 | -2.22750 |
| H | -0.09946 | -2.36597 | -2.11590 |
| H | -1.08175 | -5.02200 | 0.37319  |
| H | -1.90568 | -3.94755 | 1.50405  |
| H | -2.62495 | -4.30373 | -0.06906 |
| C | -1.48863 | 5.39806  | -0.19456 |
| C | -0.13139 | 5.32599  | 0.07346  |
| C | 0.52979  | 4.11406  | 0.01521  |
| C | -0.15556 | 2.94565  | -0.31372 |
| C | -1.52227 | 3.02835  | -0.58728 |
| C | -2.17847 | 4.24351  | -0.52597 |
| H | -2.00582 | 6.34922  | -0.14839 |
| H | 0.41845  | 6.22409  | 0.33116  |
| H | 1.59102  | 4.05204  | 0.22351  |
| H | -2.06983 | 2.13308  | -0.85966 |
| H | -3.23951 | 4.28954  | -0.74362 |

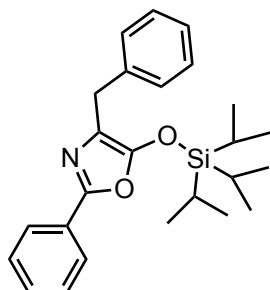

**Silanyloxy oxazole 4**

M06/def2-TZVP Geometry

|    |          |          |          |
|----|----------|----------|----------|
| N  | 1.86133  | -1.67187 | -1.09122 |
| C  | 0.55181  | -1.35625 | -1.39431 |
| C  | 0.36954  | -0.03817 | -1.14509 |
| O  | 1.54499  | 0.48436  | -0.70673 |
| C  | 2.40260  | -0.56954 | -0.69129 |
| C  | 3.75840  | -0.33429 | -0.23688 |
| C  | -0.45616 | -2.35410 | -1.84349 |
| O  | -0.66387 | 0.76542  | -1.24915 |
| Si | -1.42707 | 1.53152  | 0.05755  |
| C  | -0.32896 | 2.95025  | 0.62734  |
| C  | -3.07246 | 2.05868  | -0.67653 |



|   |          |          |          |
|---|----------|----------|----------|
| C | 4.67625  | -1.38266 | -0.25382 |
| C | 5.96974  | -1.17950 | 0.18236  |
| C | 6.36602  | 0.06815  | 0.64025  |
| C | 5.45761  | 1.11315  | 0.65930  |
| C | 4.16011  | 0.91722  | 0.22416  |
| C | -1.09277 | 3.87046  | 1.57409  |
| C | 0.32696  | 3.74133  | -0.49653 |
| C | -3.81814 | 0.84765  | -1.22819 |
| C | -2.93705 | 3.12772  | -1.75363 |
| C | -1.65735 | 0.23641  | 1.40852  |
| C | -2.84201 | 0.52041  | 2.32554  |
| C | -0.40164 | -0.00935 | 2.23710  |
| C | -1.38761 | -2.78265 | -0.73976 |
| C | -2.76264 | -2.65469 | -0.87246 |
| C | -3.61365 | -3.00406 | 0.16527  |
| C | -3.09564 | -3.49352 | 1.35106  |
| C | -1.72279 | -3.63788 | 1.48960  |
| C | -0.87788 | -3.28429 | 0.45390  |
| H | -1.04581 | -1.94183 | -2.66846 |
| H | 0.08416  | -3.21999 | -2.23800 |
| H | 0.47385  | 2.46484  | 1.20020  |
| H | -3.65517 | 2.47647  | 0.15690  |
| H | 4.35328  | -2.35195 | -0.61473 |
| H | 6.67732  | -2.00027 | 0.16502  |
| H | 7.38249  | 0.22479  | 0.98163  |
| H | 5.76176  | 2.09004  | 1.01665  |
| H | 3.44931  | 1.73592  | 0.24002  |
| H | -0.43844 | 4.64968  | 1.97727  |
| H | -1.91399 | 4.37763  | 1.05715  |
| H | -1.52346 | 3.33384  | 2.42448  |
| H | 1.01138  | 4.49195  | -0.08752 |
| H | 0.90001  | 3.10067  | -1.16949 |
| H | -0.41044 | 4.27696  | -1.09976 |
| H | -3.95580 | 0.05758  | -0.48479 |
| H | -3.26995 | 0.40940  | -2.06809 |
| H | -4.80722 | 1.13579  | -1.59769 |
| H | -3.90812 | 3.34040  | -2.21227 |
| H | -2.54815 | 4.06898  | -1.35959 |
| H | -2.26565 | 2.79973  | -2.55351 |
| H | -1.87803 | -0.68793 | 0.85518  |
| H | -2.95445 | -0.28396 | 3.05998  |
| H | -2.70711 | 1.45010  | 2.88828  |
| H | -3.78635 | 0.59825  | 1.78185  |
| H | -0.56126 | -0.83911 | 2.93321  |
| H | -0.14167 | 0.86948  | 2.83646  |
| H | 0.47067  | -0.26150 | 1.62740  |

|   |          |          |          |
|---|----------|----------|----------|
| H | -3.17213 | -2.26279 | -1.79860 |
| H | -4.68518 | -2.88885 | 0.04526  |
| H | -3.75765 | -3.76577 | 2.16475  |
| H | -1.30914 | -4.02609 | 2.41356  |
| H | 0.19784  | -3.38180 | 0.56817  |

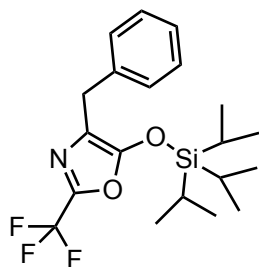

**Silanyloxy oxazole 5**

M06/def2-TZVP Geometry

|    |          |          |          |
|----|----------|----------|----------|
| N  | -1.76237 | -2.36353 | -0.71927 |
| C  | -0.47951 | -1.88503 | -0.91100 |
| C  | -0.48682 | -0.55417 | -0.63310 |
| O  | -1.75037 | -0.19023 | -0.28514 |
| C  | -2.44868 | -1.34720 | -0.35764 |
| C  | 0.65142  | -2.74630 | -1.35142 |
| O  | 0.44216  | 0.35677  | -0.63565 |
| Si | 0.45464  | 1.85628  | 0.16141  |
| C  | -0.03496 | 1.63381  | 1.97592  |
| C  | 2.26022  | 2.34878  | 0.03175  |
| C  | 0.18507  | 0.21174  | 2.48787  |
| C  | -1.44105 | 2.10267  | 2.32925  |
| C  | 2.74701  | 2.44523  | -1.40897 |
| C  | 3.14949  | 1.39116  | 0.81709  |
| C  | -0.71661 | 3.01579  | -0.74418 |
| C  | -0.78512 | 2.79107  | -2.24867 |
| C  | -0.37179 | 4.46639  | -0.42022 |
| C  | 1.93391  | -2.51377 | -0.60017 |
| C  | 1.97815  | -2.66994 | 0.78101  |
| C  | 3.15895  | -2.48689 | 1.47747  |
| C  | 4.31996  | -2.14332 | 0.80171  |
| C  | 4.28648  | -1.97852 | -0.57150 |
| C  | 3.09974  | -2.16057 | -1.26433 |
| H  | 0.32870  | -3.78416 | -1.22217 |
| H  | 0.83511  | -2.61795 | -2.42380 |
| H  | 0.67673  | 2.28946  | 2.50193  |
| H  | 2.32705  | 3.34462  | 0.49430  |
| H  | 0.06861  | 0.17460  | 3.57513  |
| H  | -0.55796 | -0.47544 | 2.06831  |
| H  | 1.17252  | -0.18685 | 2.24254  |

|   |          |          |          |
|---|----------|----------|----------|
| H | -1.61353 | 2.01167  | 3.40614  |
| H | -1.61978 | 3.14540  | 2.05741  |
| H | -2.20097 | 1.49490  | 1.83059  |
| H | 3.81238  | 2.69442  | -1.44084 |
| H | 2.62256  | 1.48813  | -1.92564 |
| H | 2.21547  | 3.20686  | -1.98385 |
| H | 4.19990  | 1.69038  | 0.74266  |
| H | 2.89563  | 1.35021  | 1.87916  |
| H | 3.07526  | 0.37510  | 0.41723  |
| H | -1.71067 | 2.80260  | -0.33033 |
| H | -1.10188 | 1.77677  | -2.49966 |
| H | 0.18194  | 2.95956  | -2.72976 |
| H | -1.49890 | 3.48210  | -2.70816 |
| H | -0.29466 | 4.65166  | 0.65617  |
| H | 0.58407  | 4.75373  | -0.86895 |
| H | -1.13067 | 5.14808  | -0.81554 |
| H | 1.07008  | -2.94096 | 1.31246  |
| H | 3.17561  | -2.61763 | 2.55367  |
| H | 5.24607  | -2.00140 | 1.34624  |
| H | 5.18737  | -1.70462 | -1.10852 |
| H | 3.07690  | -2.02999 | -2.34192 |
| C | -3.88748 | -1.26771 | 0.02544  |
| F | -4.54892 | -0.40760 | -0.74938 |
| F | -4.46443 | -2.44722 | -0.06980 |
| F | -4.01953 | -0.83142 | 1.28127  |

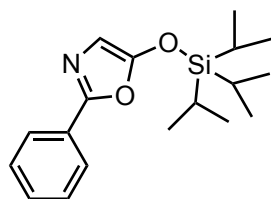

**Silanyloxy oxazole 6**

M06/def2-TZVP Geometry

|   |          |          |          |
|---|----------|----------|----------|
| C | -2.15880 | -1.10570 | -0.36478 |
| N | -2.06728 | -2.38227 | -0.50698 |
| C | -0.72340 | -2.64073 | -0.66964 |
| C | -0.04897 | -1.46837 | -0.61781 |
| O | -0.95046 | -0.47255 | -0.43032 |
| O | 1.21543  | -1.14734 | -0.71576 |
| C | -3.33684 | -0.29130 | -0.14513 |
| C | -3.24323 | 1.08533  | 0.04461  |
| C | -4.38445 | 1.83723  | 0.25462  |
| C | -5.62745 | 1.22781  | 0.27855  |
| C | -5.72469 | -0.14308 | 0.09172  |
| C | -4.59014 | -0.89995 | -0.11879 |

|    |          |          |          |
|----|----------|----------|----------|
| Si | 2.07251  | 0.15473  | -0.05932 |
| C  | 2.02499  | 1.55400  | -1.32314 |
| C  | 3.17667  | 2.54277  | -1.17402 |
| C  | 0.69540  | 2.29676  | -1.35662 |
| C  | 1.28404  | 0.64121  | 1.58036  |
| C  | 2.18140  | 1.61498  | 2.33842  |
| C  | 0.88681  | -0.52762 | 2.47458  |
| C  | 3.81545  | -0.53465 | 0.07289  |
| C  | 4.31377  | -0.98880 | -1.29634 |
| C  | 3.93096  | -1.67676 | 1.07468  |
| H  | -0.32703 | -3.63251 | -0.80876 |
| H  | -2.27041 | 1.56425  | 0.02948  |
| H  | -4.30199 | 2.90787  | 0.40126  |
| H  | -6.52030 | 1.81945  | 0.44294  |
| H  | -6.69537 | -0.62480 | 0.10997  |
| H  | -4.65123 | -1.97164 | -0.26659 |
| H  | 2.14693  | 1.03574  | -2.28543 |
| H  | 3.14195  | 3.29519  | -1.96811 |
| H  | 3.12033  | 3.08387  | -0.22456 |
| H  | 4.15718  | 2.06389  | -1.22009 |
| H  | 0.68744  | 3.03984  | -2.16010 |
| H  | -0.15374 | 1.62843  | -1.51244 |
| H  | 0.52383  | 2.83826  | -0.41991 |
| H  | 0.36434  | 1.17464  | 1.30370  |
| H  | 1.70277  | 1.94131  | 3.26698  |
| H  | 3.13244  | 1.14902  | 2.61571  |
| H  | 2.41228  | 2.51243  | 1.75842  |
| H  | 0.35049  | -0.16563 | 3.35732  |
| H  | 0.23663  | -1.24802 | 1.97168  |
| H  | 1.76188  | -1.07400 | 2.83431  |
| H  | 4.44991  | 0.29458  | 0.41648  |
| H  | 5.34239  | -1.35651 | -1.23085 |
| H  | 3.69934  | -1.80878 | -1.67876 |
| H  | 4.29777  | -0.19032 | -2.04210 |
| H  | 4.93293  | -2.11666 | 1.04590  |
| H  | 3.74645  | -1.35303 | 2.10084  |
| H  | 3.21965  | -2.47676 | 0.84580  |

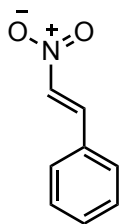

**Nitrostyrene 1**

M06/def2-TZVP Geometry

|   |          |          |          |
|---|----------|----------|----------|
| C | -0.60922 | 0.44132  | 0.00003  |
| C | -1.58865 | -0.45464 | -0.00018 |
| C | 0.81606  | 0.17450  | 0.00005  |
| C | 1.69580  | 1.25638  | -0.00009 |
| C | 3.06380  | 1.05927  | -0.00012 |
| C | 3.57452  | -0.22658 | 0.00002  |
| C | 2.71175  | -1.31385 | 0.00018  |
| C | 1.34741  | -1.11718 | 0.00020  |
| H | -0.91523 | 1.48461  | 0.00020  |
| H | -1.49996 | -1.53103 | -0.00039 |
| H | 1.29077  | 2.26288  | -0.00018 |
| H | 3.73271  | 1.91147  | -0.00023 |
| H | 4.64634  | -0.38579 | 0.00000  |
| H | 3.11041  | -2.32132 | 0.00030  |
| H | 0.68539  | -1.97554 | 0.00035  |
| N | -2.97772 | -0.02973 | -0.00011 |
| O | -3.23508 | 1.15433  | 0.00021  |
| O | -3.79933 | -0.92339 | -0.00019 |

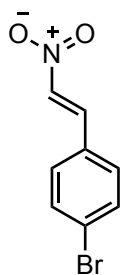

**Nitrostyrene 2**

M06/def2-TZVP Geometry

|   |          |          |          |
|---|----------|----------|----------|
| C | -2.29405 | 0.46416  | 0.00002  |
| C | -3.22232 | -0.48455 | -0.00024 |
| C | -0.85713 | 0.27789  | 0.00006  |
| C | -0.03815 | 1.40613  | -0.00009 |
| C | 1.33825  | 1.29453  | -0.00011 |
| C | 1.90998  | 0.03536  | 0.00006  |
| C | 1.12095  | -1.10590 | 0.00024  |

|    |          |          |          |
|----|----------|----------|----------|
| C  | -0.25065 | -0.98032 | 0.00024  |
| H  | -2.65752 | 1.48875  | 0.00020  |
| H  | -3.07518 | -1.55464 | -0.00048 |
| H  | -0.49505 | 2.39001  | -0.00021 |
| H  | 1.96559  | 2.17693  | -0.00023 |
| Br | 3.78796  | -0.13567 | 0.00006  |
| H  | 1.58558  | -2.08401 | 0.00040  |
| H  | -0.85882 | -1.87756 | 0.00042  |
| N  | -4.63287 | -0.13453 | -0.00019 |
| O  | -4.95186 | 1.03421  | 0.00011  |
| O  | -5.40494 | -1.07083 | -0.00034 |

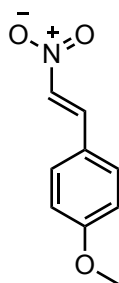

**Nitrostyrene 3**

M06/def2-TZVP Geometry

|   |          |          |          |
|---|----------|----------|----------|
| C | -1.53547 | -0.44177 | -0.00000 |
| C | -2.53141 | 0.43999  | -0.00000 |
| C | -0.11989 | -0.15857 | -0.00000 |
| C | 0.78102  | -1.21928 | 0.00002  |
| C | 2.14883  | -1.01753 | 0.00002  |
| C | 2.64531  | 0.28035  | 0.00001  |
| C | 1.75651  | 1.35920  | -0.00001 |
| C | 0.40431  | 1.14146  | -0.00002 |
| H | -1.82787 | -1.48906 | -0.00000 |
| H | -2.45773 | 1.51743  | -0.00000 |
| H | 0.39569  | -2.23364 | 0.00003  |
| H | 2.81418  | -1.87033 | 0.00004  |
| O | 3.94911  | 0.59798  | 0.00001  |
| H | 2.16773  | 2.36141  | -0.00003 |
| H | -0.26486 | 1.99432  | -0.00003 |
| N | -3.90940 | -0.00525 | -0.00001 |
| O | -4.15074 | -1.19416 | -0.00002 |
| O | -4.74774 | 0.87439  | -0.00002 |
| C | 4.89403  | -0.44289 | 0.00003  |
| H | 5.87480  | 0.02799  | 0.00003  |
| H | 4.79974  | -1.07138 | 0.89179  |
| H | 4.79975  | -1.07140 | -0.89172 |

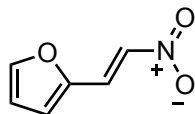

**Nitrostyrene 4**

M06/def2-TZVP Geometry

|   |          |          |          |
|---|----------|----------|----------|
| C | -0.28318 | 0.52469  | 0.00002  |
| C | -1.22591 | -0.41496 | 0.00002  |
| H | -0.60184 | 1.56228  | 0.00002  |
| H | -1.07160 | -1.48352 | 0.00001  |
| N | -2.62480 | -0.04420 | -0.00006 |
| O | -2.92376 | 1.13184  | -0.00005 |
| O | -3.41581 | -0.96537 | -0.00007 |
| C | 1.11793  | 0.28791  | 0.00003  |
| C | 2.17608  | 1.14912  | 0.00011  |
| C | 3.34464  | 0.35327  | -0.00016 |
| C | 2.91520  | -0.93219 | 0.00012  |
| O | 1.57299  | -0.99276 | 0.00006  |
| H | 2.10883  | 2.22552  | 0.00014  |
| H | 4.36931  | 0.68611  | -0.00033 |
| H | 3.43302  | -1.87762 | 0.00016  |

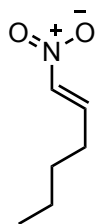

**Nitrostyrene 5**

M06/def2-TZVP Geometry

|   |          |          |          |
|---|----------|----------|----------|
| C | 0.62590  | -0.95483 | -0.00005 |
| C | 1.22778  | 0.22140  | -0.00005 |
| H | 1.26943  | -1.83084 | -0.00007 |
| H | 0.76470  | 1.19731  | -0.00003 |
| N | 2.68434  | 0.31361  | -0.00007 |
| O | 3.34081  | -0.70350 | 0.00007  |
| O | 3.13746  | 1.43849  | 0.00006  |
| C | -0.83879 | -1.17822 | -0.00004 |
| H | -1.08279 | -1.80875 | 0.86594  |
| H | -1.08282 | -1.80871 | -0.86604 |
| C | -1.71532 | 0.05545  | -0.00000 |
| H | -1.48620 | 0.67459  | 0.87631  |
| H | -1.48623 | 0.67462  | -0.87631 |
| C | -3.19241 | -0.28578 | 0.00001  |
| H | -3.41826 | -0.90761 | 0.87443  |

|   |          |          |          |
|---|----------|----------|----------|
| H | -3.41828 | -0.90758 | -0.87442 |
| C | -4.07138 | 0.94586  | 0.00005  |
| H | -5.13171 | 0.68953  | 0.00006  |
| H | -3.87950 | 1.56442  | 0.88078  |
| H | -3.87953 | 1.56445  | -0.88067 |

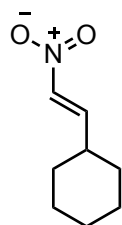

### Nitrostyrene 6

#### M06/def2-TZVP Geometry

|   |          |          |          |
|---|----------|----------|----------|
| C | -0.77589 | 0.00002  | 0.21643  |
| C | -1.84483 | 0.00002  | -0.55874 |
| H | -0.93005 | 0.00003  | 1.29472  |
| H | -1.85622 | 0.00000  | -1.64008 |
| N | -3.19025 | 0.00002  | 0.00536  |
| O | -3.32384 | 0.00000  | 1.20842  |
| O | -4.09708 | -0.00003 | -0.79992 |
| C | 2.80721  | -1.25120 | -0.23858 |
| C | 1.35578  | -1.25347 | 0.20587  |
| C | 0.62343  | 0.00001  | -0.27473 |
| C | 1.35580  | 1.25347  | 0.20586  |
| C | 2.80723  | 1.25118  | -0.23859 |
| C | 3.52602  | -0.00001 | 0.23421  |
| H | 2.84780  | -1.29914 | -1.33452 |
| H | 3.31200  | -2.14844 | 0.12894  |
| H | 1.30682  | -1.28515 | 1.30319  |
| H | 0.83760  | -2.14658 | -0.15509 |
| H | 0.62124  | 0.00000  | -1.37421 |
| H | 0.83762  | 2.14659  | -0.15510 |
| H | 1.30683  | 1.28517  | 1.30318  |
| H | 2.84782  | 1.29912  | -1.33453 |
| H | 3.31203  | 2.14842  | 0.12892  |
| H | 3.56452  | -0.00001 | 1.33142  |
| H | 4.56261  | -0.00002 | -0.11278 |



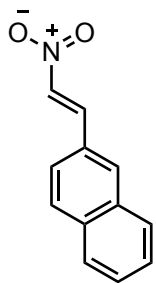

**Nitrostyrene 7**

M06/def2-TZVP Geometry

|   |          |          |          |
|---|----------|----------|----------|
| C | 1.86983  | -0.37285 | 0.00001  |
| C | 2.93971  | 0.41502  | 0.00001  |
| H | 2.06210  | -1.44278 | 0.00001  |
| H | 2.96516  | 1.49459  | 0.00001  |
| N | 4.27431  | -0.15551 | 0.00000  |
| O | 4.40361  | -1.36077 | -0.00001 |
| O | 5.18786  | 0.64442  | -0.00001 |
| C | -1.21558 | 1.75788  | 0.00001  |
| C | 0.09749  | 1.40908  | 0.00001  |
| C | 0.48493  | 0.04457  | 0.00001  |
| C | -0.49453 | -0.92109 | 0.00001  |
| H | -1.50440 | 2.80376  | 0.00001  |
| H | 0.85688  | 2.18205  | 0.00001  |
| H | -0.21083 | -1.96969 | 0.00001  |
| C | -2.23437 | 0.77742  | 0.00000  |
| C | -1.86163 | -0.59141 | 0.00000  |
| C | -2.87084 | -1.57630 | -0.00000 |
| C | -4.18902 | -1.22191 | -0.00001 |
| C | -4.55729 | 0.13454  | -0.00001 |
| C | -3.60133 | 1.11099  | -0.00000 |
| H | -2.57839 | -2.62117 | -0.00000 |
| H | -4.95750 | -1.98564 | -0.00001 |
| H | -5.60699 | 0.40359  | -0.00001 |
| H | -3.88207 | 2.15907  | -0.00000 |

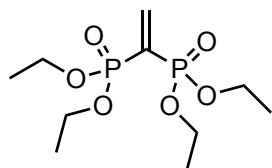

**Phosphonate**

M06/def2-TZVP Geometry

|   |         |          |          |
|---|---------|----------|----------|
| C | 0.37109 | -1.57212 | -2.19391 |
| C | 0.06299 | -0.85792 | -1.11785 |
| P | 1.29685 | -0.22503 | 0.01596  |

|   |          |          |          |
|---|----------|----------|----------|
| P | -1.67423 | -0.64504 | -0.71527 |
| O | 1.36943  | -0.94998 | 1.28659  |
| O | 2.60063  | -0.24432 | -0.87551 |
| O | 1.00781  | 1.32259  | 0.16899  |
| C | 0.41891  | 1.86731  | 1.35543  |
| C | 3.84272  | 0.13468  | -0.27236 |
| C | 4.93829  | -0.07792 | -1.27443 |
| C | 1.48873  | 2.30551  | 2.31522  |
| O | -2.57213 | -1.52444 | -1.45855 |
| O | -1.75780 | -0.75992 | 0.86427  |
| O | -1.86365 | 0.90989  | -0.90845 |
| C | -1.68506 | -2.05488 | 1.47986  |
| C | -1.45571 | -1.85735 | 2.94790  |
| C | -3.11770 | 1.51965  | -0.58601 |
| C | -3.13754 | 2.89464  | -1.18547 |
| H | -0.41363 | -2.00427 | -2.80751 |
| H | 1.39952  | -1.74588 | -2.49060 |
| H | -0.19204 | 2.70869  | 1.01930  |
| H | -0.24839 | 1.12904  | 1.81021  |
| H | 3.77804  | 1.18613  | 0.03123  |
| H | 3.99701  | -0.46635 | 0.62958  |
| H | 5.89997  | 0.20981  | -0.84709 |
| H | 4.99414  | -1.12705 | -1.56855 |
| H | 4.76603  | 0.52134  | -2.16964 |
| H | 2.16127  | 3.02391  | 1.84165  |
| H | 2.07258  | 1.44546  | 2.64952  |
| H | 1.04381  | 2.78028  | 3.19180  |
| H | -0.85713 | -2.61831 | 1.03473  |
| H | -2.61533 | -2.58943 | 1.26724  |
| H | -1.43129 | -2.82145 | 3.45819  |
| H | -0.49947 | -1.35682 | 3.10854  |
| H | -2.25471 | -1.25685 | 3.38707  |
| H | -3.93086 | 0.89887  | -0.97669 |
| H | -3.21435 | 1.55581  | 0.50485  |
| H | -4.07261 | 3.40055  | -0.94030 |
| H | -3.04642 | 2.84356  | -2.27115 |
| H | -2.30996 | 3.49402  | -0.80170 |

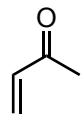

**MVK**

M06/def2-TZVP Geometry

|   |         |          |          |
|---|---------|----------|----------|
| C | 0.83573 | 1.28797  | 0.00016  |
| C | 0.54534 | -0.18685 | -0.00104 |

|   |          |          |          |
|---|----------|----------|----------|
| C | -0.86567 | -0.63592 | -0.00011 |
| O | 1.43312  | -1.00547 | 0.00038  |
| C | -1.92260 | 0.16296  | 0.00014  |
| H | 0.40216  | 1.76952  | 0.87960  |
| H | 1.91306  | 1.43820  | 0.00090  |
| H | 0.40320  | 1.77059  | -0.87919 |
| H | -0.97848 | -1.71624 | 0.00029  |
| H | -2.93179 | -0.23085 | 0.00066  |
| H | -1.82981 | 1.24354  | -0.00025 |

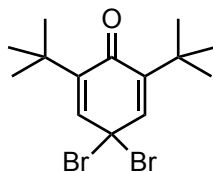

**Bromide**

M06/def2-TZVP Geometry

|    |          |          |          |
|----|----------|----------|----------|
| C  | -1.14725 | -0.00000 | 0.00001  |
| C  | -0.37605 | 1.24894  | -0.00004 |
| C  | 0.95830  | 1.28700  | -0.00007 |
| C  | 1.71797  | 0.00000  | -0.00001 |
| C  | 0.95831  | -1.28700 | 0.00006  |
| C  | -0.37605 | -1.24894 | 0.00005  |
| O  | 2.93118  | 0.00000  | -0.00002 |
| C  | 1.72855  | -2.59972 | 0.00010  |
| C  | 1.72855  | 2.59972  | -0.00012 |
| C  | 2.59814  | 2.69768  | 1.25575  |
| C  | 0.78763  | 3.79847  | 0.00031  |
| C  | 2.59740  | 2.69803  | -1.25647 |
| C  | 2.59815  | -2.69766 | -1.25576 |
| C  | 0.78763  | -3.79847 | -0.00036 |
| C  | 2.59739  | -2.69805 | 1.25646  |
| Br | -2.30819 | 0.00006  | 1.59416  |
| Br | -2.30821 | -0.00006 | -1.59414 |
| H  | -0.97562 | 2.15098  | -0.00008 |
| H  | -0.97562 | -2.15098 | 0.00009  |
| H  | 3.35023  | 1.91231  | 1.29283  |
| H  | 3.10983  | 3.66387  | 1.26754  |
| H  | 1.98151  | 2.63579  | 2.15697  |
| H  | 0.14977  | 3.82155  | -0.88750 |
| H  | 0.15036  | 3.82138  | 0.88856  |
| H  | 1.38149  | 4.71492  | 0.00021  |
| H  | 1.98026  | 2.63634  | -2.15735 |
| H  | 3.10903  | 3.66426  | -1.26833 |
| H  | 3.34951  | 1.91271  | -1.29419 |
| H  | 3.35024  | -1.91229 | -1.29283 |

|   |         |          |          |
|---|---------|----------|----------|
| H | 3.10984 | -3.66385 | -1.26756 |
| H | 1.98154 | -2.63576 | -2.15699 |
| H | 0.14976 | -3.82156 | 0.88745  |
| H | 0.15038 | -3.82136 | -0.88862 |
| H | 1.38150 | -4.71492 | -0.00026 |
| H | 1.98024 | -2.63637 | 2.15733  |
| H | 3.10901 | -3.66428 | 1.26831  |
| H | 3.34951 | -1.91274 | 1.29420  |

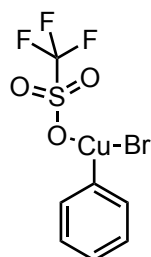

### Copper 1

#### M06/def2-TZVP Geometry

|    |          |          |          |
|----|----------|----------|----------|
| Br | -1.48892 | -2.28641 | -0.42261 |
| C  | -1.87279 | 0.58656  | 0.03717  |
| O  | 0.81646  | 0.95924  | 0.88885  |
| S  | 2.05700  | 0.13587  | 0.87529  |
| O  | 2.99229  | 0.36832  | 1.90993  |
| O  | 1.60898  | -1.23486 | 0.60987  |
| C  | 2.87242  | 0.66000  | -0.69066 |
| F  | 3.22755  | 1.92447  | -0.60823 |
| F  | 3.93398  | -0.08301 | -0.91180 |
| F  | 2.02392  | 0.51612  | -1.69986 |
| C  | -1.78459 | 1.42004  | -1.04909 |
| C  | -2.67360 | 2.48752  | -1.08248 |
| C  | -3.61255 | 2.64846  | -0.07770 |
| C  | -3.68279 | 1.75029  | 0.97253  |
| C  | -2.81009 | 0.66931  | 1.03338  |
| H  | -1.04671 | 1.28036  | -1.83018 |
| H  | -2.62350 | 3.18875  | -1.90722 |
| H  | -4.30661 | 3.47907  | -0.12077 |
| H  | -4.42780 | 1.87014  | 1.75037  |
| H  | -2.86956 | -0.05790 | 1.83284  |
| Cu | -0.35009 | -0.52424 | 0.27284  |

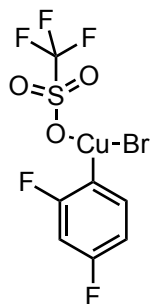

**Copper 2**

M06/def2-TZVP Geometry

|    |          |          |          |
|----|----------|----------|----------|
| Br | -0.69110 | 2.63443  | -0.44575 |
| C  | -1.62621 | -0.09694 | -0.11714 |
| O  | 0.91600  | -1.02652 | 0.79558  |
| S  | 2.28828  | -0.44783 | 0.81276  |
| O  | 3.13628  | -0.82686 | 1.87716  |
| O  | 2.09526  | 0.98150  | 0.52580  |
| C  | 3.04399  | -1.12260 | -0.72615 |
| F  | 2.27252  | -0.82951 | -1.76185 |
| F  | 4.23088  | -0.58747 | -0.90553 |
| F  | 3.15655  | -2.42918 | -0.62870 |
| C  | -2.03161 | -0.52830 | -1.35720 |
| C  | -3.14129 | -1.35520 | -1.44425 |
| C  | -3.82708 | -1.66713 | -0.28674 |
| C  | -3.45307 | -1.19109 | 0.95558  |
| C  | -2.34432 | -0.37370 | 1.02771  |
| H  | -1.49240 | -0.24007 | -2.25137 |
| H  | -3.48360 | -1.74209 | -2.39510 |
| F  | -1.95680 | 0.10963  | 2.19351  |
| H  | -4.00804 | -1.44927 | 1.84857  |
| F  | -4.89367 | -2.44713 | -0.36489 |
| Cu | 0.08179  | 0.65619  | 0.16217  |

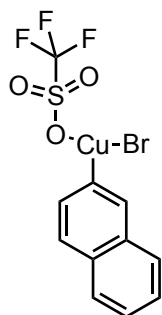

**Copper 3**

M06/def2-TZVP Geometry

|    |          |         |         |
|----|----------|---------|---------|
| Br | -0.31243 | 2.88186 | 0.62575 |
|----|----------|---------|---------|

|    |          |          |          |
|----|----------|----------|----------|
| C  | 1.16804  | 0.57492  | -0.36103 |
| O  | -1.20256 | -0.83550 | -1.10641 |
| S  | -2.64554 | -0.71023 | -0.76563 |
| O  | -3.57456 | -1.14078 | -1.74129 |
| O  | -2.79237 | 0.62709  | -0.18108 |
| C  | -2.82878 | -1.85460 | 0.66584  |
| F  | -1.95269 | -1.53222 | 1.60650  |
| F  | -4.04436 | -1.75872 | 1.15891  |
| F  | -2.60628 | -3.09280 | 0.27940  |
| C  | 1.68425  | 0.66228  | -1.65270 |
| C  | 2.91508  | 0.10197  | -1.85738 |
| C  | 1.81153  | 0.07635  | 0.71774  |
| H  | 1.12632  | 1.11308  | -2.46349 |
| H  | 3.35004  | 0.11280  | -2.85152 |
| H  | 1.39453  | 0.11077  | 1.71781  |
| C  | 3.63513  | -0.50054 | -0.80378 |
| C  | 3.07876  | -0.52017 | 0.50181  |
| C  | 3.80764  | -1.10783 | 1.55457  |
| C  | 5.03563  | -1.65649 | 1.32260  |
| C  | 5.58932  | -1.64153 | 0.03069  |
| C  | 4.90557  | -1.07629 | -1.00660 |
| H  | 3.37432  | -1.11722 | 2.54873  |
| H  | 5.58859  | -2.10903 | 2.13711  |
| H  | 6.56432  | -2.08250 | -0.13866 |
| H  | 5.32942  | -1.06143 | -2.00503 |
| Cu | -0.69969 | 0.87692  | -0.22206 |

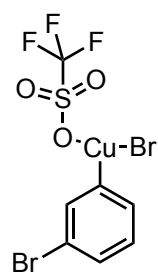

#### Copper 4

M06/def2-TZVP Geometry

|    |          |          |          |
|----|----------|----------|----------|
| Br | -0.51886 | -2.78854 | 1.05034  |
| C  | 1.04641  | -0.92028 | -0.54497 |
| O  | -1.22582 | 0.65688  | -1.22639 |
| S  | -2.65238 | 0.69689  | -0.79907 |
| O  | -3.60272 | 1.08547  | -1.77066 |
| O  | -2.86211 | -0.54913 | -0.05169 |
| C  | -2.65743 | 2.01030  | 0.49249  |

|    |          |          |          |
|----|----------|----------|----------|
| F  | -3.84115 | 2.06788  | 1.06086  |
| F  | -1.74617 | 1.72808  | 1.41230  |
| F  | -2.37123 | 3.17227  | -0.05330 |
| C  | 1.51263  | -1.59865 | -1.64167 |
| C  | 2.77845  | -1.24539 | -2.09345 |
| C  | 3.52717  | -0.29165 | -1.42864 |
| C  | 3.01440  | 0.32376  | -0.29909 |
| C  | 1.75164  | 0.00385  | 0.18451  |
| H  | 0.93005  | -2.36266 | -2.13971 |
| H  | 3.18451  | -1.73630 | -2.97010 |
| Br | 4.04356  | 1.61124  | 0.61659  |
| H  | 1.35624  | 0.48023  | 1.07326  |
| H  | 4.51802  | -0.02979 | -1.77732 |
| Cu | -0.81389 | -0.97406 | -0.17749 |

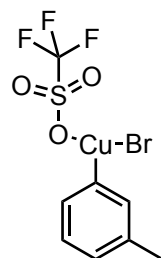

### Copper 5

#### M06/def2-TZVP Geometry

|    |          |          |          |
|----|----------|----------|----------|
| Br | -0.97413 | -2.56920 | 0.27343  |
| C  | -1.71200 | 0.25026  | 0.27547  |
| O  | 0.83081  | 1.08898  | -0.71529 |
| S  | 2.15125  | 0.43591  | -0.92575 |
| O  | 1.89525  | -1.00396 | -0.81753 |
| O  | 2.94102  | 0.91661  | -1.99612 |
| C  | 3.06381  | 0.85294  | 0.61868  |
| F  | 4.22241  | 0.23115  | 0.63290  |
| F  | 3.25999  | 2.15279  | 0.68493  |
| F  | 2.35346  | 0.47056  | 1.67065  |
| C  | -1.69936 | 0.82591  | 1.51992  |
| C  | -2.69525 | 1.76505  | 1.75748  |
| C  | -3.64748 | 2.04256  | 0.79302  |
| C  | -3.64760 | 1.40169  | -0.43949 |
| C  | -2.65651 | 0.45106  | -0.69397 |
| H  | -0.95559 | 0.58530  | 2.26922  |
| H  | -2.72345 | 2.27163  | 2.71528  |
| H  | -2.64268 | -0.09038 | -1.63315 |
| H  | -4.42573 | 2.76770  | 1.00612  |
| C  | -4.66734 | 1.71625  | -1.48430 |
| H  | -4.93874 | 0.82852  | -2.05741 |

|    |          |          |          |
|----|----------|----------|----------|
| H  | -5.57367 | 2.12968  | -1.04050 |
| H  | -4.28134 | 2.45437  | -2.19234 |
| Cu | -0.09219 | -0.60473 | -0.22659 |

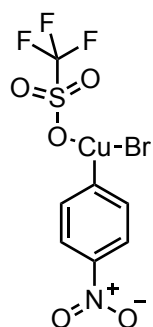

### Copper 6

#### M06/def2-TZVP Geometry

|    |          |          |          |
|----|----------|----------|----------|
| Br | 0.24213  | 2.84525  | 0.50370  |
| C  | -1.26603 | 0.42120  | -0.06306 |
| O  | 1.02669  | -1.00425 | -0.92552 |
| S  | 2.49826  | -0.76132 | -0.88999 |
| O  | 3.26621  | -1.31747 | -1.93684 |
| O  | 2.63475  | 0.66800  | -0.57987 |
| C  | 3.01488  | -1.61634 | 0.65825  |
| F  | 2.82964  | -2.91167 | 0.53319  |
| F  | 4.28182  | -1.36903 | 0.89897  |
| F  | 2.28297  | -1.16966 | 1.66974  |
| C  | -1.55936 | -0.40176 | 0.99932  |
| C  | -2.81576 | -0.98552 | 1.01656  |
| C  | -3.70299 | -0.69041 | -0.00063 |
| C  | -3.39432 | 0.16910  | -1.03642 |
| C  | -2.14218 | 0.76383  | -1.06417 |
| H  | -0.84076 | -0.61118 | 1.78262  |
| H  | -3.11094 | -1.66070 | 1.80883  |
| H  | -1.87594 | 1.46157  | -1.84752 |
| H  | -4.13205 | 0.37693  | -1.80012 |
| N  | -5.04463 | -1.31015 | 0.02871  |
| O  | -5.29067 | -2.05240 | 0.94968  |
| O  | -5.80221 | -1.03112 | -0.87006 |
| Cu | 0.57903  | 0.79974  | -0.26239 |



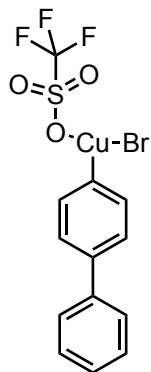

### Copper 7

#### M06/def2-TZVP Geometry

|    |          |          |          |
|----|----------|----------|----------|
| Br | 1.36616  | 2.88099  | -0.54866 |
| C  | -0.52890 | 0.75087  | 0.05038  |
| O  | 1.52080  | -1.03927 | 0.94721  |
| S  | 3.00801  | -1.03389 | 0.90760  |
| O  | 3.68235  | -1.69945 | 1.95739  |
| O  | 3.38270  | 0.34585  | 0.57952  |
| C  | 3.37602  | -1.98092 | -0.62848 |
| F  | 2.72461  | -1.43873 | -1.64885 |
| F  | 4.66677  | -1.94737 | -0.87570 |
| F  | 2.98571  | -3.23010 | -0.48851 |
| C  | -0.94544 | -0.05329 | -0.98098 |
| C  | -2.27661 | -0.44062 | -0.96996 |
| C  | -1.34713 | 1.27513  | 1.01731  |
| H  | -0.27243 | -0.39476 | -1.75865 |
| H  | -2.64041 | -1.08309 | -1.76426 |
| H  | -0.98183 | 1.95614  | 1.77510  |
| C  | -3.15511 | 0.00739  | 0.01520  |
| C  | -2.67231 | 0.86524  | 1.00082  |
| H  | -3.33747 | 1.21542  | 1.78229  |
| C  | -7.24701 | -1.19666 | -0.02481 |
| C  | -6.90585 | 0.09788  | 0.32897  |
| C  | -5.57972 | 0.48794  | 0.34386  |
| C  | -4.56897 | -0.40743 | 0.00199  |
| C  | -4.92623 | -1.70594 | -0.35335 |
| C  | -6.25221 | -2.09743 | -0.36495 |
| H  | -8.28624 | -1.50294 | -0.03492 |
| H  | -7.67869 | 0.81190  | 0.58829  |
| H  | -5.32426 | 1.51107  | 0.59765  |
| H  | -4.15198 | -2.42594 | -0.59528 |
| H  | -6.50929 | -3.11519 | -0.63392 |
| Cu | 1.35639  | 0.82106  | 0.25357  |

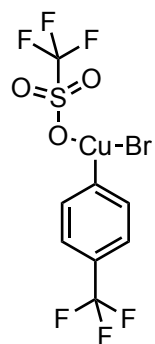

### Copper 8

#### M06/def2-TZVP Geometry

|    |          |          |          |
|----|----------|----------|----------|
| Br | -0.68755 | 2.89655  | 0.45906  |
| C  | 0.97391  | 0.56683  | -0.08348 |
| O  | -1.23677 | -1.02171 | -0.90650 |
| S  | -2.71916 | -0.86999 | -0.86883 |
| O  | -3.45511 | -1.49315 | -1.90161 |
| O  | -2.94787 | 0.55165  | -0.58249 |
| C  | -3.17594 | -1.72993 | 0.69507  |
| F  | -4.45640 | -1.56293 | 0.93617  |
| F  | -2.90689 | -3.01308 | 0.59237  |
| F  | -2.47362 | -1.22011 | 1.69783  |
| C  | 1.31884  | -0.24355 | 0.97268  |
| C  | 2.60885  | -0.74636 | 0.97628  |
| C  | 3.49608  | -0.40209 | -0.03400 |
| C  | 3.11275  | 0.44739  | -1.05496 |
| C  | 1.82477  | 0.96969  | -1.07877 |
| H  | 0.61714  | -0.50439 | 1.75588  |
| H  | 2.92507  | -1.40921 | 1.77427  |
| H  | 3.81536  | 0.72201  | -1.83149 |
| H  | 1.51829  | 1.65770  | -1.85596 |
| C  | 4.88658  | -0.96843 | 0.02726  |
| F  | 5.64023  | -0.56848 | -0.98968 |
| F  | 5.50202  | -0.60493 | 1.15277  |
| F  | 4.86167  | -2.30089 | 0.01178  |
| Cu | -0.89535 | 0.82251  | -0.27639 |

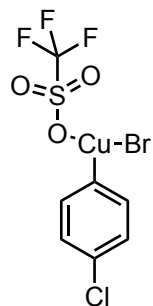

### Copper 9

#### M06/def2-TZVP Geometry

|    |          |          |          |
|----|----------|----------|----------|
| Br | 0.11200  | 2.80456  | 0.44713  |
| C  | 1.47299  | 0.28160  | -0.06416 |
| O  | -0.92584 | -1.02917 | -0.89645 |
| S  | -2.37371 | -0.68217 | -0.87373 |
| O  | -3.17955 | -1.21489 | -1.90557 |
| O  | -2.41727 | 0.76013  | -0.60418 |
| C  | -2.95284 | -1.45518 | 0.69465  |
| F  | -4.20176 | -1.11689 | 0.92354  |
| F  | -2.85706 | -2.76438 | 0.60852  |
| F  | -2.19677 | -1.03265 | 1.69907  |
| C  | 1.70384  | -0.56329 | 0.99431  |
| C  | 2.91780  | -1.23363 | 1.01586  |
| C  | 3.84614  | -0.99900 | 0.01496  |
| C  | 3.59562  | -0.10264 | -1.00954 |
| C  | 2.38754  | 0.57968  | -1.04280 |
| H  | 0.96715  | -0.73365 | 1.77064  |
| H  | 3.14098  | -1.93484 | 1.81033  |
| H  | 4.34494  | 0.07457  | -1.77096 |
| H  | 2.18425  | 1.30564  | -1.81950 |
| Cl | 5.36053  | -1.83350 | 0.05706  |
| Cu | -0.34662 | 0.76773  | -0.27865 |

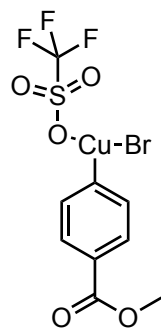

### Copper 10

#### M06/def2-TZVP Geometry

|    |          |          |          |
|----|----------|----------|----------|
| Br | 0.85968  | 2.87015  | 0.60947  |
| C  | -0.92261 | 0.67932  | -0.10476 |
| O  | 1.21113  | -0.99139 | -0.97488 |
| S  | 2.69726  | -0.94076 | -0.88337 |
| O  | 3.42616  | -1.55064 | -1.92955 |
| O  | 3.01081  | 0.44113  | -0.50248 |
| C  | 3.04342  | -1.92210 | 0.63658  |
| F  | 4.32290  | -1.85435 | 0.92839  |
| F  | 2.34013  | -1.43059 | 1.64792  |
| F  | 2.69848  | -3.17714 | 0.44568  |
| C  | -1.34269 | -0.14705 | 0.90818  |
| C  | -2.65749 | -0.58458 | 0.84915  |
| C  | -3.49373 | -0.15928 | -0.17585 |
| C  | -3.02223 | 0.71136  | -1.14929 |
| C  | -1.71358 | 1.16769  | -1.11389 |
| H  | -0.68184 | -0.47029 | 1.70360  |
| H  | -3.03197 | -1.25843 | 1.60907  |
| H  | -3.69833 | 1.03953  | -1.93011 |
| H  | -1.34199 | 1.86620  | -1.85230 |
| C  | -4.91252 | -0.59332 | -0.27345 |
| O  | -5.25476 | -1.42467 | 0.71447  |
| O  | -5.66419 | -0.23936 | -1.13847 |
| C  | -6.59959 | -1.88408 | 0.68412  |
| H  | -6.71622 | -2.54195 | 1.54162  |
| H  | -7.29501 | -1.04655 | 0.75271  |
| H  | -6.80026 | -2.42813 | -0.23973 |
| Cu | 0.96414  | 0.83128  | -0.23786 |

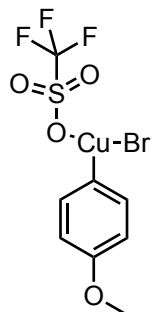

### Copper 11

M06/def2-TZVP Geometry

|    |          |          |          |
|----|----------|----------|----------|
| Br | -0.13578 | 2.84586  | -0.39504 |
| C  | -1.46717 | 0.32082  | 0.17898  |
| O  | 0.99065  | -0.98299 | 0.92710  |
| S  | 2.43236  | -0.65144 | 0.77967  |
| O  | 3.30236  | -1.09747 | 1.80216  |
| O  | 2.46806  | 0.75996  | 0.38011  |
| C  | 2.91546  | -1.56607 | -0.74381 |
| F  | 2.80445  | -2.86209 | -0.54080 |
| F  | 2.12033  | -1.21642 | -1.74382 |
| F  | 4.15877  | -1.27545 | -1.06050 |
| C  | -2.04990 | -0.01787 | -1.01288 |
| C  | -3.25383 | -0.71201 | -0.96705 |
| C  | -2.05632 | 0.14160  | 1.41180  |
| H  | -1.59135 | 0.22264  | -1.96362 |
| H  | -3.71190 | -1.02481 | -1.89582 |
| H  | -1.59024 | 0.47936  | 2.32924  |
| C  | -3.85514 | -0.97408 | 0.25901  |
| C  | -3.25497 | -0.53998 | 1.44221  |
| H  | -3.74930 | -0.75106 | 2.38292  |
| O  | -5.02010 | -1.62552 | 0.40651  |
| C  | -5.68864 | -2.07592 | -0.74523 |
| H  | -5.07918 | -2.78922 | -1.31022 |
| H  | -6.59279 | -2.57520 | -0.40369 |
| H  | -5.96664 | -1.24376 | -1.40057 |
| Cu | 0.36894  | 0.78603  | 0.22945  |

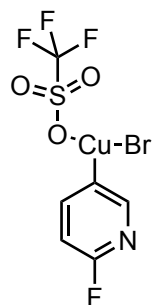

**Copper 12**

M06/def2-TZVP Geometry

|    |          |          |          |
|----|----------|----------|----------|
| Br | -0.87770 | 2.64348  | 0.21232  |
| C  | -1.73471 | -0.12419 | -0.09794 |
| O  | 0.88877  | -1.00538 | -0.81569 |
| S  | 2.25402  | -0.40545 | -0.77342 |
| O  | 2.02891  | 1.01610  | -0.48083 |
| O  | 3.14045  | -0.76345 | -1.81423 |
| C  | 2.96516  | -1.09022 | 0.78198  |
| F  | 3.08788  | -2.39510 | 0.67430  |
| F  | 4.14358  | -0.55019 | 0.99867  |
| F  | 2.16253  | -0.81016 | 1.79505  |
| C  | -2.19285 | -0.71597 | -1.25682 |
| C  | -3.28334 | -1.55387 | -1.14612 |
| C  | -2.36897 | -0.28506 | 1.11140  |
| H  | -1.70792 | -0.56178 | -2.21351 |
| H  | -2.04419 | 0.22257  | 2.01293  |
| N  | -3.41447 | -1.10272 | 1.20124  |
| C  | -3.83474 | -1.69701 | 0.11999  |
| H  | -3.70000 | -2.07776 | -1.99637 |
| F  | -4.88109 | -2.48547 | 0.25583  |
| Cu | -0.01297 | 0.65826  | -0.24041 |

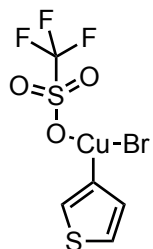

**Copper 13**

M06/def2-TZVP Geometry

|    |          |          |          |
|----|----------|----------|----------|
| Br | 1.38664  | -2.38026 | 0.11270  |
| C  | 1.87176  | 0.48747  | 0.03901  |
| O  | -0.85689 | 1.05971  | -0.70786 |
| S  | -2.10731 | 0.25411  | -0.78814 |

|    |          |          |          |
|----|----------|----------|----------|
| O  | -1.67057 | -1.13758 | -0.61841 |
| O  | -3.00769 | 0.57073  | -1.83116 |
| C  | -2.97104 | 0.65875  | 0.78749  |
| F  | -4.05561 | -0.07687 | 0.89520  |
| F  | -2.16980 | 0.40656  | 1.80915  |
| F  | -3.29828 | 1.93307  | 0.79904  |
| C  | 2.57350  | 0.61655  | 1.25419  |
| C  | 3.46923  | 1.63400  | 1.15999  |
| C  | 2.24426  | 1.30265  | -0.97252 |
| H  | 2.41329  | 0.00541  | 2.12980  |
| H  | 1.86565  | 1.38628  | -1.97884 |
| S  | 3.46451  | 2.35939  | -0.39213 |
| H  | 4.14221  | 1.99851  | 1.92125  |
| Cu | 0.28274  | -0.49660 | -0.24180 |

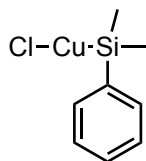

### Copper 14

#### M06/def2-TZVP Geometry

|    |          |          |          |
|----|----------|----------|----------|
| C  | 0.31620  | 2.26566  | 1.48066  |
| Si | 0.00328  | 1.09782  | 0.00001  |
| C  | 0.31620  | 2.26570  | -1.48063 |
| C  | 1.58227  | -0.00199 | -0.00000 |
| C  | 1.49469  | -1.39321 | 0.00002  |
| C  | 2.62434  | -2.19856 | 0.00002  |
| C  | 3.88499  | -1.62570 | -0.00001 |
| C  | 4.00305  | -0.24422 | -0.00003 |
| C  | 2.86589  | 0.54693  | -0.00003 |
| Cl | -3.78658 | -1.20188 | -0.00001 |
| H  | 1.28291  | 2.77664  | 1.40197  |
| H  | -0.46465 | 3.03052  | 1.52433  |
| H  | 0.29624  | 1.72029  | 2.42729  |
| H  | 1.28289  | 2.77669  | -1.40191 |
| H  | 0.29627  | 1.72034  | -2.42726 |
| H  | -0.46467 | 3.03053  | -1.52429 |
| H  | 0.50763  | -1.85068 | 0.00003  |
| H  | 2.51955  | -3.27921 | 0.00004  |
| H  | 4.77208  | -2.25105 | -0.00001 |
| H  | 4.98692  | 0.21585  | -0.00005 |
| H  | 2.98295  | 1.62892  | -0.00004 |
| Cu | -1.93786 | -0.07393 | -0.00000 |

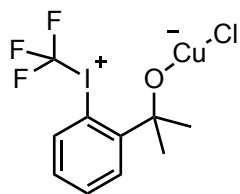

### Copper 15

M06/def2-TZVP Geometry

|    |          |          |          |
|----|----------|----------|----------|
| Cl | -4.29948 | 0.78360  | -0.77073 |
| Cu | -2.33031 | 0.82050  | -0.08063 |
| O  | -0.54308 | 0.68243  | 0.48342  |
| C  | 0.29217  | 1.76893  | 0.58608  |
| C  | -0.13540 | 2.89768  | -0.35449 |
| C  | 0.29624  | 2.26035  | 2.03232  |
| C  | 1.70742  | 1.34572  | 0.17469  |
| C  | 2.00011  | 0.13112  | -0.41340 |
| C  | 3.27395  | -0.26821 | -0.79654 |
| C  | 4.32404  | 0.60519  | -0.60594 |
| C  | 4.07627  | 1.84063  | -0.02764 |
| C  | 2.79807  | 2.19657  | 0.35471  |
| I  | 0.49807  | -1.28101 | -0.85259 |
| C  | -0.20533 | -2.05920 | 1.12821  |
| F  | 0.57709  | -1.57348 | 2.04899  |
| F  | -1.44438 | -1.77340 | 1.35197  |
| F  | -0.05343 | -3.36468 | 1.05021  |
| H  | -1.14323 | 3.22259  | -0.08185 |
| H  | 0.53335  | 3.76090  | -0.30620 |
| H  | -0.16573 | 2.53465  | -1.38544 |
| H  | 0.90488  | 3.15395  | 2.18779  |
| H  | -0.73477 | 2.49638  | 2.30441  |
| H  | 0.65130  | 1.46966  | 2.69682  |
| H  | 3.43994  | -1.24762 | -1.23026 |
| H  | 5.32700  | 0.31870  | -0.89650 |
| H  | 4.89356  | 2.53339  | 0.13514  |
| H  | 2.63201  | 3.16687  | 0.80845  |

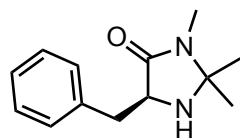

### Amine 1

M06-2X/def2-TZVP Geometry

|   |          |          |         |
|---|----------|----------|---------|
| C | -0.67720 | 0.46392  | 1.43165 |
| N | -0.90534 | -0.93458 | 1.07184 |



|   |          |          |          |
|---|----------|----------|----------|
| C | -1.88911 | -0.94724 | -0.01548 |
| N | -1.76626 | 0.39562  | -0.60643 |
| C | -1.14299 | 1.26641  | 0.21850  |
| O | -0.99269 | 2.45853  | 0.04293  |
| C | -2.44633 | 0.81065  | -1.80613 |
| C | -1.54658 | -2.02571 | -1.02836 |
| C | -3.29102 | -1.14858 | 0.55406  |
| C | 0.76897  | 0.78254  | 1.81804  |
| C | 1.76696  | 0.33795  | 0.77981  |
| C | 1.97024  | 1.08653  | -0.37985 |
| C | 2.85279  | 0.64780  | -1.35614 |
| C | 3.54629  | -0.54461 | -1.19146 |
| C | 3.35518  | -1.29476 | -0.04061 |
| C | 2.47173  | -0.85348 | 0.93649  |
| H | -1.32374 | 0.75027  | 2.26802  |
| H | -0.03560 | -1.31266 | 0.70878  |
| H | -2.07590 | 0.26295  | -2.67424 |
| H | -3.52513 | 0.65727  | -1.72545 |
| H | -2.25022 | 1.87268  | -1.94207 |
| H | -0.57719 | -1.81886 | -1.48639 |
| H | -1.50541 | -2.99219 | -0.52522 |
| H | -2.30226 | -2.08288 | -1.81239 |
| H | -4.05023 | -1.06539 | -0.22505 |
| H | -3.49476 | -0.40098 | 1.32157  |
| H | -3.36132 | -2.13715 | 1.00621  |
| H | 0.82593  | 1.86312  | 1.95957  |
| H | 0.98939  | 0.30410  | 2.77343  |
| H | 1.42928  | 2.01647  | -0.50934 |
| H | 3.00374  | 1.24253  | -2.24800 |
| H | 4.23664  | -0.88286 | -1.95321 |
| H | 3.89658  | -2.22136 | 0.10114  |
| H | 2.32928  | -1.43917 | 1.83827  |

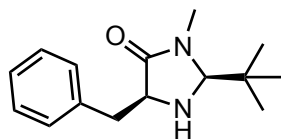

## Amine 2

M06-2X/def2-TZVP Geometry

|   |          |         |          |
|---|----------|---------|----------|
| C | -0.05896 | 1.51318 | 1.34683  |
| N | -0.65001 | 0.19589 | 1.55073  |
| C | -1.76375 | 0.04442 | 0.61671  |
| N | -1.52485 | 1.08010 | -0.39500 |
| C | -0.59241 | 1.98086 | 0.00144  |
| O | -0.27141 | 2.99421 | -0.58432 |

|   |          |          |          |
|---|----------|----------|----------|
| C | -2.43561 | 1.39688  | -1.46883 |
| C | -1.87702 | -1.39743 | 0.07156  |
| C | 1.47069  | 1.53391  | 1.41183  |
| C | 2.10296  | 0.50674  | 0.50882  |
| C | 2.57861  | -0.69646 | 1.02541  |
| C | 3.09902  | -1.67693 | 0.18957  |
| C | 3.15065  | -1.46328 | -1.18001 |
| C | 2.68626  | -0.26385 | -1.70537 |
| C | 2.16689  | 0.71369  | -0.86930 |
| H | -0.44117 | 2.22196  | 2.09006  |
| H | 0.04783  | -0.50592 | 1.33374  |
| H | -3.46888 | 1.30783  | -1.12544 |
| H | -2.23857 | 2.42293  | -1.77546 |
| H | -2.29327 | 0.74149  | -2.32928 |
| H | 1.78427  | 2.53940  | 1.12555  |
| H | 1.78228  | 1.36379  | 2.44345  |
| H | 2.54233  | -0.86515 | 2.09636  |
| H | 3.46512  | -2.60492 | 0.60977  |
| H | 3.55543  | -2.22410 | -1.83457 |
| H | 2.73085  | -0.08786 | -2.77257 |
| H | 1.80339  | 1.64803  | -1.28116 |
| H | -2.70845 | 0.27971  | 1.13049  |
| C | -3.22409 | -1.59966 | -0.63078 |
| H | -4.05364 | -1.31217 | 0.01945  |
| H | -3.30279 | -1.03577 | -1.55801 |
| H | -3.34798 | -2.65480 | -0.88071 |
| C | -1.83245 | -2.36089 | 1.26403  |
| H | -2.03575 | -3.37622 | 0.91976  |
| H | -0.86211 | -2.36448 | 1.76002  |
| H | -2.58652 | -2.09539 | 2.00832  |
| C | -0.74085 | -1.71144 | -0.90265 |
| H | -0.77005 | -1.05378 | -1.77283 |
| H | 0.24659  | -1.60690 | -0.44659 |
| H | -0.83317 | -2.74187 | -1.25148 |

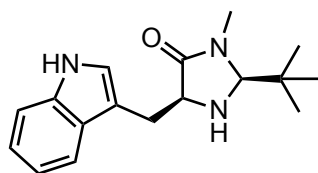

### Amine 3

M06-2X/def2-TZVP Geometry

|   |          |          |         |
|---|----------|----------|---------|
| C | -0.98270 | 1.51963  | 1.50920 |
| N | -1.57265 | 0.18691  | 1.52846 |
| C | -2.25474 | -0.03980 | 0.25527 |

|   |          |          |          |
|---|----------|----------|----------|
| N | -1.71731 | 1.00090  | -0.62862 |
| C | -1.07402 | 1.97171  | 0.06357  |
| O | -0.67409 | 3.03037  | -0.37750 |
| C | -2.18849 | 1.25955  | -1.96890 |
| C | -2.09759 | -1.49401 | -0.24213 |
| C | 0.45418  | 1.58346  | 2.05208  |
| C | 1.34652  | 0.50143  | 1.53004  |
| C | -0.64807 | -1.80757 | -0.61623 |
| C | -2.99998 | -1.74924 | -1.45457 |
| C | -2.56537 | -2.42320 | 0.88437  |
| C | 1.71616  | -0.61809 | 2.21847  |
| N | 2.47553  | -1.43970 | 1.41894  |
| C | 2.61504  | -0.85696 | 0.18443  |
| C | 1.91878  | 0.37015  | 0.21387  |
| C | 3.27571  | -1.31675 | -0.95417 |
| C | 3.23208  | -0.51754 | -2.07667 |
| C | 2.55498  | 0.71406  | -2.06797 |
| C | 1.90344  | 1.16711  | -0.93990 |
| H | -1.59048 | 2.22329  | 2.08820  |
| H | -0.82105 | -0.48722 | 1.61658  |
| H | -3.33344 | 0.14607  | 0.37576  |
| H | -3.25760 | 1.04909  | -2.04055 |
| H | -2.00654 | 2.31119  | -2.18512 |
| H | -1.65770 | 0.65503  | -2.70571 |
| H | 0.84405  | 2.57079  | 1.79392  |
| H | 0.41756  | 1.51971  | 3.14101  |
| H | -0.59360 | -2.80427 | -1.05888 |
| H | 0.01563  | -1.80081 | 0.25112  |
| H | -0.25320 | -1.08941 | -1.33857 |
| H | -4.02083 | -1.40654 | -1.26917 |
| H | -2.63146 | -1.26564 | -2.35691 |
| H | -3.04098 | -2.82137 | -1.65460 |
| H | -3.59428 | -2.19668 | 1.17349  |
| H | -2.52896 | -3.45908 | 0.54266  |
| H | -1.94355 | -2.33808 | 1.77510  |
| H | 1.49588  | -0.89198 | 3.23852  |
| H | 2.89005  | -2.30837 | 1.70381  |
| H | 3.80000  | -2.26396 | -0.95678 |
| H | 3.73257  | -0.84194 | -2.97973 |
| H | 2.55070  | 1.31948  | -2.96481 |
| H | 1.38521  | 2.11737  | -0.94534 |

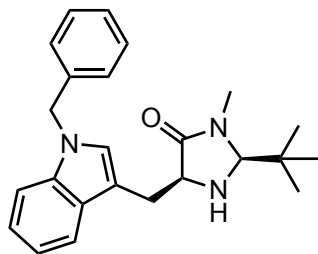

#### Amine 4

##### M06-2X/def2-TZVP Geometry

|   |          |          |          |
|---|----------|----------|----------|
| C | -2.66651 | 0.56637  | -1.58894 |
| N | -2.89290 | 0.46432  | -0.15089 |
| C | -2.81509 | -0.94972 | 0.19653  |
| N | -1.97274 | -1.52516 | -0.86517 |
| C | -1.93316 | -0.71516 | -1.95788 |
| O | -1.43268 | -0.97662 | -3.03204 |
| C | -1.65941 | -2.92764 | -0.99138 |
| C | -2.31905 | -1.17186 | 1.64200  |
| C | -1.88787 | 1.81266  | -2.01053 |
| C | -0.51194 | 1.84235  | -1.42453 |
| C | -2.62150 | -2.60473 | 2.09391  |
| C | -0.81961 | -0.90242 | 1.76824  |
| C | -3.09727 | -0.22215 | 2.56117  |
| C | 0.60700  | 1.28807  | -1.97600 |
| N | 1.67815  | 1.40771  | -1.12345 |
| C | 1.25153  | 2.02069  | 0.02710  |
| C | -0.11653 | 2.33499  | -0.13419 |
| C | 1.94671  | 2.29946  | 1.20297  |
| C | 1.25118  | 2.92333  | 2.21955  |
| C | -0.10326 | 3.26708  | 2.07321  |
| C | -0.79006 | 2.98256  | 0.91011  |
| C | 2.98748  | 0.83707  | -1.32383 |
| C | 3.21320  | -0.44341 | -0.54827 |
| C | 2.17006  | -1.33686 | -0.32904 |
| C | 2.40255  | -2.52448 | 0.34937  |
| C | 3.67442  | -2.83088 | 0.81438  |
| C | 4.71628  | -1.93988 | 0.60171  |
| C | 4.48325  | -0.75073 | -0.07476 |
| H | -3.62664 | 0.54721  | -2.11784 |
| H | -2.13129 | 0.93965  | 0.32258  |
| H | -3.81916 | -1.39433 | 0.11664  |
| H | -0.85344 | -3.22406 | -0.31831 |
| H | -2.53912 | -3.53929 | -0.77403 |
| H | -1.34175 | -3.10137 | -2.01840 |
| H | -1.82828 | 1.80570  | -3.09935 |

|   |          |          |          |
|---|----------|----------|----------|
| H | -2.45519 | 2.69852  | -1.71663 |
| H | -2.05863 | -3.35021 | 1.53478  |
| H | -2.35577 | -2.71747 | 3.14647  |
| H | -3.68549 | -2.83071 | 1.99266  |
| H | -0.54013 | 0.10063  | 1.43559  |
| H | -0.51748 | -0.99319 | 2.81339  |
| H | -0.23690 | -1.61943 | 1.18972  |
| H | -2.83047 | 0.82087  | 2.39136  |
| H | -2.87468 | -0.46195 | 3.60232  |
| H | -4.17387 | -0.32304 | 2.40798  |
| H | 0.71603  | 0.78674  | -2.92590 |
| H | 2.98606  | 2.02007  | 1.32242  |
| H | 1.75730  | 3.14973  | 3.14865  |
| H | -0.61351 | 3.76096  | 2.88966  |
| H | -1.83712 | 3.24700  | 0.81080  |
| H | 3.74471  | 1.57447  | -1.04736 |
| H | 3.09896  | 0.64906  | -2.39349 |
| H | 1.17214  | -1.09753 | -0.68488 |
| H | 1.58665  | -3.21614 | 0.51889  |
| H | 3.85080  | -3.75744 | 1.34475  |
| H | 5.70909  | -2.16645 | 0.96824  |
| H | 5.29671  | -0.05133 | -0.23311 |

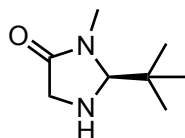

### Amine 5

#### M06-2X/def2-TZVP Geometry

|   |          |          |          |
|---|----------|----------|----------|
| C | -1.71654 | -1.57003 | -0.17209 |
| N | -0.26056 | -1.62934 | -0.23152 |
| C | 0.20091  | -0.27669 | -0.53409 |
| N | -0.88762 | 0.58524  | -0.05558 |
| C | -2.05432 | -0.11175 | 0.08027  |
| C | -0.92765 | 2.01759  | -0.23346 |
| O | -3.14662 | 0.35520  | 0.30681  |
| C | 1.59669  | 0.01413  | 0.05688  |
| C | 2.52571  | -1.14104 | -0.33449 |
| C | 1.53885  | 0.15275  | 1.57797  |
| C | 2.17893  | 1.29747  | -0.54607 |
| H | -2.16583 | -1.85632 | -1.12734 |
| H | -2.13023 | -2.21448 | 0.60012  |
| H | 0.09249  | -1.89226 | 0.68041  |
| H | 0.27634  | -0.16550 | -1.62716 |

|   |          |          |          |
|---|----------|----------|----------|
| H | -0.51895 | 2.29313  | -1.20915 |
| H | -1.97075 | 2.32484  | -0.17661 |
| H | -0.36626 | 2.53934  | 0.54255  |
| H | 2.53057  | -1.28472 | -1.41710 |
| H | 3.54463  | -0.91447 | -0.01631 |
| H | 2.22884  | -2.08437 | 0.12197  |
| H | 2.53932  | 0.35175  | 1.96617  |
| H | 0.88670  | 0.97379  | 1.87815  |
| H | 1.17825  | -0.75506 | 2.06601  |
| H | 1.65156  | 2.19184  | -0.22098 |
| H | 3.22044  | 1.40284  | -0.23742 |
| H | 2.15757  | 1.26211  | -1.63761 |

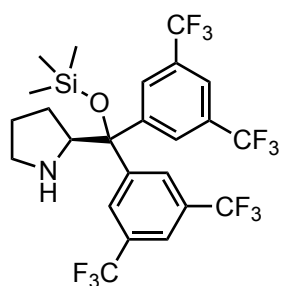

### Amine 6

M06-2X/def2-TZVP Geometry

|    |          |          |          |
|----|----------|----------|----------|
| N  | 1.26045  | 2.57070  | -1.90877 |
| C  | 0.18987  | 1.59382  | -1.80344 |
| C  | 0.48622  | 0.59623  | -2.93405 |
| C  | 2.00832  | 0.64184  | -3.11432 |
| C  | 2.38396  | 2.07292  | -2.71230 |
| C  | 0.07265  | 0.98357  | -0.37011 |
| O  | 0.12379  | 2.04680  | 0.56176  |
| C  | -1.23006 | 0.21282  | -0.15561 |
| C  | 1.27403  | 0.09026  | -0.09091 |
| C  | -1.43877 | -0.35835 | 1.09923  |
| C  | -2.62142 | -1.00916 | 1.39369  |
| C  | -3.63151 | -1.11301 | 0.44616  |
| C  | -3.42182 | -0.55538 | -0.80017 |
| C  | -2.23257 | 0.10039  | -1.10674 |
| C  | 1.26097  | -1.26571 | -0.39788 |
| C  | 2.41076  | -2.02901 | -0.26380 |
| C  | 3.59393  | -1.46529 | 0.18495  |
| C  | 2.44992  | 0.65091  | 0.39282  |
| Si | -0.95796 | 3.26688  | 0.93769  |
| C  | -1.61177 | 4.11472  | -0.59141 |
| C  | -2.39389 | 2.62234  | 1.94007  |
| C  | 0.07896  | 4.43596  | 1.94688  |

|   |          |          |          |
|---|----------|----------|----------|
| H | 1.52408  | 2.96304  | -1.01749 |
| H | -0.76397 | 2.09393  | -1.98405 |
| H | -0.00750 | 0.94613  | -3.84209 |
| H | 0.11546  | -0.40812 | -2.72857 |
| H | 2.49757  | -0.07962 | -2.46028 |
| H | 2.30316  | 0.40886  | -4.13598 |
| H | 2.51276  | 2.70289  | -3.59580 |
| H | 3.31961  | 2.09949  | -2.14970 |
| H | -0.66750 | -0.27178 | 1.85682  |
| C | -2.78868 | -1.60458 | 2.76600  |
| H | -4.55844 | -1.61706 | 0.67876  |
| H | -2.11333 | 0.51720  | -2.09815 |
| H | 0.35257  | -1.73971 | -0.75053 |
| C | 2.34615  | -3.48149 | -0.64972 |
| H | 4.48884  | -2.06231 | 0.28457  |
| H | 2.46559  | 1.69366  | 0.68109  |
| H | -2.35744 | 3.50681  | -1.10862 |
| H | -2.10101 | 5.04673  | -0.29746 |
| H | -0.81213 | 4.35704  | -1.29472 |
| H | -3.07161 | 2.01085  | 1.34055  |
| H | -2.06272 | 2.02742  | 2.79324  |
| H | -2.96735 | 3.46912  | 2.32569  |
| H | -0.51907 | 5.27618  | 2.30461  |
| H | 0.50348  | 3.92922  | 2.81505  |
| H | 0.90214  | 4.83946  | 1.35392  |
| F | 1.35418  | -4.11462 | -0.01407 |
| F | 2.11393  | -3.62217 | -1.96253 |
| F | 3.47881  | -4.12958 | -0.37496 |
| C | 3.59531  | -0.12099 | 0.51900  |
| C | 4.84556  | 0.54633  | 1.02373  |
| F | 5.87679  | -0.29630 | 1.09581  |
| F | 5.21153  | 1.55822  | 0.22382  |
| F | 4.66582  | 1.06712  | 2.24289  |
| F | -2.54078 | -0.70003 | 3.72141  |
| F | -4.02229 | -2.07088 | 2.96588  |
| F | -1.93943 | -2.61879 | 2.96453  |
| C | -4.47800 | -0.63399 | -1.86884 |
| F | -4.86599 | 0.58752  | -2.25853 |
| F | -4.01997 | -1.25800 | -2.96111 |
| F | -5.56527 | -1.28756 | -1.45987 |

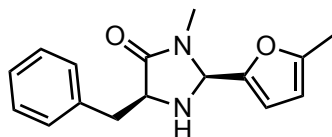

### Amine 7

#### M06-2X/def2-TZVP Geometry

|   |          |          |          |
|---|----------|----------|----------|
| C | 1.49326  | -1.61482 | -1.16616 |
| N | 0.23758  | -1.02676 | -1.62610 |
| C | -0.82074 | -1.39424 | -0.68343 |
| N | -0.11062 | -1.94179 | 0.46731  |
| C | 1.20677  | -2.12711 | 0.24088  |
| O | 2.01431  | -2.61803 | 1.00245  |
| C | -0.80107 | -2.40320 | 1.64245  |
| C | -1.67884 | -0.23085 | -0.31227 |
| C | 2.68217  | -0.64840 | -1.18763 |
| C | 2.41302  | 0.63750  | -0.44892 |
| C | 2.43682  | 0.67700  | 0.94614  |
| C | 2.14984  | 1.85330  | 1.62338  |
| C | 1.83481  | 3.01005  | 0.92011  |
| C | 1.81035  | 2.98309  | -0.46651 |
| C | 2.09757  | 1.80358  | -1.14255 |
| O | -3.02161 | -0.38159 | -0.44513 |
| C | -3.60579 | 0.77247  | -0.03685 |
| C | -2.65244 | 1.65174  | 0.35636  |
| C | -1.39200 | 0.99675  | 0.17904  |
| C | -5.08573 | 0.83387  | -0.10579 |
| H | 1.75495  | -2.48823 | -1.77244 |
| H | 0.31047  | -0.01689 | -1.64525 |
| H | -1.47326 | -2.17001 | -1.10394 |
| H | -0.06200 | -2.83712 | 2.31275  |
| H | -1.30659 | -1.57252 | 2.13837  |
| H | -1.54363 | -3.16116 | 1.37953  |
| H | 3.52404  | -1.17674 | -0.73647 |
| H | 2.93895  | -0.43205 | -2.22593 |
| H | 2.68641  | -0.22259 | 1.49656  |
| H | 2.17673  | 1.86844  | 2.70542  |
| H | 1.61489  | 3.92719  | 1.45093  |
| H | 1.57005  | 3.87898  | -1.02435 |
| H | 2.08526  | 1.78976  | -2.22710 |
| H | -2.82625 | 2.64768  | 0.72736  |
| H | -0.40720 | 1.38263  | 0.39691  |
| H | -5.42772 | 1.80280  | 0.25167  |
| H | -5.43483 | 0.69701  | -1.13038 |
| H | -5.53860 | 0.05524  | 0.50987  |



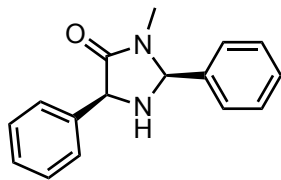

### Amine 8

M06-2X/def2-TZVP Geometry

|   |          |          |          |
|---|----------|----------|----------|
| N | -0.03422 | -0.07755 | -1.21003 |
| C | 1.15878  | 0.69953  | -0.88153 |
| N | 0.69389  | 1.69121  | 0.08086  |
| C | -0.65731 | 1.84054  | 0.05430  |
| C | -1.19531 | 0.76989  | -0.89750 |
| C | -2.35036 | -0.03674 | -0.36939 |
| C | 2.26795  | -0.17091 | -0.34597 |
| C | 1.57673  | 2.68356  | 0.64000  |
| O | -1.29809 | 2.68195  | 0.64096  |
| C | 3.34023  | -0.51860 | -1.15555 |
| C | 4.33832  | -1.35725 | -0.67653 |
| C | 4.26936  | -1.84711 | 0.61913  |
| C | 3.19989  | -1.49859 | 1.43531  |
| C | 2.20296  | -0.66463 | 0.95384  |
| C | -3.16242 | -0.72329 | -1.26722 |
| C | -4.19029 | -1.53434 | -0.81076 |
| C | -4.41771 | -1.66350 | 0.55281  |
| C | -3.61425 | -0.97906 | 1.45336  |
| C | -2.58389 | -0.16922 | 0.99548  |
| H | -0.06140 | -0.90166 | -0.61831 |
| H | 1.51986  | 1.21851  | -1.78040 |
| H | -1.51116 | 1.29905  | -1.80409 |
| H | 2.31057  | 2.21833  | 1.29933  |
| H | 2.10858  | 3.21740  | -0.15310 |
| H | 0.96986  | 3.38951  | 1.20328  |
| H | 3.39101  | -0.13359 | -2.16723 |
| H | 5.16997  | -1.62542 | -1.31489 |
| H | 5.04840  | -2.49718 | 0.99546  |
| H | 3.14573  | -1.87556 | 2.44833  |
| H | 1.36926  | -0.38206 | 1.58776  |
| H | -2.98026 | -0.62116 | -2.33064 |
| H | -4.81612 | -2.06212 | -1.51864 |
| H | -5.22283 | -2.29131 | 0.91189  |
| H | -3.79407 | -1.06833 | 2.51686  |
| H | -1.97657 | 0.38266  | 1.70216  |

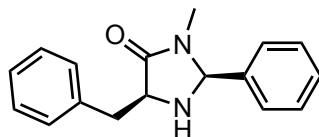

### Amine 9

M06-2X/def2-TZVP Geometry

|   |          |          |          |
|---|----------|----------|----------|
| N | 0.12181  | -1.16743 | -1.59164 |
| C | -0.83568 | -1.60703 | -0.57321 |
| N | -0.01134 | -1.94156 | 0.58015  |
| C | 1.30723  | -2.00180 | 0.28774  |
| C | 1.46255  | -1.56127 | -1.16370 |
| C | -1.86293 | -0.54266 | -0.26721 |
| C | -0.57830 | -2.43473 | 1.80842  |
| O | 2.20162  | -2.35006 | 1.02989  |
| C | -3.18381 | -0.70096 | -0.66169 |
| C | -4.11540 | 0.30006  | -0.41429 |
| C | -3.72608 | 1.46341  | 0.23215  |
| C | -2.40415 | 1.62476  | 0.63211  |
| C | -1.47600 | 0.62629  | 0.38489  |
| H | 0.06447  | -0.15868 | -1.66334 |
| H | -1.35799 | -2.51361 | -0.90754 |
| H | 1.80537  | -2.43580 | -1.72630 |
| H | -1.21705 | -3.30114 | 1.61576  |
| H | 0.24273  | -2.72883 | 2.45901  |
| H | -1.17549 | -1.66124 | 2.29382  |
| H | -3.48380 | -1.61064 | -1.16881 |
| H | -5.14329 | 0.17003  | -0.72692 |
| H | -4.45051 | 2.24365  | 0.42671  |
| H | -2.09374 | 2.52991  | 1.13846  |
| H | -0.44508 | 0.74999  | 0.70168  |
| C | 2.51756  | -0.45768 | -1.30868 |
| H | 2.66076  | -0.24934 | -2.37043 |
| H | 3.45203  | -0.86099 | -0.91529 |
| C | 1.30785  | 3.09164  | 0.80443  |
| C | 1.93121  | 2.05079  | 1.48233  |
| C | 2.34481  | 0.91677  | 0.79781  |
| C | 2.14243  | 0.80556  | -0.57843 |
| C | 1.53027  | 1.86211  | -1.24887 |
| C | 1.11100  | 2.99633  | -0.56531 |
| H | 0.98649  | 3.97536  | 1.34053  |
| H | 2.09740  | 2.12254  | 2.54961  |
| H | 2.82153  | 0.10174  | 1.32932  |
| H | 1.38219  | 1.79720  | -2.32171 |
| H | 0.63224  | 3.80374  | -1.10421 |

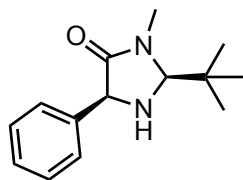

### Amine 10

#### M06-2X/def2-TZVP Geometry

|   |          |          |          |
|---|----------|----------|----------|
| N | 0.34513  | -0.57551 | -1.02415 |
| C | -0.62779 | 0.52064  | -0.99221 |
| C | 0.07163  | 1.63699  | -0.22113 |
| N | 1.35540  | 1.23213  | -0.00826 |
| C | 1.65692  | -0.02795 | -0.69389 |
| C | 2.35530  | 2.19757  | 0.38441  |
| O | -0.40656 | 2.69904  | 0.10276  |
| C | 2.52416  | -1.02932 | 0.10060  |
| C | 3.97912  | -0.55123 | 0.15994  |
| C | 2.51013  | -2.36715 | -0.64863 |
| C | 1.99400  | -1.21217 | 1.52238  |
| H | 0.07637  | -1.25727 | -0.32465 |
| H | -0.79587 | 0.90198  | -2.00522 |
| H | 2.19596  | 0.20735  | -1.62486 |
| H | 1.87005  | 3.17092  | 0.43675  |
| H | 2.78121  | 1.96676  | 1.36173  |
| H | 3.16156  | 2.22848  | -0.35248 |
| H | 4.10564  | 0.33329  | 0.78072  |
| H | 4.60264  | -1.33954 | 0.58523  |
| H | 4.35999  | -0.32904 | -0.83948 |
| H | 1.52262  | -2.82668 | -0.66272 |
| H | 2.82864  | -2.23418 | -1.68484 |
| H | 3.19965  | -3.06261 | -0.16735 |
| H | 0.96806  | -1.58659 | 1.53971  |
| H | 2.61295  | -1.93616 | 2.05526  |
| H | 2.01559  | -0.27237 | 2.07625  |
| C | -4.33615 | -0.80068 | 0.71323  |
| C | -3.27573 | -0.44762 | 1.53815  |
| C | -2.08570 | -0.00059 | 0.98548  |
| C | -1.94231 | 0.09753  | -0.39634 |
| C | -3.00827 | -0.25429 | -1.21452 |
| C | -4.20141 | -0.70218 | -0.66373 |
| H | -5.26698 | -1.14542 | 1.14440  |
| H | -3.38058 | -0.51097 | 2.61346  |
| H | -1.26513 | 0.29423  | 1.63104  |
| H | -2.90095 | -0.17657 | -2.28981 |
| H | -5.02611 | -0.97154 | -1.31073 |

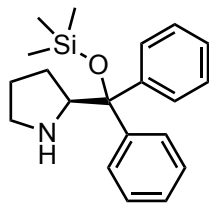

## Amine 11

### M06-2X/def2-TZVP Geometry

|    |          |          |          |
|----|----------|----------|----------|
| N  | 1.46732  | -0.59226 | -1.73687 |
| C  | 0.09982  | -0.90196 | -1.34406 |
| C  | 0.14452  | -2.41783 | -1.09667 |
| C  | 1.32859  | -2.92713 | -1.94617 |
| C  | 1.88571  | -1.67072 | -2.62798 |
| C  | -0.34120 | -0.09362 | -0.10739 |
| O  | 0.50816  | -0.36567 | 0.97544  |
| C  | -0.37383 | 1.41748  | -0.36309 |
| C  | -1.75169 | -0.55725 | 0.26991  |
| C  | -0.44207 | 2.26322  | 0.74355  |
| C  | -0.49705 | 3.63738  | 0.58810  |
| C  | -0.48967 | 4.19744  | -0.68444 |
| C  | -0.44040 | 3.36783  | -1.79177 |
| C  | -0.38834 | 1.98646  | -1.63146 |
| C  | -2.83062 | -0.25709 | -0.55933 |
| C  | -4.10367 | -0.71420 | -0.25726 |
| C  | -4.31874 | -1.47362 | 0.88574  |
| C  | -3.25124 | -1.76694 | 1.71996  |
| C  | -1.97374 | -1.31292 | 1.41399  |
| Si | 2.11920  | -0.14897 | 1.31229  |
| C  | 3.14158  | -1.64933 | 0.86831  |
| C  | 2.86567  | 1.40389  | 0.59116  |
| C  | 2.11761  | 0.00787  | 3.17697  |
| H  | 1.55415  | 0.32188  | -2.16337 |
| H  | -0.61813 | -0.70293 | -2.15324 |
| H  | 0.31858  | -2.60805 | -0.03812 |
| H  | -0.80191 | -2.88428 | -1.36389 |
| H  | 2.08615  | -3.37985 | -1.30838 |
| H  | 1.02611  | -3.67356 | -2.67864 |
| H  | 1.45125  | -1.56505 | -3.63171 |
| H  | 2.97165  | -1.68673 | -2.73139 |
| H  | -0.44826 | 1.82523  | 1.73452  |
| H  | -0.54691 | 4.27574  | 1.46096  |
| H  | -0.52851 | 5.27169  | -0.80866 |
| H  | -0.44304 | 3.79062  | -2.78827 |
| H  | -0.36712 | 1.36232  | -2.51637 |
| H  | -2.67848 | 0.35512  | -1.44071 |

|   |          |          |          |
|---|----------|----------|----------|
| H | -4.93121 | -0.47035 | -0.91107 |
| H | -5.31298 | -1.82745 | 1.12558  |
| H | -3.40961 | -2.35274 | 2.61655  |
| H | -1.14025 | -1.53913 | 2.06392  |
| H | 4.07795  | -1.63695 | 1.43180  |
| H | 2.61281  | -2.56945 | 1.12871  |
| H | 3.37620  | -1.67395 | -0.19495 |
| H | 2.83534  | 1.41373  | -0.49726 |
| H | 2.36146  | 2.29964  | 0.95637  |
| H | 3.91334  | 1.45808  | 0.90011  |
| H | 1.53122  | 0.87168  | 3.49669  |
| H | 1.68537  | -0.88052 | 3.64213  |
| H | 3.13216  | 0.12829  | 3.56272  |

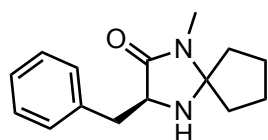

### Amine 12

#### M06-2X/def2-TZVP Geometry

|   |          |          |          |
|---|----------|----------|----------|
| C | -0.17616 | 0.76410  | 1.42630  |
| N | -0.75916 | -0.48406 | 0.93568  |
| C | -1.70490 | -0.11230 | -0.12036 |
| N | -1.20940 | 1.17857  | -0.59917 |
| C | -0.37050 | 1.76361  | 0.28686  |
| C | 1.28496  | 0.64654  | 1.86230  |
| O | 0.11685  | 2.87268  | 0.20801  |
| C | -1.72140 | 1.86741  | -1.75579 |
| C | -3.13004 | -0.06138 | 0.44431  |
| C | -3.54071 | -1.53841 | 0.53255  |
| C | -2.65192 | -2.28814 | -0.49781 |
| C | -1.80855 | -1.20254 | -1.17985 |
| C | 2.16782  | 0.02917  | 0.80831  |
| C | 2.51299  | -1.31895 | 0.87342  |
| C | 3.28700  | -1.90668 | -0.11907 |
| C | 3.72817  | -1.14840 | -1.19346 |
| C | 3.39355  | 0.19784  | -1.26655 |
| C | 2.61956  | 0.78309  | -0.27503 |
| H | -0.75695 | 1.14016  | 2.27557  |
| H | -0.01554 | -1.02968 | 0.50888  |
| H | 1.62560  | 1.65664  | 2.09612  |
| H | 1.33045  | 0.05384  | 2.77705  |
| H | -1.29609 | 2.86944  | -1.75412 |
| H | -1.43328 | 1.35838  | -2.67704 |
| H | -2.81045 | 1.94243  | -1.72026 |

|   |          |          |          |
|---|----------|----------|----------|
| H | -3.15777 | 0.45508  | 1.40382  |
| H | -3.77450 | 0.48107  | -0.25124 |
| H | -3.35029 | -1.91965 | 1.53387  |
| H | -4.60208 | -1.67180 | 0.32867  |
| H | -2.00409 | -2.99786 | 0.01526  |
| H | -3.24037 | -2.85204 | -1.21976 |
| H | -2.33779 | -0.79754 | -2.04536 |
| H | -0.82735 | -1.54255 | -1.51651 |
| H | 2.17402  | -1.91274 | 1.71540  |
| H | 3.54876  | -2.95471 | -0.04882 |
| H | 4.33490  | -1.60143 | -1.96671 |
| H | 3.74123  | 0.79716  | -2.09832 |
| H | 2.35773  | 1.83296  | -0.33296 |

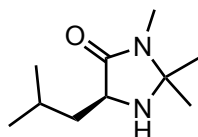

### Amine 13

#### M06-2X/def2-TZVP Geometry

|   |          |          |          |
|---|----------|----------|----------|
| N | -0.15384 | -1.01162 | -0.17529 |
| C | -1.61171 | -0.88339 | -0.09239 |
| N | -1.82717 | 0.57203  | -0.12332 |
| C | -0.70893 | 1.25924  | 0.22553  |
| C | 0.40571  | 0.22721  | 0.37362  |
| C | -2.27976 | -1.56641 | -1.27210 |
| C | -2.10402 | -1.46922 | 1.22914  |
| C | -3.12508 | 1.19126  | -0.20035 |
| O | -0.61664 | 2.45505  | 0.39718  |
| C | 1.69133  | 0.66497  | -0.30206 |
| C | 2.82066  | -0.36590 | -0.24508 |
| C | 3.12868  | -0.79359 | 1.18624  |
| C | 4.06570  | 0.19958  | -0.92129 |
| H | 0.10387  | -1.06177 | -1.15729 |
| H | 0.58102  | 0.10576  | 1.44824  |
| H | -1.99350 | -1.07987 | -2.20618 |
| H | -1.97367 | -2.61233 | -1.30442 |
| H | -3.36572 | -1.53225 | -1.18023 |
| H | -1.56927 | -1.01700 | 2.06504  |
| H | -3.17200 | -1.29165 | 1.36307  |
| H | -1.92397 | -2.54349 | 1.24255  |
| H | -2.98108 | 2.26505  | -0.09391 |
| H | -3.60115 | 0.98677  | -1.16079 |
| H | -3.78247 | 0.84223  | 0.60015  |
| H | 1.47163  | 0.91033  | -1.34756 |

|   |         |          |          |
|---|---------|----------|----------|
| H | 2.01313 | 1.59678  | 0.17174  |
| H | 2.50259 | -1.25549 | -0.79905 |
| H | 3.35310 | 0.07842  | 1.80702  |
| H | 2.29050 | -1.32851 | 1.63413  |
| H | 3.99638 | -1.45450 | 1.21203  |
| H | 4.43144 | 1.07203  | -0.37380 |
| H | 4.86831 | -0.53876 | -0.94970 |
| H | 3.85561 | 0.51242  | -1.94569 |

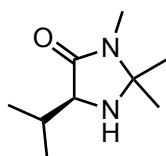

### Amine 14

M06-2X/def2-TZVP Geometry

|   |          |          |          |
|---|----------|----------|----------|
| N | 0.12181  | -1.16743 | -1.59164 |
| C | -0.83568 | -1.60703 | -0.57321 |
| N | -0.01134 | -1.94156 | 0.58015  |
| C | 1.30723  | -2.00180 | 0.28774  |
| C | 1.46255  | -1.56127 | -1.16370 |
| C | -1.86293 | -0.54266 | -0.26721 |
| C | -0.57830 | -2.43473 | 1.80842  |
| O | 2.20162  | -2.35006 | 1.02989  |
| C | -3.18381 | -0.70096 | -0.66169 |
| C | -4.11540 | 0.30006  | -0.41429 |
| C | -3.72608 | 1.46341  | 0.23215  |
| C | -2.40415 | 1.62476  | 0.63211  |
| C | -1.47600 | 0.62629  | 0.38489  |
| H | 0.06447  | -0.15868 | -1.66334 |
| H | -1.35799 | -2.51361 | -0.90754 |
| H | 1.80537  | -2.43580 | -1.72630 |
| H | -1.21705 | -3.30114 | 1.61576  |
| H | 0.24273  | -2.72883 | 2.45901  |
| H | -1.17549 | -1.66124 | 2.29382  |
| H | -3.48380 | -1.61064 | -1.16881 |
| H | -5.14329 | 0.17003  | -0.72692 |
| H | -4.45051 | 2.24365  | 0.42671  |
| H | -2.09374 | 2.52991  | 1.13846  |
| H | -0.44508 | 0.74999  | 0.70168  |
| C | 2.51756  | -0.45768 | -1.30868 |
| H | 2.66076  | -0.24934 | -2.37043 |
| H | 3.45203  | -0.86099 | -0.91529 |
| C | 1.30785  | 3.09164  | 0.80443  |
| C | 1.93121  | 2.05079  | 1.48233  |

|   |         |         |          |
|---|---------|---------|----------|
| C | 2.34481 | 0.91677 | 0.79781  |
| C | 2.14243 | 0.80556 | -0.57843 |
| C | 1.53027 | 1.86211 | -1.24887 |
| C | 1.11100 | 2.99633 | -0.56531 |
| H | 0.98649 | 3.97536 | 1.34053  |
| H | 2.09740 | 2.12254 | 2.54961  |
| H | 2.82153 | 0.10174 | 1.32932  |
| H | 1.38219 | 1.79720 | -2.32171 |
| H | 0.63224 | 3.80374 | -1.10421 |

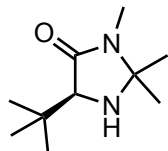

### Amine 15

M06-2X/def2-TZVP Geometry

|   |          |          |          |
|---|----------|----------|----------|
| N | 0.23030  | -1.21380 | -0.11003 |
| C | 1.60913  | -0.71656 | -0.05279 |
| N | 1.38785  | 0.71636  | 0.07998  |
| C | 0.13629  | 1.10746  | -0.26362 |
| C | -0.65837 | -0.15482 | -0.58387 |
| C | 2.32024  | -1.28383 | 1.16778  |
| C | 2.39314  | -1.02605 | -1.33173 |
| C | 2.43723  | 1.65092  | 0.39513  |
| O | -0.25743 | 2.25325  | -0.31324 |
| C | -2.05631 | -0.20952 | 0.06806  |
| C | -2.97845 | 0.80248  | -0.61289 |
| C | -1.95231 | 0.09130  | 1.56234  |
| C | -2.61995 | -1.61721 | -0.13386 |
| H | 0.16979  | -2.05063 | -0.67444 |
| H | -0.79579 | -0.17230 | -1.67626 |
| H | 1.78059  | -0.99840 | 2.07018  |
| H | 2.33626  | -2.37219 | 1.10206  |
| H | 3.35125  | -0.93103 | 1.23016  |
| H | 1.86278  | -0.63593 | -2.20185 |
| H | 3.38970  | -0.58316 | -1.30386 |
| H | 2.51293  | -2.10530 | -1.44402 |
| H | 2.01383  | 2.65054  | 0.32415  |
| H | 2.81464  | 1.49150  | 1.40663  |
| H | 3.26788  | 1.56482  | -0.30933 |
| H | -3.07973 | 0.57962  | -1.67832 |
| H | -3.97343 | 0.75260  | -0.16553 |
| H | -2.59533 | 1.81603  | -0.50918 |
| H | -1.23875 | -0.58349 | 2.03866  |



|   |          |          |          |
|---|----------|----------|----------|
| H | -1.63235 | 1.12115  | 1.73034  |
| H | -2.92449 | -0.04326 | 2.04046  |
| H | -2.01948 | -2.36067 | 0.39229  |
| H | -3.63951 | -1.67030 | 0.25249  |
| H | -2.65223 | -1.87850 | -1.19568 |

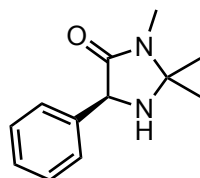

### Amine 16

#### M06-2X/def2-TZVP Geometry

|   |          |          |          |
|---|----------|----------|----------|
| N | 0.88018  | -0.94313 | -1.11585 |
| C | 1.85181  | -0.81546 | -0.02170 |
| N | 1.90751  | 0.63275  | 0.21078  |
| C | 0.85041  | 1.29051  | -0.32402 |
| C | 0.03424  | 0.25122  | -1.10373 |
| C | 1.34850  | -1.53902 | 1.22556  |
| C | 3.20390  | -1.35872 | -0.45223 |
| C | 2.82375  | 1.26266  | 1.12717  |
| O | 0.60374  | 2.47122  | -0.21015 |
| H | 1.38473  | -0.98085 | -1.99226 |
| H | -0.09980 | 0.62940  | -2.11909 |
| H | 0.36873  | -1.15876 | 1.51428  |
| H | 1.26090  | -2.60526 | 1.01724  |
| H | 2.03909  | -1.40362 | 2.05937  |
| H | 3.91852  | -1.32590 | 0.37030  |
| H | 3.09312  | -2.39822 | -0.76276 |
| H | 3.60207  | -0.77573 | -1.28458 |
| H | 3.85593  | 1.13671  | 0.79627  |
| H | 2.58261  | 2.32364  | 1.15194  |
| H | 2.72208  | 0.85317  | 2.13496  |
| C | -3.89686 | -0.33578 | 0.56698  |
| C | -3.42394 | 0.94568  | 0.31552  |
| C | -2.15551 | 1.13321  | -0.21272 |
| C | -1.34239 | 0.03606  | -0.49173 |
| C | -1.82091 | -1.24501 | -0.24430 |
| C | -3.09221 | -1.42928 | 0.28442  |
| H | -4.88730 | -0.47985 | 0.97899  |
| H | -4.04547 | 1.80509  | 0.53205  |
| H | -1.78231 | 2.13182  | -0.40006 |
| H | -1.18772 | -2.09288 | -0.46889 |
| H | -3.45365 | -2.43215 | 0.47353  |

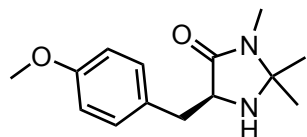

### Amine 17

#### M06-2X/def2-TZVP Geometry

|   |          |          |          |
|---|----------|----------|----------|
| N | -1.73994 | -0.65534 | -1.19456 |
| C | -2.39211 | 0.61673  | -0.86866 |
| N | -2.18216 | 0.74918  | 0.58258  |
| C | -1.84634 | -0.42447 | 1.16371  |
| C | -1.68870 | -1.44245 | 0.03656  |
| C | -1.73499 | 1.75897  | -1.62368 |
| C | -3.88358 | 0.53193  | -1.18256 |
| C | -2.53442 | 1.92102  | 1.34159  |
| O | -1.70993 | -0.63711 | 2.35165  |
| H | -0.78544 | -0.45134 | -1.47519 |
| H | -2.55171 | -2.11461 | 0.09243  |
| H | -1.78166 | 1.55726  | -2.69421 |
| H | -2.24724 | 2.70254  | -1.43294 |
| H | -0.68979 | 1.85715  | -1.32330 |
| H | -4.02298 | 0.41541  | -2.25666 |
| H | -4.32387 | -0.33028 | -0.68036 |
| H | -4.40826 | 1.43153  | -0.85729 |
| H | -1.91489 | 2.77283  | 1.05603  |
| H | -3.58509 | 2.18565  | 1.20019  |
| H | -2.36659 | 1.69229  | 2.39251  |
| C | -0.41774 | -2.28114 | 0.18779  |
| H | -0.43737 | -3.08051 | -0.55475 |
| H | -0.45982 | -2.74081 | 1.17663  |
| C | 3.14698  | 0.10173  | -0.27815 |
| C | 2.46697  | 0.09212  | 0.93557  |
| C | 1.32752  | -0.69168 | 1.08137  |
| C | 0.84604  | -1.47416 | 0.03817  |
| C | 1.54642  | -1.45322 | -1.16960 |
| C | 2.67945  | -0.67863 | -1.33367 |
| O | 4.26680  | 0.82844  | -0.52371 |
| H | 2.81255  | 0.68093  | 1.77284  |
| H | 0.80096  | -0.69263 | 2.02858  |
| H | 1.19745  | -2.06252 | -1.99649 |
| H | 3.22543  | -0.66626 | -2.26762 |
| C | 4.77843  | 1.61816  | 0.52506  |
| H | 5.05581  | 1.00293  | 1.38530  |
| H | 4.05440  | 2.37398  | 0.84178  |
| H | 5.66435  | 2.10949  | 0.13192  |

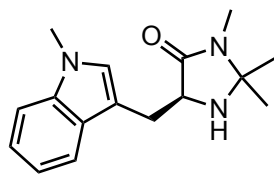

### Amine 18

#### M06-2X/def2-TZVP Geometry

|   |          |          |          |
|---|----------|----------|----------|
| N | -1.60842 | -1.63530 | -0.20551 |
| C | -2.11651 | -0.57452 | -1.09020 |
| N | -2.23601 | 0.58855  | -0.20538 |
| C | -2.05897 | 0.29133  | 1.09696  |
| C | -1.65896 | -1.17293 | 1.17864  |
| C | -2.58165 | 1.90918  | -0.66330 |
| C | -1.13216 | -0.30051 | -2.21897 |
| C | -3.48793 | -0.96301 | -1.63701 |
| O | -2.17798 | 1.04860  | 2.04064  |
| C | -0.33035 | -1.33651 | 1.94471  |
| C | 0.87489  | -0.96478 | 1.13927  |
| C | 1.76623  | -1.85155 | 0.60384  |
| N | 2.70948  | -1.20329 | -0.15602 |
| C | 2.43470  | 0.13876  | -0.12630 |
| C | 1.29116  | 0.33601  | 0.68078  |
| C | 3.10333  | 1.19075  | -0.75324 |
| C | 2.60513  | 2.46237  | -0.55791 |
| C | 1.47750  | 2.68509  | 0.25000  |
| C | 0.82033  | 1.64287  | 0.87241  |
| C | 3.81984  | -1.80613 | -0.84932 |
| H | -0.64153 | -1.81745 | -0.44833 |
| H | -2.43916 | -1.69058 | 1.74487  |
| H | -2.70615 | 2.53742  | 0.21690  |
| H | -1.78663 | 2.32316  | -1.28752 |
| H | -3.51474 | 1.90033  | -1.23008 |
| H | -0.18628 | 0.06568  | -1.81204 |
| H | -0.95451 | -1.22280 | -2.77453 |
| H | -1.52807 | 0.43943  | -2.91557 |
| H | -4.16163 | -1.19118 | -0.81068 |
| H | -3.92155 | -0.16309 | -2.23962 |
| H | -3.38970 | -1.85265 | -2.25855 |
| H | -0.41149 | -0.72636 | 2.84729  |
| H | -0.23442 | -2.37698 | 2.26021  |
| H | 1.80434  | -2.92525 | 0.71296  |
| H | 3.97828  | 1.01753  | -1.36691 |
| H | 3.09600  | 3.30428  | -1.02852 |
| H | 1.12392  | 3.69781  | 0.39344  |
| H | -0.03874 | 1.83255  | 1.50379  |

|   |         |          |          |
|---|---------|----------|----------|
| H | 3.77210 | -1.58804 | -1.91784 |
| H | 3.77956 | -2.88408 | -0.71080 |
| H | 4.76946 | -1.43672 | -0.45738 |

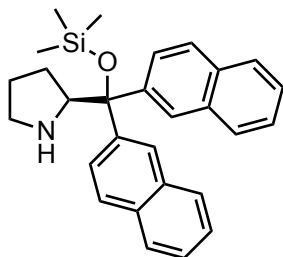

### Amine 19

#### M06-2X/def2-TZVP Geometry

|    |          |          |          |
|----|----------|----------|----------|
| C  | 0.88593  | 3.06561  | 2.71160  |
| N  | 1.12003  | 2.16842  | 1.58391  |
| C  | 0.01290  | 1.22198  | 1.58516  |
| C  | -1.20140 | 2.10971  | 1.90186  |
| C  | -0.62099 | 3.33852  | 2.63391  |
| C  | -0.11318 | 0.48292  | 0.23821  |
| C  | 1.08842  | -0.41202 | -0.07616 |
| C  | -1.35987 | -0.40184 | 0.30052  |
| O  | -0.28766 | 1.40600  | -0.80248 |
| Si | 0.62220  | 2.61892  | -1.48090 |
| C  | 0.21495  | 4.28798  | -0.74583 |
| C  | 2.46526  | 2.31558  | -1.47440 |
| C  | 0.03100  | 2.61094  | -3.25633 |
| C  | -1.38760 | -1.50200 | 1.19608  |
| C  | -2.49694 | -2.28721 | 1.30732  |
| C  | -3.64967 | -2.03113 | 0.52427  |
| C  | -3.62337 | -0.94177 | -0.38079 |
| C  | -2.45732 | -0.14035 | -0.46951 |
| C  | -4.81598 | -2.82769 | 0.61127  |
| C  | -5.90718 | -2.55330 | -0.16445 |
| C  | -5.88274 | -1.46732 | -1.06687 |
| C  | -4.76863 | -0.68276 | -1.17193 |
| C  | 2.03524  | -0.78182 | 0.83732  |
| C  | 3.11523  | -1.63297 | 0.48324  |
| C  | 3.20499  | -2.11769 | -0.84368 |
| C  | 2.19935  | -1.74194 | -1.77082 |
| C  | 1.17786  | -0.92190 | -1.39926 |
| C  | 4.10703  | -2.01054 | 1.41889  |
| C  | 5.13899  | -2.82849 | 1.05101  |
| C  | 5.22871  | -3.30973 | -0.27259 |
| C  | 4.28293  | -2.96212 | -1.19670 |

|   |          |          |          |
|---|----------|----------|----------|
| H | 1.13248  | 2.59145  | 3.67180  |
| H | 1.48954  | 3.96946  | 2.61743  |
| H | 2.02425  | 1.71549  | 1.62536  |
| H | 0.11427  | 0.46977  | 2.38123  |
| H | -1.68495 | 2.40665  | 0.97184  |
| H | -1.93518 | 1.56850  | 2.49645  |
| H | -1.05110 | 3.47731  | 3.62427  |
| H | -0.81168 | 4.24508  | 2.06154  |
| H | 0.50383  | 5.08094  | -1.44008 |
| H | -0.85961 | 4.37919  | -0.56953 |
| H | 0.73451  | 4.44619  | 0.19838  |
| H | 2.94211  | 3.10219  | -2.06599 |
| H | 2.72062  | 1.35665  | -1.92807 |
| H | 2.88825  | 2.34728  | -0.47175 |
| H | -1.04845 | 2.76766  | -3.30822 |
| H | 0.51278  | 3.40085  | -3.83636 |
| H | 0.25439  | 1.65637  | -3.73725 |
| H | -0.50668 | -1.73050 | 1.78418  |
| H | -2.50677 | -3.12692 | 1.99214  |
| H | -2.43913 | 0.69281  | -1.15992 |
| H | -4.82795 | -3.66033 | 1.30471  |
| H | -6.79518 | -3.16760 | -0.09097 |
| H | -6.75266 | -1.25974 | -1.67645 |
| H | -4.74473 | 0.15109  | -1.86339 |
| H | 1.98492  | -0.44275 | 1.86606  |
| H | 2.25562  | -2.12316 | -2.78366 |
| H | 0.41080  | -0.64059 | -2.11048 |
| H | 4.03505  | -1.63979 | 2.43476  |
| H | 5.89235  | -3.11103 | 1.77482  |
| H | 6.05004  | -3.95668 | -0.55183 |
| H | 4.34507  | -3.32956 | -2.21411 |

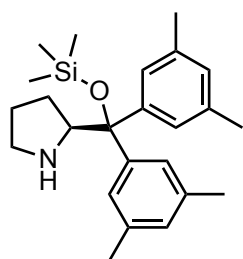

### Amine 20

M06-2X/def2-TZVP Geometry

|   |          |          |         |
|---|----------|----------|---------|
| C | -1.30987 | -2.28518 | 2.96364 |
| N | -1.38671 | -1.33148 | 1.86105 |
| C | -0.01415 | -0.93537 | 1.57602 |

|    |          |          |          |
|----|----------|----------|----------|
| C  | 0.75771  | -2.26021 | 1.67688  |
| C  | -0.10504 | -3.15797 | 2.58952  |
| C  | 0.11432  | -0.25795 | 0.19720  |
| C  | -0.67025 | 1.05550  | 0.10094  |
| C  | 1.59830  | 0.03907  | -0.04016 |
| O  | -0.31929 | -1.13598 | -0.80829 |
| Si | -1.75385 | -1.85720 | -1.22307 |
| C  | -3.27604 | -0.82517 | -0.89303 |
| C  | -1.57683 | -2.06581 | -3.07488 |
| C  | -1.92882 | -3.56126 | -0.47426 |
| C  | 2.32016  | -0.65833 | -0.99255 |
| C  | 3.68348  | -0.41658 | -1.17744 |
| C  | 4.30750  | 0.53432  | -0.38685 |
| C  | 3.60021  | 1.25465  | 0.57739  |
| C  | 2.24786  | 0.99951  | 0.73714  |
| C  | -1.12089 | 1.76545  | 1.20246  |
| C  | -1.81460 | 2.97034  | 1.05379  |
| C  | -2.04152 | 3.45411  | -0.22305 |
| C  | -1.58309 | 2.76948  | -1.35092 |
| C  | -0.89776 | 1.58047  | -1.17218 |
| C  | -2.29815 | 3.71331  | 2.26935  |
| C  | -1.85203 | 3.31234  | -2.72734 |
| C  | 4.44519  | -1.18365 | -2.22372 |
| C  | 4.30245  | 2.29038  | 1.41233  |
| H  | -1.12692 | -1.78655 | 3.92577  |
| H  | -2.23786 | -2.85247 | 3.04964  |
| H  | -1.98364 | -0.54063 | 2.06919  |
| H  | 0.38115  | -0.24337 | 2.33361  |
| H  | 0.85645  | -2.69847 | 0.68441  |
| H  | 1.76090  | -2.09714 | 2.06651  |
| H  | 0.43209  | -3.49286 | 3.47531  |
| H  | -0.43372 | -4.04417 | 2.04880  |
| H  | -3.26482 | 0.09932  | -1.47230 |
| H  | -4.15626 | -1.40091 | -1.19255 |
| H  | -3.38391 | -0.56702 | 0.15937  |
| H  | -1.46884 | -1.09742 | -3.56792 |
| H  | -0.69644 | -2.66475 | -3.31711 |
| H  | -2.44976 | -2.56513 | -3.50079 |
| H  | -2.26859 | -3.51165 | 0.55943  |
| H  | -2.65028 | -4.14584 | -1.05070 |
| H  | -0.97567 | -4.09495 | -0.50096 |
| H  | 1.81467  | -1.39733 | -1.60061 |
| H  | 5.36642  | 0.73002  | -0.52266 |
| H  | 1.68452  | 1.57208  | 1.46614  |
| H  | -0.93468 | 1.40431  | 2.20813  |
| H  | -2.58036 | 4.38727  | -0.35131 |

|   |          |          |          |
|---|----------|----------|----------|
| H | -0.52916 | 1.03484  | -2.03367 |
| H | -2.79912 | 4.63949  | 1.99184  |
| H | -3.00158 | 3.10767  | 2.84376  |
| H | -1.46653 | 3.96232  | 2.93093  |
| H | -1.59514 | 4.37064  | -2.78893 |
| H | -1.27800 | 2.77560  | -3.48122 |
| H | -2.91068 | 3.21808  | -2.97905 |
| H | 5.49752  | -0.90281 | -2.23290 |
| H | 4.38064  | -2.25792 | -2.04283 |
| H | 4.03447  | -0.99663 | -3.21751 |
| H | 5.11093  | 1.84122  | 1.99204  |
| H | 4.74458  | 3.06414  | 0.78230  |
| H | 3.61405  | 2.77117  | 2.10599  |

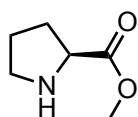

### Amine 21

M06-2X/def2-TZVP Geometry

|   |          |          |          |
|---|----------|----------|----------|
| N | 1.38127  | -0.94454 | 0.69704  |
| C | 0.37800  | 0.10873  | 0.74310  |
| C | 0.98671  | 1.29880  | -0.04828 |
| C | 2.40860  | 0.83254  | -0.37842 |
| C | 2.24529  | -0.67842 | -0.45329 |
| C | -0.94168 | -0.31983 | 0.13001  |
| O | -1.87408 | 0.63009  | 0.26682  |
| O | -1.14355 | -1.37231 | -0.41287 |
| C | -3.15104 | 0.32164  | -0.28926 |
| H | 0.93787  | -1.85314 | 0.63247  |
| H | 0.16415  | 0.39766  | 1.77532  |
| H | 0.42208  | 1.46541  | -0.96687 |
| H | 0.95547  | 2.22275  | 0.52417  |
| H | 2.78953  | 1.26968  | -1.29997 |
| H | 3.09064  | 1.08271  | 0.43480  |
| H | 3.18669  | -1.21878 | -0.35652 |
| H | 1.77753  | -0.95935 | -1.40718 |
| H | -3.56331 | -0.56909 | 0.18245  |
| H | -3.06476 | 0.14588  | -1.36060 |
| H | -3.77896 | 1.18505  | -0.09210 |

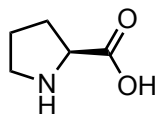

### Proline

M06-2X/def2-TZVP Geometry

|   |          |          |          |
|---|----------|----------|----------|
| N | 0.82438  | -0.94722 | 0.76825  |
| C | -0.08539 | 0.18427  | 0.69389  |
| C | 0.68199  | 1.28455  | -0.09162 |
| C | 2.06729  | 0.67132  | -0.32728 |
| C | 1.76794  | -0.82055 | -0.34263 |
| C | -1.38377 | -0.15927 | -0.00690 |
| O | -2.24351 | 0.87465  | 0.00258  |
| O | -1.64461 | -1.21445 | -0.51463 |
| H | 0.31177  | -1.82029 | 0.73169  |
| H | -0.35597 | 0.53556  | 1.69306  |
| H | 0.18677  | 1.48127  | -1.04327 |
| H | 0.71356  | 2.22249  | 0.45739  |
| H | 2.53013  | 1.02557  | -1.24683 |
| H | 2.73121  | 0.89786  | 0.50734  |
| H | 2.64818  | -1.43844 | -0.16752 |
| H | 1.32575  | -1.10671 | -1.30700 |
| H | -3.04540 | 0.58974  | -0.45896 |

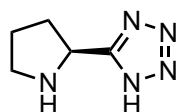

### Tetrazole-derived amine

M06-2X/def2-TZVP Geometry

|   |          |          |          |
|---|----------|----------|----------|
| N | -1.24543 | -1.04699 | -0.51683 |
| C | -0.58251 | 0.26609  | -0.63302 |
| C | -1.35269 | 1.20515  | 0.31447  |
| C | -2.75778 | 0.61117  | 0.30354  |
| C | -2.45453 | -0.88533 | 0.31366  |
| C | 0.86213  | 0.15555  | -0.27457 |
| N | 1.43310  | -0.96620 | 0.17253  |
| N | 2.72070  | -0.72411 | 0.43007  |
| N | 2.91443  | 0.50652  | 0.14612  |
| N | 1.77893  | 1.09017  | -0.29739 |
| H | -1.48932 | -1.39678 | -1.43222 |
| H | -0.64413 | 0.65123  | -1.65393 |
| H | -0.92520 | 1.14263  | 1.31730  |
| H | -1.29326 | 2.24127  | -0.01037 |



|   |          |          |          |
|---|----------|----------|----------|
| H | -3.36402 | 0.93220  | 1.14927  |
| H | -3.27861 | 0.88442  | -0.61726 |
| H | -3.26539 | -1.50151 | -0.07197 |
| H | -2.24189 | -1.21654 | 1.33324  |
| H | 1.00199  | -1.86842 | 0.29995  |

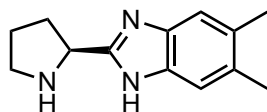

### Benzimidazole-derived amine

M06-2X/def2-TZVP Geometry

|   |          |          |          |
|---|----------|----------|----------|
| N | 3.33920  | 0.98125  | -0.62569 |
| C | 2.74917  | -0.35979 | -0.79242 |
| C | 3.43962  | -1.24915 | 0.24803  |
| C | 3.71725  | -0.24982 | 1.36832  |
| C | 4.16763  | 0.98932  | 0.59754  |
| C | 1.26398  | -0.30533 | -0.55249 |
| N | 0.61679  | 0.88900  | -0.44322 |
| C | -0.71640 | 0.60914  | -0.24605 |
| C | -0.78772 | -0.79132 | -0.25097 |
| N | 0.47162  | -1.33396 | -0.44253 |
| C | -1.84192 | 1.40489  | -0.06467 |
| C | -3.06289 | 0.77658  | 0.11215  |
| C | -3.15293 | -0.63894 | 0.10829  |
| C | -2.02179 | -1.41444 | -0.07155 |
| C | -4.49294 | -1.29604 | 0.30155  |
| C | -4.30608 | 1.60028  | 0.30948  |
| H | 3.87702  | 1.24595  | -1.43715 |
| H | 2.90748  | -0.73095 | -1.80676 |
| H | 2.81295  | -2.08862 | 0.54014  |
| H | 4.37921  | -1.62858 | -0.15913 |
| H | 2.79377  | -0.03974 | 1.91282  |
| H | 4.46413  | -0.59070 | 2.08298  |
| H | 5.23241  | 0.91135  | 0.35590  |
| H | 4.01722  | 1.91099  | 1.16040  |
| H | 1.09899  | 1.77229  | -0.47804 |
| H | -1.77625 | 2.48616  | -0.06182 |
| H | -2.08594 | -2.49559 | -0.07479 |
| H | -4.39834 | -2.38038 | 0.27663  |
| H | -4.94081 | -1.01770 | 1.25841  |
| H | -5.19950 | -1.00049 | -0.47764 |
| H | -5.04615 | 1.39691  | -0.46794 |
| H | -4.78321 | 1.37840  | 1.26686  |
| H | -4.07608 | 2.66445  | 0.28599  |

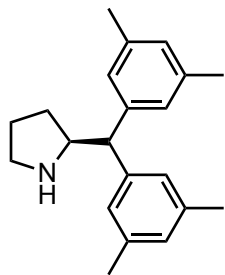

### Amine 24

M06-2X/def2-TZVP Geometry

|   |          |          |          |
|---|----------|----------|----------|
| N | 1.51164  | 2.59190  | -0.16026 |
| C | 0.23673  | 1.96747  | 0.18448  |
| C | -0.78763 | 3.05431  | -0.19336 |
| C | 0.01883  | 4.37247  | -0.21683 |
| C | 1.40014  | 3.96814  | 0.30357  |
| C | 0.06240  | 0.64133  | -0.56158 |
| C | -1.29844 | -0.00068 | -0.37510 |
| C | 1.18730  | -0.31320 | -0.19997 |
| C | 1.16047  | -1.03159 | 0.99579  |
| C | 2.21323  | -1.85745 | 1.36058  |
| C | 3.31012  | -1.96247 | 0.50442  |
| C | 3.36323  | -1.26408 | -0.69237 |
| C | 2.29077  | -0.43795 | -1.03126 |
| C | -1.76621 | -0.86152 | -1.36984 |
| C | -2.98401 | -1.51138 | -1.25463 |
| C | -3.75092 | -1.29166 | -0.10923 |
| C | -3.31629 | -0.44461 | 0.89695  |
| C | -2.08367 | 0.19594  | 0.75127  |
| C | 4.53944  | -1.39466 | -1.62111 |
| C | 2.17815  | -2.64338 | 2.64289  |
| C | -3.48482 | -2.43050 | -2.33468 |
| C | -4.14717 | -0.20368 | 2.12790  |
| H | 2.29706  | 2.09549  | 0.24387  |
| H | 0.18074  | 1.77700  | 1.26841  |
| H | -1.21660 | 2.83721  | -1.17257 |
| H | -1.61198 | 3.08489  | 0.51703  |
| H | 0.10590  | 4.74394  | -1.23700 |
| H | -0.43486 | 5.15668  | 0.38715  |
| H | 1.42247  | 4.04186  | 1.40142  |
| H | 2.20661  | 4.58267  | -0.09605 |
| H | 0.17061  | 0.88507  | -1.62251 |
| H | 0.29485  | -0.95280 | 1.64491  |
| H | 4.13764  | -2.60805 | 0.78110  |
| H | 2.32417  | 0.12998  | -1.95522 |
| H | -1.15355 | -1.02686 | -2.25034 |

|   |          |          |          |
|---|----------|----------|----------|
| H | -4.70740 | -1.79426 | -0.00703 |
| H | -1.74754 | 0.85668  | 1.54239  |
| H | 4.91548  | -0.41419 | -1.91657 |
| H | 5.35328  | -1.94684 | -1.15304 |
| H | 4.25501  | -1.92246 | -2.53361 |
| H | 2.12250  | -3.71459 | 2.43955  |
| H | 3.07940  | -2.47020 | 3.23308  |
| H | 1.31524  | -2.37076 | 3.24875  |
| H | -3.71210 | -3.41842 | -1.93086 |
| H | -4.40202 | -2.04194 | -2.78132 |
| H | -2.74637 | -2.54829 | -3.12632 |
| H | -3.58780 | -0.45159 | 3.03162  |
| H | -4.43701 | 0.84617  | 2.20218  |
| H | -5.05521 | -0.80480 | 2.11548  |

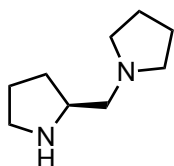

### Amine 25

#### M06-2X/def2-TZVP Geometry

|   |          |          |          |
|---|----------|----------|----------|
| N | 1.53463  | 1.06523  | -0.34587 |
| C | 1.22098  | -0.35655 | -0.53443 |
| C | 2.54032  | -1.09908 | -0.22738 |
| C | 3.56307  | 0.01527  | 0.03193  |
| C | 2.68621  | 1.14837  | 0.54741  |
| C | 0.08992  | -0.82953 | 0.37531  |
| N | -1.11546 | -0.04312 | 0.21483  |
| C | -2.16612 | -0.40024 | 1.15705  |
| C | -3.39024 | 0.34960  | 0.63366  |
| C | -3.14169 | 0.44933  | -0.89004 |
| C | -1.74957 | -0.16276 | -1.09322 |
| H | 0.72055  | 1.55789  | 0.00389  |
| H | 0.92386  | -0.52123 | -1.57361 |
| H | 2.41873  | -1.71284 | 0.66873  |
| H | 2.83950  | -1.76299 | -1.03650 |
| H | 4.34320  | -0.27841 | 0.73288  |
| H | 4.03428  | 0.32362  | -0.90205 |
| H | 3.16152  | 2.12704  | 0.47451  |
| H | 2.43314  | 0.97086  | 1.60374  |
| H | -0.10521 | -1.90189 | 0.18582  |
| H | 0.41488  | -0.73697 | 1.41711  |
| H | -2.34810 | -1.48934 | 1.13926  |

|   |          |          |          |
|---|----------|----------|----------|
| H | -1.88358 | -0.12353 | 2.17357  |
| H | -4.31745 | -0.16656 | 0.87687  |
| H | -3.43678 | 1.34346  | 1.07649  |
| H | -3.89448 | -0.08289 | -1.46926 |
| H | -3.15404 | 1.48874  | -1.21368 |
| H | -1.83384 | -1.22499 | -1.38254 |
| H | -1.16773 | 0.34873  | -1.85961 |

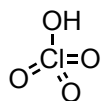

**Perchloric acid (HClO<sub>4</sub>)**

M06-2X/def2-TZVP Geometry

|    |          |          |          |
|----|----------|----------|----------|
| O  | -0.70524 | 1.26429  | 0.00000  |
| Cl | -0.13385 | -0.01284 | 0.00000  |
| O  | -0.34439 | -0.75644 | 1.17712  |
| O  | -0.34442 | -0.75645 | -1.17710 |
| O  | 1.43939  | 0.33965  | -0.00002 |
| H  | 1.91287  | -0.51007 | -0.00003 |

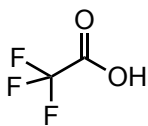

**TFA**

M06-2X/def2-TZVP Geometry

|   |          |          |          |
|---|----------|----------|----------|
| O | -1.41415 | -1.29587 | 0.00000  |
| C | -0.29259 | -0.90409 | 0.00000  |
| C | 0.08632  | 0.59288  | 0.00000  |
| O | 0.80808  | -1.64844 | 0.00000  |
| F | 0.80808  | 0.88535  | 1.07872  |
| F | 0.80808  | 0.88535  | -1.07872 |
| F | -1.00056 | 1.34074  | 0.00000  |
| H | 0.54588  | -2.58126 | 0.00000  |

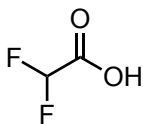

**DFA**

M06-2X/def2-TZVP Geometry

|   |          |          |          |
|---|----------|----------|----------|
| C | 0.70274  | -0.15121 | 0.35616  |
| C | -0.75686 | 0.18186  | 0.02638  |
| O | -1.52125 | -0.89312 | 0.23478  |
| O | -1.14301 | 1.24561  | -0.34032 |

|   |          |          |          |
|---|----------|----------|----------|
| F | 1.12175  | -1.13613 | -0.46799 |
| F | 1.46264  | 0.92997  | 0.15097  |
| H | 0.81440  | -0.48745 | 1.38953  |
| H | -2.43513 | -0.66093 | 0.01274  |

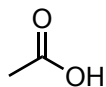

**AcOH**

M06-2X/def2-TZVP Geometry

|   |          |          |          |
|---|----------|----------|----------|
| O | -0.62367 | 1.19822  | 0.00001  |
| C | -0.08987 | 0.12601  | -0.00001 |
| C | 1.38834  | -0.12349 | -0.00001 |
| O | -0.78808 | -1.02736 | 0.00002  |
| H | 1.65728  | -0.70731 | 0.87972  |
| H | 1.65739  | -0.70883 | -0.87874 |
| H | 1.91523  | 0.82481  | -0.00084 |
| H | -1.72669 | -0.79065 | -0.00019 |

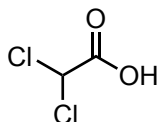

**DCA**

M06-2X/def2-TZVP Geometry

|    |          |          |          |
|----|----------|----------|----------|
| C  | -0.24823 | 0.00000  | -0.53163 |
| C  | 1.21393  | 0.00003  | -0.11002 |
| O  | 1.36850  | 0.00001  | 1.21106  |
| O  | 2.10444  | 0.00003  | -0.90611 |
| Cl | -1.04730 | -1.46503 | 0.04779  |
| Cl | -1.04735 | 1.46500  | 0.04779  |
| H  | -0.28678 | 0.00000  | -1.61423 |
| H  | 2.31821  | 0.00002  | 1.39958  |

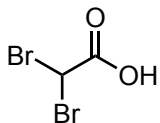

**DBA**

M06-2X/def2-TZVP Geometry

|    |          |          |          |
|----|----------|----------|----------|
| C  | 0.00000  | 0.19660  | -0.56864 |
| C  | -0.00008 | 1.64054  | -0.10717 |
| O  | -0.00014 | 1.76607  | 1.21822  |
| O  | -0.00019 | 2.55231  | -0.87985 |
| Br | 1.60944  | -0.69226 | 0.02245  |
| Br | -1.60935 | -0.69242 | 0.02244  |

|   |          |         |          |
|---|----------|---------|----------|
| H | 0.00000  | 0.18263 | -1.65022 |
| H | -0.00024 | 2.71134 | 1.42677  |

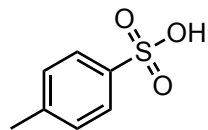

**p-TSA**

M06-2X/def2-TZVP Geometry

|   |          |          |          |
|---|----------|----------|----------|
| C | -0.13049 | 0.00685  | -0.07479 |
| C | 0.54894  | 1.21357  | -0.07805 |
| C | 1.93568  | 1.20431  | -0.02925 |
| C | 2.64326  | 0.00777  | 0.02156  |
| C | 1.93110  | -1.19320 | 0.01845  |
| C | 0.54988  | -1.20396 | -0.03298 |
| C | 4.14505  | -0.00579 | 0.05633  |
| S | -1.88851 | -0.00094 | -0.12495 |
| O | -2.34564 | 1.30393  | -0.48373 |
| O | -2.32505 | -1.16771 | -0.80672 |
| O | -2.28600 | -0.23150 | 1.39991  |
| H | -0.00395 | 2.14172  | -0.13491 |
| H | 2.47527  | 2.14323  | -0.03680 |
| H | 2.47171  | -2.13157 | 0.05088  |
| H | -0.00412 | -2.13315 | -0.05193 |
| H | 4.54566  | -0.39156 | -0.88301 |
| H | 4.54718  | 0.99406  | 0.20988  |
| H | 4.50961  | -0.65102 | 0.85630  |
| H | -2.41223 | 0.62822  | 1.82550  |

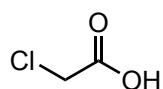

**MCA**

M06-2X/def2-TZVP Geometry

|    |          |          |          |
|----|----------|----------|----------|
| O  | 0.92500  | 1.31793  | -0.00002 |
| C  | 0.93720  | 0.12713  | -0.00001 |
| C  | -0.25912 | -0.79916 | 0.00004  |
| O  | 2.06258  | -0.61133 | 0.00002  |
| Cl | -1.78605 | 0.07336  | -0.00002 |
| H  | -0.20927 | -1.43459 | 0.88198  |
| H  | -0.20926 | -1.43470 | -0.88183 |
| H  | 2.81213  | 0.00153  | 0.00003  |

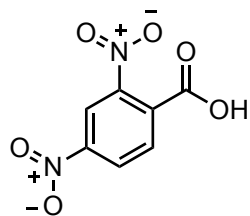

**DNBA**

M06-2X/def2-TZVP Geometry

|   |          |          |          |
|---|----------|----------|----------|
| C | 0.93127  | -0.74727 | 0.00790  |
| C | 0.43050  | 0.54800  | 0.03175  |
| C | -0.92112 | 0.81911  | 0.01397  |
| C | -1.77968 | -0.26247 | -0.00555 |
| C | -1.33465 | -1.57027 | -0.00435 |
| C | 0.03140  | -1.80473 | 0.00112  |
| C | 2.39270  | -1.08565 | -0.06046 |
| O | 3.00265  | -0.44156 | -1.05870 |
| O | 2.90989  | -1.90080 | 0.64204  |
| H | -1.29052 | 1.83397  | 0.02840  |
| H | -2.05059 | -2.37898 | -0.01101 |
| H | 0.41675  | -2.81523 | -0.00437 |
| H | 3.94258  | -0.67641 | -1.03792 |
| N | 1.34630  | 1.69830  | 0.16423  |
| O | 2.36046  | 1.51358  | 0.79321  |
| O | 0.99693  | 2.73996  | -0.33326 |
| N | -3.23622 | -0.00244 | -0.01386 |
| O | -3.59040 | 1.15090  | 0.00823  |
| O | -3.96592 | -0.96393 | -0.04325 |

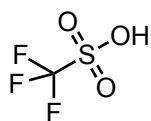

**Triflic acid**

M06-2X/def2-TZVP Geometry

|   |          |          |          |
|---|----------|----------|----------|
| C | -0.98337 | 0.00290  | -0.00187 |
| S | 0.84979  | -0.13632 | 0.07305  |
| O | 1.23316  | 1.05116  | -0.88374 |
| F | -1.51353 | -0.89970 | 0.80024  |
| F | -1.34569 | 1.21499  | 0.39678  |
| F | -1.40710 | -0.19356 | -1.23494 |
| O | 1.23124  | 0.19018  | 1.40038  |
| O | 1.20289  | -1.34081 | -0.57241 |
| H | 1.36204  | 1.86379  | -0.37015 |

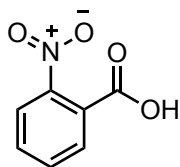

**2-NO<sub>2</sub>-benzoic acid**

M06-2X/def2-TZVP Geometry

|   |          |          |          |
|---|----------|----------|----------|
| C | 1.07960  | -1.68228 | 0.00778  |
| C | 0.07182  | -0.72820 | -0.00573 |
| C | 0.44007  | 0.61029  | -0.02139 |
| C | 1.76013  | 1.01337  | 0.00985  |
| C | 2.75355  | 0.04583  | 0.03616  |
| C | 2.41309  | -1.29869 | 0.02715  |
| N | -0.58394 | 1.66078  | -0.16993 |
| O | -1.55437 | 1.38944  | -0.83678 |
| O | -0.36246 | 2.72808  | 0.35125  |
| C | -1.34203 | -1.21716 | 0.06038  |
| O | -2.04268 | -0.59855 | 1.01796  |
| O | -1.76424 | -2.11661 | -0.60479 |
| H | 0.80019  | -2.72744 | 0.01096  |
| H | 1.98977  | 2.06921  | -0.00374 |
| H | 3.79239  | 0.34598  | 0.05135  |
| H | 3.18743  | -2.05385 | 0.03888  |
| H | -2.94952 | -0.93716 | 0.98571  |

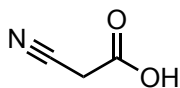

**CNAcOH**

M06-2X/def2-TZVP Geometry

|   |          |          |          |
|---|----------|----------|----------|
| O | 0.75659  | 1.33040  | -0.00002 |
| C | 0.85689  | 0.14385  | 0.00000  |
| C | -0.28747 | -0.85173 | 0.00001  |
| O | 2.02515  | -0.51647 | -0.00004 |
| C | -1.59504 | -0.20986 | 0.00003  |
| N | -2.63682 | 0.26310  | 0.00004  |
| H | -0.18870 | -1.49466 | -0.87626 |
| H | -0.18868 | -1.49466 | 0.87628  |
| H | 2.73488  | 0.14259  | -0.00007 |



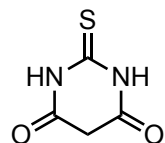

**TBA**

M06-2X/def2-TZVP Geometry

|   |          |          |          |
|---|----------|----------|----------|
| C | -1.03513 | 0.00000  | -0.00017 |
| N | -0.29922 | 1.15658  | -0.00015 |
| C | 1.08071  | 1.28578  | -0.00005 |
| C | 1.86565  | -0.00000 | 0.00042  |
| C | 1.08071  | -1.28578 | 0.00001  |
| N | -0.29922 | -1.15658 | -0.00015 |
| O | 1.59890  | -2.36829 | -0.00014 |
| O | 1.59890  | 2.36828  | -0.00008 |
| S | -2.67052 | 0.00000  | 0.00007  |
| H | -0.83052 | 2.01761  | -0.00016 |
| H | 2.52271  | -0.00002 | -0.87077 |
| H | 2.52153  | 0.00001  | 0.87253  |
| H | -0.83053 | -2.01761 | -0.00018 |

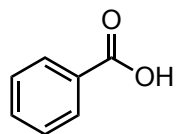

**Benzoic acid**

M06-2X/def2-TZVP Geometry

|   |          |          |          |
|---|----------|----------|----------|
| C | 2.55389  | -0.04503 | 0.00001  |
| C | 1.82975  | -1.22978 | 0.00007  |
| C | 0.44369  | -1.19577 | 0.00006  |
| C | -0.21408 | 0.03000  | 0.00002  |
| C | 0.51127  | 1.21728  | -0.00009 |
| C | 1.89544  | 1.17851  | -0.00007 |
| C | -1.69747 | 0.12282  | 0.00001  |
| O | -2.30162 | -1.08048 | -0.00021 |
| O | -2.31916 | 1.15004  | 0.00017  |
| H | 2.34614  | -2.18063 | 0.00013  |
| H | -0.13091 | -2.11154 | 0.00014  |
| H | -0.02816 | 2.15528  | -0.00011 |
| H | 2.46261  | 2.09994  | -0.00014 |
| H | -3.25439 | -0.91286 | 0.00023  |
| H | 3.63602  | -0.07498 | 0.00005  |

H-Cl  
**HCl**

M06-2X/def2-TZVP Geometry

|    |         |         |          |
|----|---------|---------|----------|
| H  | 0.00000 | 0.00000 | -1.20633 |
| Cl | 0.00000 | 0.00000 | 0.07096  |

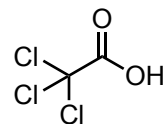

**TCA**

M06-2X/def2-TZVP Geometry

|    |          |          |          |
|----|----------|----------|----------|
| O  | -2.01428 | 1.00308  | 0.00000  |
| C  | -1.33409 | 0.02846  | 0.00000  |
| C  | 0.21326  | 0.05480  | 0.00000  |
| O  | -1.78005 | -1.22523 | 0.00000  |
| Cl | 0.78093  | -0.78304 | 1.45229  |
| Cl | 0.78093  | -0.78304 | -1.45229 |
| Cl | 0.78093  | 1.71148  | 0.00000  |
| H  | -2.74775 | -1.19420 | 0.00000  |

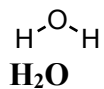

**H<sub>2</sub>O**

M06-2X/def2-TZVP Geometry

|   |          |          |          |
|---|----------|----------|----------|
| O | 0.00000  | 0.00000  | 0.11617  |
| H | -0.00000 | 0.76445  | -0.46468 |
| H | -0.00000 | -0.76445 | -0.46468 |

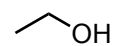

**EtOH**

M06-2X/def2-TZVP Geometry

|   |          |          |          |
|---|----------|----------|----------|
| O | -1.14330 | -0.39501 | 0.00000  |
| H | -1.98167 | 0.07320  | -0.00000 |
| C | -0.08438 | 0.54799  | 0.00000  |
| C | 1.21630  | -0.22171 | -0.00000 |
| H | -0.14157 | 1.19092  | 0.88547  |
| H | -0.14157 | 1.19092  | -0.88547 |
| H | 2.06641  | 0.46088  | 0.00000  |
| H | 1.27662  | -0.85677 | 0.88366  |
| H | 1.27662  | -0.85677 | -0.88367 |

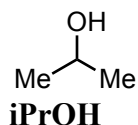

M06-2X/def2-TZVP Geometry

|   |          |          |          |
|---|----------|----------|----------|
| O | 0.06692  | 1.36071  | -0.16145 |
| H | 0.91547  | 1.74544  | 0.07572  |
| C | -0.00220 | 0.04238  | 0.36728  |
| C | -1.32693 | -0.53172 | -0.09023 |
| C | 1.17698  | -0.79347 | -0.10239 |
| H | 0.00584  | 0.09015  | 1.46386  |
| H | -1.34945 | -0.58129 | -1.18012 |
| H | -1.47067 | -1.53539 | 0.31058  |
| H | -2.14841 | 0.10164  | 0.24256  |
| H | 1.18096  | -0.84766 | -1.19239 |
| H | 1.12098  | -1.80635 | 0.29901  |
| H | 2.12276  | -0.35537 | 0.22445  |

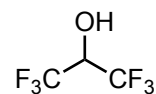

**HFIP**

M06-2X/def2-TZVP Geometry

|   |          |          |          |
|---|----------|----------|----------|
| O | 0.00003  | 1.86948  | -0.18643 |
| H | 0.00013  | 1.94691  | 0.77640  |
| C | -0.00001 | 0.52632  | -0.54117 |
| C | 1.27978  | -0.15170 | -0.04328 |
| C | -1.27979 | -0.15168 | -0.04327 |
| H | -0.00002 | 0.46235  | -1.63035 |
| F | 1.39030  | -0.04147 | 1.28475  |
| F | 1.32777  | -1.44163 | -0.35868 |
| F | 2.33750  | 0.44405  | -0.58652 |
| F | -1.39010 | -0.04184 | 1.28480  |
| F | -1.32797 | -1.44152 | -0.35906 |
| F | -2.33752 | 0.44434  | -0.58620 |

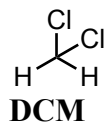

M06-2X/def2-TZVP Geometry

|   |          |          |         |
|---|----------|----------|---------|
| C | -0.00000 | 0.00000  | 0.76575 |
| H | 0.89613  | -0.00000 | 1.37429 |

|    |          |          |          |
|----|----------|----------|----------|
| H  | -0.89613 | 0.00000  | 1.37429  |
| Cl | 0.00000  | 1.46772  | -0.21597 |
| Cl | -0.00000 | -1.46772 | -0.21597 |

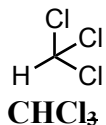

M06-2X/def2-TZVP Geometry

|    |          |          |          |
|----|----------|----------|----------|
| C  | -0.00009 | 0.00015  | 0.45722  |
| H  | 0.00006  | 0.00009  | 1.53940  |
| Cl | -1.12375 | 1.24399  | -0.08399 |
| Cl | 1.63930  | 0.35112  | -0.08397 |
| Cl | -0.51552 | -1.59517 | -0.08396 |

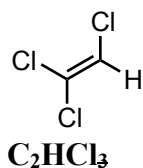

M06-2X/def2-TZVP Geometry

|    |          |          |          |
|----|----------|----------|----------|
| C  | -0.42519 | -0.11077 | 0.00000  |
| Cl | -0.33570 | 1.59396  | -0.00000 |
| Cl | -2.01159 | -0.77273 | 0.00000  |
| C  | 0.63235  | -0.90953 | -0.00000 |
| H  | 0.51349  | -1.98212 | 0.00000  |
| Cl | 2.24397  | -0.34452 | 0.00000  |

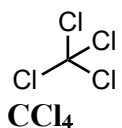

M06-2X/def2-TZVP Geometry

|    |          |          |          |
|----|----------|----------|----------|
| C  | 0.00000  | 0.00000  | 0.00000  |
| Cl | 1.01872  | 1.01872  | 1.01872  |
| Cl | -1.01872 | -1.01872 | 1.01872  |
| Cl | -1.01872 | 1.01872  | -1.01872 |
| Cl | 1.01872  | -1.01872 | -1.01872 |

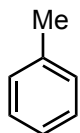

**toluene**

M06-2X/def2-TZVP Geometry

|   |          |          |          |
|---|----------|----------|----------|
| C | -0.90762 | 0.00281  | -0.01098 |
| C | -0.19558 | -1.19438 | -0.00835 |
| C | 1.19136  | -1.19990 | 0.00192  |
| C | 1.89319  | -0.00201 | 0.00793  |
| C | 1.19600  | 1.19728  | 0.00187  |
| C | -0.19219 | 1.19656  | -0.00826 |
| C | -2.41157 | 0.00099  | 0.00872  |
| H | -0.73718 | -2.13343 | -0.01687 |
| H | 1.72574  | -2.14139 | 0.00176  |
| H | 2.97533  | -0.00402 | 0.01315  |
| H | 1.73327  | 2.13711  | 0.00162  |
| H | -0.73010 | 2.13751  | -0.01671 |
| H | -2.81234 | 0.93651  | -0.38003 |
| H | -2.81213 | -0.81852 | -0.58808 |
| H | -2.78412 | -0.12190 | 1.02810  |

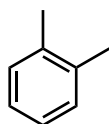

**xylene**

M06-2X/def2-TZVP Geometry

|   |          |          |          |
|---|----------|----------|----------|
| C | -0.47170 | 0.70101  | 0.00000  |
| C | 0.74274  | 1.37742  | 0.00001  |
| C | 1.95033  | 0.69258  | 0.00000  |
| C | 1.95033  | -0.69258 | -0.00000 |
| C | 0.74274  | -1.37742 | -0.00000 |
| C | -0.47170 | -0.70101 | -0.00000 |
| C | -1.76926 | 1.45967  | -0.00001 |
| H | 0.74071  | 2.46130  | 0.00001  |
| H | 2.88377  | 1.24034  | 0.00000  |
| H | 2.88376  | -1.24034 | -0.00001 |
| H | 0.74070  | -2.46130 | -0.00001 |
| C | -1.76926 | -1.45967 | 0.00001  |
| H | -2.37182 | 1.21405  | -0.87749 |
| H | -2.37193 | 1.21388  | 0.87735  |
| H | -1.59336 | 2.53409  | 0.00011  |
| H | -1.59337 | -2.53409 | -0.00009 |
| H | -2.37183 | -1.21404 | 0.87748  |

H -2.37192 -1.21389 -0.87736

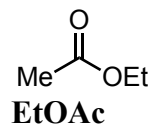

M06-2X/def2-TZVP Geometry

|   |          |          |          |
|---|----------|----------|----------|
| C | -2.13106 | -0.87753 | 0.00003  |
| C | -1.03007 | 0.14410  | -0.00007 |
| O | 0.17708  | -0.44128 | 0.00010  |
| O | -1.18428 | 1.33394  | -0.00029 |
| C | 1.30109  | 0.44839  | -0.00003 |
| C | 2.55058  | -0.39780 | 0.00021  |
| H | -2.03789 | -1.51423 | 0.87921  |
| H | -3.09163 | -0.37264 | 0.00025  |
| H | -2.03821 | -1.51399 | -0.87936 |
| H | 1.24014  | 1.09004  | 0.88003  |
| H | 1.24023  | 1.08967  | -0.88035 |
| H | 3.43166  | 0.24377  | 0.00012  |
| H | 2.58496  | -1.03325 | 0.88467  |
| H | 2.58505  | -1.03362 | -0.88398 |

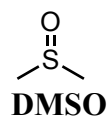

M06-2X/def2-TZVP Geometry

|   |          |          |          |
|---|----------|----------|----------|
| S | 0.00000  | 0.23087  | -0.44340 |
| O | -0.00000 | 1.46198  | 0.38610  |
| C | -1.34113 | -0.79424 | 0.18279  |
| H | -1.32228 | -1.77017 | -0.30061 |
| H | -1.23271 | -0.88318 | 1.26309  |
| H | -2.26726 | -0.27610 | -0.05639 |
| C | 1.34113  | -0.79424 | 0.18279  |
| H | 1.32228  | -1.77017 | -0.30061 |
| H | 2.26726  | -0.27610 | -0.05639 |
| H | 1.23271  | -0.88318 | 1.26309  |

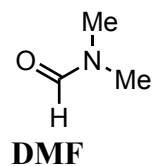

M06-2X/def2-TZVP Geometry

|   |          |          |          |
|---|----------|----------|----------|
| C | -0.86237 | -0.64342 | -0.00016 |
| O | -1.93862 | -0.09229 | 0.00032  |
| H | -0.76297 | -1.74213 | -0.00035 |
| N | 0.34102  | -0.02202 | -0.00089 |
| C | 1.58146  | -0.75670 | 0.00030  |
| H | 2.17562  | -0.51659 | -0.88527 |
| H | 2.17429  | -0.51617 | 0.88668  |
| H | 1.37500  | -1.82587 | 0.00043  |
| C | 0.42113  | 1.42116  | 0.00006  |
| H | 0.95501  | 1.77322  | -0.88599 |
| H | -0.58895 | 1.82144  | -0.00111 |
| H | 0.95246  | 1.77231  | 0.88805  |

Me-CN

**MeCN**

M06-2X/def2-TZVP Geometry

|   |          |          |          |
|---|----------|----------|----------|
| C | 0.00000  | 0.00000  | 0.28210  |
| N | 0.00000  | 0.00000  | 1.42741  |
| C | -0.00000 | -0.00000 | -1.17532 |
| H | -0.00000 | 1.02399  | -1.54420 |
| H | 0.88680  | -0.51199 | -1.54420 |
| H | -0.88680 | -0.51199 | -1.54420 |

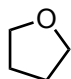

**THF**

M06-2X/def2-TZVP Geometry

|   |          |          |          |
|---|----------|----------|----------|
| C | 1.12421  | -0.46915 | -0.15948 |
| O | 0.00014  | -1.19182 | 0.30110  |
| C | -1.12404 | -0.46944 | -0.15967 |
| C | -0.77290 | 1.01009  | 0.05056  |
| C | 0.77258  | 1.01036  | 0.05031  |
| H | 1.99539  | -0.80134 | 0.40183  |
| H | 1.28858  | -0.67940 | -1.22436 |
| H | -1.28801 | -0.67950 | -1.22465 |
| H | -1.99527 | -0.80203 | 0.40132  |
| H | -1.19341 | 1.63953  | -0.73195 |
| H | -1.15759 | 1.36284  | 1.00593  |
| H | 1.19258  | 1.63961  | -0.73262 |
| H | 1.15748  | 1.36368  | 1.00539  |

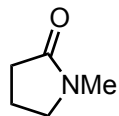

**NMP**

M06-2X/def2-TZVP Geometry

|   |          |          |          |
|---|----------|----------|----------|
| C | 0.17981  | 0.86595  | -0.00687 |
| C | -1.33430 | 0.90004  | 0.13653  |
| C | -1.77660 | -0.52597 | -0.19136 |
| C | -0.53749 | -1.37312 | 0.13117  |
| H | -1.55428 | 1.17341  | 1.17115  |
| H | -1.75845 | 1.66721  | -0.50659 |
| H | -2.65199 | -0.85028 | 0.36673  |
| H | -2.00259 | -0.60924 | -1.25435 |
| H | -0.55349 | -1.74593 | 1.16281  |
| H | -0.43167 | -2.23330 | -0.53263 |
| C | 1.93206  | -0.86002 | -0.01136 |
| H | 2.14461  | -1.57561 | -0.80798 |
| H | 2.55447  | 0.02287  | -0.14032 |
| H | 2.16704  | -1.32778 | 0.94932  |
| N | 0.55564  | -0.44309 | -0.05948 |
| O | 0.92700  | 1.81737  | -0.04255 |

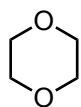

**Dioxane**

M06-2X/def2-TZVP Geometry

|   |          |          |          |
|---|----------|----------|----------|
| O | -0.00000 | -1.37218 | -0.29407 |
| C | 1.16264  | -0.73284 | 0.19398  |
| C | 1.16264  | 0.73284  | -0.19398 |
| O | 0.00000  | 1.37218  | 0.29407  |
| C | -1.16264 | 0.73284  | -0.19398 |
| C | -1.16264 | -0.73284 | 0.19398  |
| H | 1.20364  | -0.82176 | 1.28773  |
| H | 2.01883  | -1.25131 | -0.23740 |
| H | 2.01883  | 1.25131  | 0.23740  |
| H | 1.20364  | 0.82176  | -1.28773 |
| H | -2.01883 | 1.25131  | 0.23740  |
| H | -1.20364 | 0.82176  | -1.28773 |
| H | -2.01883 | -1.25131 | -0.23740 |
| H | -1.20364 | -0.82176 | 1.28773  |



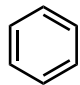

**PhH**

M06-2X/def2-TZVP Geometry

|   |          |          |          |
|---|----------|----------|----------|
| C | -0.33147 | -1.34837 | 0.00000  |
| C | 1.00207  | -0.96119 | 0.00001  |
| C | 1.33350  | 0.38712  | -0.00000 |
| C | 0.33141  | 1.34839  | 0.00000  |
| C | -1.00202 | 0.96124  | 0.00000  |
| C | -1.33348 | -0.38718 | -0.00001 |
| H | -0.58979 | -2.39948 | -0.00001 |
| H | 1.78311  | -1.71055 | -0.00001 |
| H | 2.37294  | 0.68901  | -0.00002 |
| H | 0.58986  | 2.39946  | -0.00001 |
| H | -1.78316 | 1.71050  | 0.00001  |
| H | -2.37296 | -0.68894 | 0.00000  |

Me-NO<sub>2</sub>

**CH<sub>3</sub>NO<sub>2</sub>**

M06-2X/def2-TZVP Geometry

|   |          |          |          |
|---|----------|----------|----------|
| N | 0.17425  | 0.00000  | -0.00997 |
| O | 0.72455  | 1.07490  | 0.00256  |
| O | 0.72437  | -1.07500 | 0.00256  |
| C | -1.31599 | 0.00009  | -0.00337 |
| H | -1.61473 | -0.00076 | 1.04242  |
| H | -1.65019 | 0.90576  | -0.49594 |
| H | -1.65027 | -0.90479 | -0.49734 |

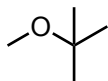

**MTBE**

M06-2X/def2-TZVP Geometry

|   |          |          |          |
|---|----------|----------|----------|
| C | -2.01626 | 0.00666  | -0.14994 |
| O | -0.77675 | 0.00853  | -0.80976 |
| C | 0.39505  | -0.00069 | 0.00773  |
| C | 0.38901  | -1.18880 | 0.96669  |
| C | 0.52631  | 1.31303  | 0.77599  |
| C | 1.53511  | -0.13750 | -0.99069 |
| H | -2.19399 | -0.92820 | 0.39059  |
| H | -2.11821 | 0.84274  | 0.54906  |
| H | -2.77868 | 0.10929  | -0.92022 |
| H | 0.19556  | -2.11230 | 0.41839  |

|   |          |          |          |
|---|----------|----------|----------|
| H | 1.35935  | -1.27382 | 1.45733  |
| H | -0.36662 | -1.07859 | 1.74558  |
| H | 0.46142  | 2.15515  | 0.08581  |
| H | -0.24938 | 1.42102  | 1.53478  |
| H | 1.49064  | 1.35303  | 1.28444  |
| H | 1.50758  | 0.69065  | -1.69929 |
| H | 2.49859  | -0.13387 | -0.48006 |
| H | 1.43249  | -1.06951 | -1.54706 |

Me-OH

### MeOH

M06-2X/def2-TZVP Geometry

|   |          |          |          |
|---|----------|----------|----------|
| C | 0.66173  | -0.02046 | 0.00000  |
| H | 1.08259  | 0.98329  | -0.00109 |
| H | 1.02057  | -0.54596 | -0.88994 |
| H | 1.02073  | -0.54413 | 0.89097  |
| O | -0.74380 | 0.12246  | 0.00000  |
| H | -1.14390 | -0.75008 | 0.00001  |

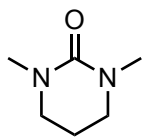

### DMPU

M06-2X/def2-TZVP Geometry

|   |          |          |          |
|---|----------|----------|----------|
| C | -1.23135 | 1.30971  | 0.19831  |
| C | -0.00004 | 2.00168  | -0.34632 |
| C | 1.23129  | 1.30980  | 0.19840  |
| C | 0.00003  | -0.83441 | -0.07803 |
| H | -1.32510 | 1.49421  | 1.27805  |
| H | 0.00002  | 1.93946  | -1.43606 |
| H | 2.13364  | 1.70597  | -0.27265 |
| H | -2.13371 | 1.70584  | -0.27277 |
| H | -0.00013 | 3.05397  | -0.06191 |
| H | 1.32494  | 1.49427  | 1.27814  |
| N | -1.17405 | -0.11183 | -0.07444 |
| N | 1.17405  | -0.11174 | -0.07443 |
| C | 2.41825  | -0.83414 | 0.08072  |
| H | 2.26028  | -1.87327 | -0.18723 |
| H | 3.17646  | -0.39779 | -0.57222 |
| H | 2.78043  | -0.78387 | 1.11364  |
| C | -2.41823 | -0.83421 | 0.08075  |
| H | -2.26011 | -1.87349 | -0.18653 |
| H | -2.78072 | -0.78335 | 1.11354  |

|   |          |          |          |
|---|----------|----------|----------|
| H | -3.17631 | -0.39829 | -0.57264 |
| O | 0.00008  | -2.05366 | -0.12279 |

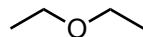

**Et<sub>2</sub>O**

M06-2X/def2-TZVP Geometry

|   |          |          |          |
|---|----------|----------|----------|
| C | -0.40929 | -2.36741 | 0.00000  |
| C | 0.51624  | -1.17268 | 0.00000  |
| O | -0.26199 | -0.00000 | 0.00000  |
| C | 0.51624  | 1.17268  | 0.00000  |
| C | -0.40929 | 2.36741  | 0.00000  |
| H | 0.16437  | -3.29439 | 0.00000  |
| H | -1.04662 | -2.35081 | 0.88369  |
| H | -1.04662 | -2.35081 | -0.88369 |
| H | 1.16756  | -1.18637 | -0.88463 |
| H | 1.16756  | -1.18637 | 0.88463  |
| H | 1.16756  | 1.18637  | -0.88463 |
| H | 1.16756  | 1.18637  | 0.88463  |
| H | 0.16437  | 3.29439  | 0.00000  |
| H | -1.04662 | 2.35081  | -0.88369 |
| H | -1.04662 | 2.35081  | 0.88369  |

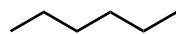

**hexane**

M06-2X/def2-TZVP Geometry

|   |          |          |          |
|---|----------|----------|----------|
| C | 0.66386  | 0.37290  | 0.00000  |
| H | 0.71110  | 1.02956  | -0.87562 |
| H | 0.71110  | 1.02956  | 0.87562  |
| C | -0.66386 | -0.37290 | -0.00000 |
| H | -0.71110 | -1.02956 | -0.87562 |
| H | -0.71110 | -1.02956 | 0.87562  |
| C | -1.87473 | 0.55169  | 0.00000  |
| H | -1.82628 | 1.20648  | 0.87503  |
| H | -1.82628 | 1.20648  | -0.87503 |
| C | 1.87473  | -0.55169 | 0.00000  |
| H | 1.82628  | -1.20648 | 0.87503  |
| H | 1.82628  | -1.20648 | -0.87503 |
| C | -3.19436 | -0.20876 | -0.00000 |
| H | -4.04915 | 0.46804  | -0.00000 |
| H | -3.27378 | -0.84870 | -0.88093 |
| H | -3.27378 | -0.84869 | 0.88093  |
| C | 3.19436  | 0.20876  | -0.00000 |
| H | 4.04915  | -0.46804 | -0.00000 |

|   |         |         |          |
|---|---------|---------|----------|
| H | 3.27378 | 0.84870 | -0.88093 |
| H | 3.27378 | 0.84869 | 0.88093  |

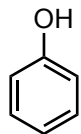

**Phenol**

M06-2X/def2-TZVP Geometry

|   |          |          |          |
|---|----------|----------|----------|
| C | -0.00000 | 0.93447  | -0.00000 |
| C | 1.21088  | 0.25175  | -0.00000 |
| C | 1.21420  | -1.13295 | 0.00000  |
| C | 0.02140  | -1.84643 | 0.00000  |
| C | -1.18142 | -1.15674 | 0.00000  |
| C | -1.19822 | 0.23112  | -0.00000 |
| H | 2.13042  | 0.82135  | -0.00000 |
| H | 2.15951  | -1.66025 | 0.00000  |
| H | 0.03099  | -2.92771 | 0.00000  |
| H | -2.11855 | -1.69832 | 0.00000  |
| H | -2.14012 | 0.76853  | -0.00000 |
| O | 0.04783  | 2.29482  | -0.00000 |
| H | -0.84586 | 2.65049  | -0.00000 |

## Parameters Collected

The parameters calculated and considered for the systems are reported in separate tables encompassed in the accompanying excel spreadsheets. Sterimol parameters L, B1 and B5, respectively, represent the length, minimum and maximum widths of the considered substituent and are calculated using the Bondi radii.<sup>12,13</sup> IR stretching frequencies, intensities and NBO charges have been found to be useful descriptors of electronic and steric properties,<sup>14</sup> hence these have been calculated. Global parameters including highest occupied molecular orbital (HOMO)/lowest unoccupied molecular orbital (LUMO) energies and polarizability were also collected for each reaction component. Solvent topological and connectivity descriptors were acquired from DFT optimized geometries and calculated with the molecular descriptors application available in Maestro using default settings.

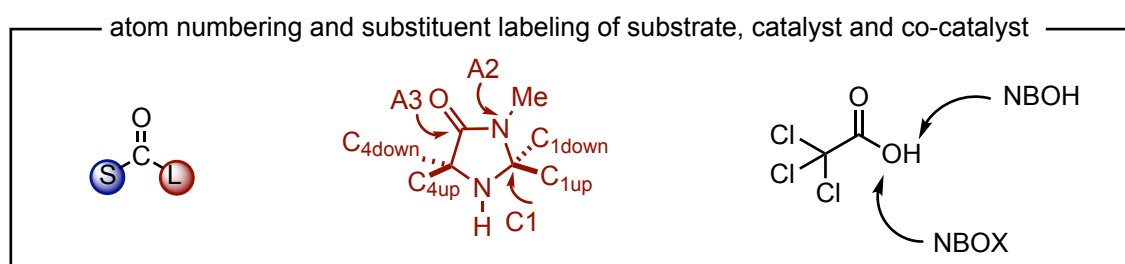

### Carbonyl that engages in iminium and enamine formation

Carbonyls have a number of overlapping features and these have been parameterized as follows. Sterimol values of the small (S) and large (L) substituents were collected. NBO charges from the common C, O, S and L unit were calculated and acquired, in addition to HOMO, LUMO and polarizabilities.

### Other reaction components

Limited structural overlap across this diverse set of reaction components necessitated us to only consider the HOMO, LUMO and polarizability as DFT descriptors.

### Secondary amine catalyst

NBO charges, Sterimol values of each substituent (C1, A2, A3 and C4), vibrations and intensities of the N-H bond, global properties such as LUMO, HOMO and polarizability were calculated and collected.

### Solvent parameter tables

2D descriptors (e.g., common topological and connectivity as exemplified by molecular shape, size and number of heteroatoms) are used to describe structurally disparate solvent molecules and have been defined elsewhere.<sup>15</sup>

### Co-catalyst parameter tables

NBO charges from the common H-X subunit (where X is O, Cl, N) are calculated and collected. LUMO, HOMO and polarizability were also collected as descriptors.

## Data curation

Relevant data were manually extracted from the following sources:

- (1) Ouellet, S. G.; Tuttle, J. B.; MacMillan, D. W. C. Enantioselective organocatalytic hydride reduction. *J. Am. Chem. Soc.* **2005**, *127*, 32–33.
- (2) Suri, J. T.; Mitsumori, S.; Albertshofer, K.; Tanaka, F.; Barbas, C. F. Dihydroxyacetone variants in the organocatalytic construction of carbohydrates: Mimicking tagatose and fucose aldolases. *J. Org. Chem.* **2006**, *71*, 3822–3828.
- (3) Notz, W.; List, B. Catalytic asymmetric synthesis of anti-1,2-diols. *J. Am. Chem. Soc.* **2000**, *122*, 7386–7387.
- (4) Paras, N. A.; MacMillan, D. W. C. The enantioselective organocatalytic 1,4-addition of electron-rich benzenes to  $\alpha,\beta$ -unsaturated aldehydes. *J. Am. Chem. Soc.* **2002**, *124*, 7894–7895.
- (5) Northrup, A. B.; MacMillan, D. W. C. The first general enantioselective catalytic Diels-Alder reaction with simple ( $\alpha,\beta$ -unsaturated ketones). *J. Am. Chem. Soc.* **2002**, *124*, 2458–2460.
- (6) Marigo, M.; Franzén, J.; Poulsen, T. B.; Zhuang, W.; Jørgensen, K. A. Asymmetric organocatalytic epoxidation of  $\alpha,\beta$ -unsaturated aldehydes with hydrogen peroxide. *J. Am. Chem. Soc.* **2005**, *127*, 6964–6965.
- (7) Austin, J. F.; MacMillan, D. W. C. Enantioselective organocatalytic indole alkylations. Design of a new and highly effective chiral amine for iminium catalysis. *J. Am. Chem. Soc.* **2002**, *124*, 1172–1173.
- (8) Brown, S. P.; Goodwin, N. C.; MacMillan, D. W. C. The first enantioselective organocatalytic Mukaiyama-Michael reaction: A direct method for the synthesis of enantioenriched  $\gamma$ -butenolide architecture. *J. Am. Chem. Soc.* **2003**, *125*, 1192–1194.
- (9) Hayashi, Y. *et al.* The direct and enantioselective, one-pot, three-component, cross-Mannich reaction of aldehydes. *Angew. Chem., Int. Ed.* **2003**, *42*, 3677–3680.
- (10) Huang, Y.; Walji, A. M.; Larsen, C. H.; MacMillan, D. W. C. Enantioselective organocascade catalysis. *J. Am. Chem. Soc.* **2005**, *127*, 15051–15053.
- (11) Lacoste, E.; Landais, Y.; Schenk, K.; Verlhac, J. B.; Vincent, J. M. Benzoimidazolepyrrolidine (BIP), a highly reactive chiral organocatalyst for aldol process. *Tetrahedron Lett.* **2004**, *45*, 8035–8038.
- (12) Marigo, M.; Fielenbach, D.; Braunton, A.; Kjærsgaard, A.; Jørgensen, K. A. Enantioselective formation of stereogenic carbon - Fluorine centers by a simple catalytic method. *Angew. Chem., Int. Ed.* **2005**, *44*, 3703–3706.
- (13) Franzén, J. *et al.* A general organocatalyst for direct  $\alpha$ -functionalization of aldehydes: Stereoselective C-C, C-N, C-F, C-Br, and C-S bond-forming reactions. Scope and mechanistic insights. *J. Am. Chem. Soc.* **2005**, *127*, 18296–18304.
- (14) Kumar, I.; Mir, N. A.; Gupta, V. K.; Rajnikant, R. An organocatalytic direct Mannich-cyclization cascade as [3+2] annulation: Asymmetric synthesis of 2,3-substituted pyrrolidines. *Chem. Commun.* **2012**, *48*, 6975–6977.
- (15) Northrup, A. B.; Mangion, I. K.; Hettche, F.; MacMillan, D. W. C. Enantioselective organocatalytic direct aldol reactions of  $\alpha$ -oxyaldehydes: Step one in a two-step synthesis of carbohydrates. *Angew. Chem., Int. Ed.* **2004**, *43*, 2152–2154.
- (16) Beeson, T. D.; MacMillan, D. W. C. Enantioselective organocatalytic  $\alpha$ -fluorination of aldehydes. *J. Am. Chem. Soc.* **2005**, *127*, 8826–8828.

- (17) Córdova, A.; Watanabe, S. I.; Tanaka, F.; Notz, W.; Barbas, C. F. A highly enantioselective route to either enantiomer of both  $\alpha$ - and  $\beta$ -amino acid derivatives. *J. Am. Chem. Soc.* **2002**, *124*, 1866–1867.
- (18) Zhuang, W.; Saaby, S.; Jørgensen, K. A. Direct organocatalytic enantioselective mannich reactions of ketimines: An approach to optically active quaternary  $\alpha$ -amino acid derivatives. *Angew. Chem., Int. Ed.* **2004**, *43*, 4476–4478.
- (19) Hayashi, Y.; Gotoh, H.; Hayashi, T.; Shoji, M. Diphenylprolinol silyl ethers as efficient organocatalysts for the asymmetric Michael reaction of aldehydes and nitroalkenes. *Angew. Chem., Int. Ed.* **2005**, *44*, 4212–4215.
- (20) Hayashi, Y.; Yamaguchi, J.; Hibino, K.; Shoji, M. Direct proline catalyzed asymmetric  $\alpha$ -aminooxylation of aldehydes. *Tetrahedron Lett.* **2003**, *44*, 8293–8296.
- (21) Brown, S. P.; Brochu, M. P.; Sinz, C. J.; MacMillan, D. W. C. The direct and enantioselective organocatalytic  $\alpha$ -oxidation of aldehydes. *J. Am. Chem. Soc.* **2003**, *125*, 10808–10809.
- (22) Sulzer-Mossé, S.; Tissot, M.; Alexakis, A. First enantioselective organocatalytic conjugate addition of aldehydes to vinyl phosphonates. *Org. Lett.* **2007**, *9*, 3749–3752.
- (23) Marigo, M.; Wabnitz, T. C.; Fielenbach, D.; Jørgensen, K. A. Enantioselective organocatalyzed  $\alpha$  sulfenylation of aldehydes. *Angew. Chem., Int. Ed.* **2005**, *44*, 794–797.
- (24) Hartikka, A.; Arvidsson, P. I. Rational design of asymmetric organocatalysts - Increased reactivity and solvent scope with a tetrazolic acid. *Tetrahedron Asymmetry* **2004**, *15*, 1831–1834.
- (25) Marigo, M.; Schulte, T.; Franzén, J.; Jørgensen, K. A. Asymmetric multicomponent domino reactions and highly enantioselective conjugated addition of thiols to  $\alpha,\beta$ -unsaturated aldehydes. *J. Am. Chem. Soc.* **2005**, *127*, 15710–15711.
- (26) Zhong, G. A Facile and Rapid Route to Highly Enantiopure 1,2-Diols by Novel Catalytic Asymmetric  $\alpha$ -Aminooxylation of Aldehydes. *Angew. Chem Int. Ed.* **2003**, *42*, 4247–4250.
- (27) Borths, C. J. *Investigations in enantioselective catalysis. Development of novel asymmetric organocatalytic reactions*; California Institute of Technology, Pasadena, 2004.
- (28) Brown, S. P. *Iminium and enamine activation: methods for enantioselective organocatalysis*; California Institute of Technology, Pasadena, 2005.
- (29) Paras, N. A. *Enantioselective organocatalytic Friedel-Crafts alkylations of heterocycles and electron-rich benzenes*; California Institute of Technology, Pasadena, 2004.
- (30) Larsen, C. H. M. *Investigating imidazolidinone catalysts: enantioselective organocatalytic Diels–Alder reactions, conjugate additions to access non-natural  $\alpha$ -amino acids, and bimodal catalyst activation for the development of organo-cascade reactions*; California Institute of Technology, Pasadena, 2005.

### Out-of-sample

- (1) Bertelsen, S.; Dinér, P.; Johansen, R. L.; Jørgensen, K. A. Asymmetric organocatalytic  $\beta$ -hydroxylation of  $\alpha,\beta$ -unsaturated aldehydes. *J. Am. Chem. Soc.* **2007**, *129*, 1536–1537.
- (2) List, B. Direct catalytic asymmetric  $\alpha$ -amination of aldehydes. *J. Am. Chem. Soc.* **2002**, *124*, 5656–5657.

### Out-of-sample synergistic

- (1) Zhou, S.; Fleischer, S.; Junge, K.; Beller, M. Cooperative Transition-Metal and Chiral Brønsted Acid Catalysis: Enantioselective Hydrogenation of Imines to Form Amines. *Angew. Chem., Int. Ed.* **2011**, *50*, 5120–5124.

- (2) Chase, P. A.; Welch, G. C.; Jurca, T.; Stephan, D. W. Metal-Free Catalytic Hydrogenation. *Angew. Chem., Int. Ed.* **2007**, *46*, 8050–8053.
- (3) Allen, A. E.; MacMillan, D. W. C. Enantioselective  $\alpha$ -Arylation of Aldehydes via the Productive Merger of Iodonium Salts and Organocatalysis. *J. Am. Chem. Soc.* **2011**, *133*, 4260–4263.
- (4) Allen, A. E.; MacMillan, D. W. C. The Productive Merger of Iodonium Salts and Organocatalysis: A Non-photolytic Approach to the Enantioselective  $\alpha$ -Trifluoromethylation of Aldehydes. *J. Am. Chem. Soc.* **2011**, *132*, 4986–4987.
- (5) Ibrahim, I.; Santoro, S.; Himo, F.; Córdova, A. Enantioselective Conjugate Silyl Additions to  $\alpha$ ,  $\beta$ -Unsaturated Aldehydes Catalyzed by Combination of Transition Metal and Chiral Amine Catalysts. *Adv. Synth. Catal.* **2011**, *353*, 245–252.

### Thesis Mining

We supplemented our dataset curated from scientific journals with experimental data obtained from Ph.D. theses that have been made available to the public. Considering the goal of this effort was to gather negative data, our general approach was based on the premise that screening data gathered during the development of a published method would likely be included in the author's thesis as part of their Ph.D. requirements. Therefore, one could in principle search for the author's Ph.D. thesis from the relevant repository. Using this focused search criteria, we extracted relevant data from sources 27 to 30 as outlined on page S343 via <https://thesis.library.caltech.edu/cgi/search/simple>.



## Model development

Measured  $\Delta\Delta G^\ddagger$  values were calculated using the formula  $\Delta\Delta G^\ddagger = -RT\ln(er)$  where R is the gas constant, T is temperature, and er is the enantiomeric ratio. From the survey of reactions, we categorized the data set by catalyst structure (steric blocking or hydrogen bonding) wherein reactions catalyzed by imidazolidinone and diphenylprolinol ethers are binned by +ee and proline type catalysts as a -ee. Linear regression models were developed using an in-house script implemented in MATLAB<sup>®</sup> (version R2018b), to obtain the predicted  $\Delta\Delta G^\ddagger$ . Forward stepwise linear regression was employed for model development with previously reported algorithms,<sup>16</sup> with small changes in input as a consequence of the number of parameters screened to describe the system under study. These changes included the removal of parameters that measure similar features i.e. collinear parameters were automatically removed, defined by 0.3 collinear criteria. With the truncated parameter set in hand, the algorithm proceeds by performing single parameter regression with each descriptor (x). The 20 descriptors with the highest R<sup>2</sup> values are used as a start point for building two parameter correlations. These are constructed by adding a second parameter to the previously identified 20 univariate correlations to generate 20x models. As before, the 20 two parameter models with the highest R<sup>2</sup> values are taken forward to generate three parameter correlations. This sequence is performed until the user terminates parameter addition or the R<sup>2</sup> does not increase. Because mechanistic analysis is a secondary goal of the workflow, we try to limit the number of parameters included in an equation and we purposely do not include cross-terms in our model search.

As the model search process can produce a large pool of model candidates, we truncated the models on the recorded statistics as well as the number of included parameters (in more detail below).

The generalized model structure consists of a constant term, first-ordered parameters (P) and their coefficients ( $\beta$ ). In some cases, interactions between parameters would also lead to cross terms ( $P_j \cdot P_k$ ).

$$\Delta\Delta G^\ddagger = const. + \sum_i \beta_i P_i$$

The predictions provided by the models would then be fitted to the measured results to visualize and further evaluate the model performances. In the resulting equations (shown below in generalized form), the slope would have the same value as R<sup>2</sup>, and the intercept corresponds to the variance in experimental results in which the included parameters could not account for.

$$(measured\Delta\Delta G^\ddagger) = slope \cdot (predicted\Delta\Delta G^\ddagger) + intercept$$

Normalized parameters were employed so that the coefficients would be reflective of the importance of each descriptor. Normalization is the operation of extracting the mean value ( $\mu$ ) then dividing by the standard deviation ( $\sigma$ ).

$$P_{norm} = \frac{P - \mu_P}{\sigma_P}$$

A good linear correlation ( $R^2$  close to 1.0 and intercept close to 0.0) between the predicted  $\Delta\Delta G^\ddagger$  and the measured  $\Delta\Delta G^\ddagger$  indicates that the obtained model adequately approximates the system under study.

### **Model validation**

Models were validated using external and cross-validation techniques. Cross-validation generally refers to the statistical method of excluding part of the dataset as validations, predicting their values using the remaining set of data, evaluating the predictions, and repeating the process to reduce variability. Such analysis is generally employed to test the stability of a model and identify if overfitting occurs. Leave-one-out cross-validation is where only one data point would be removed each time and predicted by the remaining set. All validation predictions would then be combined and fitted to the measured values, the  $R^2$  value of the resulting fit is called  $Q^2$ .

Another method to test model robustness is  $k$ -fold cross-validation. In this validation method, the dataset is divided randomly into  $k$  subsets with same/similar sizes, each set would then be predicted out by the other  $k-1$  subsets, and the goodness of fit would be tested based on these predictions. However, it is important to note that the  $k$ -fold statistics is dependent on the partitioning of the dataset, and that there's a necessity of executing the process multiple times for average results.

The 452 reactions were split into 80:20 TS:VS sets for external validation. The split was partitioned based on the response values using the MATLAB “*equidistant*” function. This process can be described as pseudorandom as it is generated using a deterministic algorithm.

As another model test, we have created models wherein the descriptors (1 substrate, 2 reactant, 7 cat, 3 solvent) are replaced with dummy values (random numbers on a normal distribution) to create a meaningless reaction barcode. The statistical scores are much worse ( $R^2 = 0.69$ ,  $Q^2 = 0.65$ ,  $LOO = 0.63$ , 10-fold CV = 0.62), suggesting that the DFT descriptors are correlating something meaningful.

All data associated with model construction and predictions are encompassed in the accompanying excel spreadsheet. We also include key plots below.

Secondary amine model (with validations)

$$\begin{aligned} \Delta\Delta G^\ddagger = & 0.31 + 0.27L_S - 0.21HOMO + 0.17pol + 0.39iNH \\ & + 1.60NBO_{C1} - 0.49NBO_{A2} + 1.43B5_{C1up} - 0.57B5_{C1down} + \\ & 0.42LUMO - 0.11HOMO - 0.03KS + 0.30CI + 0.182DShape \end{aligned}$$

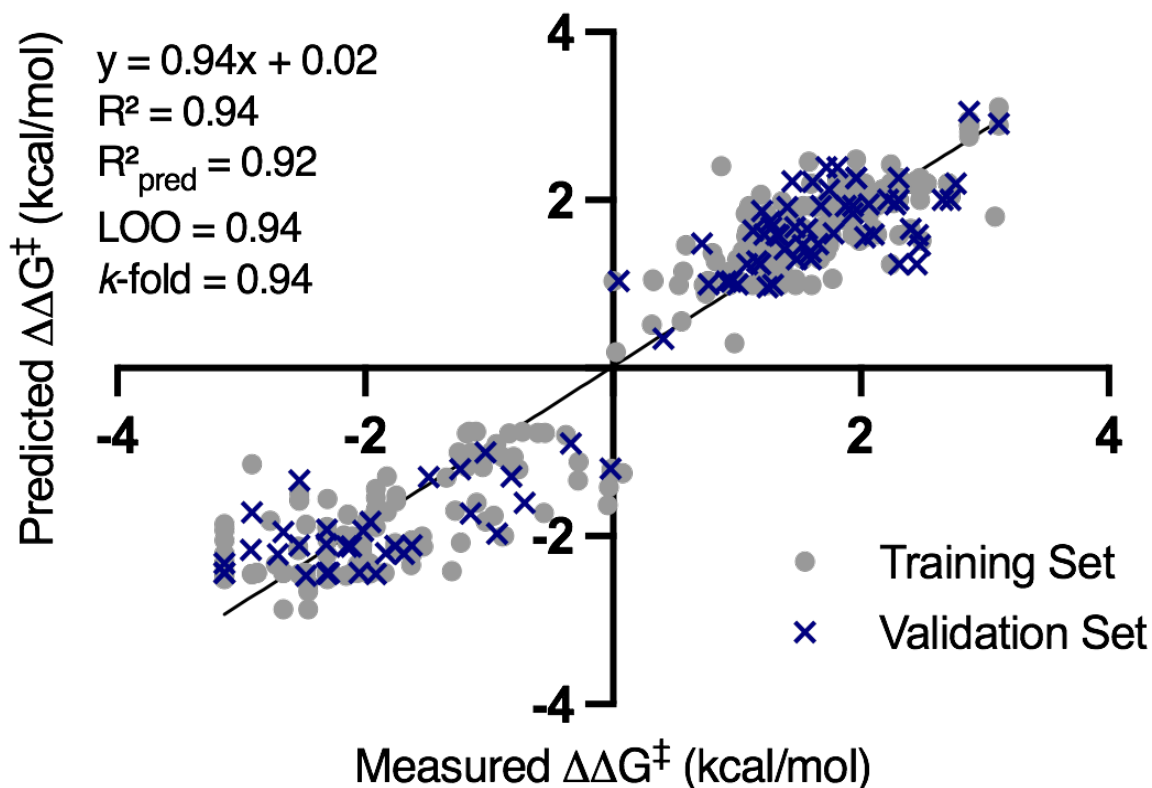

KS = kier alpha modified shape index

CI = averaged valence connectivity index chi-5

2DShape = Petitjean 2D shape

See page S341 for the definition of the additional descriptors.

Secondary amine model (all data as training)

$$\Delta\Delta G^\ddagger = 0.31 + 0.28L_S - 0.23HOMO + 0.17pol + 0.39iNH + 1.55NBO_{C1} - 0.55NBO_{A2} + 1.48B5_{C1up} - 0.58B5_{C1down} + 0.47LUMO - 0.11HOMO - 0.04KS + 0.31CI + 0.192DShape$$

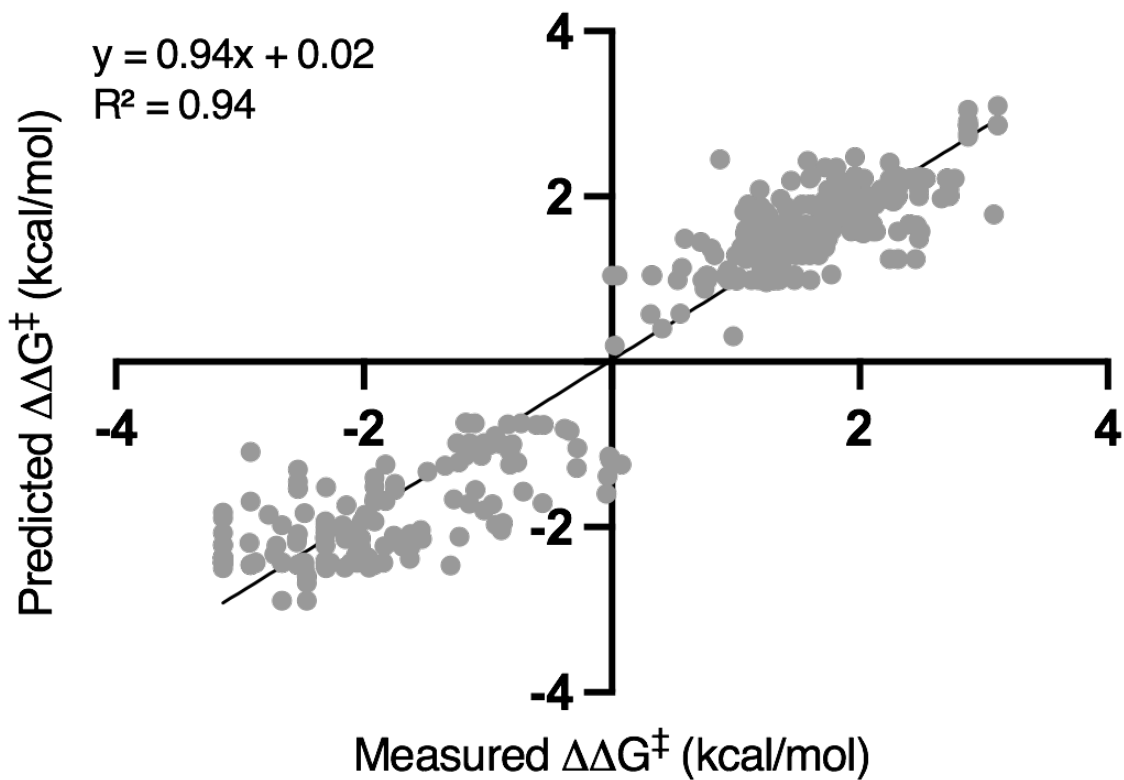

For some examples, the reactions were performed with mixed solvent systems. We reasoned that because solute-solvent interactions with polar substances will likely dominate over those with non-polar molecules, we collected topological, two-dimensional descriptors from the solvent with the largest dielectric constant. To test this impact of adding a second solvent (often non-polar) to the reaction we averaged the three solvent descriptors (kier alpha modified shape index, averaged valence connectivity index chi-5, and Petitjean 2D shape) taken from both solvents. Ultimately, modeling the solvent mixtures with averaged parameters is not critical since the statistical models obtained are almost identical.

$$\Delta\Delta G^\ddagger = 0.31 + 0.26L_S - 0.23HOMO + 0.18pol + 0.35iNH + 1.67NBO_{C1} - 0.42NBO_{A2} + 1.37B5_{C1up} - 0.56B5_{C1down} + 0.37LUMO - 0.10HOMO + 0.02KS + 0.28CI + 0.152DShape$$

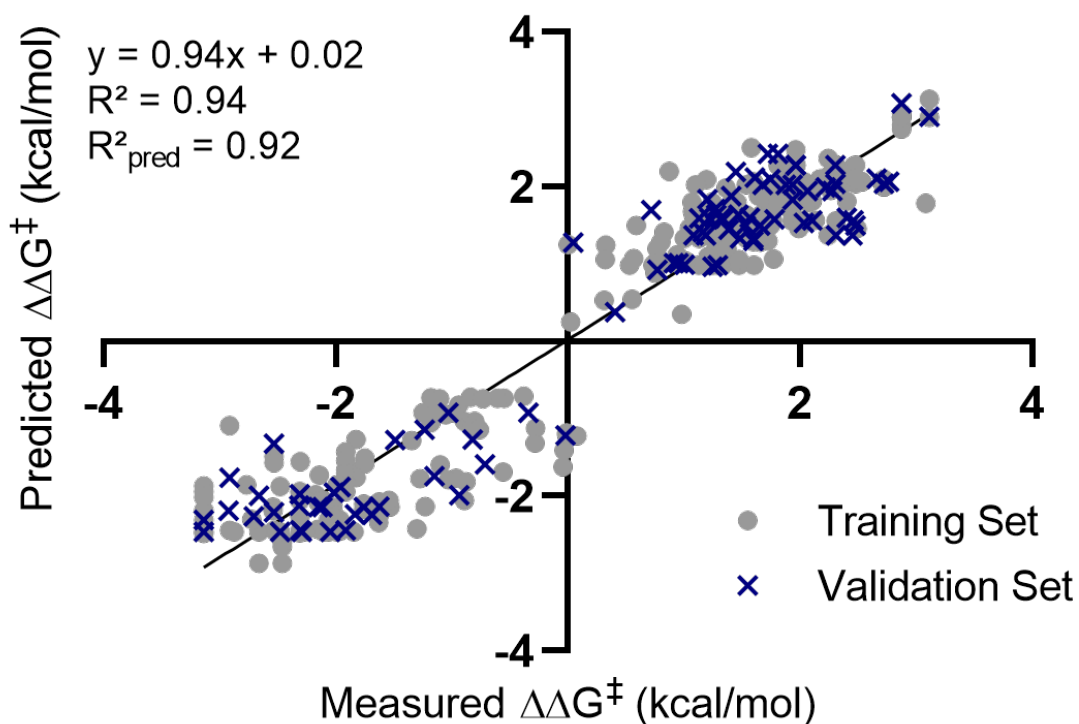

As part of our analysis in connecting the model terms to transition state features, we suggested that the polarizability likely acts as a proxy for chemical size. To probe this further we correlated polarizability against molecular surface area (MSA) for a subset of reactants and show that there is a strong positive correlation. We choose not to include MSA as a parameter for all the reactants since it requires importing structures into an additional program and performing another calculation. For precise structures of the reactants included in this correlation please see the accompanying excel spreadsheet.

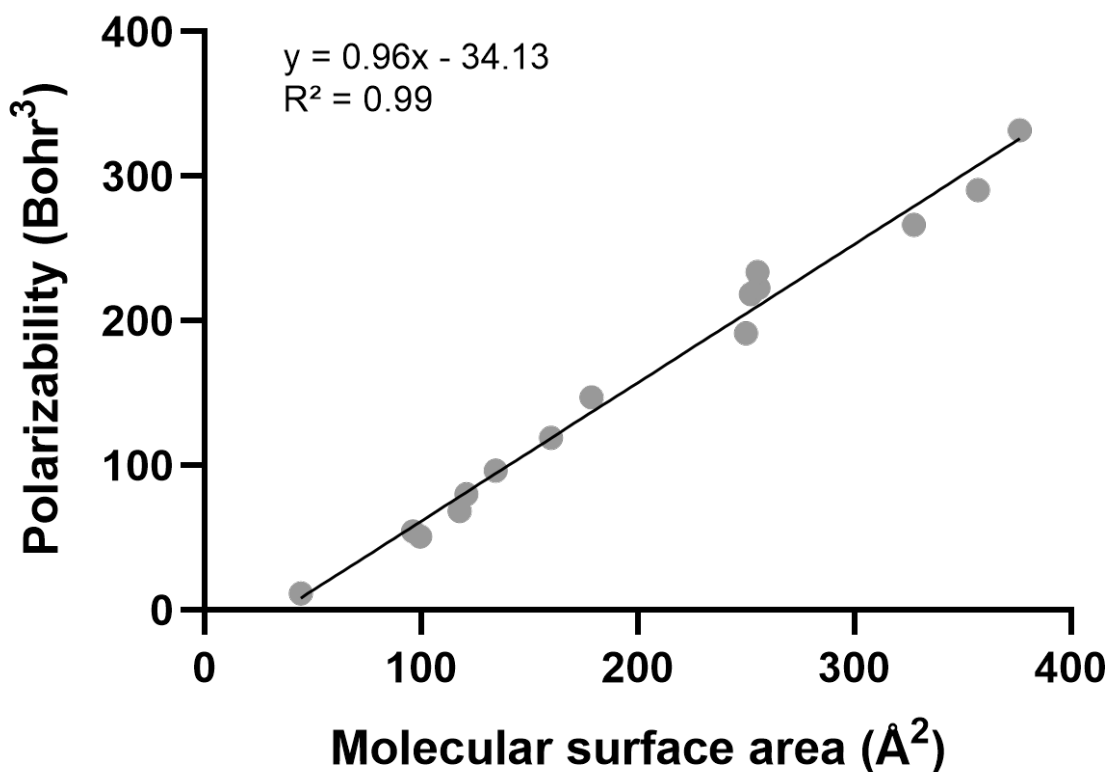

## Out-of-sample predictions

We evaluated the model's ability to transfer the mechanistic principles leading to enantioselective catalysis captured by the statistical models to reactive intermediates generated from a second achiral catalyst. Treating the test reactions as virtual predictions prediction accuracy was determined by both enantioselectivity values and the average absolute  $\Delta\Delta G^\ddagger$  error ( $\Delta\Delta G^\ddagger$  error = absolute(model measured – experimentally measured/ no. of examples).

### Using the secondary amine catalyst model:

We next validated the secondary amine model by testing its ability to extrapolate to new reaction types involving a single catalyst. As described in the main text, when tested against two different reactions, the model predicted the experimental data exceptionally well. Assessing the model's ability to predict low ee data would provide a different test of the model's capabilities. To accomplish this, we removed the only extensive catalyst screening data that was available (obtained from a Ph.D. thesis) from the training set and used these as the out-of-sample prediction platform. The model was retrained using the same parameters (but without these 7 catalyst data points) and, the resulting model was applied to predict the results of the catalyst screen. As shown below, the model also provided decent predictions for this catalyst screen despite the limited training data in that enantioselectivity range i.e. 0–70% ee.

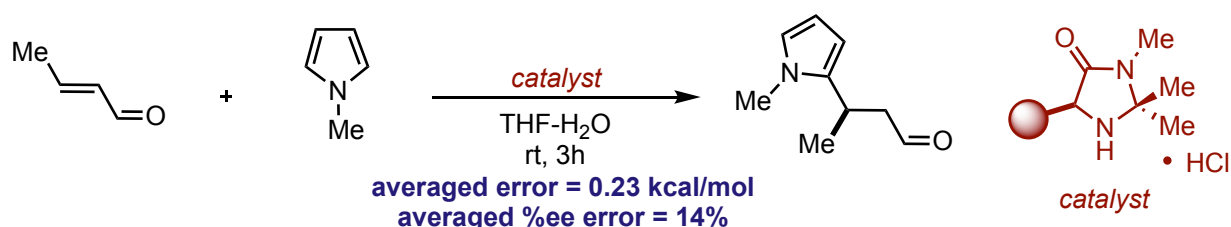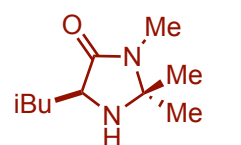

experiment 33% ee  
predicted 33% ee

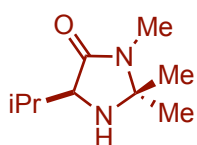

experiment 26% ee  
predicted 46% ee

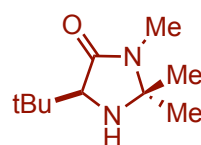

experiment 68% ee  
predicted 24% ee

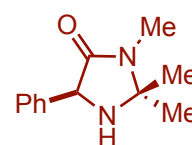

experiment 2% ee  
predicted 15% ee

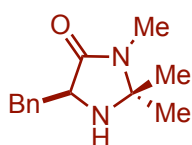

experiment 66% ee  
predicted 70% ee

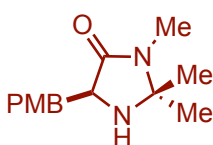

experiment 56% ee  
predicted 65% ee

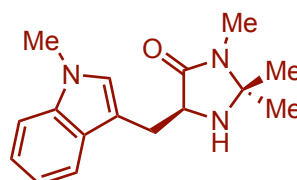

experiment 66% ee  
predicted 76% ee

Secondary amine model used to predict the catalyst set

$$\Delta\Delta G^\ddagger = 0.31 + 0.28L_s - 0.23HOMO + 0.17pol + 0.39iNH + 1.51NBO_{C1} - 0.56NBO_{A2} + 1.48B5_{C1up} - 0.58B5_{C1down} + 0.47LUMO - 0.11HOMO - 0.05KS + 0.31CI + 0.192DShape$$

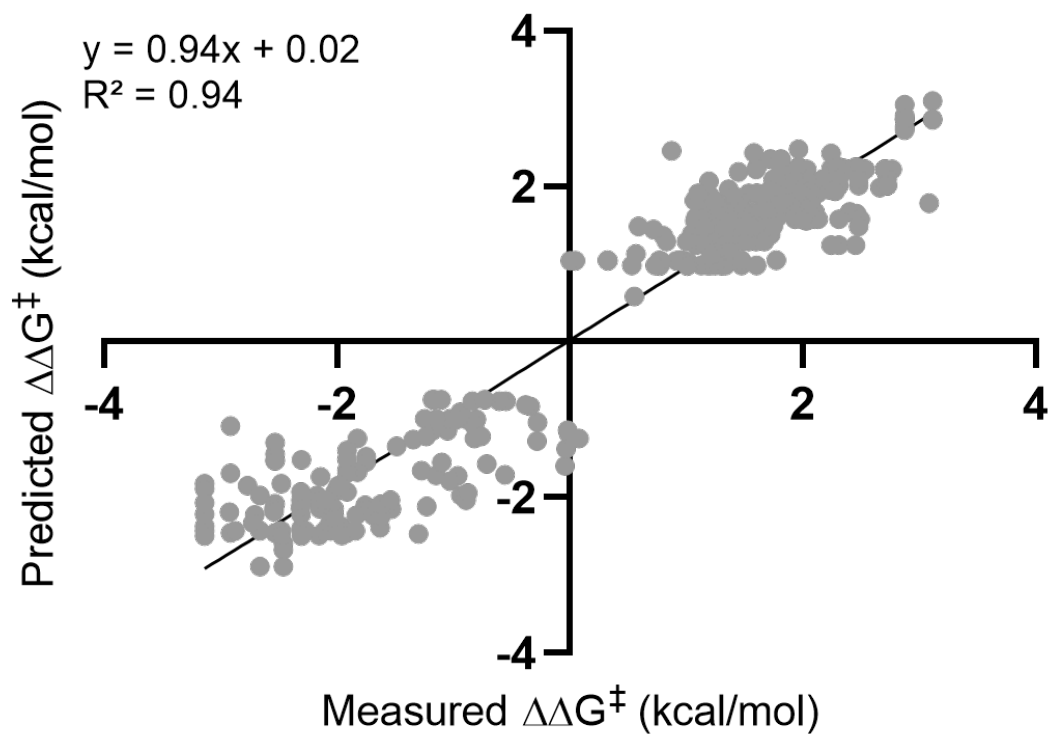



*Adjusted secondary amine model*

As part of the exploration on predicting out-of-sample, we discovered replacing the HOMO with a HOMO-LUMO term could lead to a more generalizable model.

$$\Delta\Delta G^\ddagger = 0.31 + 0.33L_s + 0.08\text{HOMO-LUMO} + 0.21\text{pol} + 0.30\text{iNH} \\ + 1.76\text{NBO}_{C1} - 0.25\text{NBO}_{A2} + 1.42\text{B5}_{C1\text{up}} - 0.59\text{B5}_{C1\text{down}} + \\ 0.35\text{LUMO} - 0.08\text{HOMO} + 0.03\text{KS} + 0.28\text{CI} + 0.20\text{DShape}$$

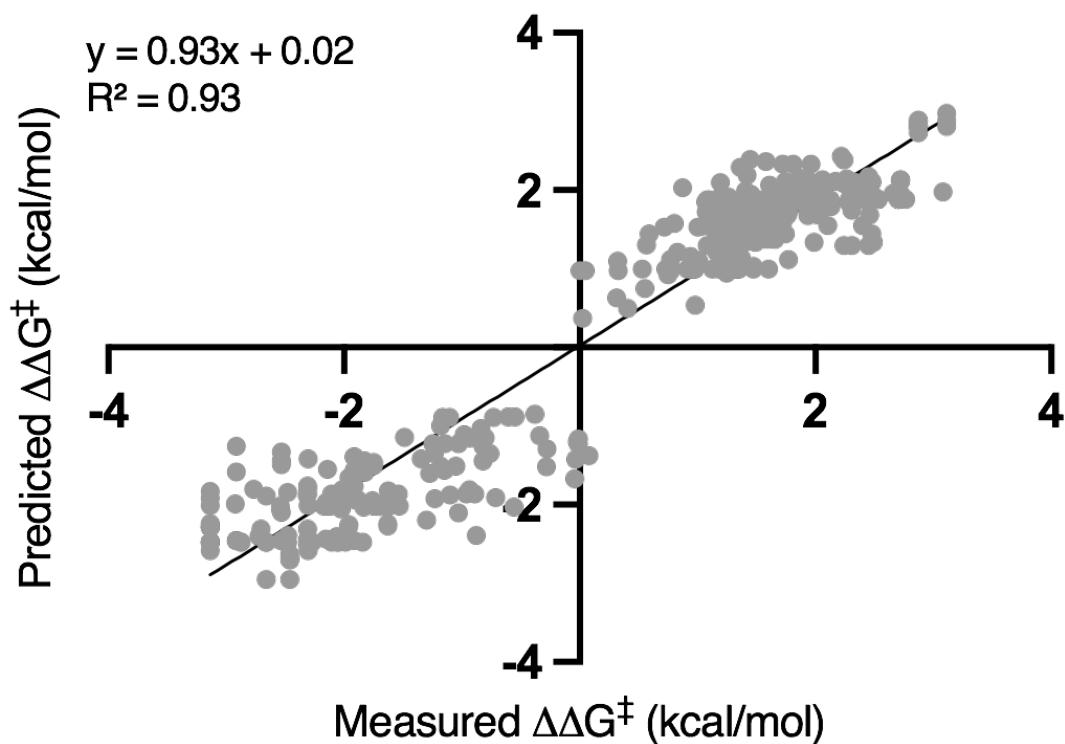

**Using the chiral phosphoric acid catalyzed published model:**

Because the nucleophile terms were not sensitive to the change in method required to optimize the iron complex, we could deploy the published dataset without any modification. This included using all the available data as the training set, re-creating the statistical model in MATLAB, and using this as a platform to extrapolate to multi-catalysis. Initially, reaction performance was evaluated using the comprehensive model to determine the mechanistic pathway under operation, these predictions could then be further refined with the specific models (*Z*-imine). This two-tiered workflow is imperative as the process avoids mechanistic assumptions, ensuring that the results of the test reactions are unknown. Below we show the statistical models utilized and describe the necessary model parameters required for prediction. To be specific we collected the H-X-CNu, and B5Nu from the achiral iron complex.

Comprehensive model

$$\Delta\Delta G^\ddagger = 0.42 + 0.30\text{sol} - 0.86\text{NBO}_N - 0.83\text{NBO}_C + 0.40\text{L}_S + 0.63\text{H-X-C}_{\text{Nu}} + 0.23\text{L}_{\text{Cat}}$$

$$y = 0.88x + 0.05$$
$$R^2 = 0.88$$

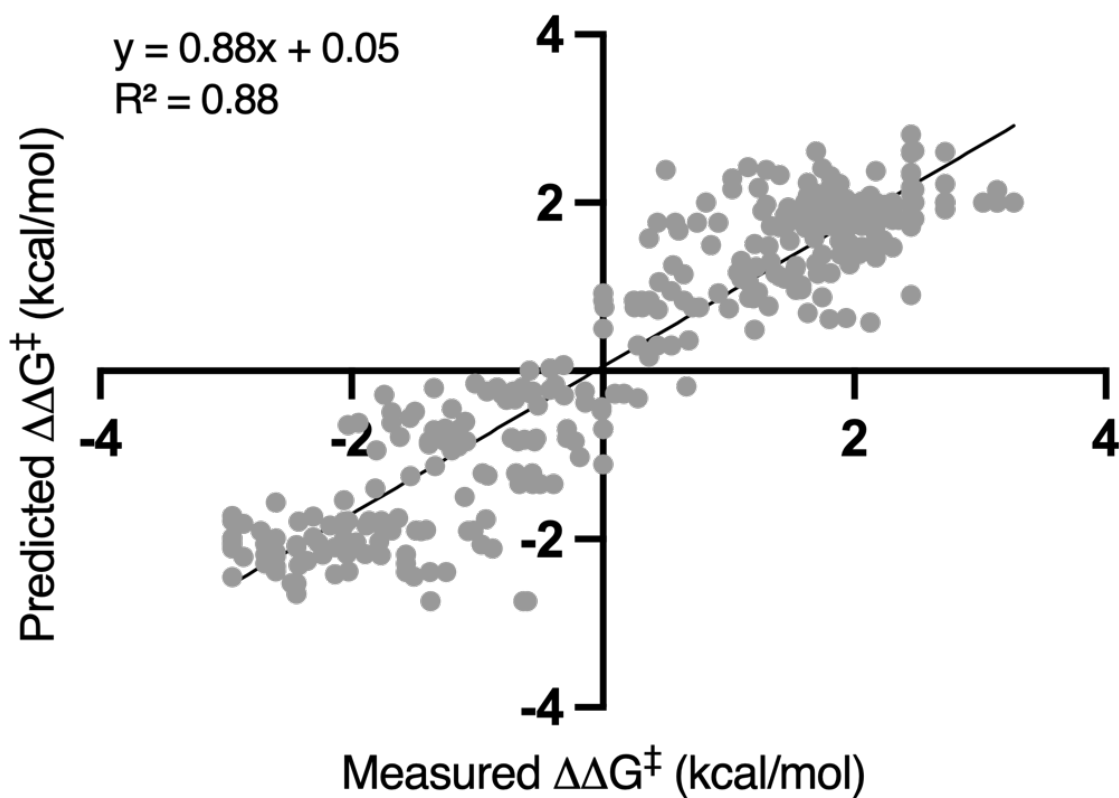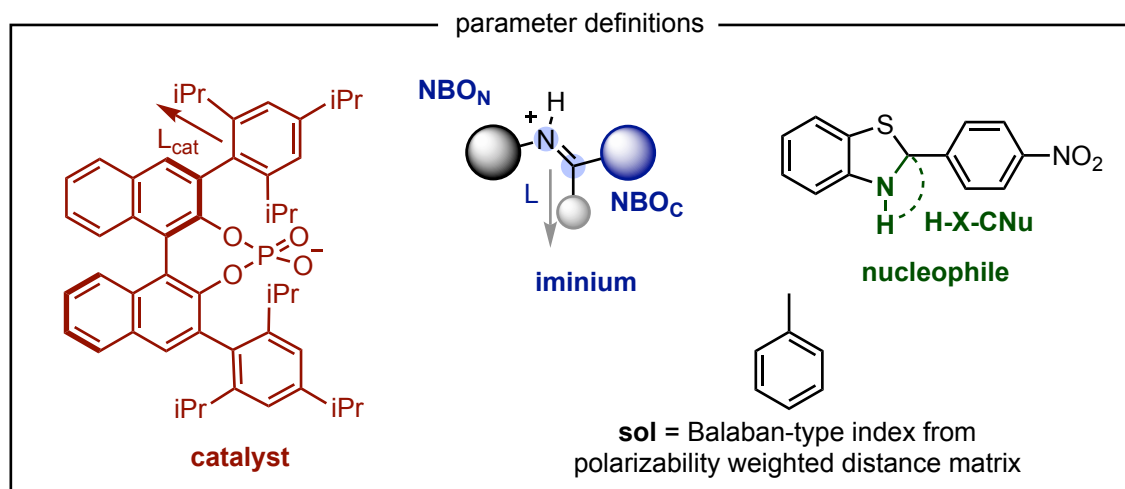

Z-imine model

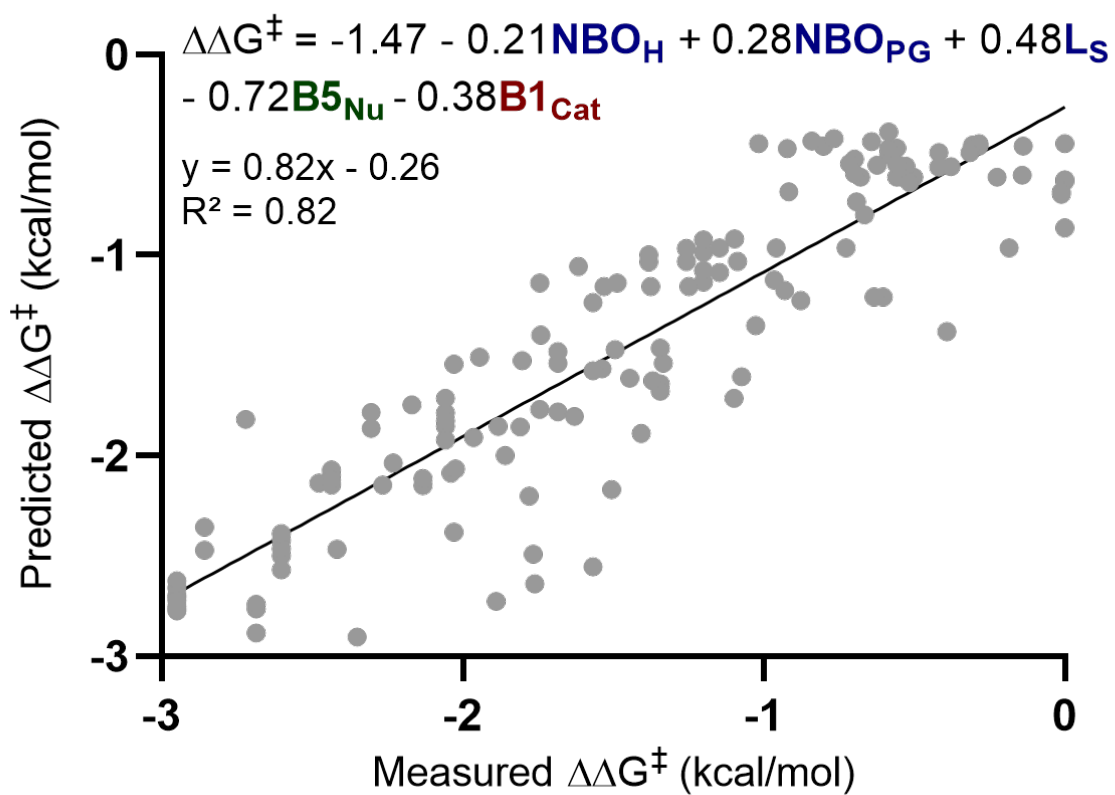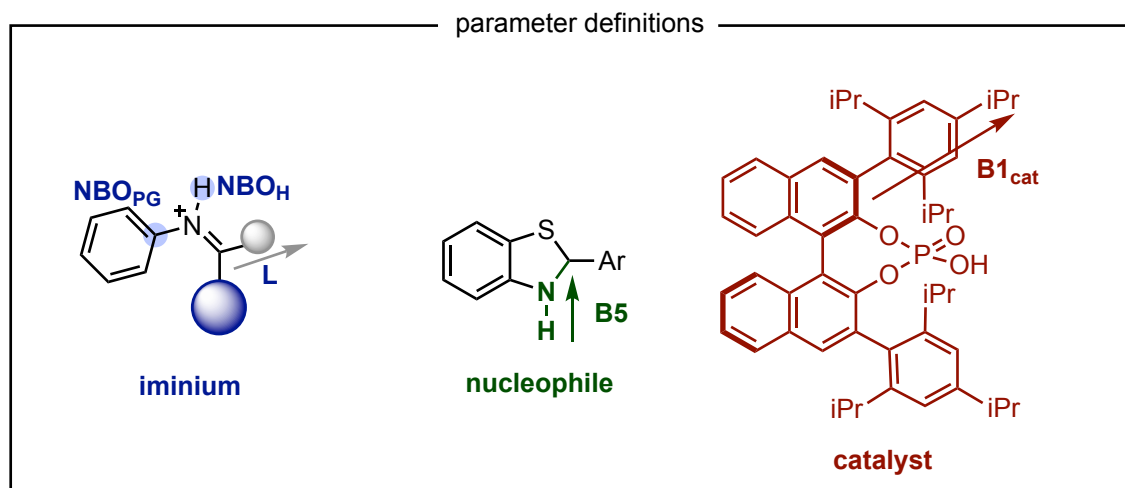

### More details about imine parameters

We derive parameters from both the *E* and *Z* iminium, since both configurations are important in dictating the enantioselectivity. As outlined in the previous publication, *E*-iminium descriptors are employed for comprehensive model and *Z*-iminium descriptors for the focused model. From these DFT optimized structures NBO charges and Sterimol values of specific substituents are required. Sterimol values were calculated using the Bondi radii from the small substituent (S). NBO charges were calculated for the molecule and the necessary charges collected from specific atoms on the iminium (e.g. N, C, H and the first atom of the protecting group PG).

### More details about nucleophile parameters

Sterimol B5 value of the entire nucleophile unit and the H-X-CNu angle measurement are necessary for prediction. For most nucleophiles, such as alcohols, the H-bond that holds the nucleophile to the catalyst is in line with the nucleophilic site. Inspired by the work of Goodman, “angle” measurements have been used to numerically describe this feature.<sup>17</sup> Nucleophiles with this geometric feature are classified as linear therefore geometrically assigned an “angle” of 180° i.e., H-X-Nu is 180° even when X=Nu. However, in some cases, the bond may be displaced to one side and these molecules have smaller H-X-Nu angles. A second angle measurement, H-X-CNu, is employed for displaced nucleophiles to describe a larger angle. This angle is defined from the H, X and the atom that is attached to the nucleophilic site if the nucleophilic site is not carbon. H-X-Nu = H-X-CNu if Nu = C.

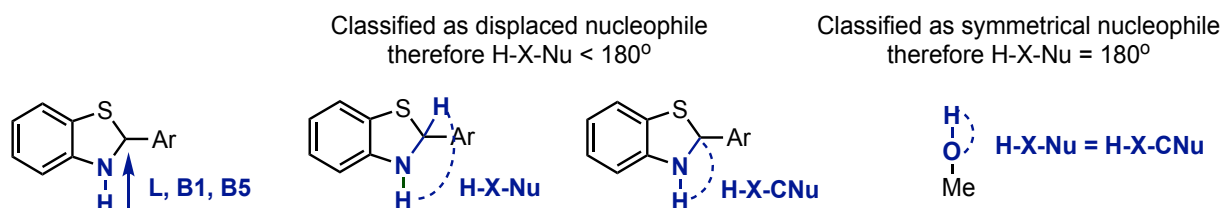

### More details about catalyst and solvent parameters

Solvent descriptors were acquired from the molecular descriptors application available in Maestro using default settings. Sterimol parameters were acquired for the whole catalyst aromatic group and the 2-substituent as defined above.

More detailed parameter descriptions can be found in ref 10.

**Using the chiral phosphate catalyzed published model:**

We expected that the NBO charges would be highly sensitive to the change in method required to optimize the gold-activated allenamides. Thus, all iminium components required to build the previously reported model were optimized at the M06/def2TZVP level and the necessary parameters acquired from these structures. Employing these parameters in combination with the previously published nucleophile and catalyst descriptors, the model was re-created in MATLAB using all the available data as the training set. The resulting model was then used to predict the enantioselectivity outcome when organometallic intermediates (Gold intermediate 1 to 3) were used as the electrophilic component in an [Au(I)]-Catalyzed Dearomatization of  $\beta$ -Naphthols with Allenamides.

$$\Delta\Delta G^\ddagger = -0.08 - 0.35\text{NBO}_S + 0.02\text{B1}_L + 0.19\text{pol} + 0.69\text{NBO}_{\text{Nu}} - 0.30\text{L}_{\text{Nu}} - 0.77\text{B5}_{\text{C5}} + 0.34\text{L}_{\text{C6}} + 0.25\text{PO}_{\text{as}}$$

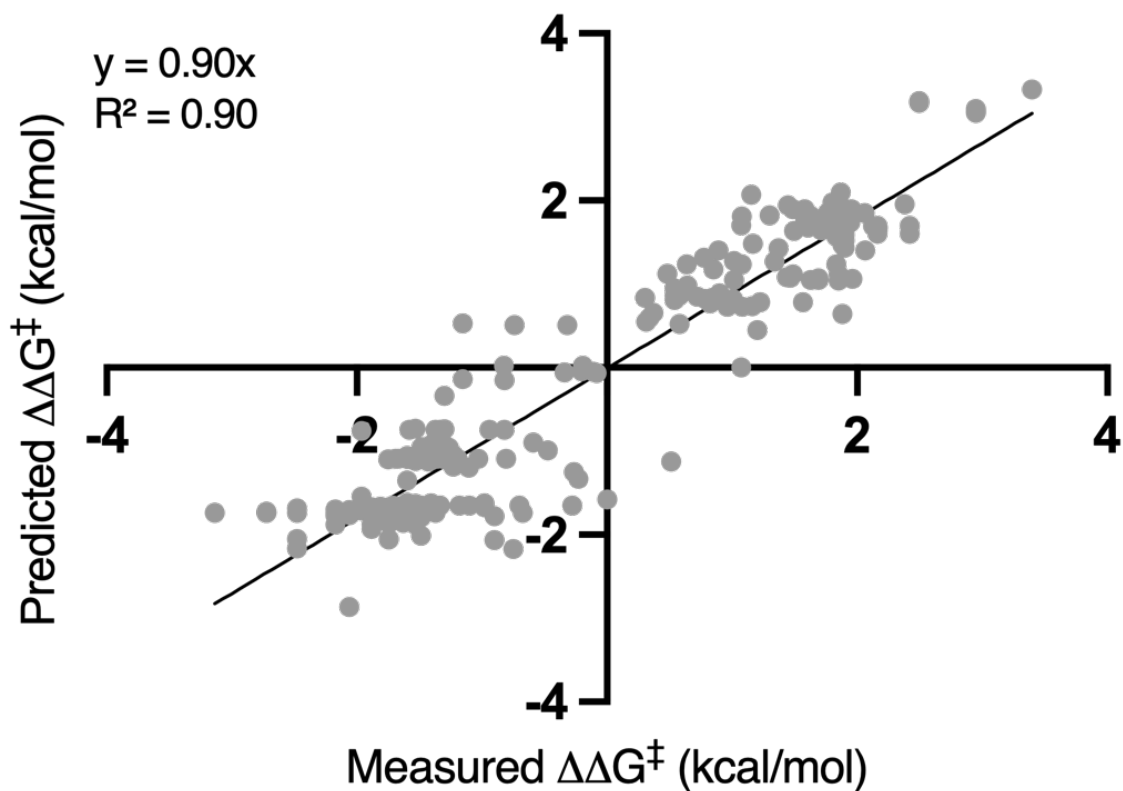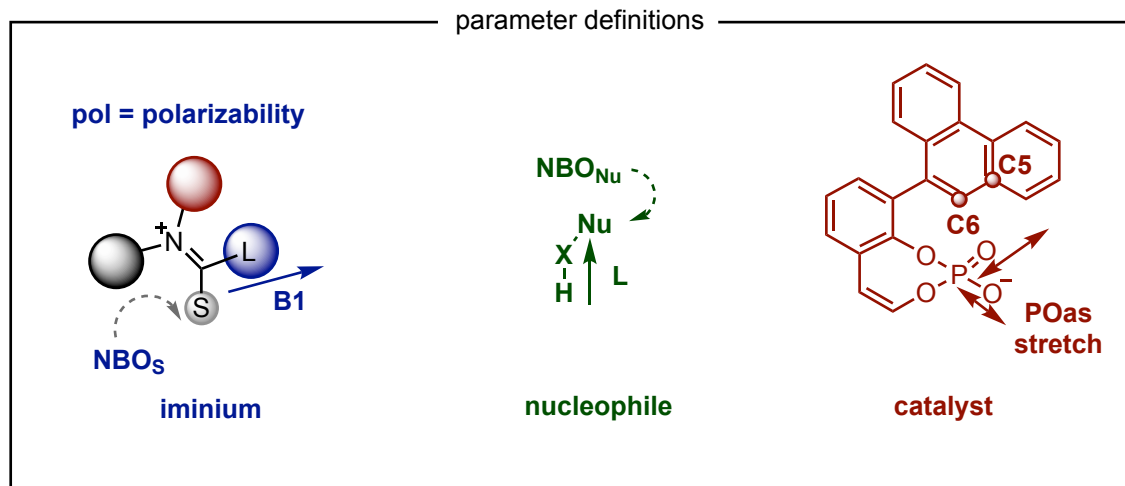

### More details on the iminium parameters

From the ground state DFT optimized iminium structure NBO charges and Sterimol values of the necessary substituent (SubR, SubEWG, SubL, and SubS) in addition to polarizability were calculated and collected. Specifically, the NBO of the first atom on the small group (S) and the Sterimol L value of the large group (L) was gathered.

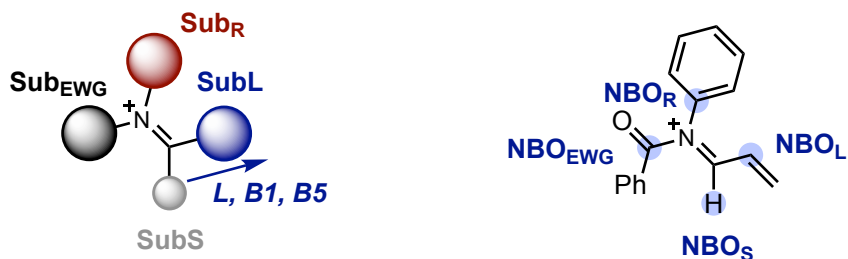

### More details on the nucleophile parameters

Sterimol B5 value of the entire nucleophile unit and the NBO charge of the nucleophilic site were necessary for prediction.

### More details on the model catalyst parameters

The vibration term POas (the asymmetric P–O stretching frequency) and Sterimol values from the C5 and C6 positions were calculated and collected from simple model phosphoric acid structures.

**More detailed parameter descriptions can be found in ref 11.**



## Unsuccessful reactions

Attempted reactions involving 2-phenylcyclohexanone were unsuccessful i.e. gave no conversion to the product under the mult catalysis conditions. Despite the fact that naphthols which are operationally similar and work well (i.e. thought to proceed through the same mechanism).

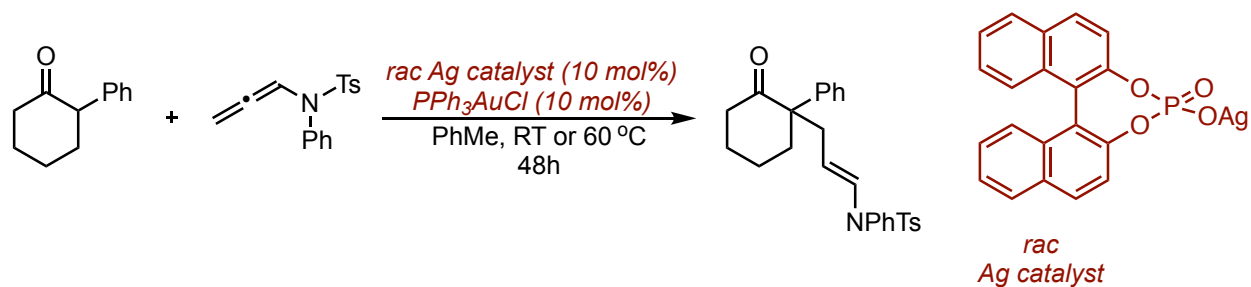

We also changed the allenamide structure to one which has been reported to work in combination with 2-phenylcyclohexanone under chiral acid only conditions see X. Yang and F. D. Toste, *Chem. Sci.* 2016, 7, 2653–2656.

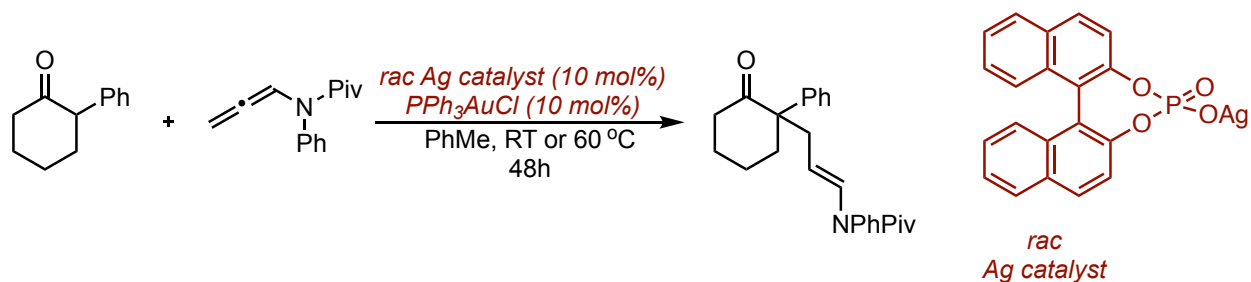

However, under the gold catalysis conditions we noted significant decomposition of the Piv-substituted allenamide and no product was observed.

## General experimental information

All commercial reagents were used as received; all solvents are HPLC grade dried and degassed with Solvent Purification System (SPS). The *N*-phenyl-*N*-sulfonylallenamide **1**,<sup>18</sup> (*R*)-phosphoric acids<sup>19</sup> and the chiral silver phosphates<sup>20</sup> were obtained following known procedures. Flash chromatography was carried out using 230-400 mesh silica gel and dry-packed columns. Thin layer chromatography was carried out using Merck TLC Silica gel 60 F254 aluminum sheets. Components were visualized by UV light ( $\lambda = 254$  nm) and stained with phosphomolybdic dip. NMR spectra were recorded at 298 K on a Bruker Avance 400dir Ultrashield apparatus. CDCl<sub>3</sub> was used as internal standard for <sup>13</sup>C NMR and <sup>1</sup>H NMR spectra. Chemical shifts are given in ppm and coupling constants in Hz. High performance liquid chromatography (HPLC) was performed on Agilent Technologies chromatographs (1100 and 1200 Series), using Daicel Chiralpak AD-H columns. Optical rotation measurements were carried out on a Jasco P-2000 polarimeter.

### General procedure for synthesis of *rac*-3

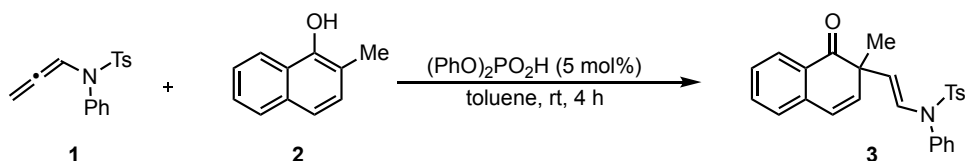

**Scheme S1.** Synthesis of *rac*-3

Under N<sub>2</sub> atmosphere, an oven dried flask was charged with 1 mL of anhydrous toluene, the *N*-phenyl-*N*-sulfonylallenamide **1** (42.8 mg, 0.15 mmol, 1.5 eq), the naphthol **2** (15.8 mg, 0.1 mmol, 1.0 eq), and Diphenyl phosphate (2.5 mg, 0.01 mmol, 10 mol%) were added and the reaction was kept stirring at room temperature for 4 hours. Then, the reaction mixture was directly transferred into silica gel column chromatography (Petroleum ether:AcOEt = 10:1) to afford compound *rac*-**3**.

### General procedure for enantioselective synergistic reactions

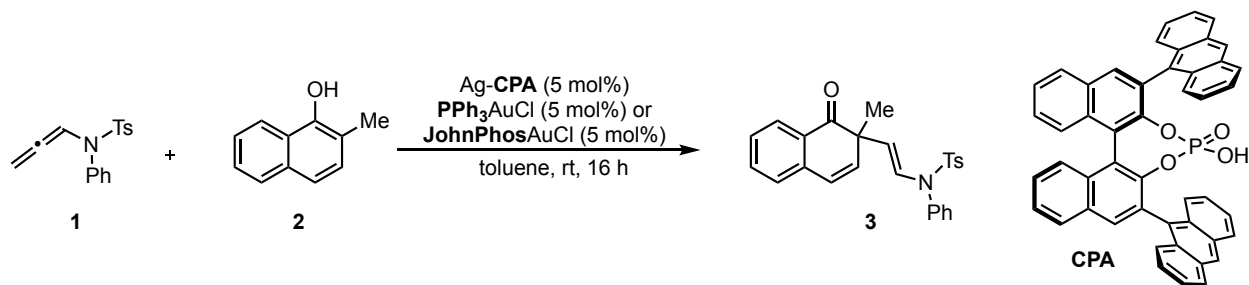

**Scheme S2.** Synthesis of **3** using the synergistic protocol.

Under N<sub>2</sub> atmosphere, an oven dried flask was charged with 1 mL of anhydrous toluene, PPh<sub>3</sub>-AuCl (2.5 mg, 0.005 mmol, 5 mol%) or JohnPhos-AuCl (2.6 mg, 0.005 mmol, 5 mol%) and Ag-(R)-CPA (4.0 mg, 0.005 mmol, 5 mol%). After stirring for 15 min in the dark, the *N*-phenyl-*N*-sulfonylallenamide **1** (42.8 mg, 0.15 mmol, 1.5 eq) and the naphthol **2** (15.8 mg, 0.1 mmol, 1.0 eq) were added and the reaction was kept stirring at room temperature until **2** was completely consumed (TLC) (around 16 h). Then, the reaction mixture was directly transferred into silica gel column chromatography (Petroleum ether:AcOEt = 10:1) to afford the desired compound **3**.

## Characterization data

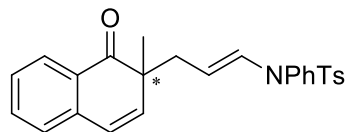

Orange oil. 30.0 mg, 68% yield.  $[\alpha]_D^{23} = -15.8$  ( $c = 0.1$ ,  $\text{CH}_2\text{Cl}_2$ )

**HPLC:** 76% ee (Daicel Chiralpak AD-H, hexane/*i*-PrOH = 90:10, flow rate 1.0 mL/min,  $\lambda = 254$  nm): minor isomer:  $t_R = 18.8$  min; major isomer:  $t_R = 21.9$  min.

**$^1\text{H}$  NMR (400 MHz,  $\text{CDCl}_3$ )**  $\delta$  7.80 (d,  $J = 7.7$  Hz, 1H), 7.52 (td,  $J = 7.5, 1.2$  Hz, 1H), 7.44 (d,  $J = 8.3$  Hz, 2H), 7.34 – 7.15 (m, 5H), 7.13 – 7.00 (m, 3H), 6.86 (d,  $J = 13.9$  Hz, 1H), 6.45 (d,  $J = 9.8$  Hz, 1H), 6.36 (d,  $J = 7.4$  Hz, 2H), 5.92 (d,  $J = 9.8$  Hz, 1H), 4.02 (m, 1H), 2.55 – 2.43 (m, 1H), 2.48 (s, 3H), 2.16 (m, 1H), 1.22 (s, 3H).

**$^{13}\text{C}$  NMR (101 MHz,  $\text{CDCl}_3$ )**  $\delta$  203.05, 143.53, 139.08, 138.40, 136.22, 135.68, 133.95, 131.22, 129.72, 129.55, 129.44, 129.36, 129.24, 129.09, 128.52, 127.54, 127.44, 127.21, 127.13, 126.54, 125.28, 124.14, 121.64, 105.77, 49.88, 41.81, 23.94, 21.56.

**IR (neat)** 3067, 3029, 2969, 2930, 1671, 1654, 1597, 1490, 1359, 1306, 1269, 1165, 1116, 1090, 1025, 946, 906  $\text{cm}^{-1}$

**HRMS (ESI)**  $m/z$   $[\text{M}+\text{Na}]^+$  ( $\text{C}_{27}\text{H}_{25}\text{NO}_3\text{SNa}$ ), calcd.: 466.1453; found: 466.1449.

# NMR spectra

## NMR of 3

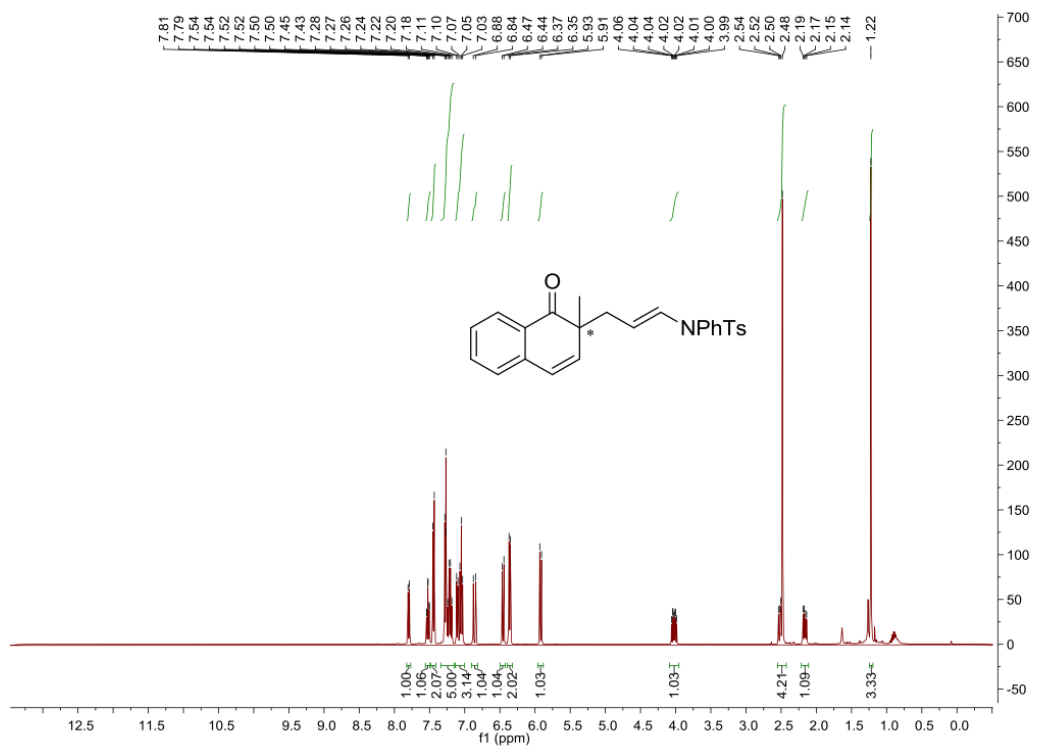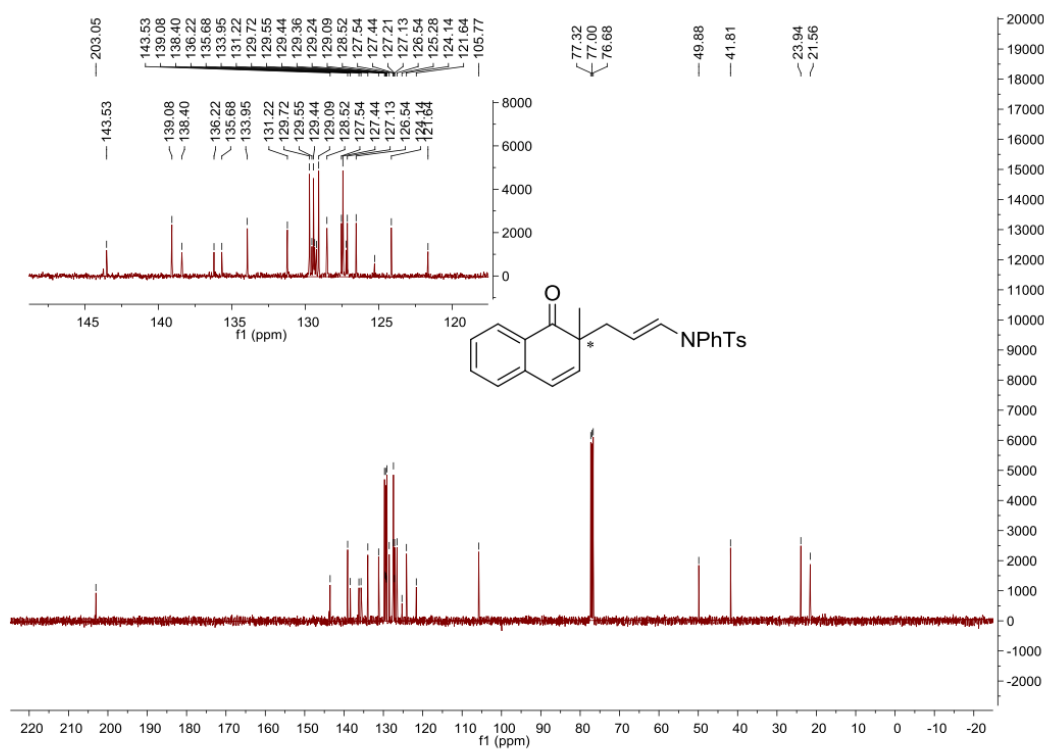

## HPLC chromatograms

### HPLC of *rac* 3

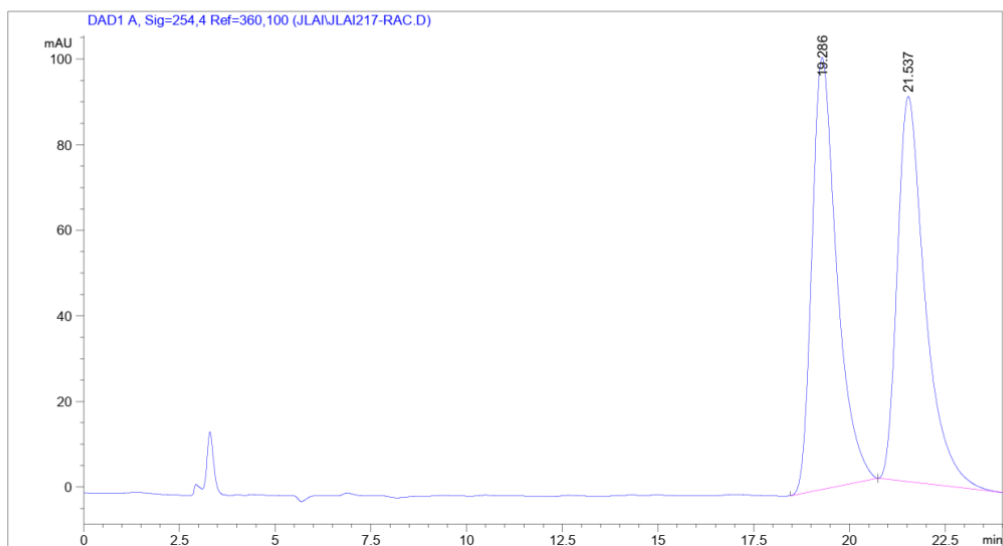

| Peak # | RetTime [min] | Type | Width [min] | Area [mAU*s] | Height [mAU] | Area %  |
|--------|---------------|------|-------------|--------------|--------------|---------|
| 1      | 19.286        | BB   | 0.6773      | 4562.80615   | 100.95540    | 50.1561 |
| 2      | 21.537        | BB   | 0.7496      | 4534.41309   | 90.02364     | 49.8439 |

### HPLC of **3** ( from reaction catalyzed by CPA-Ag and PPh<sub>3</sub>-AuCl )

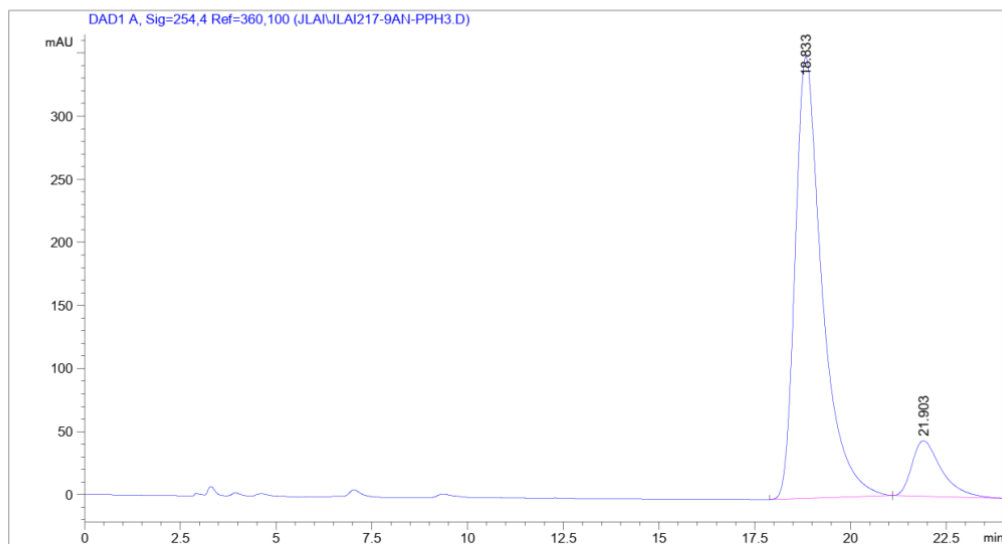

| Peak # | RetTime [min] | Type | Width [min] | Area [mAU*s] | Height [mAU] | Area %  |
|--------|---------------|------|-------------|--------------|--------------|---------|
| 1      | 18.833        | BB   | 0.7254      | 1.71448e4    | 350.08804    | 87.8554 |
| 2      | 21.903        | BB   | 0.8038      | 2370.00391   | 44.04052     | 12.1446 |

### HPLC of 3 (from reaction catalyzed by CPA-Ag and JohnPhos-AuCl)

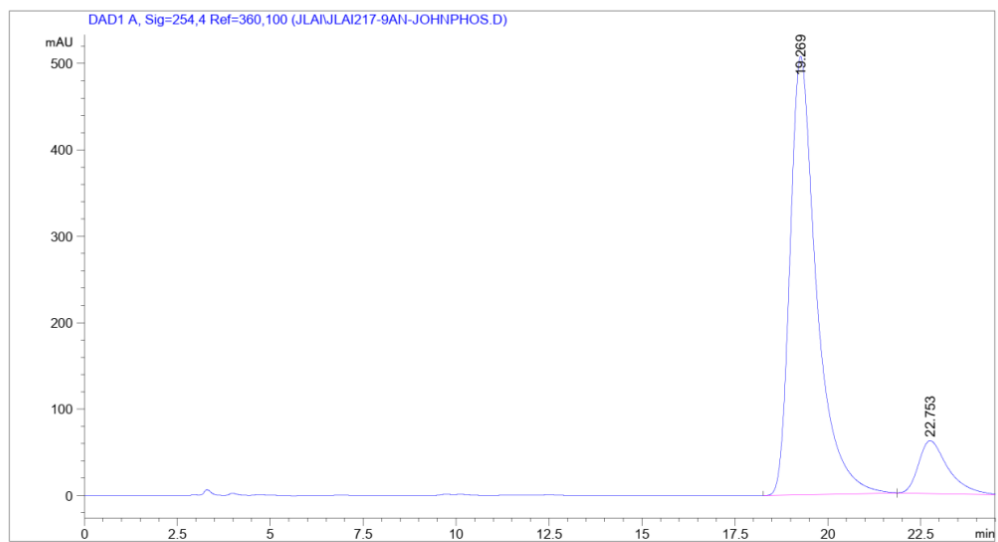

| Peak # | RetTime [min] | Type | Width [min] | Area [mAU*s] | Height [mAU] | Area %  |
|--------|---------------|------|-------------|--------------|--------------|---------|
| 1      | 19.269        | BB   | 0.7339      | 2.51391e4    | 507.49442    | 88.0991 |
| 2      | 22.753        | BB   | 0.8271      | 3395.90894   | 61.22491     | 11.9009 |

## References

- (1) Zhao, Y.; Truhlar, D. G. The M06 suite of density functionals for main group thermochemistry, thermochemical kinetics, noncovalent interactions, excited states, and transition elements: two new functionals and systematic testing of four M06-class functionals and 12 other functionals. *Theor. Chem. Acc.* **2008**, *120*, 215–241.
- (2) Weigend, F.; Ahlrichs, R. Balanced basis sets of split valence, triple zeta valence and quadruple zeta valence quality for H to Rn: Design and assessment of accuracy. *Phys. Chem. Chem. Phys.* **2005**, *7*, 3297–3305.
- (3) Frisch, M. J. et al. Gaussian 09, Revision D.01, Gaussian, Inc.: Wallingford, CT 2013.
- (4) Ermanis, K.; Parkes, K. E. B.; Agback, T.; Goodman, J. M. Expanding DP4: application to drug compounds and automation. *Org. Biomol. Chem.*, **2016**, *14*, 3943–3949.
- (5) Glendening, E. D. et al. NBO 6.0. (Theoretical Chemistry Institute, University of Wisconsin, Madison, WI, 2013), <http://nbo6.chem.wisc.edu/>.
- (6) Piou, T. et al. Correlating Reactivity and Selectivity to Cyclopentadienyl Ligand Properties in Rh(III)-Catalyzed C–H Activation Reactions: An Experimental and Computational Study. *J. Am. Chem. Soc.* **2017**, *139*, 1296–1310.
- (7) MacroModel, version 11.7, Schrödinger, LLC, New York, NY, 2017.
- (8) Harder, E. et al. OPLS3: A Force Field Providing Broad Coverage of Drug-like Small Molecules and Proteins. *J. Chem. Theory Comput.* **2016**, *12*, 281–296.
- (9) MATLAB and Statistics Toolbox Release R2018b, The MathWorks, Inc., Natick, Massachusetts, United States.
- (10) Reid, J. P.; Sigman, M. S. Holistic prediction of enantioselectivity in asymmetric catalysis. *Nature* **2019**, *571*, 343–348.
- (11) Shoja, A.; Zhai, J.; Reid, J. P. Comprehensive Stereochemical Models for Selectivity Prediction in Diverse Chiral Phosphate-Catalyzed Reaction Space. *ACS Catal.* **2021**, *11*, 11897–11905.
- (12) Verloop, A.; Tipker, J. A comparative study of new steric parameters in drug design. *Pharmacochem. Libr.* **1977**, *2*, 263–81.
- (13) Verloop, A.; Tipker, J. Physical basis of sterimol and related steric constants. *Pharmacochem. Libr.* **1987**, *10*, 97–102.
- (14) Santiago, C. B.; Guo, J.-Y.; Sigman, M. S. Predictive and mechanistic multivariate linear regression models for reaction development. *Chem. Sci.* **2018**, *9*, 2398–2412.
- (15) Todeschini, R.; Consonni, V. Handbook of Molecular Descriptors (eds Timmerman, H.; Kubinyi, H.) (Wiley-VCH, Weinheim, 2000) and references therein.
- (16) Guo, J.-Y.; Minko, Y.; Santiago, C. B.; Sigman, M. S. Developing Comprehensive Computational Parameter Sets To Describe the Performance of Pyridine-Oxazoline and Related Ligands. *ACS Catal.* **2017**, *7*, 4144–4151.
- (17) Simón, L.; Goodman, J. M. A Model for the Enantioselectivity of Imine Reactions Catalyzed by BINOL-Phosphoric Acid Catalysts. *J. Org. Chem.* **2011**, *76*, 1775–1788.
- (18) Suarez-Pantiga, S.; Hernandez-Diaz, C.; Rubio, E.; Gonzalez, J. M. Intermolecular [2+ 2] Reaction of N-Allenylsulfonamides with Vinylarenes: Enantioselective Gold (I)-Catalyzed Synthesis of Cyclobutane Derivatives. *Angew. Chem., Int. Ed.* **2012**, *51*, 11552–11555.
- (19) Romanov-Michailidis, F.; Romanova-Michaelides, M.; Pupier, M.; Alexakis, A. Enantioselective Halogenative Semi-Pinacol Rearrangement: Extension of Substrate Scope and Mechanistic Investigations. *Chem. Eur. J.* **2015**, *21*, 5561–5583.



(20) Zhang, Q.W.; Xiang, K.; Tu, Y. Q. ; Zhang, S.Y.; Zhang, X. M.; Zhao, Y. M.; Zhang, T.C. Formal Synthesis of (-)-Cephalotaxine Based on a Tandem Hydroamination/Semipinacol Rearrangement Reaction. *Chem.-Asian. J.* **2012**, 7, 894-898.
